# Supplementary material
Source: publisher figshare collection journal article supplement (https://gsajournals.figshare.com/articles/dataset/_/8956511)
Supplement: Supplementary file 1 [file 1]

## Sheet: genes
test_id	ncbi_gene_link	gene_symbol	gene_id	gene_desc	locus	sample_1	sample_2	status	value_1	value_2	log2(fold_change)	test_stat	p_value	q_value	significant	linear_fold_change	diff_exp
tY(GUA)Q	tY(GUA)Q	tY(GUA)Q	.	.	Mito:70823-70907	WT	ksp1-KD	OK	0	29.5006	inf		0.00355	0.012573	yes	inf	Yes
tA(UGC)Q	tA(UGC)Q	tA(UGC)Q	.	.	Mito:69845-69921	WT	ksp1-KD	OK	0	57.846	inf		0.0003	0.00149174	yes	inf	Yes
YLR307C-A	YLR307C-A	YLR307C-A	.	.	XII:746847-747111	WT	ksp1-KD	OK	39.5766	1811.85	5.51667	48.5952	5e-05	0.000294606	yes	45.7808	Yes
YPR036W-A	YPR036W-A	YPR036W-A	.	.	XVI:645949-646153	WT	ksp1-KD	OK	95.5572	2239.63	4.55076	37.2106	5e-05	0.000294606	yes	23.4377	Yes
YGL117W	YGL117W	YGL117W	.	.	VII:288511-289309	WT	ksp1-KD	OK	25.6832	543.405	4.40313	16.086	5e-05	0.000294606	yes	21.158	Yes
YER175C	YER175C	YER175C	.	.	V:539463-540363	WT	ksp1-KD	OK	94.7916	1819.34	4.26251	15.5915	5e-05	0.000294606	yes	19.193	Yes
YPL250C	YPL250C	YPL250C	.	.	XVI:74308-74719	WT	ksp1-KD	OK	22.8564	434.127	4.24745	18.5204	5e-05	0.000294606	yes	18.9937	Yes
YPL092W	YPL092W	YPL092W	.	.	XVI:373792-375169	WT	ksp1-KD	OK	21.1395	362.745	4.10094	13.9374	5e-05	0.000294606	yes	17.1596	Yes
YBR296C-A	YBR296C-A	YBR296C-A	.	.	II:800122-800242	WT	ksp1-KD	OK	8.83661	138.976	3.9752	9.48338	0.00265	0.00978543	yes	15.7273	Yes
YFL014W	YFL014W	YFL014W	.	.	VI:107255-107585	WT	ksp1-KD	OK	898.949	13655	3.92505	17.2436	5e-05	0.000294606	yes	15.19	Yes
YPL033C	YPL033C	YPL033C	.	.	XVI:487361-488207	WT	ksp1-KD	OK	4.43703	66.4875	3.90542	22.6715	5e-05	0.000294606	yes	14.9847	Yes
YNR069C	YNR069C	YNR069C	.	.	XIV:761122-762592	WT	ksp1-KD	OK	23.0236	319.493	3.7946	15.0268	5e-05	0.000294606	yes	13.8768	Yes
YJR095W	YJR095W	YJR095W	.	.	X:609772-610741	WT	ksp1-KD	OK	2.80356	36.125	3.68766	10.5561	5e-05	0.000294606	yes	12.8854	Yes
YNR068C	YNR068C	YNR068C	.	.	XIV:760066-760885	WT	ksp1-KD	OK	30.6241	369.879	3.59431	17.6411	5e-05	0.000294606	yes	12.078	Yes
YHR071W	YHR071W	YHR071W	.	.	VIII:237003-237693	WT	ksp1-KD	OK	114.256	1327.24	3.53809	15.4818	5e-05	0.000294606	yes	11.6164	Yes
YPL251W	YPL251W	YPL251W	.	.	XVI:73362-73927	WT	ksp1-KD	OK	20.8898	233.202	3.48071	8.67784	5e-05	0.000294606	yes	11.1634	Yes
YMR107W	YMR107W	YMR107W	.	.	XIII:483013-483361	WT	ksp1-KD	OK	234.552	2535.45	3.43426	23.3653	5e-05	0.000294606	yes	10.8097	Yes
YJL088W	YJL088W	YJL088W	.	.	X:268798-269815	WT	ksp1-KD	OK	187.095	1965.73	3.39322	12.3447	5e-05	0.000294606	yes	10.5066	Yes
YBR116C	YBR116C	YBR116C	.	.	II:474198-476437	WT	ksp1-KD	OK	4.0942	40.6595	3.31194	3.52403	5e-05	0.000294606	yes	9.93101	Yes
YGL184C	YGL184C	YGL184C	.	.	VII:154614-156012	WT	ksp1-KD	OK	34.3954	339.42	3.30279	15.3542	5e-05	0.000294606	yes	9.86822	Yes
YPL252C	YPL252C	YPL252C	.	.	XVI:73362-73927	WT	ksp1-KD	OK	23.0435	227.09	3.30083	16.6446	5e-05	0.000294606	yes	9.85482	Yes
YJL089W	YJL089W	YJL089W	.	.	X:265925-268415	WT	ksp1-KD	OK	2.89483	27.428	3.2441	13.1282	5e-05	0.000294606	yes	9.47483	Yes
YMR096W	YMR096W	YMR096W	.	.	XIII:458407-459301	WT	ksp1-KD	OK	143.292	1265.65	3.14285	17.9043	5e-05	0.000294606	yes	8.83267	Yes
YGR043C	YGR043C	YGR043C	.	.	VII:580434-581436	WT	ksp1-KD	OK	20.0895	175.865	3.12996	12.2314	5e-05	0.000294606	yes	8.75411	Yes
YBR147W	YBR147W	YBR147W	.	.	II:536574-537465	WT	ksp1-KD	OK	113.465	979.651	3.11002	13.9967	5e-05	0.000294606	yes	8.63395	Yes
YJR109C	YJR109C	YJR109C	.	.	X:629584-632941	WT	ksp1-KD	OK	85.0324	733.587	3.10888	10.5107	5e-05	0.000294606	yes	8.62713	Yes
YNL104C	YNL104C	YNL104C	.	.	XIV:424894-426808	WT	ksp1-KD	OK	72.7481	621.514	3.09481	11.8502	5e-05	0.000294606	yes	8.5434	Yes
YBR068C	YBR068C	YBR068C	.	.	II:373860-375690	WT	ksp1-KD	OK	11.7417	99.5981	3.08447	12.4802	5e-05	0.000294606	yes	8.48239	Yes
YDL222C	YDL222C	YDL222C	.	.	IV:60871-61801	WT	ksp1-KD	OK	4.72831	40.0213	3.08137	10.7867	5e-05	0.000294606	yes	8.46418	Yes
YOL140W	YOL140W	YOL140W	.	.	XV:58758-60030	WT	ksp1-KD	OK	41.1648	344.109	3.06338	54.2655	5e-05	0.000294606	yes	8.35929	Yes
YBR256C	YBR256C	YBR256C	.	.	II:727385-728102	WT	ksp1-KD	OK	364.074	3028.67	3.05638	13.5495	5e-05	0.000294606	yes	8.31883	Yes
YDR035W	YDR035W	YDR035W	.	.	IV:521815-522928	WT	ksp1-KD	OK	241.6	1855.13	2.94083	11.0722	5e-05	0.000294606	yes	7.67853	Yes
YIR034C	YIR034C	YIR034C	.	.	IX:419614-420736	WT	ksp1-KD	OK	82.4729	617.521	2.9045	11.4463	5e-05	0.000294606	yes	7.48758	Yes
YER052C	YER052C	YER052C	.	.	V:256374-257958	WT	ksp1-KD	OK	111.207	815.462	2.87437	10.9684	5e-05	0.000294606	yes	7.33283	Yes
YHR018C	YHR018C	YHR018C	.	.	VIII:140010-141402	WT	ksp1-KD	OK	1348.76	9701.55	2.84658	9.33466	5e-05	0.000294606	yes	7.19293	Yes
YBR047W	YBR047W	YBR047W	.	.	II:331832-332360	WT	ksp1-KD	OK	18.0541	123.987	2.77979	16.53	5e-05	0.000294606	yes	6.86752	Yes
YER065C	YER065C	YER065C	.	.	V:285240-286914	WT	ksp1-KD	OK	42.3207	286.678	2.76	9.09976	5e-05	0.000294606	yes	6.77396	Yes
YOL058W	YOL058W	YOL058W	.	.	XV:219210-220473	WT	ksp1-KD	OK	654.098	4316.16	2.72217	9.96921	5e-05	0.000294606	yes	6.59865	Yes
YER073W	YER073W	YER073W	.	.	V:304029-305592	WT	ksp1-KD	OK	60.5666	394.655	2.704	14.5262	5e-05	0.000294606	yes	6.51606	Yes
YMR095C	YMR095C	YMR095C	.	.	XIII:457284-457959	WT	ksp1-KD	OK	11.7368	75.0268	2.67636	44.5764	5e-05	0.000294606	yes	6.39241	Yes
YNR058W	YNR058W	YNR058W	.	.	XIV:734290-735733	WT	ksp1-KD	OK	13.3396	84.0148	2.65493	17.0308	5e-05	0.000294606	yes	6.29816	Yes
YDR158W	YDR158W	YDR158W	.	.	IV:770356-771454	WT	ksp1-KD	OK	396.114	2480.26	2.6465	9.23611	5e-05	0.000294606	yes	6.26146	Yes
YER085C	YER085C	YER085C	.	.	V:327597-328140	WT	ksp1-KD	OK	2.19151	13.3558	2.60747	5.69167	5e-05	0.000294606	yes	6.09434	Yes
YOL052C-A	YOL052C-A	YOL052C-A	.	.	XV:231569-231755	WT	ksp1-KD	OK	439.93	2659.5	2.59581	13.9425	5e-05	0.000294606	yes	6.04528	Yes
YBR117C	YBR117C	YBR117C	.	.	II:474198-476437	WT	ksp1-KD	OK	9.17866	54.5674	2.57168	7.434	5e-05	0.000294606	yes	5.94501	Yes
YJR130C	YJR130C	YJR130C	.	.	X:665217-667137	WT	ksp1-KD	OK	54.5347	322.714	2.56501	10.0656	5e-05	0.000294606	yes	5.91759	Yes
YER174C	YER174C	YER174C	.	.	V:538433-539168	WT	ksp1-KD	OK	79.6145	452.943	2.50823	11.675	5e-05	0.000294606	yes	5.68922	Yes
YGL183C	YGL183C	YGL183C	.	.	VII:156542-157596	WT	ksp1-KD	OK	7.84505	43.9732	2.48677	12.0136	5e-05	0.000294606	yes	5.60522	Yes
YPL223C	YPL223C	YPL223C	.	.	XVI:128631-129138	WT	ksp1-KD	OK	41.9204	234.53	2.48405	9.65898	5e-05	0.000294606	yes	5.59466	Yes
YOR202W	YOR202W	YOR202W	.	.	XV:721945-724725	WT	ksp1-KD	OK	752.339	4196.77	2.47983	11.7436	5e-05	0.000294606	yes	5.57832	Yes
YGL182C	YGL182C	YGL182C	.	.	VII:156542-157596	WT	ksp1-KD	OK	1.09921	6.0242	2.45431	2.23734	0.0017	0.00674088	yes	5.48051	Yes
YMR062C	YMR062C	YMR062C	.	.	XIII:395053-396379	WT	ksp1-KD	OK	172.8	946.875	2.45407	8.92743	5e-05	0.000294606	yes	5.4796	Yes
YOR203W	YOR203W	YOR203W	.	.	XV:721945-724725	WT	ksp1-KD	OK	90.8427	494.78	2.44535	1.58812	0.01185	0.0344732	yes	5.44658	Yes
YBR115C	YBR115C	YBR115C	.	.	II:469747-473926	WT	ksp1-KD	OK	31.2177	168.218	2.4299	8.97365	5e-05	0.000294606	yes	5.38856	Yes
YCL075W	YCL075W	YCL075W	.	.	III:1391-2566	WT	ksp1-KD	OK	1.55649	8.36842	2.42666	4.78449	5e-05	0.000294606	yes	5.37647	Yes
YGR154C	YGR154C	YGR154C	.	.	VII:796797-797868	WT	ksp1-KD	OK	38.2489	203.588	2.41216	12.331	5e-05	0.000294606	yes	5.32271	Yes
YHR096C	YHR096C	YHR096C	.	.	VIII:294668-296447	WT	ksp1-KD	OK	30.6411	162.795	2.40952	9.18369	5e-05	0.000294606	yes	5.31298	Yes
YIL046W-A	YIL046W-A	YIL046W-A	.	.	IX:268308-268473	WT	ksp1-KD	OK	1.37598	7.28865	2.40519	2.81944	0.01725	0.0471041	yes	5.29705	Yes
YOR121C	YOR121C	YOR121C	.	.	XV:551113-552103	WT	ksp1-KD	OK	120.706	637.035	2.39987	16.4173	5e-05	0.000294606	yes	5.27756	Yes
YNL221C	YNL221C	YNL221C	.	.	XIV:231067-233695	WT	ksp1-KD	OK	27.5168	143.538	2.38304	9.67054	5e-05	0.000294606	yes	5.21635	Yes
YPR167C	YPR167C	YPR167C	.	.	XVI:876846-877632	WT	ksp1-KD	OK	80.1557	417.414	2.3806	14.1273	5e-05	0.000294606	yes	5.20753	Yes
YJR137C	YJR137C	YJR137C	.	.	X:678956-683285	WT	ksp1-KD	OK	35.2331	182.083	2.3696	8.72904	5e-05	0.000294606	yes	5.16798	Yes
YHR208W	YHR208W	YHR208W	.	.	VIII:517531-518713	WT	ksp1-KD	OK	192.934	986.817	2.35468	7.90741	5e-05	0.000294606	yes	5.11481	Yes
YJR111C	YJR111C	YJR111C	.	.	X:635854-636706	WT	ksp1-KD	OK	42.7949	214.83	2.32769	11.9955	5e-05	0.000294606	yes	5.02001	Yes
YOR391C	YOR391C	YOR391C	.	.	XV:1078544-1079258	WT	ksp1-KD	OK	1.56293	7.81117	2.32129	6.06007	5e-05	0.000294606	yes	4.99779	Yes
YKL086W	YKL086W	YKL086W	.	.	XI:278280-278664	WT	ksp1-KD	OK	6.07277	30.3494	2.32124	6.74894	5e-05	0.000294606	yes	4.99762	Yes
YHR122W	YHR122W	YHR122W	.	.	VIII:353624-354320	WT	ksp1-KD	OK	51.7557	257.95	2.3173	10.2433	5e-05	0.000294606	yes	4.98399	Yes
YKL163W	YKL163W	YKL163W	.	.	XI:144400-145378	WT	ksp1-KD	OK	21.5197	107.207	2.31667	10.389	5e-05	0.000294606	yes	4.98181	Yes
YER069W	YER069W	YER069W	.	.	V:295300-298001	WT	ksp1-KD	OK	212.44	1044.53	2.29773	7.35446	5e-05	0.000294606	yes	4.91684	Yes
YOR222W	YOR222W	YOR222W	.	.	XV:758329-759253	WT	ksp1-KD	OK	287.395	1408.35	2.2929	8.11464	5e-05	0.000294606	yes	4.9004	Yes
YLR406C-A	YLR406C-A	YLR406C-A	.	.	XII:932205-932355	WT	ksp1-KD	OK	0.569746	2.73733	2.26438	2.35653	0.01835	0.0496076	yes	4.80448	Yes
YOR120W	YOR120W	YOR120W	.	.	XV:551113-552103	WT	ksp1-KD	OK	83.1426	398.452	2.26075	7.8102	5e-05	0.000294606	yes	4.79241	Yes
YMR322C	YMR322C	YMR322C	.	.	XIII:918365-919079	WT	ksp1-KD	OK	4.48086	21.4292	2.25773	7.89694	5e-05	0.000294606	yes	4.78238	Yes
YBR294W	YBR294W	YBR294W	.	.	II:789234-791814	WT	ksp1-KD	OK	10.0517	47.35	2.23593	9.8481	5e-05	0.000294606	yes	4.71066	Yes
YHR033W	YHR033W	YHR033W	.	.	VIII:175547-176819	WT	ksp1-KD	OK	1.79252	8.44092	2.23542	7.17829	5e-05	0.000294606	yes	4.709	Yes
YER055C	YER055C	YER055C	.	.	V:264891-265785	WT	ksp1-KD	OK	387.079	1820.5	2.23363	8.66899	5e-05	0.000294606	yes	4.70316	Yes
YGL059W	YGL059W	YGL059W	.	.	VII:392222-393698	WT	ksp1-KD	OK	43.2284	202.161	2.22545	9.60975	5e-05	0.000294606	yes	4.67657	Yes
YLL055W	YLL055W	YLL055W	.	.	XII:30108-31704	WT	ksp1-KD	OK	15.6398	72.8171	2.21905	16.4074	5e-05	0.000294606	yes	4.65587	Yes
YCL030C	YCL030C	YCL030C	.	.	III:65933-68333	WT	ksp1-KD	OK	283.062	1317.74	2.21887	7.14127	5e-05	0.000294606	yes	4.65529	Yes
YCL074W	YCL074W	YCL074W	.	.	III:2823-3750	WT	ksp1-KD	OK	1.36562	6.34827	2.21681	6.98083	5e-05	0.000294606	yes	4.64864	Yes
YDL182W	YDL182W	YDL182W	.	.	IV:133436-134723	WT	ksp1-KD	OK	49.421	229.422	2.21481	9.55857	5e-05	0.000294606	yes	4.6422	Yes
YDR070C	YDR070C	YDR070C	.	.	IV:588097-588379	WT	ksp1-KD	OK	441.125	2047.47	2.21458	10.5353	5e-05	0.000294606	yes	4.64146	Yes
YOR302W	YOR302W	YOR302W	.	.	XV:882764-882842	WT	ksp1-KD	OK	17286.2	79572.2	2.20264	18.1981	5e-05	0.000294606	yes	4.60321	Yes
YJR016C	YJR016C	YJR016C	.	.	X:464450-466208	WT	ksp1-KD	OK	261.955	1204.87	2.20148	8.57589	5e-05	0.000294606	yes	4.59951	Yes
YDL198C	YDL198C	YDL198C	.	.	IV:103648-104551	WT	ksp1-KD	OK	207.586	951.603	2.19665	8.98117	5e-05	0.000294606	yes	4.58414	Yes
YJR094C	YJR094C	YJR094C	.	.	X:604568-605651	WT	ksp1-KD	OK	3.77042	17.1657	2.18673	7.87739	5e-05	0.000294606	yes	4.55272	Yes
YOR108W	YOR108W	YOR108W	.	.	XV:523026-524841	WT	ksp1-KD	OK	19.0932	86.1401	2.17363	9.16998	5e-05	0.000294606	yes	4.51157	Yes
YAL067C	YAL067C	YAL067C	.	.	I:7234-9016	WT	ksp1-KD	OK	4.45953	19.837	2.15323	7.86134	5e-05	0.000294606	yes	4.44823	Yes
YIL116W	YIL116W	YIL116W	.	.	IX:142927-144085	WT	ksp1-KD	OK	443.07	1953.16	2.14021	8.20151	5e-05	0.000294606	yes	4.40826	Yes
YIR039C	YIR039C	YIR039C	.	.	IX:430497-432111	WT	ksp1-KD	OK	3.1235	13.5932	2.12165	7.59764	5e-05	0.000294606	yes	4.35191	Yes
YLL046C	YLL046C	YLL046C	.	.	XII:46671-47463	WT	ksp1-KD	OK	0.610882	2.63238	2.1074	3.99465	5e-05	0.000294606	yes	4.30914	Yes
YMR271C	YMR271C	YMR271C	.	.	XIII:806864-807548	WT	ksp1-KD	OK	73.9021	318.328	2.10683	9.65076	5e-05	0.000294606	yes	4.30744	Yes
YBR145W	YBR145W	YBR145W	.	.	II:533761-534817	WT	ksp1-KD	OK	67.3426	288.687	2.09991	9.36356	5e-05	0.000294606	yes	4.28683	Yes
YKL218C	YKL218C	YKL218C	.	.	XI:17358-18339	WT	ksp1-KD	OK	342.353	1432.5	2.06498	9.07928	5e-05	0.000294606	yes	4.18428	Yes
YJR150C	YJR150C	YJR150C	.	.	X:708810-709707	WT	ksp1-KD	OK	0.581322	2.41557	2.05495	6.21869	5e-05	0.000294606	yes	4.15529	Yes
YDL204W	YDL204W	YDL204W	.	.	IV:94604-95786	WT	ksp1-KD	OK	20.074	83.2308	2.05179	8.05905	5e-05	0.000294606	yes	4.1462	Yes
YLR174W	YLR174W	YLR174W	.	.	XII:504590-505829	WT	ksp1-KD	OK	173.96	719.811	2.04887	11.802	5e-05	0.000294606	yes	4.13782	Yes
YBR249C	YBR249C	YBR249C	.	.	II:716881-717994	WT	ksp1-KD	OK	270.457	1116.99	2.04615	7.51532	5e-05	0.000294606	yes	4.13002	Yes
YGR088W	YGR088W	YGR088W	.	.	VII:654633-656322	WT	ksp1-KD	OK	56.128	231.136	2.04195	8.2185	5e-05	0.000294606	yes	4.11802	Yes
YGR066C	YGR066C	YGR066C	.	.	VII:620920-621799	WT	ksp1-KD	OK	20.4525	84.0854	2.03958	8.37367	5e-05	0.000294606	yes	4.11126	Yes
YKL211C	YKL211C	YKL211C	.	.	XI:36698-38153	WT	ksp1-KD	OK	83.5028	338.252	2.0182	7.79964	5e-05	0.000294606	yes	4.05078	Yes
YPR078C	YPR078C	YPR078C	.	.	XVI:697130-698265	WT	ksp1-KD	OK	4.1181	16.6508	2.01554	6.43096	5e-05	0.000294606	yes	4.04332	Yes
YOL119C	YOL119C	YOL119C	.	.	XV:94855-96361	WT	ksp1-KD	OK	147.152	594.327	2.01395	7.26171	5e-05	0.000294606	yes	4.03887	Yes
YLR152C	YLR152C	YLR152C	.	.	XII:442957-444688	WT	ksp1-KD	OK	32.5422	130.127	1.99953	8.44245	5e-05	0.000294606	yes	3.9987	Yes
YKR004C	YKR004C	YKR004C	.	.	XI:446798-448036	WT	ksp1-KD	OK	15.0147	59.9383	1.9971	10.53	5e-05	0.000294606	yes	3.99197	Yes
YPL036W	YPL036W	YPL036W	.	.	XVI:482842-485686	WT	ksp1-KD	OK	7.55925	30.1226	1.99453	8.55497	5e-05	0.000294606	yes	3.98486	Yes
YOR392W	YOR392W	YOR392W	.	.	XV:1079281-1079725	WT	ksp1-KD	OK	2.0779	8.27108	1.99295	4.63556	5e-05	0.000294606	yes	3.9805	Yes
YGL202W	YGL202W	YGL202W	.	.	VII:116058-117561	WT	ksp1-KD	OK	456.275	1813.03	1.99042	6.74499	5e-05	0.000294606	yes	3.97353	Yes
YJL071W	YJL071W	YJL071W	.	.	X:306131-307856	WT	ksp1-KD	OK	14.6723	58.0328	1.98378	9.41879	5e-05	0.000294606	yes	3.95528	Yes
YJR025C	YJR025C	YJR025C	.	.	X:471137-471671	WT	ksp1-KD	OK	214.292	844.067	1.97778	31.8317	5e-05	0.000294606	yes	3.93887	Yes
YGL224C	YGL224C	YGL224C	.	.	VII:78014-78857	WT	ksp1-KD	OK	196.681	772.88	1.97438	7.63248	5e-05	0.000294606	yes	3.92959	Yes
snR49	snR49	snR49	.	.	XIV:716119-716284	WT	ksp1-KD	OK	2.39567	9.38308	1.96963	4.99333	0.0038	0.0133421	yes	3.91668	Yes
YMR175W	YMR175W	YMR175W	.	.	XIII:611015-611255	WT	ksp1-KD	OK	210.632	821.428	1.96341	7.30592	5e-05	0.000294606	yes	3.89983	Yes
YER090W	YER090W	YER090W	.	.	V:337948-339472	WT	ksp1-KD	OK	100.842	392.972	1.96233	7.74163	5e-05	0.000294606	yes	3.89691	Yes
YOR173W	YOR173W	YOR173W	.	.	XV:657263-658325	WT	ksp1-KD	OK	31.9876	124.555	1.9612	10.3658	5e-05	0.000294606	yes	3.89386	Yes
YDL085W	YDL085W	YDL085W	.	.	IV:303210-304848	WT	ksp1-KD	OK	17.4779	67.9156	1.95821	8.84976	5e-05	0.000294606	yes	3.8858	Yes
YNL019C	YNL019C	YNL019C	.	.	XIV:598375-599230	WT	ksp1-KD	OK	0.186124	0.722874	1.95748	3.67068	5e-05	0.000294606	yes	3.88383	Yes
YGR239C	YGR239C	YGR239C	.	.	VII:969186-970053	WT	ksp1-KD	OK	60.2137	233.606	1.95591	9.86368	5e-05	0.000294606	yes	3.87961	Yes
YML100W-A	YML100W-A	YML100W-A	.	.	XIII:70137-70311	WT	ksp1-KD	OK	1.47129	5.62665	1.93519	1.90839	0.00535	0.0177668	yes	3.82428	Yes
YCL018W	YCL018W	YCL018W	.	.	III:91323-92418	WT	ksp1-KD	OK	109.489	417.149	1.92978	7.51278	5e-05	0.000294606	yes	3.80997	Yes
YDL054C	YDL054C	YDL054C	.	.	IV:359824-361285	WT	ksp1-KD	OK	47.7018	180.848	1.92267	9.59532	5e-05	0.000294606	yes	3.79124	Yes
YBR248C	YBR248C	YBR248C	.	.	II:714806-716465	WT	ksp1-KD	OK	130.75	491.11	1.90924	8.31833	5e-05	0.000294606	yes	3.75611	Yes
YOR108C-A	YOR108C-A	YOR108C-A	.	.	XV:523026-524841	WT	ksp1-KD	OK	114.374	426.451	1.89862	2.5956	0.0002	0.00103818	yes	3.72856	Yes
YOR337W	YOR337W	YOR337W	.	.	XV:954343-956623	WT	ksp1-KD	OK	35.5002	131.577	1.89001	13.2541	5e-05	0.000294606	yes	3.70638	Yes
YIL160C	YIL160C	YIL160C	.	.	IX:40190-41444	WT	ksp1-KD	OK	30.5509	112.906	1.88584	9.11857	5e-05	0.000294606	yes	3.69568	Yes
YLR303W	YLR303W	YLR303W	.	.	XII:732190-733876	WT	ksp1-KD	OK	368.097	1357.5	1.88279	6.23206	5e-05	0.000294606	yes	3.68788	Yes
YDR274C	YDR274C	YDR274C	.	.	IV:1011588-1011960	WT	ksp1-KD	OK	8.76495	31.9273	1.86497	7.48297	5e-05	0.000294606	yes	3.6426	Yes
YGR065C	YGR065C	YGR065C	.	.	VII:618076-619858	WT	ksp1-KD	OK	28.578	103.871	1.86181	7.39702	5e-05	0.000294606	yes	3.63463	Yes
YPL021W	YPL021W	YPL021W	.	.	XVI:511100-511664	WT	ksp1-KD	OK	0.0961263	0.349107	1.86067	2.12861	0.00175	0.00690543	yes	3.63176	Yes
YNL270C	YNL270C	YNL270C	.	.	XIV:135939-137661	WT	ksp1-KD	OK	0.682792	2.46868	1.85422	5.06234	5e-05	0.000294606	yes	3.61556	Yes
YOR130C	YOR130C	YOR130C	.	.	XV:569928-570807	WT	ksp1-KD	OK	76.4112	275.934	1.85247	11.691	5e-05	0.000294606	yes	3.61118	Yes
YDR453C	YDR453C	YDR453C	.	.	IV:1365071-1365662	WT	ksp1-KD	OK	54.4614	194.219	1.83438	8.60993	5e-05	0.000294606	yes	3.56618	Yes
YML128C	YML128C	YML128C	.	.	XIII:15134-16676	WT	ksp1-KD	OK	111.198	393.939	1.82484	6.77542	5e-05	0.000294606	yes	3.54268	Yes
YKR080W	YKR080W	YKR080W	.	.	XI:590394-591357	WT	ksp1-KD	OK	40.5668	143.674	1.82443	10.1485	5e-05	0.000294606	yes	3.54167	Yes
YPR007C	YPR007C	YPR007C	.	.	XVI:569335-571378	WT	ksp1-KD	OK	1.13237	3.98397	1.81485	4.97537	5e-05	0.000294606	yes	3.51823	Yes
YCR005C	YCR005C	YCR005C	.	.	III:120945-122328	WT	ksp1-KD	OK	90.6045	316.631	1.80515	7.95628	5e-05	0.000294606	yes	3.49465	Yes
YNR057C	YNR057C	YNR057C	.	.	XIV:733355-734069	WT	ksp1-KD	OK	20.7691	72.521	1.80396	8.30798	5e-05	0.000294606	yes	3.49177	Yes
YGR256W	YGR256W	YGR256W	.	.	VII:1004623-1006102	WT	ksp1-KD	OK	22.2891	76.7241	1.78334	7.47687	5e-05	0.000294606	yes	3.44222	Yes
YBR104W	YBR104W	YBR104W	.	.	II:449666-450656	WT	ksp1-KD	OK	64.0046	219.387	1.77723	8.29256	5e-05	0.000294606	yes	3.42767	Yes
YPR145W	YPR145W	YPR145W	.	.	XVI:822619-824338	WT	ksp1-KD	OK	67.6773	229.379	1.76099	7.06	5e-05	0.000294606	yes	3.38931	Yes
YKL120W	YKL120W	YKL120W	.	.	XI:217343-218318	WT	ksp1-KD	OK	70.8764	238.929	1.7532	7.40835	5e-05	0.000294606	yes	3.37105	Yes
YPL264C	YPL264C	YPL264C	.	.	XVI:43282-44344	WT	ksp1-KD	OK	19.945	66.886	1.74568	8.68236	5e-05	0.000294606	yes	3.35353	Yes
YDR014W-A	YDR014W-A	YDR014W-A	.	.	IV:477796-478285	WT	ksp1-KD	OK	1.40441	4.70273	1.74354	2.39319	0.0004	0.00194581	yes	3.34856	Yes
YIL117C	YIL117C	YIL117C	.	.	IX:140612-141569	WT	ksp1-KD	OK	3.52472	11.769	1.73941	11.1446	5e-05	0.000294606	yes	3.33899	Yes
YGL026C	YGL026C	YGL026C	.	.	VII:446411-448535	WT	ksp1-KD	OK	157.358	521.838	1.72955	6.08939	5e-05	0.000294606	yes	3.31624	Yes
YFL030W	YFL030W	YFL030W	.	.	VI:76830-77988	WT	ksp1-KD	OK	77.1951	254.623	1.72178	8.50049	5e-05	0.000294606	yes	3.29843	Yes
YJL200C	YJL200C	YJL200C	.	.	X:56443-58813	WT	ksp1-KD	OK	81.2304	266.998	1.71674	7.08926	5e-05	0.000294606	yes	3.28693	Yes
YBR169C	YBR169C	YBR169C	.	.	II:573914-575996	WT	ksp1-KD	OK	33.5534	110.125	1.71461	7.52939	5e-05	0.000294606	yes	3.28208	Yes
YOL064C	YOL064C	YOL064C	.	.	XV:206102-207176	WT	ksp1-KD	OK	149.709	490.547	1.71223	6.83233	5e-05	0.000294606	yes	3.27667	Yes
YLR013W	YLR013W	YLR013W	.	.	XII:171338-171764	WT	ksp1-KD	OK	0.316323	1.03203	1.70601	2.19026	0.00045	0.00216794	yes	3.26257	Yes
YNL179C	YNL179C	YNL179C	.	.	XIV:300665-301103	WT	ksp1-KD	OK	7.28887	23.7077	1.70159	10.8157	5e-05	0.000294606	yes	3.25259	Yes
YOR100C	YOR100C	YOR100C	.	.	XV:513294-514278	WT	ksp1-KD	OK	7.2314	23.498	1.70019	6.21937	5e-05	0.000294606	yes	3.24944	Yes
YDL066W	YDL066W	YDL066W	.	.	IV:334834-336121	WT	ksp1-KD	OK	169.948	550.234	1.69496	6.60366	5e-05	0.000294606	yes	3.23768	Yes
snR55	snR55	snR55	.	.	XII:794696-794794	WT	ksp1-KD	OK	67.4973	216.403	1.68082	3.12161	5e-05	0.000294606	yes	3.2061	Yes
YOL163W	YOL163W	YOL163W	.	.	XV:9596-10106	WT	ksp1-KD	OK	41.5409	133.156	1.68051	7.47348	5e-05	0.000294606	yes	3.20541	Yes
YKL162C-A	YKL162C-A	YKL162C-A	.	.	XI:145921-146074	WT	ksp1-KD	OK	100.616	319.741	1.66804	4.64224	5e-05	0.000294606	yes	3.17783	Yes
YGL205W	YGL205W	YGL205W	.	.	VII:108157-110404	WT	ksp1-KD	OK	11.8663	37.6836	1.66707	7.619	5e-05	0.000294606	yes	3.17569	Yes
YDR127W	YDR127W	YDR127W	.	.	IV:704483-709250	WT	ksp1-KD	OK	56.7889	179.563	1.66081	5.72696	5e-05	0.000294606	yes	3.16194	Yes
YLR058C	YLR058C	YLR058C	.	.	XII:257991-259401	WT	ksp1-KD	OK	218.906	688.679	1.65352	6.44533	5e-05	0.000294606	yes	3.146	Yes
YNR034W-A	YNR034W-A	YNR034W-A	.	.	XIV:692560-692857	WT	ksp1-KD	OK	421.194	1324.99	1.65343	9.76677	5e-05	0.000294606	yes	3.14581	Yes
YDL131W	YDL131W	YDL131W	.	.	IV:227392-228715	WT	ksp1-KD	OK	204.774	642.539	1.64975	5.896	5e-05	0.000294606	yes	3.13779	Yes
YKR069W	YKR069W	YKR069W	.	.	XI:571611-573393	WT	ksp1-KD	OK	33.6346	105.16	1.64457	7.3525	5e-05	0.000294606	yes	3.12655	Yes
YOL091W	YOL091W	YOL091W	.	.	XV:145333-147163	WT	ksp1-KD	OK	5.11221	15.9677	1.64314	6.32765	5e-05	0.000294606	yes	3.12345	Yes
YGR236C	YGR236C	YGR236C	.	.	VII:962529-962817	WT	ksp1-KD	OK	25.2837	78.7922	1.63985	6.76076	5e-05	0.000294606	yes	3.11633	Yes
YDR384C	YDR384C	YDR384C	.	.	IV:1241203-1242031	WT	ksp1-KD	OK	93.1239	288.058	1.62914	7.60298	5e-05	0.000294606	yes	3.09329	Yes
YLR042C	YLR042C	YLR042C	.	.	XII:229965-230451	WT	ksp1-KD	OK	6.08702	18.799	1.62685	6.72989	5e-05	0.000294606	yes	3.08838	Yes
YIL094C	YIL094C	YIL094C	.	.	IX:186516-187632	WT	ksp1-KD	OK	241.655	745.454	1.62517	6.53439	5e-05	0.000294606	yes	3.08479	Yes
YDL223C	YDL223C	YDL223C	.	.	IV:57264-60405	WT	ksp1-KD	OK	14.5036	44.7157	1.62437	8.5918	5e-05	0.000294606	yes	3.08308	Yes
YDL245C	YDL245C	YDL245C	.	.	IV:11656-13360	WT	ksp1-KD	OK	0.46617	1.43321	1.62032	3.8016	5e-05	0.000294606	yes	3.07443	Yes
YKL029C	YKL029C	YKL029C	.	.	XI:382497-384725	WT	ksp1-KD	OK	127.165	390.454	1.61845	5.89883	5e-05	0.000294606	yes	3.07045	Yes
YBR043C	YBR043C	YBR043C	.	.	II:321875-323945	WT	ksp1-KD	OK	136.206	418.01	1.61775	6.06401	5e-05	0.000294606	yes	3.06896	Yes
YPL273W	YPL273W	YPL273W	.	.	XVI:25086-26064	WT	ksp1-KD	OK	43.3829	132.917	1.61532	7.70217	5e-05	0.000294606	yes	3.0638	Yes
YGL125W	YGL125W	YGL125W	.	.	VII:272519-274322	WT	ksp1-KD	OK	44.414	135.511	1.60932	9.81194	5e-05	0.000294606	yes	3.05108	Yes
YIL164C	YIL164C	YIL164C	.	.	IX:34086-34686	WT	ksp1-KD	OK	585.832	1784.83	1.60723	6.28097	5e-05	0.000294606	yes	3.04666	Yes
YNL269W	YNL269W	YNL269W	.	.	XIV:137698-138094	WT	ksp1-KD	OK	1.10566	3.35899	1.60312	8.46868	5e-05	0.000294606	yes	3.038	Yes
YNL220W	YNL220W	YNL220W	.	.	XIV:234412-235714	WT	ksp1-KD	OK	155.469	469.369	1.59409	5.61352	5e-05	0.000294606	yes	3.01904	Yes
YGL032C	YGL032C	YGL032C	.	.	VII:436569-436833	WT	ksp1-KD	OK	9.86067	29.6474	1.58815	6.26468	5e-05	0.000294606	yes	3.00664	Yes
YHL046C	YHL046C	YHL046C	.	.	VIII:11922-12285	WT	ksp1-KD	OK	0.712724	2.13026	1.57961	4.66354	0.0012	0.00503148	yes	2.98889	Yes
YDR258C	YDR258C	YDR258C	.	.	IV:971807-974243	WT	ksp1-KD	OK	144.047	430.285	1.57875	7.22365	5e-05	0.000294606	yes	2.98711	Yes
YMR306C-A	YMR306C-A	YMR306C-A	.	.	XIII:881158-886572	WT	ksp1-KD	OK	6.21565	18.4906	1.57281	2.35469	0.00095	0.00409691	yes	2.97484	Yes
YMR108W	YMR108W	YMR108W	.	.	XIII:484083-486147	WT	ksp1-KD	OK	166.124	489.83	1.56002	5.294	5e-05	0.000294606	yes	2.94858	Yes
YDL124W	YDL124W	YDL124W	.	.	IV:240258-241197	WT	ksp1-KD	OK	144.946	426.591	1.55734	6.13109	5e-05	0.000294606	yes	2.94311	Yes
YDR508C	YDR508C	YDR508C	.	.	IV:1466452-1468573	WT	ksp1-KD	OK	4.69375	13.5857	1.53327	5.60897	5e-05	0.000294606	yes	2.89441	Yes
YJL045W	YJL045W	YJL045W	.	.	X:356023-357928	WT	ksp1-KD	OK	7.25978	20.9907	1.53176	6.80173	5e-05	0.000294606	yes	2.89138	Yes
YDL024C	YDL024C	YDL024C	.	.	IV:408450-410056	WT	ksp1-KD	OK	5.49029	15.7345	1.51897	6.38237	5e-05	0.000294606	yes	2.86586	Yes
YBR072W	YBR072W	YBR072W	.	.	II:382029-382674	WT	ksp1-KD	OK	22.2253	63.3215	1.51049	6.38582	5e-05	0.000294606	yes	2.84907	Yes
YKL033W-A	YKL033W-A	YKL033W-A	.	.	XI:374504-375215	WT	ksp1-KD	OK	127.72	362.702	1.5058	7.86268	5e-05	0.000294606	yes	2.83982	Yes
YLL057C	YLL057C	YLL057C	.	.	XII:25755-26994	WT	ksp1-KD	OK	6.9847	19.7999	1.50323	5.67781	5e-05	0.000294606	yes	2.83477	Yes
YAL054C	YAL054C	YAL054C	.	.	I:42880-45022	WT	ksp1-KD	OK	11.1045	31.4153	1.50032	6.8861	5e-05	0.000294606	yes	2.82905	Yes
YJR154W	YJR154W	YJR154W	.	.	X:725783-726824	WT	ksp1-KD	OK	28.6391	80.6254	1.49325	8.13063	5e-05	0.000294606	yes	2.81522	Yes
YPL135C-A	YPL135C-A	YPL135C-A	.	.	XVI:297552-298050	WT	ksp1-KD	OK	2094.23	5858.45	1.4841	3.39732	0.0001	0.000557854	yes	2.79743	Yes
YOL164W	YOL164W	YOL164W	.	.	XV:6174-8115	WT	ksp1-KD	OK	60.5077	168.22	1.47516	6.61328	5e-05	0.000294606	yes	2.78014	Yes
YKL118W	YKL118W	YKL118W	.	.	XI:218569-219437	WT	ksp1-KD	OK	3.13077	8.70381	1.47513	2.05042	0.01065	0.0315615	yes	2.78009	Yes
YFR030W	YFR030W	YFR030W	.	.	VI:213311-216419	WT	ksp1-KD	OK	57.5779	159.112	1.46646	5.40631	5e-05	0.000294606	yes	2.76343	Yes
YPR111W	YPR111W	YPR111W	.	.	XVI:747305-749000	WT	ksp1-KD	OK	20.8264	57.3727	1.46195	7.32974	5e-05	0.000294606	yes	2.7548	Yes
YPL186C	YPL186C	YPL186C	.	.	XVI:194511-195648	WT	ksp1-KD	OK	61.3344	167.894	1.45278	6.12526	5e-05	0.000294606	yes	2.73735	Yes
YMR303C	YMR303C	YMR303C	.	.	XIII:873290-874337	WT	ksp1-KD	OK	18.7945	51.3036	1.44875	6.40236	5e-05	0.000294606	yes	2.72971	Yes
YOR303W	YOR303W	YOR303W	.	.	XV:882898-884134	WT	ksp1-KD	OK	892.19	2432.31	1.4469	5.01549	5e-05	0.000294606	yes	2.72622	Yes
YPL135W	YPL135W	YPL135W	.	.	XVI:297552-298050	WT	ksp1-KD	OK	296.148	801.174	1.4358	5.12979	5e-05	0.000294606	yes	2.70532	Yes
YCL009C	YCL009C	YCL009C	.	.	III:104618-105548	WT	ksp1-KD	OK	353.035	954.662	1.43518	5.62452	5e-05	0.000294606	yes	2.70416	Yes
YDR487C	YDR487C	YDR487C	.	.	IV:1428353-1428980	WT	ksp1-KD	OK	243.356	657.37	1.43364	6.95613	5e-05	0.000294606	yes	2.70127	Yes
YKL023W	YKL023W	YKL023W	.	.	XI:393720-394554	WT	ksp1-KD	OK	52.9664	142.603	1.42886	6.97583	5e-05	0.000294606	yes	2.69234	Yes
YPL185W	YPL185W	YPL185W	.	.	XVI:194511-195648	WT	ksp1-KD	OK	21.0423	56.6427	1.4286	1.86083	0.0031	0.0111927	yes	2.69185	Yes
YLR308W	YLR308W	YLR308W	.	.	XII:747936-748875	WT	ksp1-KD	OK	0.427101	1.14785	1.42629	2.65042	5e-05	0.000294606	yes	2.68755	Yes
snR10	snR10	snR10	.	.	VII:345835-346230	WT	ksp1-KD	OK	19.8253	53.2812	1.42628	5.04727	5e-05	0.000294606	yes	2.68753	Yes
YNL065W	YNL065W	YNL065W	.	.	XIV:503723-505484	WT	ksp1-KD	OK	58.0292	155.946	1.4262	5.93803	5e-05	0.000294606	yes	2.68738	Yes
YER024W	YER024W	YER024W	.	.	V:202191-204963	WT	ksp1-KD	OK	18.0502	48.4679	1.42501	6.65299	5e-05	0.000294606	yes	2.68516	Yes
YMR090W	YMR090W	YMR090W	.	.	XIII:449244-449928	WT	ksp1-KD	OK	334.95	896.652	1.4206	11.9225	5e-05	0.000294606	yes	2.67697	Yes
YLR004C	YLR004C	YLR004C	.	.	XII:157933-159505	WT	ksp1-KD	OK	22.6144	60.1441	1.41118	6.43841	5e-05	0.000294606	yes	2.65955	Yes
YDR446W	YDR446W	YDR446W	.	.	IV:1353724-1354633	WT	ksp1-KD	OK	0.563843	1.49595	1.4077	2.75515	5e-05	0.000294606	yes	2.65314	Yes
YIL165C	YIL165C	YIL165C	.	.	IX:33717-34077	WT	ksp1-KD	OK	3515.6	9314.17	1.40566	12.4703	5e-05	0.000294606	yes	2.64939	Yes
YJL116C	YJL116C	YJL116C	.	.	X:193859-194873	WT	ksp1-KD	OK	63.5202	168.24	1.40523	6.02268	5e-05	0.000294606	yes	2.6486	Yes
YML042W	YML042W	YML042W	.	.	XIII:192787-194800	WT	ksp1-KD	OK	11.1088	29.2365	1.39606	6.77856	5e-05	0.000294606	yes	2.63182	Yes
YNR050C	YNR050C	YNR050C	.	.	XIV:714047-715388	WT	ksp1-KD	OK	190.326	499.287	1.39139	4.94959	5e-05	0.000294606	yes	2.62331	Yes
YEL070W	YEL070W	YEL070W	.	.	V:19588-21097	WT	ksp1-KD	OK	0.326528	0.855026	1.38876	2.7669	5e-05	0.000294606	yes	2.61854	Yes
YJL072C	YJL072C	YJL072C	.	.	X:305220-305862	WT	ksp1-KD	OK	52.1859	136.09	1.38283	6.3507	5e-05	0.000294606	yes	2.60779	Yes
YGR124W	YGR124W	YGR124W	.	.	VII:739943-741662	WT	ksp1-KD	OK	170.29	443.883	1.38219	4.66161	5e-05	0.000294606	yes	2.60664	Yes
YIL136W	YIL136W	YIL136W	.	.	IX:93618-94800	WT	ksp1-KD	OK	158.161	411.446	1.37931	6.41706	5e-05	0.000294606	yes	2.60144	Yes
YER086W	YER086W	YER086W	.	.	V:328476-330207	WT	ksp1-KD	OK	285.073	739.656	1.37552	5.43062	5e-05	0.000294606	yes	2.59461	Yes
YJL137C	YJL137C	YJL137C	.	.	X:154984-156127	WT	ksp1-KD	OK	22.6667	58.7521	1.37406	6.80623	5e-05	0.000294606	yes	2.59199	Yes
YBR085C-A	YBR085C-A	YBR085C-A	.	.	II:418906-419164	WT	ksp1-KD	OK	1646.76	4263.91	1.37255	5.04545	5e-05	0.000294606	yes	2.58928	Yes
YML116W	YML116W	YML116W	.	.	XIII:38195-39824	WT	ksp1-KD	OK	28.3343	73.3473	1.3722	6.82063	5e-05	0.000294606	yes	2.58865	Yes
YOL101C	YOL101C	YOL101C	.	.	XV:126981-127920	WT	ksp1-KD	OK	4.98604	12.8987	1.37126	4.59305	5e-05	0.000294606	yes	2.58696	Yes
YMR094W	YMR094W	YMR094W	.	.	XIII:455824-457261	WT	ksp1-KD	OK	13.3518	34.3785	1.36447	5.70031	5e-05	0.000294606	yes	2.57482	Yes
YNL117W	YNL117W	YNL117W	.	.	XIV:406357-408022	WT	ksp1-KD	OK	129.038	330.76	1.35799	5.54022	5e-05	0.000294606	yes	2.56328	Yes
YDR019C	YDR019C	YDR019C	.	.	IV:484162-485365	WT	ksp1-KD	OK	62.9905	161.403	1.35746	5.5745	5e-05	0.000294606	yes	2.56234	Yes
YPL171C	YPL171C	YPL171C	.	.	XVI:226168-227371	WT	ksp1-KD	OK	4.42709	11.3096	1.35311	4.56297	5e-05	0.000294606	yes	2.55462	Yes
YGL009C	YGL009C	YGL009C	.	.	VII:476312-478652	WT	ksp1-KD	OK	143.2	364.667	1.34855	5.14934	5e-05	0.000294606	yes	2.54656	Yes
YPL111W	YPL111W	YPL111W	.	.	XVI:339943-340945	WT	ksp1-KD	OK	48.7493	124.034	1.34729	6.15164	5e-05	0.000294606	yes	2.54434	Yes
YBR297W	YBR297W	YBR297W	.	.	II:800522-801929	WT	ksp1-KD	OK	38.907	98.765	1.34397	6.37726	5e-05	0.000294606	yes	2.53849	Yes
YPR145C-A	YPR145C-A	YPR145C-A	.	.	XVI:824689-824926	WT	ksp1-KD	OK	173.71	440.84	1.34357	8.78433	5e-05	0.000294606	yes	2.53779	Yes
YDR374C	YDR374C	YDR374C	.	.	IV:1223473-1224394	WT	ksp1-KD	OK	1.08607	2.7504	1.34052	3.61032	5e-05	0.000294606	yes	2.53243	Yes
YNL240C	YNL240C	YNL240C	.	.	XIV:198501-199977	WT	ksp1-KD	OK	49.2913	124.523	1.337	6.31777	5e-05	0.000294606	yes	2.52625	Yes
YLR092W	YLR092W	YLR092W	.	.	XII:323543-326225	WT	ksp1-KD	OK	23.8251	59.8417	1.32867	5.70919	5e-05	0.000294606	yes	2.51171	Yes
YKR076W	YKR076W	YKR076W	.	.	XI:582282-583395	WT	ksp1-KD	OK	65.3688	162.803	1.31645	6.96537	5e-05	0.000294606	yes	2.49053	Yes
YBL075C	YBL075C	YBL075C	.	.	II:84498-86448	WT	ksp1-KD	OK	27.4691	68.3518	1.31517	5.60767	5e-05	0.000294606	yes	2.48832	Yes
YER062C	YER062C	YER062C	.	.	V:279929-280682	WT	ksp1-KD	OK	306.71	759.839	1.30882	4.83875	5e-05	0.000294606	yes	2.47739	Yes
YGR161W-C	YGR161W-C	YGR161W-C	.	.	VII:810226-810505	WT	ksp1-KD	OK	101.87	252.262	1.30819	5.35041	5e-05	0.000294606	yes	2.47631	Yes
YER176W	YER176W	YER176W	.	.	V:541689-545055	WT	ksp1-KD	OK	23.2343	57.5146	1.30767	5.91104	5e-05	0.000294606	yes	2.47541	Yes
YGR267C	YGR267C	YGR267C	.	.	VII:1025003-1025735	WT	ksp1-KD	OK	433.067	1068.93	1.3035	5.78779	5e-05	0.000294606	yes	2.46827	Yes
YKL188C	YKL188C	YKL188C	.	.	XI:86224-88786	WT	ksp1-KD	OK	7.15262	17.6359	1.30198	7.35907	5e-05	0.000294606	yes	2.46567	Yes
YMR250W	YMR250W	YMR250W	.	.	XIII:770800-772558	WT	ksp1-KD	OK	78.1845	192.663	1.30112	6.30608	5e-05	0.000294606	yes	2.4642	Yes
YIL099W	YIL099W	YIL099W	.	.	IX:178003-179653	WT	ksp1-KD	OK	8.39521	20.6859	1.30101	6.10626	5e-05	0.000294606	yes	2.46401	Yes
YHR126C	YHR126C	YHR126C	.	.	VIII:359701-360181	WT	ksp1-KD	OK	0.73596	1.80893	1.29743	2.45604	0.002	0.00776	yes	2.45791	Yes
YLR070C	YLR070C	YLR070C	.	.	XII:274140-275211	WT	ksp1-KD	OK	17.0294	41.8542	1.29734	6.56371	5e-05	0.000294606	yes	2.45775	Yes
YKR009C	YKR009C	YKR009C	.	.	XI:454351-457054	WT	ksp1-KD	OK	7.78119	19.0501	1.29173	6.3986	5e-05	0.000294606	yes	2.44821	Yes
YGL015C	YGL015C	YGL015C	.	.	VII:465042-465435	WT	ksp1-KD	OK	2.94854	7.17575	1.28313	2.73058	5e-05	0.000294606	yes	2.43366	Yes
YOL131W	YOL131W	YOL131W	.	.	XV:73030-73357	WT	ksp1-KD	OK	36.4252	88.5494	1.28154	5.29081	5e-05	0.000294606	yes	2.43098	Yes
YMR120C	YMR120C	YMR120C	.	.	XIII:507501-509280	WT	ksp1-KD	OK	140.516	340.994	1.27901	4.96991	5e-05	0.000294606	yes	2.42672	Yes
YNL202W	YNL202W	YNL202W	.	.	XIV:259438-260456	WT	ksp1-KD	OK	17.9701	43.591	1.27843	7.98682	5e-05	0.000294606	yes	2.42575	Yes
YOR201C	YOR201C	YOR201C	.	.	XV:720180-721708	WT	ksp1-KD	OK	52.7381	127.592	1.27462	5.77721	5e-05	0.000294606	yes	2.41935	Yes
YER091C	YER091C	YER091C	.	.	V:339863-342167	WT	ksp1-KD	OK	422.237	1020.06	1.27253	4.11492	5e-05	0.000294606	yes	2.41585	Yes
YBL102W	YBL102W	YBL102W	.	.	II:24097-24745	WT	ksp1-KD	OK	47.5569	114.829	1.27176	13.9271	5e-05	0.000294606	yes	2.41456	Yes
YIL111W	YIL111W	YIL111W	.	.	IX:155310-155765	WT	ksp1-KD	OK	107.311	258.78	1.26993	7.74568	5e-05	0.000294606	yes	2.4115	Yes
YIL102C	YIL102C	YIL102C	.	.	IX:174581-174887	WT	ksp1-KD	OK	6.03372	14.5499	1.26989	2.76725	5e-05	0.000294606	yes	2.41143	Yes
YDR525W	YDR525W	YDR525W	.	.	IV:1489870-1490234	WT	ksp1-KD	OK	0.976865	2.35449	1.26918	1.75566	0.00445	0.0152374	yes	2.41025	Yes
YEL071W	YEL071W	YEL071W	.	.	V:16354-17845	WT	ksp1-KD	OK	62.4856	150.406	1.26727	7.58012	5e-05	0.000294606	yes	2.40706	Yes
YOL126C	YOL126C	YOL126C	.	.	XV:81786-82920	WT	ksp1-KD	OK	169.472	406.573	1.26247	4.59553	5e-05	0.000294606	yes	2.39906	Yes
YBR218C	YBR218C	YBR218C	.	.	II:658706-662249	WT	ksp1-KD	OK	82.4303	197.727	1.26226	4.64062	5e-05	0.000294606	yes	2.39871	Yes
YGR201C	YGR201C	YGR201C	.	.	VII:902519-903197	WT	ksp1-KD	OK	77.64	186.137	1.2615	6.69808	5e-05	0.000294606	yes	2.39745	Yes
YHL045W	YHL045W	YHL045W	.	.	VIII:12501-12849	WT	ksp1-KD	OK	7.62027	18.1812	1.25453	3.85712	5e-05	0.000294606	yes	2.38589	Yes
YHL016C	YHL016C	YHL016C	.	.	VIII:72036-74244	WT	ksp1-KD	OK	163.539	390.106	1.25423	4.01161	5e-05	0.000294606	yes	2.3854	Yes
YGL148W	YGL148W	YGL148W	.	.	VII:226398-227529	WT	ksp1-KD	OK	219.609	521.854	1.24871	4.68108	5e-05	0.000294606	yes	2.37629	Yes
YGL258W-A	YGL258W-A	YGL258W-A	.	.	VII:9161-9395	WT	ksp1-KD	OK	22.1116	52.5005	1.24753	4.61471	0.00015	0.000804996	yes	2.37435	Yes
YDR037W	YDR037W	YDR037W	.	.	IV:525439-527215	WT	ksp1-KD	OK	110.311	260.818	1.24146	5.35586	5e-05	0.000294606	yes	2.36438	Yes
YMR056C	YMR056C	YMR056C	.	.	XIII:387314-388244	WT	ksp1-KD	OK	46.4498	109.611	1.23864	6.1514	5e-05	0.000294606	yes	2.35976	Yes
snR35	snR35	snR35	.	.	XV:759325-759529	WT	ksp1-KD	OK	51.4061	120.999	1.23498	3.61242	5e-05	0.000294606	yes	2.35378	Yes
YDL170W	YDL170W	YDL170W	.	.	IV:156317-157904	WT	ksp1-KD	OK	86.0565	202.503	1.23459	6.08442	5e-05	0.000294606	yes	2.35314	Yes
YGL018C	YGL018C	YGL018C	.	.	VII:459109-459664	WT	ksp1-KD	OK	32.8439	76.9957	1.22915	10.8199	5e-05	0.000294606	yes	2.34429	Yes
YPL058C	YPL058C	YPL058C	.	.	XVI:445841-450377	WT	ksp1-KD	OK	21.2916	49.8862	1.22836	5.18844	5e-05	0.000294606	yes	2.343	Yes
YER128W	YER128W	YER128W	.	.	V:415858-416470	WT	ksp1-KD	OK	64.8699	151.935	1.22784	5.75351	5e-05	0.000294606	yes	2.34216	Yes
YHR095W	YHR095W	YHR095W	.	.	VIII:292942-293437	WT	ksp1-KD	OK	0.904409	2.11139	1.22315	3.39299	0.0032	0.0114899	yes	2.33456	Yes
YGL154C	YGL154C	YGL154C	.	.	VII:215277-216096	WT	ksp1-KD	OK	56.8108	132.611	1.22297	6.19445	5e-05	0.000294606	yes	2.33427	Yes
YMR159C	YMR159C	YMR159C	.	.	XIII:574470-574928	WT	ksp1-KD	OK	35.3864	82.5301	1.22173	7.22348	5e-05	0.000294606	yes	2.33226	Yes
YLR355C	YLR355C	YLR355C	.	.	XII:838065-839253	WT	ksp1-KD	OK	749.822	1748.47	1.22147	4.90807	5e-05	0.000294606	yes	2.33184	Yes
YDR492W	YDR492W	YDR492W	.	.	IV:1434499-1435874	WT	ksp1-KD	OK	131.794	306.642	1.21827	5.34869	5e-05	0.000294606	yes	2.32668	Yes
YOR226C	YOR226C	YOR226C	.	.	XV:761391-762084	WT	ksp1-KD	OK	27.2573	63.4057	1.21797	19.8059	5e-05	0.000294606	yes	2.32619	Yes
YDR234W	YDR234W	YDR234W	.	.	IV:931128-933210	WT	ksp1-KD	OK	100.628	233.978	1.21734	4.32787	5e-05	0.000294606	yes	2.32518	Yes
YOR235W	YOR235W	YOR235W	.	.	XV:779869-780596	WT	ksp1-KD	OK	7.87291	18.3045	1.21723	3.96865	0.0031	0.0111927	yes	2.325	Yes
YPR160W	YPR160W	YPR160W	.	.	XVI:861305-864014	WT	ksp1-KD	OK	95.5374	221.944	1.21606	4.17673	5e-05	0.000294606	yes	2.32311	Yes
YER053C-A	YER053C-A	YER053C-A	.	.	V:260932-261046	WT	ksp1-KD	OK	1519.7	3530.41	1.21605	7.71413	5e-05	0.000294606	yes	2.3231	Yes
YOR020C	YOR020C	YOR020C	.	.	XV:370523-370844	WT	ksp1-KD	OK	809.826	1881.02	1.21583	7.02581	5e-05	0.000294606	yes	2.32274	Yes
YKR036C	YKR036C	YKR036C	.	.	XI:508701-510633	WT	ksp1-KD	OK	17.1296	39.7498	1.21446	5.88178	5e-05	0.000294606	yes	2.32054	Yes
YGR248W	YGR248W	YGR248W	.	.	VII:985971-986739	WT	ksp1-KD	OK	41.2087	95.6204	1.21437	6.06359	5e-05	0.000294606	yes	2.32039	Yes
YGL259W	YGL259W	YGL259W	.	.	VII:8469-8967	WT	ksp1-KD	OK	5.98516	13.865	1.21198	3.98648	5e-05	0.000294606	yes	2.31655	Yes
YDR186C	YDR186C	YDR186C	.	.	IV:832858-835492	WT	ksp1-KD	OK	51.0305	117.432	1.20239	5.0494	5e-05	0.000294606	yes	2.30121	Yes
YNR073C	YNR073C	YNR073C	.	.	XIV:774791-776300	WT	ksp1-KD	OK	0.178708	0.410144	1.19852	1.9951	0.00105	0.0044806	yes	2.29504	Yes
YJL153C	YJL153C	YJL153C	.	.	X:134331-135933	WT	ksp1-KD	OK	18.0463	41.3457	1.19604	5.20694	5e-05	0.000294606	yes	2.2911	Yes
YJL038C	YJL038C	YJL038C	.	.	X:375114-375774	WT	ksp1-KD	OK	11.3694	26.0453	1.19586	4.97543	5e-05	0.000294606	yes	2.29081	Yes
YDL214C	YDL214C	YDL214C	.	.	IV:74445-76545	WT	ksp1-KD	OK	8.88003	20.2924	1.19231	5.1866	5e-05	0.000294606	yes	2.28518	Yes
YNL311C	YNL311C	YNL311C	.	.	XIV:49396-51688	WT	ksp1-KD	OK	36.8738	84.2377	1.19187	5.21741	5e-05	0.000294606	yes	2.28449	Yes
YJR155W	YJR155W	YJR155W	.	.	X:727404-728271	WT	ksp1-KD	OK	40.2863	91.8265	1.18862	5.44912	5e-05	0.000294606	yes	2.27935	Yes
YKL096C-B	YKL096C-B	YKL096C-B	.	.	XI:259072-259222	WT	ksp1-KD	OK	94.701	215.505	1.18627	3.04957	0.00055	0.00257711	yes	2.27564	Yes
YPR015C	YPR015C	YPR015C	.	.	XVI:590282-591026	WT	ksp1-KD	OK	2.49797	5.68386	1.18611	4.42392	5e-05	0.000294606	yes	2.27538	Yes
YBR201C-A	YBR201C-A	YBR201C-A	.	.	II:624492-624696	WT	ksp1-KD	OK	413.432	939.863	1.1848	4.92991	5e-05	0.000294606	yes	2.27332	Yes
YLR027C	YLR027C	YLR027C	.	.	XII:196828-198085	WT	ksp1-KD	OK	282.833	640.221	1.17862	4.04863	5e-05	0.000294606	yes	2.2636	Yes
YGR096W	YGR096W	YGR096W	.	.	VII:676620-677565	WT	ksp1-KD	OK	27.3382	61.4934	1.16951	5.7235	5e-05	0.000294606	yes	2.24935	Yes
YCL027W	YCL027W	YCL027W	.	.	III:71802-73341	WT	ksp1-KD	OK	3.16844	7.10997	1.16607	5.7956	5e-05	0.000294606	yes	2.244	Yes
YOR184W	YOR184W	YOR184W	.	.	XV:679356-680544	WT	ksp1-KD	OK	171.731	385.051	1.1649	4.48034	5e-05	0.000294606	yes	2.24218	Yes
YGL121C	YGL121C	YGL121C	.	.	VII:280776-281157	WT	ksp1-KD	OK	252.649	566.368	1.16461	5.61549	5e-05	0.000294606	yes	2.24173	Yes
YBR035C	YBR035C	YBR035C	.	.	II:306268-306955	WT	ksp1-KD	OK	318.211	711.836	1.16156	5.10826	5e-05	0.000294606	yes	2.23699	Yes
YFR049W	YFR049W	YFR049W	.	.	VI:248522-248894	WT	ksp1-KD	OK	261.148	582.054	1.15629	6.84518	5e-05	0.000294606	yes	2.22884	Yes
YLR053C	YLR053C	YLR053C	.	.	XII:248099-248426	WT	ksp1-KD	OK	642.555	1430.4	1.15452	9.3448	5e-05	0.000294606	yes	2.2261	Yes
YPR058W	YPR058W	YPR058W	.	.	XVI:673750-674700	WT	ksp1-KD	OK	228.447	507.607	1.15185	3.76533	5e-05	0.000294606	yes	2.22199	Yes
YPL230W	YPL230W	YPL230W	.	.	XVI:115311-116487	WT	ksp1-KD	OK	11.3706	25.1664	1.14619	5.84834	5e-05	0.000294606	yes	2.21329	Yes
YHR029C	YHR029C	YHR029C	.	.	VIII:167676-168561	WT	ksp1-KD	OK	1207.03	2671.02	1.14592	3.63216	5e-05	0.000294606	yes	2.21287	Yes
YJR108W	YJR108W	YJR108W	.	.	X:628711-629083	WT	ksp1-KD	OK	3.57851	7.89794	1.14212	2.35607	0.0001	0.000557854	yes	2.20705	Yes
YBL016W	YBL016W	YBL016W	.	.	II:192450-193512	WT	ksp1-KD	OK	1.47384	3.25186	1.14169	2.90466	5e-05	0.000294606	yes	2.20639	Yes
YER181C	YER181C	YER181C	.	.	V:551472-551796	WT	ksp1-KD	OK	2.16569	4.77798	1.14158	1.94458	0.00325	0.0116373	yes	2.20623	Yes
YNL036W	YNL036W	YNL036W	.	.	XIV:559813-560479	WT	ksp1-KD	OK	716.377	1577.65	1.13899	4.22297	5e-05	0.000294606	yes	2.20227	Yes
YNL162W-A	YNL162W-A	YNL162W-A	.	.	XIV:330328-330547	WT	ksp1-KD	OK	127.822	280.518	1.13396	3.98747	5e-05	0.000294606	yes	2.1946	Yes
YFL028C	YFL028C	YFL028C	.	.	VI:79343-80213	WT	ksp1-KD	OK	238.106	521.147	1.13009	6.24455	5e-05	0.000294606	yes	2.18872	Yes
YGL180W	YGL180W	YGL180W	.	.	VII:160064-162758	WT	ksp1-KD	OK	39.1123	85.5731	1.12953	4.8986	5e-05	0.000294606	yes	2.18787	Yes
YMR118C	YMR118C	YMR118C	.	.	XIII:502143-502734	WT	ksp1-KD	OK	17.9482	39.2309	1.12815	4.09219	5e-05	0.000294606	yes	2.18578	Yes
YPL177C	YPL177C	YPL177C	.	.	XVI:213041-213962	WT	ksp1-KD	OK	81.2333	177.462	1.12736	6.37655	5e-05	0.000294606	yes	2.18459	Yes
YGR110W	YGR110W	YGR110W	.	.	VII:713708-715046	WT	ksp1-KD	OK	39.2252	85.5339	1.12472	5.31507	5e-05	0.000294606	yes	2.18059	Yes
YBR046C	YBR046C	YBR046C	.	.	II:330506-331511	WT	ksp1-KD	OK	60.2504	131.185	1.12256	5.36319	5e-05	0.000294606	yes	2.17733	Yes
YGL081W	YGL081W	YGL081W	.	.	VII:357376-358339	WT	ksp1-KD	OK	4.39535	9.54977	1.11949	3.83206	5e-05	0.000294606	yes	2.1727	Yes
YHR047C	YHR047C	YHR047C	.	.	VIII:198739-201310	WT	ksp1-KD	OK	12.4969	27.1518	1.11948	5.61537	5e-05	0.000294606	yes	2.17269	Yes
YNR056C	YNR056C	YNR056C	.	.	XIV:731617-733303	WT	ksp1-KD	OK	8.07378	17.5248	1.11808	4.53522	5e-05	0.000294606	yes	2.17058	Yes
YPL120W	YPL120W	YPL120W	.	.	XVI:322070-323744	WT	ksp1-KD	OK	16.4997	35.8092	1.11789	5.29176	5e-05	0.000294606	yes	2.17029	Yes
YOL059W	YOL059W	YOL059W	.	.	XV:217125-218448	WT	ksp1-KD	OK	267.502	579.816	1.11605	5.75881	5e-05	0.000294606	yes	2.16753	Yes
YHL044W	YHL044W	YHL044W	.	.	VIII:13564-14272	WT	ksp1-KD	OK	18.4223	39.6917	1.10738	4.52398	5e-05	0.000294606	yes	2.15454	Yes
YPL188W	YPL188W	YPL188W	.	.	XVI:191405-192650	WT	ksp1-KD	OK	63.3181	136.14	1.1044	5.21818	5e-05	0.000294606	yes	2.15009	Yes
YGL223C	YGL223C	YGL223C	.	.	VII:79111-80365	WT	ksp1-KD	OK	45.7816	97.9569	1.09738	5.26391	5e-05	0.000294606	yes	2.13966	Yes
YJR153W	YJR153W	YJR153W	.	.	X:722814-723900	WT	ksp1-KD	OK	9.53983	20.4026	1.09671	4.15123	5e-05	0.000294606	yes	2.13866	Yes
YEL046C	YEL046C	YEL046C	.	.	V:67628-68792	WT	ksp1-KD	OK	486.638	1040.58	1.09646	3.61234	5e-05	0.000294606	yes	2.13829	Yes
YLR080W	YLR080W	YLR080W	.	.	XII:287915-289250	WT	ksp1-KD	OK	53.2967	113.722	1.09339	9.31619	5e-05	0.000294606	yes	2.13375	Yes
YLR250W	YLR250W	YLR250W	.	.	XII:640316-641021	WT	ksp1-KD	OK	201.534	428.847	1.08944	6.96226	5e-05	0.000294606	yes	2.12791	Yes
YHR125W	YHR125W	YHR125W	.	.	VIII:358857-359163	WT	ksp1-KD	OK	7.40574	15.7411	1.08782	2.4096	5e-05	0.000294606	yes	2.12553	Yes
YIL061C	YIL061C	YIL061C	.	.	IX:244656-245559	WT	ksp1-KD	OK	20.4089	43.3327	1.08626	5.2788	5e-05	0.000294606	yes	2.12323	Yes
YPR002W	YPR002W	YPR002W	.	.	XVI:558384-559935	WT	ksp1-KD	OK	16.1491	34.2492	1.08461	4.94667	5e-05	0.000294606	yes	2.1208	Yes
YBR144C	YBR144C	YBR144C	.	.	II:533234-533549	WT	ksp1-KD	OK	2.05852	4.36396	1.08403	2.11709	0.0083	0.0256133	yes	2.11995	Yes
YGR087C	YGR087C	YGR087C	.	.	VII:651289-652981	WT	ksp1-KD	OK	84.3007	178.514	1.08242	3.96992	5e-05	0.000294606	yes	2.11759	Yes
YPR059C	YPR059C	YPR059C	.	.	XVI:673750-674700	WT	ksp1-KD	OK	644.563	1364.89	1.08239	4.32568	5e-05	0.000294606	yes	2.11754	Yes
YER039C-A	YER039C-A	YER039C-A	.	.	V:229262-229481	WT	ksp1-KD	OK	45.0293	95.3269	1.08202	3.04121	5e-05	0.000294606	yes	2.117	Yes
YER061C	YER061C	YER061C	.	.	V:278297-279626	WT	ksp1-KD	OK	55.5274	117.513	1.08155	5.55388	5e-05	0.000294606	yes	2.11631	Yes
YLR211C	YLR211C	YLR211C	.	.	XII:563791-564531	WT	ksp1-KD	OK	61.8961	130.825	1.07972	4.9561	5e-05	0.000294606	yes	2.11363	Yes
YMR189W	YMR189W	YMR189W	.	.	XIII:637499-640604	WT	ksp1-KD	OK	81.3474	171.444	1.07557	3.89365	5e-05	0.000294606	yes	2.10755	Yes
YGL007C-A	YGL007C-A	YGL007C-A	.	.	VII:482940-483027	WT	ksp1-KD	OK	45.2508	95.1798	1.07271	1.6758	0.0157	0.0435672	yes	2.10338	Yes
YPR001W	YPR001W	YPR001W	.	.	XVI:556376-557837	WT	ksp1-KD	OK	4.44612	9.34178	1.07115	3.61725	5e-05	0.000294606	yes	2.10111	Yes
YDR242W	YDR242W	YDR242W	.	.	IV:946806-948456	WT	ksp1-KD	OK	199.932	419.372	1.06872	4.06268	5e-05	0.000294606	yes	2.09757	Yes
YLR271W	YLR271W	YLR271W	.	.	XII:682736-683561	WT	ksp1-KD	OK	55.2014	115.559	1.06585	6.29761	5e-05	0.000294606	yes	2.0934	Yes
YBL103C	YBL103C	YBL103C	.	.	II:22075-23536	WT	ksp1-KD	OK	36.7607	76.7648	1.06228	4.99823	5e-05	0.000294606	yes	2.08823	Yes
YER040W	YER040W	YER040W	.	.	V:229794-231987	WT	ksp1-KD	OK	14.1394	29.5221	1.06207	5.96961	5e-05	0.000294606	yes	2.08793	Yes
YNL180C	YNL180C	YNL180C	.	.	XIV:299653-300649	WT	ksp1-KD	OK	298.668	622.676	1.05994	3.86837	5e-05	0.000294606	yes	2.08484	Yes
YOR134W	YOR134W	YOR134W	.	.	XV:578563-579793	WT	ksp1-KD	OK	31.103	64.7992	1.05892	6.31017	5e-05	0.000294606	yes	2.08337	Yes
YGR146C	YGR146C	YGR146C	.	.	VII:784222-784858	WT	ksp1-KD	OK	31.1845	64.9177	1.05778	5.54714	5e-05	0.000294606	yes	2.08173	Yes
YLR031W	YLR031W	YLR031W	.	.	XII:204224-204785	WT	ksp1-KD	OK	3.80061	7.91141	1.05771	3.91771	5e-05	0.000294606	yes	2.08162	Yes
YCL048W	YCL048W	YCL048W	.	.	III:42164-43556	WT	ksp1-KD	OK	2.67948	5.57522	1.05708	3.66316	5e-05	0.000294606	yes	2.08072	Yes
YMR323W	YMR323W	YMR323W	.	.	XIII:920087-921401	WT	ksp1-KD	OK	1.21324	2.52315	1.05636	2.88061	5e-05	0.000294606	yes	2.07968	Yes
YHR139C-A	YHR139C-A	YHR139C-A	.	.	VIII:380107-380419	WT	ksp1-KD	OK	3.06514	6.36806	1.0549	2.98324	0.0017	0.00674088	yes	2.07757	Yes
YML118W	YML118W	YML118W	.	.	XIII:32333-33851	WT	ksp1-KD	OK	5.6223	11.68	1.05481	3.75172	5e-05	0.000294606	yes	2.07744	Yes
YBR250W	YBR250W	YBR250W	.	.	II:719032-720604	WT	ksp1-KD	OK	2.28987	4.74544	1.05128	3.95889	5e-05	0.000294606	yes	2.07237	Yes
YIL056W	YIL056W	YIL056W	.	.	IX:249990-251913	WT	ksp1-KD	OK	51.6305	106.885	1.04977	4.39665	5e-05	0.000294606	yes	2.0702	Yes
YML130C	YML130C	YML130C	.	.	XIII:11482-13174	WT	ksp1-KD	OK	75.575	156.438	1.04961	4.33406	5e-05	0.000294606	yes	2.06997	Yes
YMR194C-B	YMR194C-B	YMR194C-B	.	.	XIII:652593-652887	WT	ksp1-KD	OK	92.249	190.938	1.0495	4.10593	5e-05	0.000294606	yes	2.06981	Yes
YML097C	YML097C	YML097C	.	.	XIII:78334-79690	WT	ksp1-KD	OK	40.2785	83.2314	1.04712	5.56769	5e-05	0.000294606	yes	2.0664	Yes
YKL055C	YKL055C	YKL055C	.	.	XI:335320-336157	WT	ksp1-KD	OK	7.46904	15.4045	1.04436	3.84972	5e-05	0.000294606	yes	2.06245	Yes
YDL184C	YDL184C	YDL184C	.	.	IV:130406-130484	WT	ksp1-KD	OK	1323	2727.22	1.04362	3.49243	0.00025	0.00126538	yes	2.06139	Yes
YKL026C	YKL026C	YKL026C	.	.	XI:389379-389883	WT	ksp1-KD	OK	41.0539	84.6069	1.04326	28.2045	5e-05	0.000294606	yes	2.06088	Yes
YLR111W	YLR111W	YLR111W	.	.	XII:370390-370723	WT	ksp1-KD	OK	0.880991	1.81476	1.04258	1.68177	0.0078	0.0243245	yes	2.05991	Yes
YLR178C	YLR178C	YLR178C	.	.	XII:513161-513821	WT	ksp1-KD	OK	292.358	601.761	1.04145	4.15193	5e-05	0.000294606	yes	2.0583	Yes
YHL022C	YHL022C	YHL022C	.	.	VIII:62960-64157	WT	ksp1-KD	OK	2.80136	5.76576	1.04139	3.86128	5e-05	0.000294606	yes	2.05821	Yes
YFL019C	YFL019C	YFL019C	.	.	VI:100251-100605	WT	ksp1-KD	OK	7.51016	15.435	1.03929	3.99888	5e-05	0.000294606	yes	2.05522	Yes
YDR533C	YDR533C	YDR533C	.	.	IV:1501446-1502160	WT	ksp1-KD	OK	144.816	297.626	1.03928	4.55934	5e-05	0.000294606	yes	2.0552	Yes
YDR163W	YDR163W	YDR163W	.	.	IV:781422-781950	WT	ksp1-KD	OK	130.551	267.386	1.03431	6.09717	5e-05	0.000294606	yes	2.04813	Yes
YBR213W	YBR213W	YBR213W	.	.	II:650367-651192	WT	ksp1-KD	OK	20.0008	40.9215	1.0328	4.15294	5e-05	0.000294606	yes	2.04599	Yes
YBR197C	YBR197C	YBR197C	.	.	II:615202-615856	WT	ksp1-KD	OK	67.468	137.821	1.03052	5.19144	5e-05	0.000294606	yes	2.04276	Yes
YNL195C	YNL195C	YNL195C	.	.	XIV:271522-272308	WT	ksp1-KD	OK	7.33018	14.9603	1.02922	3.53368	5e-05	0.000294606	yes	2.04092	Yes
YHR021W-A	YHR021W-A	YHR021W-A	.	.	VIII:149224-150345	WT	ksp1-KD	OK	2.30419	4.68393	1.02346	1.94804	0.0021	0.00808046	yes	2.03279	Yes
YLR164W	YLR164W	YLR164W	.	.	XII:493882-494389	WT	ksp1-KD	OK	49.0685	99.5051	1.01997	4.69963	5e-05	0.000294606	yes	2.02788	Yes
snR57	snR57	snR57	.	.	XII:794936-795024	WT	ksp1-KD	OK	481.251	974.569	1.01798	2.11641	0.0043	0.0148332	yes	2.02508	Yes
YJR122W	YJR122W	YJR122W	.	.	X:649775-651269	WT	ksp1-KD	OK	13.1689	26.6083	1.01474	4.68956	5e-05	0.000294606	yes	2.02054	Yes
YFL055W	YFL055W	YFL055W	.	.	VI:17003-18680	WT	ksp1-KD	OK	12.7653	25.7331	1.01139	5.55683	5e-05	0.000294606	yes	2.01585	Yes
YNL057W	YNL057W	YNL057W	.	.	XIV:515762-516735	WT	ksp1-KD	OK	172.951	347.066	1.00485	4.13141	5e-05	0.000294606	yes	2.00673	Yes
YNL124W	YNL124W	YNL124W	.	.	XIV:392891-394370	WT	ksp1-KD	OK	36.0256	72.0786	1.00055	5.43647	5e-05	0.000294606	yes	2.00076	Yes
YPR172W	YPR172W	YPR172W	.	.	XVI:885795-886398	WT	ksp1-KD	OK	68.391	136.805	1.00024	4.82192	5e-05	0.000294606	yes	2.00033	Yes
YJR010C-A	YJR010C-A	YJR010C-A	.	.	X:458076-458361	WT	ksp1-KD	OK	109.796	219.504	0.999424	5.65517	5e-05	0.000294606	yes	1.9992	Yes
YHR137W	YHR137W	YHR137W	.	.	VIII:375708-377250	WT	ksp1-KD	OK	4.85379	9.6722	0.994732	3.20287	5e-05	0.000294606	yes	1.99271	Yes
YCL012C	YCL012C	YCL012C	.	.	III:101316-101788	WT	ksp1-KD	OK	47.9404	95.4725	0.993843	7.90617	5e-05	0.000294606	yes	1.99148	Yes
YLL041C	YLL041C	YLL041C	.	.	XII:53130-53931	WT	ksp1-KD	OK	300.886	598.29	0.991628	4.33753	5e-05	0.000294606	yes	1.98843	Yes
YGL033W	YGL033W	YGL033W	.	.	VII:435624-436401	WT	ksp1-KD	OK	2.40949	4.78913	0.991038	2.35698	0.00025	0.00126538	yes	1.98761	Yes
YDR461C-A	YDR461C-A	YDR461C-A	.	.	IV:1385523-1385766	WT	ksp1-KD	OK	246.633	489.846	0.989963	5.07004	5e-05	0.000294606	yes	1.98613	Yes
YNL133C	YNL133C	YNL133C	.	.	XIV:374170-374692	WT	ksp1-KD	OK	176.514	350.365	0.989078	12.4354	5e-05	0.000294606	yes	1.98492	Yes
YLR237W	YLR237W	YLR237W	.	.	XII:612366-614163	WT	ksp1-KD	OK	65.8228	130.505	0.98745	4.78905	5e-05	0.000294606	yes	1.98268	Yes
YJL133C-A	YJL133C-A	YJL133C-A	.	.	X:159622-159847	WT	ksp1-KD	OK	291.419	576.909	0.985248	4.86282	5e-05	0.000294606	yes	1.97965	Yes
YJR097W	YJR097W	YJR097W	.	.	X:612412-612931	WT	ksp1-KD	OK	67.1941	132.802	0.982874	6.0648	5e-05	0.000294606	yes	1.9764	Yes
YIL152W	YIL152W	YIL152W	.	.	IX:56544-57252	WT	ksp1-KD	OK	25.3944	50.1832	0.982693	4.89429	5e-05	0.000294606	yes	1.97615	Yes
YOL027C	YOL027C	YOL027C	.	.	XV:272002-273724	WT	ksp1-KD	OK	54.9263	108.493	0.982038	6.39345	5e-05	0.000294606	yes	1.97525	Yes
YOL162W	YOL162W	YOL162W	.	.	XV:10118-10766	WT	ksp1-KD	OK	25.5305	50.3441	0.979602	8.30771	5e-05	0.000294606	yes	1.97192	Yes
YEL059W	YEL059W	YEL059W	.	.	V:42651-42960	WT	ksp1-KD	OK	14.1251	27.8264	0.978189	19.2862	5e-05	0.000294606	yes	1.96999	Yes
YFR047C	YFR047C	YFR047C	.	.	VI:244278-245166	WT	ksp1-KD	OK	487.456	958.911	0.976125	10.0614	5e-05	0.000294606	yes	1.96717	Yes
YDL059C	YDL059C	YDL059C	.	.	IV:344236-344953	WT	ksp1-KD	OK	43.5325	85.6251	0.975941	4.44393	5e-05	0.000294606	yes	1.96692	Yes
YPL212C	YPL212C	YPL212C	.	.	XVI:151514-153149	WT	ksp1-KD	OK	51.8611	101.852	0.973747	9.03015	5e-05	0.000294606	yes	1.96393	Yes
YGR155W	YGR155W	YGR155W	.	.	VII:798542-800066	WT	ksp1-KD	OK	378.068	742.026	0.972825	3.34888	5e-05	0.000294606	yes	1.96268	Yes
YOL118C	YOL118C	YOL118C	.	.	XV:96607-96916	WT	ksp1-KD	OK	13.0025	25.43	0.96774	2.7996	0.0001	0.000557854	yes	1.95577	Yes
YDL215C	YDL215C	YDL215C	.	.	IV:70639-73918	WT	ksp1-KD	OK	165.353	323.135	0.966591	3.09981	5e-05	0.000294606	yes	1.95422	Yes
YPL202C	YPL202C	YPL202C	.	.	XVI:168087-169338	WT	ksp1-KD	OK	37.2096	72.6747	0.96578	8.82134	5e-05	0.000294606	yes	1.95312	Yes
YLL018C-A	YLL018C-A	YLL018C-A	.	.	XII:108675-108972	WT	ksp1-KD	OK	198.937	387.889	0.963336	4.14131	5e-05	0.000294606	yes	1.94981	Yes
YKL133C	YKL133C	YKL133C	.	.	XI:191678-193070	WT	ksp1-KD	OK	15.5317	30.2817	0.963229	5.78508	5e-05	0.000294606	yes	1.94967	Yes
YMR042W	YMR042W	YMR042W	.	.	XIII:352602-353136	WT	ksp1-KD	OK	22.9765	44.7606	0.962074	6.21239	5e-05	0.000294606	yes	1.94811	Yes
YBR244W	YBR244W	YBR244W	.	.	II:707527-708016	WT	ksp1-KD	OK	70.3428	136.991	0.961602	4.30759	5e-05	0.000294606	yes	1.94747	Yes
YOR323C	YOR323C	YOR323C	.	.	XV:921534-922905	WT	ksp1-KD	OK	97.7869	189.793	0.956717	4.04996	5e-05	0.000294606	yes	1.94089	Yes
YBR148W	YBR148W	YBR148W	.	.	II:537875-539705	WT	ksp1-KD	OK	5.74974	11.1555	0.956182	3.69061	5e-05	0.000294606	yes	1.94017	Yes
YBL018C	YBL018C	YBL018C	.	.	II:185997-186474	WT	ksp1-KD	OK	153.665	297.499	0.953097	5.63545	5e-05	0.000294606	yes	1.93602	Yes
YLR193C	YLR193C	YLR193C	.	.	XII:540008-540536	WT	ksp1-KD	OK	78.0717	151.104	0.952668	9.52	5e-05	0.000294606	yes	1.93545	Yes
YDR535C	YDR535C	YDR535C	.	.	IV:1506605-1507362	WT	ksp1-KD	OK	1.37167	2.65139	0.950817	1.97252	0.00085	0.00373758	yes	1.93297	Yes
YIR017W-A	YIR017W-A	YIR017W-A	.	.	IX:383555-384165	WT	ksp1-KD	OK	20.9855	40.5556	0.950505	5.31147	5e-05	0.000294606	yes	1.93255	Yes
YJR010W	YJR010W	YJR010W	.	.	X:456238-457774	WT	ksp1-KD	OK	38.1506	73.6923	0.949808	5.32259	5e-05	0.000294606	yes	1.93162	Yes
YKL096W	YKL096W	YKL096W	.	.	XI:261131-261851	WT	ksp1-KD	OK	12.7893	24.6793	0.948364	3.74433	5e-05	0.000294606	yes	1.92968	Yes
YIL092W	YIL092W	YIL092W	.	.	IX:189065-190967	WT	ksp1-KD	OK	25.3571	48.8632	0.946357	5.59336	5e-05	0.000294606	yes	1.927	Yes
YPR168W	YPR168W	YPR168W	.	.	XVI:878075-878549	WT	ksp1-KD	OK	82.5596	159.086	0.9463	4.57754	5e-05	0.000294606	yes	1.92692	Yes
YDL241W	YDL241W	YDL241W	.	.	IV:20634-21006	WT	ksp1-KD	OK	16.1848	31.1763	0.945807	3.07813	5e-05	0.000294606	yes	1.92627	Yes
YKL001C	YKL001C	YKL001C	.	.	XI:438776-439385	WT	ksp1-KD	OK	172.466	331.242	0.941573	4.17673	5e-05	0.000294606	yes	1.92062	Yes
YNL115C	YNL115C	YNL115C	.	.	XIV:410118-412053	WT	ksp1-KD	OK	36.6129	70.2868	0.940901	6.10469	5e-05	0.000294606	yes	1.91973	Yes
YFL053W	YFL053W	YFL053W	.	.	VI:23422-25198	WT	ksp1-KD	OK	4.34194	8.33218	0.940354	3.32975	5e-05	0.000294606	yes	1.919	Yes
YJL144W	YJL144W	YJL144W	.	.	X:146358-146673	WT	ksp1-KD	OK	234.129	449.065	0.939623	6.32262	5e-05	0.000294606	yes	1.91803	Yes
YGR097W	YGR097W	YGR097W	.	.	VII:678694-682135	WT	ksp1-KD	OK	54.372	104.259	0.939231	3.46172	5e-05	0.000294606	yes	1.91751	Yes
YHR024C	YHR024C	YHR024C	.	.	VIII:157743-159192	WT	ksp1-KD	OK	56.6454	108.517	0.937893	4.37299	5e-05	0.000294606	yes	1.91573	Yes
YDR527W	YDR527W	YDR527W	.	.	IV:1491074-1492413	WT	ksp1-KD	OK	67.7051	129.421	0.934732	5.30569	5e-05	0.000294606	yes	1.91154	Yes
snR11	snR11	snR11	.	.	XIII:652274-652532	WT	ksp1-KD	OK	97.097	185.371	0.932921	3.69706	5e-05	0.000294606	yes	1.90914	Yes
YEL059C-A	YEL059C-A	YEL059C-A	.	.	V:42399-42624	WT	ksp1-KD	OK	167.762	320.062	0.931934	3.53361	5e-05	0.000294606	yes	1.90783	Yes
YER096W	YER096W	YER096W	.	.	V:351697-353236	WT	ksp1-KD	OK	16.2131	30.9048	0.930671	5.05831	5e-05	0.000294606	yes	1.90616	Yes
YJL127W-A	YJL127W-A	YJL127W-A	.	.	X:180193-180310	WT	ksp1-KD	OK	155.678	296.473	0.929338	2.02781	0.0035	0.012423	yes	1.9044	Yes
YHR216W	YHR216W	YHR216W	.	.	VIII:554395-555967	WT	ksp1-KD	OK	33.0061	62.8547	0.929288	4.7201	5e-05	0.000294606	yes	1.90434	Yes
YMR169C	YMR169C	YMR169C	.	.	XIII:599351-600872	WT	ksp1-KD	OK	12.3005	23.4184	0.928932	5.47546	5e-05	0.000294606	yes	1.90387	Yes
YER163C	YER163C	YER163C	.	.	V:503083-503782	WT	ksp1-KD	OK	35.4197	67.4137	0.928489	4.22457	5e-05	0.000294606	yes	1.90328	Yes
YBR262C	YBR262C	YBR262C	.	.	II:735719-736040	WT	ksp1-KD	OK	672.271	1277.84	0.926589	8.88417	5e-05	0.000294606	yes	1.90078	Yes
YCL048W-A	YCL048W-A	YCL048W-A	.	.	III:41487-41727	WT	ksp1-KD	OK	709.325	1347.44	0.925705	7.47252	5e-05	0.000294606	yes	1.89961	Yes
YLL027W	YLL027W	YLL027W	.	.	XII:87402-88155	WT	ksp1-KD	OK	188.525	358.089	0.925561	4.82207	5e-05	0.000294606	yes	1.89942	Yes
YJR073C	YJR073C	YJR073C	.	.	X:572314-572935	WT	ksp1-KD	OK	725.562	1377.35	0.924721	3.72311	5e-05	0.000294606	yes	1.89832	Yes
YJL205C	YJL205C	YJL205C	.	.	X:50138-50443	WT	ksp1-KD	OK	295.982	561.859	0.924698	2.97071	5e-05	0.000294606	yes	1.89829	Yes
YDR133C	YDR133C	YDR133C	.	.	IV:720961-721297	WT	ksp1-KD	OK	3846.45	7300.08	0.924382	7.59717	5e-05	0.000294606	yes	1.89787	Yes
YHR199C-A	YHR199C-A	YHR199C-A	.	.	VIII:498570-498859	WT	ksp1-KD	OK	122.123	231.07	0.919992	3.01854	5e-05	0.000294606	yes	1.8921	Yes
YBR167C	YBR167C	YBR167C	.	.	II:571467-571890	WT	ksp1-KD	OK	76.3133	144.212	0.918186	4.45031	5e-05	0.000294606	yes	1.88974	Yes
YCR020W-B	YCR020W-B	YCR020W-B	.	.	III:155319-155556	WT	ksp1-KD	OK	259.947	490.16	0.915036	3.51258	5e-05	0.000294606	yes	1.88562	Yes
YGR029W	YGR029W	YGR029W	.	.	VII:543552-544205	WT	ksp1-KD	OK	70.9936	133.625	0.912432	12.7324	5e-05	0.000294606	yes	1.88222	Yes
YPL269W	YPL269W	YPL269W	.	.	XVI:33012-34947	WT	ksp1-KD	OK	20.3106	38.2024	0.911428	4.39967	5e-05	0.000294606	yes	1.88091	Yes
YMR195W	YMR195W	YMR195W	.	.	XIII:654033-654417	WT	ksp1-KD	OK	241.237	453.126	0.909462	5.57599	5e-05	0.000294606	yes	1.87834	Yes
YKL097C	YKL097C	YKL097C	.	.	XI:258502-258913	WT	ksp1-KD	OK	1.12132	2.10526	0.908808	6.79028	0.0025	0.00936455	yes	1.87749	Yes
YGL188C-A	YGL188C-A	YGL188C-A	.	.	VII:148823-148964	WT	ksp1-KD	OK	168.514	316.305	0.908448	1.93154	0.00295	0.0107226	yes	1.87703	Yes
YLR239C	YLR239C	YLR239C	.	.	XII:616331-617318	WT	ksp1-KD	OK	28.5372	53.5038	0.906798	4.24173	5e-05	0.000294606	yes	1.87488	Yes
YJL127C-B	YJL127C-B	YJL127C-B	.	.	X:181550-181709	WT	ksp1-KD	OK	787.426	1476.11	0.906584	5.00476	5e-05	0.000294606	yes	1.8746	Yes
YDL025C	YDL025C	YDL025C	.	.	IV:405343-407206	WT	ksp1-KD	OK	21.9515	41.1268	0.905756	6.32407	5e-05	0.000294606	yes	1.87353	Yes
YNL130C	YNL130C	YNL130C	.	.	XIV:379557-380831	WT	ksp1-KD	OK	100.711	188.556	0.904777	3.84454	5e-05	0.000294606	yes	1.87226	Yes
YGR142W	YGR142W	YGR142W	.	.	VII:772453-773686	WT	ksp1-KD	OK	90.0097	168.389	0.903648	4.93702	5e-05	0.000294606	yes	1.87079	Yes
YAR073W	YAR073W	YAR073W	.	.	I:227741-229317	WT	ksp1-KD	OK	2.35149	4.39805	0.903288	2.45009	0.00015	0.000804996	yes	1.87032	Yes
YBR044C	YBR044C	YBR044C	.	.	II:324340-326059	WT	ksp1-KD	OK	23.1294	43.2591	0.903278	4.31158	5e-05	0.000294606	yes	1.87031	Yes
YNL086W	YNL086W	YNL086W	.	.	XIV:466333-466642	WT	ksp1-KD	OK	83.2838	155.758	0.903199	3.52612	5e-05	0.000294606	yes	1.87021	Yes
YHR048W	YHR048W	YHR048W	.	.	VIII:204606-206151	WT	ksp1-KD	OK	22.2344	41.5415	0.901761	4.46596	5e-05	0.000294606	yes	1.86835	Yes
YJR131W	YJR131W	YJR131W	.	.	X:667643-669293	WT	ksp1-KD	OK	24.4016	45.4451	0.897148	4.63768	5e-05	0.000294606	yes	1.86238	Yes
YDR403W	YDR403W	YDR403W	.	.	IV:1274601-1276212	WT	ksp1-KD	OK	3.74658	6.97672	0.896975	3.21798	5e-05	0.000294606	yes	1.86216	Yes
YER184C	YER184C	YER184C	.	.	V:556295-558680	WT	ksp1-KD	OK	14.5452	27.0759	0.896469	4.21588	5e-05	0.000294606	yes	1.8615	Yes
YEL009C-A	YEL009C-A	YEL009C-A	.	.	V:136278-136778	WT	ksp1-KD	OK	1.07395	1.99467	0.893221	1.60152	0.0112	0.0328618	yes	1.85732	Yes
YJR008W	YJR008W	YJR008W	.	.	X:452429-453446	WT	ksp1-KD	OK	93.065	172.794	0.892746	4.03489	5e-05	0.000294606	yes	1.85671	Yes
YDR408C	YDR408C	YDR408C	.	.	IV:1288214-1288859	WT	ksp1-KD	OK	93.575	173.662	0.892087	4.1215	5e-05	0.000294606	yes	1.85586	Yes
YDR040C	YDR040C	YDR040C	.	.	IV:535191-538467	WT	ksp1-KD	OK	4.19989	7.79311	0.891847	3.52924	5e-05	0.000294606	yes	1.85555	Yes
YCL001W-B	YCL001W-B	YCL001W-B	.	.	III:113769-114024	WT	ksp1-KD	OK	67.1342	124.43	0.890216	2.60377	5e-05	0.000294606	yes	1.85345	Yes
YPR149W	YPR149W	YPR149W	.	.	XVI:829917-830439	WT	ksp1-KD	OK	1060.13	1964.41	0.88985	3.93191	5e-05	0.000294606	yes	1.85298	Yes
YLR132C	YLR132C	YLR132C	.	.	XII:407282-408155	WT	ksp1-KD	OK	7.35794	13.6299	0.889403	3.09938	5e-05	0.000294606	yes	1.85241	Yes
YKL068W-A	YKL068W-A	YKL068W-A	.	.	XI:309205-309442	WT	ksp1-KD	OK	299.772	554.62	0.887636	3.96612	5e-05	0.000294606	yes	1.85014	Yes
YJL161W	YJL161W	YJL161W	.	.	X:117244-117787	WT	ksp1-KD	OK	36.9959	68.4277	0.887213	3.99169	5e-05	0.000294606	yes	1.8496	Yes
YGL056C	YGL056C	YGL056C	.	.	VII:396034-397618	WT	ksp1-KD	OK	42.7454	79.0607	0.88719	4.07323	5e-05	0.000294606	yes	1.84957	Yes
YLR364W	YLR364W	YLR364W	.	.	XII:854061-854391	WT	ksp1-KD	OK	65.478	120.82	0.88378	3.64351	5e-05	0.000294606	yes	1.8452	Yes
YPR193C	YPR193C	YPR193C	.	.	XVI:922908-923379	WT	ksp1-KD	OK	276.261	509.555	0.883209	7.63919	5e-05	0.000294606	yes	1.84447	Yes
YDR038C	YDR038C	YDR038C	.	.	IV:527421-530697	WT	ksp1-KD	OK	1.98327	3.65739	0.88293	2.97473	5e-05	0.000294606	yes	1.84412	Yes
YAL062W	YAL062W	YAL062W	.	.	I:31566-32940	WT	ksp1-KD	OK	27.0637	49.8472	0.881155	4.10463	5e-05	0.000294606	yes	1.84185	Yes
YLR226W	YLR226W	YLR226W	.	.	XII:589353-590541	WT	ksp1-KD	OK	28.7594	52.9685	0.881102	6.23737	5e-05	0.000294606	yes	1.84178	Yes
YNL012W	YNL012W	YNL012W	.	.	XIV:609685-611665	WT	ksp1-KD	OK	14.1514	26.056	0.880671	4.14456	5e-05	0.000294606	yes	1.84123	Yes
YER185W	YER185W	YER185W	.	.	V:559453-560365	WT	ksp1-KD	OK	15.0528	27.6831	0.878973	3.46539	5e-05	0.000294606	yes	1.83907	Yes
YKL059C	YKL059C	YKL059C	.	.	XI:328117-329443	WT	ksp1-KD	OK	18.8688	34.6952	0.878738	4.76146	5e-05	0.000294606	yes	1.83877	Yes
YOL048C	YOL048C	YOL048C	.	.	XV:240203-241310	WT	ksp1-KD	OK	57.5154	105.696	0.877906	4.56969	5e-05	0.000294606	yes	1.83771	Yes
YBR241C	YBR241C	YBR241C	.	.	II:702588-704055	WT	ksp1-KD	OK	55.4419	101.736	0.875775	3.88597	5e-05	0.000294606	yes	1.83499	Yes
YKL106W	YKL106W	YKL106W	.	.	XI:237535-238891	WT	ksp1-KD	OK	107.375	196.996	0.875504	4.8995	5e-05	0.000294606	yes	1.83465	Yes
RNA170	RNA170	RNA170	.	.	XIII:667287-667456	WT	ksp1-KD	OK	48.7075	89.3483	0.875298	2.01811	0.00085	0.00373758	yes	1.83439	Yes
YMR196W	YMR196W	YMR196W	.	.	XIII:655075-658342	WT	ksp1-KD	OK	63.1994	115.9	0.874903	3.30147	5e-05	0.000294606	yes	1.83388	Yes
YLR413W	YLR413W	YLR413W	.	.	XII:951155-953183	WT	ksp1-KD	OK	12.1612	22.2934	0.874323	4.42652	5e-05	0.000294606	yes	1.83315	Yes
YJL184W	YJL184W	YJL184W	.	.	X:83447-83819	WT	ksp1-KD	OK	419.214	768.11	0.873627	7.72356	5e-05	0.000294606	yes	1.83226	Yes
YER180C-A	YER180C-A	YER180C-A	.	.	V:550864-551122	WT	ksp1-KD	OK	29.4121	53.7992	0.871173	2.6967	5e-05	0.000294606	yes	1.82915	Yes
YGL186C	YGL186C	YGL186C	.	.	VII:151036-152776	WT	ksp1-KD	OK	117.689	215.186	0.870603	3.57521	5e-05	0.000294606	yes	1.82843	Yes
YMR315W	YMR315W	YMR315W	.	.	XIII:902799-903849	WT	ksp1-KD	OK	351.815	642.842	0.869646	3.34392	5e-05	0.000294606	yes	1.82721	Yes
YIR005W	YIR005W	YIR005W	.	.	IX:364888-365335	WT	ksp1-KD	OK	232.787	425.111	0.86883	5.53375	5e-05	0.000294606	yes	1.82618	Yes
YNL187W	YNL187W	YNL187W	.	.	XIV:287993-289067	WT	ksp1-KD	OK	21.6108	39.4393	0.867883	4.10099	5e-05	0.000294606	yes	1.82498	Yes
YGR025W	YGR025W	YGR025W	.	.	VII:532638-532941	WT	ksp1-KD	OK	2.39773	4.37491	0.867585	1.47707	0.01565	0.0435213	yes	1.82461	Yes
YHR022C	YHR022C	YHR022C	.	.	VIII:149224-150345	WT	ksp1-KD	OK	5.21637	9.51427	0.867048	2.32932	0.00025	0.00126538	yes	1.82393	Yes
YHR163W	YHR163W	YHR163W	.	.	VIII:423723-424473	WT	ksp1-KD	OK	80.7046	147.065	0.865732	4.07342	5e-05	0.000294606	yes	1.82226	Yes
YOR360C	YOR360C	YOR360C	.	.	XV:1013240-1014821	WT	ksp1-KD	OK	83.6155	152.269	0.864778	3.63151	5e-05	0.000294606	yes	1.82106	Yes
YKL151C	YKL151C	YKL151C	.	.	XI:164916-165930	WT	ksp1-KD	OK	372.725	676.38	0.859725	4.92512	5e-05	0.000294606	yes	1.81469	Yes
YDR380W	YDR380W	YDR380W	.	.	IV:1234217-1236125	WT	ksp1-KD	OK	25.1512	45.6402	0.859677	4.04945	5e-05	0.000294606	yes	1.81463	Yes
YDR478W	YDR478W	YDR478W	.	.	IV:1414574-1415171	WT	ksp1-KD	OK	24.5147	44.3573	0.855526	3.26257	5e-05	0.000294606	yes	1.80942	Yes
YDL199C	YDL199C	YDL199C	.	.	IV:101289-103353	WT	ksp1-KD	OK	13.0256	23.5666	0.855394	6.40084	5e-05	0.000294606	yes	1.80925	Yes
YJR112W	YJR112W	YJR112W	.	.	X:637029-637635	WT	ksp1-KD	OK	80.5376	145.693	0.855195	4.80681	5e-05	0.000294606	yes	1.809	Yes
YEL063C	YEL063C	YEL063C	.	.	V:31693-33466	WT	ksp1-KD	OK	232.028	419.601	0.854721	2.81658	5e-05	0.000294606	yes	1.80841	Yes
YBR067C	YBR067C	YBR067C	.	.	II:372102-372735	WT	ksp1-KD	OK	103.04	185.751	0.850168	5.24448	5e-05	0.000294606	yes	1.80271	Yes
YDR230W	YDR230W	YDR230W	.	.	IV:926222-926910	WT	ksp1-KD	OK	10.8152	19.4624	0.84763	3.18333	0.0067	0.0214816	yes	1.79954	Yes
snR31	snR31	snR31	.	.	XV:841957-842182	WT	ksp1-KD	OK	47.6084	85.6257	0.846828	2.43824	5e-05	0.000294606	yes	1.79854	Yes
YGR153W	YGR153W	YGR153W	.	.	VII:796091-796745	WT	ksp1-KD	OK	36.4794	65.5756	0.846079	4.05032	5e-05	0.000294606	yes	1.79761	Yes
YKL138C-A	YKL138C-A	YKL138C-A	.	.	XI:184802-185012	WT	ksp1-KD	OK	322.21	577.52	0.84187	3.22004	5e-05	0.000294606	yes	1.79237	Yes
YHL036W	YHL036W	YHL036W	.	.	VIII:26240-27881	WT	ksp1-KD	OK	44.5671	79.8716	0.841704	4.26567	5e-05	0.000294606	yes	1.79217	Yes
YML076C	YML076C	YML076C	.	.	XIII:112512-115347	WT	ksp1-KD	OK	13.5878	24.3347	0.84071	6.84568	5e-05	0.000294606	yes	1.79093	Yes
YLR063W	YLR063W	YLR063W	.	.	XII:264156-265254	WT	ksp1-KD	OK	17.5273	31.3748	0.840005	3.94327	5e-05	0.000294606	yes	1.79006	Yes
YNL125C	YNL125C	YNL125C	.	.	XIV:390145-392167	WT	ksp1-KD	OK	24.3653	43.5867	0.839058	4.0254	5e-05	0.000294606	yes	1.78888	Yes
YER135C	YER135C	YER135C	.	.	V:437951-438344	WT	ksp1-KD	OK	3.31941	5.92914	0.836895	2.50501	0.0024	0.00903685	yes	1.7862	Yes
YHL042W	YHL042W	YHL042W	.	.	VIII:15666-16119	WT	ksp1-KD	OK	7.87666	14.0678	0.836742	4.63371	5e-05	0.000294606	yes	1.78601	Yes
YER042W	YER042W	YER042W	.	.	V:234936-235491	WT	ksp1-KD	OK	656.26	1171.42	0.835919	4.27656	5e-05	0.000294606	yes	1.78499	Yes
YDR256C	YDR256C	YDR256C	.	.	IV:968132-969680	WT	ksp1-KD	OK	28.6692	51.1713	0.835837	4.12135	5e-05	0.000294606	yes	1.78489	Yes
YBR293W	YBR293W	YBR293W	.	.	II:787005-788430	WT	ksp1-KD	OK	41.7207	74.3716	0.833987	5.88418	5e-05	0.000294606	yes	1.7826	Yes
YOR347C	YOR347C	YOR347C	.	.	XV:984941-986462	WT	ksp1-KD	OK	22.5285	40.1374	0.833192	3.95014	5e-05	0.000294606	yes	1.78162	Yes
YDR341C	YDR341C	YDR341C	.	.	IV:1151802-1153626	WT	ksp1-KD	OK	227.76	405.629	0.832649	2.96957	5e-05	0.000294606	yes	1.78095	Yes
YDR034C	YDR034C	YDR034C	.	.	IV:509736-512109	WT	ksp1-KD	OK	51.4991	91.6156	0.831047	3.47196	5e-05	0.000294606	yes	1.77898	Yes
YAL015C	YAL015C	YAL015C	.	.	I:126902-128102	WT	ksp1-KD	OK	48.8385	86.8184	0.829984	4.58711	5e-05	0.000294606	yes	1.77767	Yes
YIL055C	YIL055C	YIL055C	.	.	IX:252041-253925	WT	ksp1-KD	OK	5.2089	9.25039	0.828536	4.18853	5e-05	0.000294606	yes	1.77588	Yes
YDR009W	YDR009W	YDR009W	.	.	IV:463433-464996	WT	ksp1-KD	OK	4.31229	7.65809	0.828531	3.17767	5e-05	0.000294606	yes	1.77588	Yes
YDR076W	YDR076W	YDR076W	.	.	IV:598467-599688	WT	ksp1-KD	OK	35.2585	62.5934	0.828038	4.25151	5e-05	0.000294606	yes	1.77527	Yes
YPL026C	YPL026C	YPL026C	.	.	XVI:500674-502183	WT	ksp1-KD	OK	63.7485	113.164	0.827952	3.65634	5e-05	0.000294606	yes	1.77516	Yes
YNL009W	YNL009W	YNL009W	.	.	XIV:614820-616083	WT	ksp1-KD	OK	18.925	33.591	0.827782	4.36656	5e-05	0.000294606	yes	1.77495	Yes
YKR014C	YKR014C	YKR014C	.	.	XI:465366-466071	WT	ksp1-KD	OK	253.286	449.153	0.826438	3.9006	5e-05	0.000294606	yes	1.7733	Yes
YPL099C	YPL099C	YPL099C	.	.	XVI:363519-364068	WT	ksp1-KD	OK	58.0868	102.988	0.826187	3.6678	5e-05	0.000294606	yes	1.77299	Yes
YER039C	YER039C	YER039C	.	.	V:228450-229205	WT	ksp1-KD	OK	25.3069	44.8475	0.8255	3.62869	5e-05	0.000294606	yes	1.77215	Yes
YLR327C	YLR327C	YLR327C	.	.	XII:783126-783387	WT	ksp1-KD	OK	3774.34	6686.94	0.825123	3.29497	5e-05	0.000294606	yes	1.77169	Yes
YNL276C	YNL276C	YNL276C	.	.	XIV:117348-118826	WT	ksp1-KD	OK	98.2366	174.012	0.824853	1.82999	0.00325	0.0116373	yes	1.77135	Yes
YGL248W	YGL248W	YGL248W	.	.	VII:35652-36762	WT	ksp1-KD	OK	77.9728	138.051	0.824157	5.03273	5e-05	0.000294606	yes	1.7705	Yes
YOR339C	YOR339C	YOR339C	.	.	XV:958361-958832	WT	ksp1-KD	OK	25.3604	44.8319	0.821946	4.43978	5e-05	0.000294606	yes	1.76779	Yes
YIL102C-A	YIL102C-A	YIL102C-A	.	.	IX:173364-173592	WT	ksp1-KD	OK	62.0853	109.651	0.820602	7.98195	5e-05	0.000294606	yes	1.76614	Yes
YOL156W	YOL156W	YOL156W	.	.	XV:25272-26976	WT	ksp1-KD	OK	2.0841	3.68012	0.820328	3.4999	5e-05	0.000294606	yes	1.76581	Yes
YCR063W	YCR063W	YCR063W	.	.	III:228094-228791	WT	ksp1-KD	OK	23.6197	41.6133	0.817056	3.06453	5e-05	0.000294606	yes	1.76181	Yes
YBL098W	YBL098W	YBL098W	.	.	II:39144-40527	WT	ksp1-KD	OK	47.4687	83.5909	0.81637	3.87438	5e-05	0.000294606	yes	1.76097	Yes
YMR174C	YMR174C	YMR174C	.	.	XIII:610158-610365	WT	ksp1-KD	OK	1266.23	2226.85	0.814461	5.06771	5e-05	0.000294606	yes	1.75864	Yes
YNL274C	YNL274C	YNL274C	.	.	XIV:121117-122170	WT	ksp1-KD	OK	200.593	352.387	0.812894	3.2259	5e-05	0.000294606	yes	1.75673	Yes
YEL069C	YEL069C	YEL069C	.	.	V:21536-23231	WT	ksp1-KD	OK	1.55184	2.72541	0.812499	2.17749	0.00025	0.00126538	yes	1.75625	Yes
YDR055W	YDR055W	YDR055W	.	.	IV:563526-564861	WT	ksp1-KD	OK	141.607	248.65	0.812224	3.37885	5e-05	0.000294606	yes	1.75592	Yes
YIL003W	YIL003W	YIL003W	.	.	IX:349121-350003	WT	ksp1-KD	OK	84.8105	148.788	0.810941	4.19786	5e-05	0.000294606	yes	1.75436	Yes
SRG1	SRG1	SRG1	.	.	V:322211-324095	WT	ksp1-KD	OK	35.6808	62.5922	0.810834	1.49585	0.01245	0.0359771	yes	1.75423	Yes
YGL098W	YGL098W	YGL098W	.	.	VII:317341-318079	WT	ksp1-KD	OK	66.7998	117.175	0.810756	3.99294	5e-05	0.000294606	yes	1.75413	Yes
YMR135C	YMR135C	YMR135C	.	.	XIII:538688-540444	WT	ksp1-KD	OK	44.4973	78.0529	0.810734	3.60978	5e-05	0.000294606	yes	1.7541	Yes
YIL096C	YIL096C	YIL096C	.	.	IX:182116-183127	WT	ksp1-KD	OK	28.8934	50.6528	0.809903	4.46753	5e-05	0.000294606	yes	1.75309	Yes
YFR023W	YFR023W	YFR023W	.	.	VI:199873-201709	WT	ksp1-KD	OK	1.70082	2.98139	0.80976	2.39442	5e-05	0.000294606	yes	1.75292	Yes
YJL213W	YJL213W	YJL213W	.	.	X:32162-33158	WT	ksp1-KD	OK	72.4486	126.774	0.807229	3.82102	5e-05	0.000294606	yes	1.74985	Yes
YJL185C	YJL185C	YJL185C	.	.	X:82094-82976	WT	ksp1-KD	OK	24.452	42.7497	0.80596	3.64749	5e-05	0.000294606	yes	1.74831	Yes
YCR010C	YCR010C	YCR010C	.	.	III:132272-133124	WT	ksp1-KD	OK	6.0269	10.5343	0.805602	2.55577	5e-05	0.000294606	yes	1.74787	Yes
YHR191C	YHR191C	YHR191C	.	.	VIII:486229-486631	WT	ksp1-KD	OK	269.916	470.74	0.802419	7.81422	5e-05	0.000294606	yes	1.74402	Yes
YGR016W	YGR016W	YGR016W	.	.	VII:522260-522833	WT	ksp1-KD	OK	44.3963	77.4027	0.801944	5.29352	5e-05	0.000294606	yes	1.74345	Yes
YOR027W	YOR027W	YOR027W	.	.	XV:381052-382822	WT	ksp1-KD	OK	207.283	360.745	0.799377	2.9423	5e-05	0.000294606	yes	1.74035	Yes
YFR042W	YFR042W	YFR042W	.	.	VI:238457-239060	WT	ksp1-KD	OK	54.6532	95.038	0.798197	3.78437	5e-05	0.000294606	yes	1.73893	Yes
YBR180W	YBR180W	YBR180W	.	.	II:589740-591459	WT	ksp1-KD	OK	1.68693	2.93342	0.798183	2.395	5e-05	0.000294606	yes	1.73891	Yes
YNL116W	YNL116W	YNL116W	.	.	XIV:408340-409909	WT	ksp1-KD	OK	37.0288	64.3467	0.79722	4.80635	5e-05	0.000294606	yes	1.73775	Yes
YLR377C	YLR377C	YLR377C	.	.	XII:873745-874792	WT	ksp1-KD	OK	9.01608	15.6662	0.797087	2.79868	5e-05	0.000294606	yes	1.73759	Yes
YOR334W	YOR334W	YOR334W	.	.	XV:944540-946008	WT	ksp1-KD	OK	15.5049	26.9204	0.795974	4.24714	5e-05	0.000294606	yes	1.73625	Yes
YHR104W	YHR104W	YHR104W	.	.	VIII:323408-324392	WT	ksp1-KD	OK	136.759	236.916	0.792743	3.75396	5e-05	0.000294606	yes	1.73237	Yes
YOR213C	YOR213C	YOR213C	.	.	XV:744534-745281	WT	ksp1-KD	OK	53.6433	92.7608	0.790119	3.85612	5e-05	0.000294606	yes	1.72922	Yes
YOR225W	YOR225W	YOR225W	.	.	XV:761391-762084	WT	ksp1-KD	OK	41.0193	70.8418	0.788297	1.57823	0.0122	0.0353332	yes	1.72703	Yes
YJL105W	YJL105W	YJL105W	.	.	X:225054-226737	WT	ksp1-KD	OK	6.70825	11.5846	0.788195	3.35749	5e-05	0.000294606	yes	1.72691	Yes
YOR114W	YOR114W	YOR114W	.	.	XV:537569-538454	WT	ksp1-KD	OK	14.0369	24.2385	0.788078	3.68217	5e-05	0.000294606	yes	1.72677	Yes
YHR087W	YHR087W	YHR087W	.	.	VIII:280819-281155	WT	ksp1-KD	OK	183.725	317.202	0.787855	4.08834	5e-05	0.000294606	yes	1.72651	Yes
YGR018C	YGR018C	YGR018C	.	.	VII:523786-524694	WT	ksp1-KD	OK	63.6117	109.762	0.787017	2.59968	0.00105	0.0044806	yes	1.7255	Yes
YBR056W	YBR056W	YBR056W	.	.	II:347878-349384	WT	ksp1-KD	OK	92.7154	159.798	0.785372	3.51548	5e-05	0.000294606	yes	1.72354	Yes
YLL009C	YLL009C	YLL009C	.	.	XII:131204-131414	WT	ksp1-KD	OK	469.292	808.745	0.785197	3.84392	5e-05	0.000294606	yes	1.72333	Yes
YIL163C	YIL163C	YIL163C	.	.	IX:36898-37252	WT	ksp1-KD	OK	87.6199	150.762	0.782941	3.6155	5e-05	0.000294606	yes	1.72063	Yes
YMR240C	YMR240C	YMR240C	.	.	XIII:749929-751240	WT	ksp1-KD	OK	33.4745	57.5097	0.780743	3.79842	5e-05	0.000294606	yes	1.71802	Yes
YIL074C	YIL074C	YIL074C	.	.	IX:221080-222490	WT	ksp1-KD	OK	89.9295	154.424	0.780034	3.53288	5e-05	0.000294606	yes	1.71717	Yes
YLR312C	YLR312C	YLR312C	.	.	XII:757636-758833	WT	ksp1-KD	OK	36.463	62.6066	0.779883	4.08814	5e-05	0.000294606	yes	1.71699	Yes
YDR461W	YDR461W	YDR461W	.	.	IV:1385175-1385286	WT	ksp1-KD	OK	298.536	512.238	0.778909	3.51898	0.00375	0.0131808	yes	1.71583	Yes
YBL059C-A	YBL059C-A	YBL059C-A	.	.	II:110124-110539	WT	ksp1-KD	OK	156.917	269.102	0.778154	4.50658	5e-05	0.000294606	yes	1.71494	Yes
RME3	RME3	RME3	.	.	VII:33097-35212	WT	ksp1-KD	OK	9.63163	16.5126	0.777717	3.3866	5e-05	0.000294606	yes	1.71442	Yes
YFR012W	YFR012W	YFR012W	.	.	VI:167887-168496	WT	ksp1-KD	OK	4.14153	7.08963	0.775548	2.14223	0.0003	0.00149174	yes	1.71184	Yes
YNR072W	YNR072W	YNR072W	.	.	XIV:772656-774351	WT	ksp1-KD	OK	0.4661	0.797664	0.775142	1.57355	0.00725	0.0230067	yes	1.71136	Yes
YKR049C	YKR049C	YKR049C	.	.	XI:526829-527231	WT	ksp1-KD	OK	244.847	418.705	0.774053	3.68251	5e-05	0.000294606	yes	1.71007	Yes
YER015W	YER015W	YER015W	.	.	V:182599-186775	WT	ksp1-KD	OK	25.9035	44.2937	0.773953	1.70144	0.005	0.016802	yes	1.70995	Yes
YIL060W	YIL060W	YIL060W	.	.	IX:246391-247198	WT	ksp1-KD	OK	24.683	42.1767	0.772927	2.00305	0.00265	0.00978543	yes	1.70873	Yes
YDL133C-A	YDL133C-A	YDL133C-A	.	.	IV:221723-221801	WT	ksp1-KD	OK	3264.88	5574.85	0.771904	2.94946	0.00075	0.00336852	yes	1.70752	Yes
YKL062W	YKL062W	YKL062W	.	.	XI:323227-325120	WT	ksp1-KD	OK	42.8252	73.113	0.771666	3.59801	5e-05	0.000294606	yes	1.70724	Yes
YPR101W	YPR101W	YPR101W	.	.	XVI:730491-731019	WT	ksp1-KD	OK	198.017	337.987	0.771341	6.83934	5e-05	0.000294606	yes	1.70686	Yes
YDL130W-A	YDL130W-A	YDL130W-A	.	.	IV:229170-229431	WT	ksp1-KD	OK	773.368	1318.2	0.769348	3.89053	5e-05	0.000294606	yes	1.7045	Yes
YNL014W	YNL014W	YNL014W	.	.	XIV:606318-609510	WT	ksp1-KD	OK	12.3506	21.0312	0.767946	3.39725	5e-05	0.000294606	yes	1.70284	Yes
YGL104C	YGL104C	YGL104C	.	.	VII:308712-310173	WT	ksp1-KD	OK	17.0712	28.9924	0.764111	3.35782	5e-05	0.000294606	yes	1.69832	Yes
YNL200C	YNL200C	YNL200C	.	.	XIV:263712-264453	WT	ksp1-KD	OK	122.818	208.465	0.763279	4.5732	5e-05	0.000294606	yes	1.69734	Yes
YAL060W	YAL060W	YAL060W	.	.	I:35154-36303	WT	ksp1-KD	OK	573.221	972.606	0.762764	2.41492	5e-05	0.000294606	yes	1.69674	Yes
YOR062C	YOR062C	YOR062C	.	.	XV:442724-443531	WT	ksp1-KD	OK	48.5762	82.4175	0.762701	3.92275	5e-05	0.000294606	yes	1.69666	Yes
YER058W	YER058W	YER058W	.	.	V:271767-272091	WT	ksp1-KD	OK	186.27	316.012	0.762586	6.07673	5e-05	0.000294606	yes	1.69653	Yes
YEL058W	YEL058W	YEL058W	.	.	V:43251-44925	WT	ksp1-KD	OK	128.461	217.926	0.762506	3.35785	5e-05	0.000294606	yes	1.69643	Yes
YBR155W	YBR155W	YBR155W	.	.	II:549770-550928	WT	ksp1-KD	OK	41.7956	70.8558	0.761533	10.6044	5e-05	0.000294606	yes	1.69529	Yes
YDR354W	YDR354W	YDR354W	.	.	IV:1184746-1185889	WT	ksp1-KD	OK	88.8456	150.571	0.761074	3.2218	5e-05	0.000294606	yes	1.69475	Yes
YDL171C	YDL171C	YDL171C	.	.	IV:149202-155640	WT	ksp1-KD	OK	200.474	339.499	0.759995	2.36041	5e-05	0.000294606	yes	1.69348	Yes
YDR493W	YDR493W	YDR493W	.	.	IV:1436216-1436588	WT	ksp1-KD	OK	99.7106	168.723	0.75884	2.95566	5e-05	0.000294606	yes	1.69213	Yes
YMR256C	YMR256C	YMR256C	.	.	XIII:778944-779127	WT	ksp1-KD	OK	1080.87	1827.3	0.757515	3.88536	5e-05	0.000294606	yes	1.69058	Yes
YGR067C	YGR067C	YGR067C	.	.	VII:622371-624786	WT	ksp1-KD	OK	5.20113	8.78934	0.75693	3.17261	5e-05	0.000294606	yes	1.68989	Yes
YDR041W	YDR041W	YDR041W	.	.	IV:539802-540414	WT	ksp1-KD	OK	203.916	344.394	0.756086	3.68622	5e-05	0.000294606	yes	1.6889	Yes
YFL041W-A	YFL041W-A	YFL041W-A	.	.	VI:48733-48925	WT	ksp1-KD	OK	111.076	187.144	0.752603	3.16456	5e-05	0.000294606	yes	1.68483	Yes
YKR097W	YKR097W	YKR097W	.	.	XI:631151-632801	WT	ksp1-KD	OK	53.6848	90.3951	0.751729	4.3653	5e-05	0.000294606	yes	1.68381	Yes
YDR322C-A	YDR322C-A	YDR322C-A	.	.	IV:1112002-1112293	WT	ksp1-KD	OK	1346.27	2265.66	0.750965	6.2237	5e-05	0.000294606	yes	1.68292	Yes
YHR137C-A	YHR137C-A	YHR137C-A	.	.	VIII:375708-377250	WT	ksp1-KD	OK	12.7816	21.507	0.750739	2.18407	0.0015	0.00608141	yes	1.68265	Yes
YJL060W	YJL060W	YJL060W	.	.	X:323385-324720	WT	ksp1-KD	OK	155.045	260.805	0.75028	2.88538	5e-05	0.000294606	yes	1.68212	Yes
YBL005W	YBL005W	YBL005W	.	.	II:217469-220400	WT	ksp1-KD	OK	8.92145	15.0014	0.749743	3.82509	5e-05	0.000294606	yes	1.68149	Yes
YDR379C-A	YDR379C-A	YDR379C-A	.	.	IV:1233277-1233517	WT	ksp1-KD	OK	649.943	1092.49	0.749239	3.48457	5e-05	0.000294606	yes	1.68091	Yes
YKL070W	YKL070W	YKL070W	.	.	XI:306210-306720	WT	ksp1-KD	OK	49.9463	83.8739	0.747844	3.63456	5e-05	0.000294606	yes	1.67928	Yes
YBR105C	YBR105C	YBR105C	.	.	II:450880-451969	WT	ksp1-KD	OK	216.187	362.848	0.747085	3.42446	5e-05	0.000294606	yes	1.6784	Yes
YGL066W	YGL066W	YGL066W	.	.	VII:377608-379582	WT	ksp1-KD	OK	23.7719	39.8599	0.745683	3.53931	5e-05	0.000294606	yes	1.67677	Yes
YFL054C	YFL054C	YFL054C	.	.	VI:20846-22787	WT	ksp1-KD	OK	18.0368	30.2223	0.744669	3.45602	5e-05	0.000294606	yes	1.67559	Yes
YLR290C	YLR290C	YLR290C	.	.	XII:717144-717978	WT	ksp1-KD	OK	84.9951	142.417	0.744668	3.7008	5e-05	0.000294606	yes	1.67559	Yes
YKL107W	YKL107W	YKL107W	.	.	XI:236140-237070	WT	ksp1-KD	OK	29.2229	48.9498	0.744205	3.79183	5e-05	0.000294606	yes	1.67505	Yes
YKL192C	YKL192C	YKL192C	.	.	XI:80159-80537	WT	ksp1-KD	OK	228.67	382.566	0.742445	3.55796	5e-05	0.000294606	yes	1.67301	Yes
YKR068C	YKR068C	YKR068C	.	.	XI:570327-570909	WT	ksp1-KD	OK	150.345	251.41	0.74177	4.26641	5e-05	0.000294606	yes	1.67223	Yes
YMR057C	YMR057C	YMR057C	.	.	XIII:388358-388730	WT	ksp1-KD	OK	3.42271	5.71966	0.740791	1.54894	0.01235	0.035704	yes	1.67109	Yes
YDR223W	YDR223W	YDR223W	.	.	IV:912098-913502	WT	ksp1-KD	OK	14.0515	23.4801	0.74071	3.46496	5e-05	0.000294606	yes	1.671	Yes
YHR180W	YHR180W	YHR180W	.	.	VIII:465177-465669	WT	ksp1-KD	OK	36.0507	60.2045	0.739845	3.16819	5e-05	0.000294606	yes	1.67	Yes
YDR034W-B	YDR034W-B	YDR034W-B	.	.	IV:521313-521469	WT	ksp1-KD	OK	63.6026	106.08	0.737993	5.03259	0.0036	0.0127154	yes	1.66785	Yes
YOL047C	YOL047C	YOL047C	.	.	XV:241613-242747	WT	ksp1-KD	OK	4.66731	7.78258	0.737658	2.49554	5e-05	0.000294606	yes	1.66747	Yes
YBR184W	YBR184W	YBR184W	.	.	II:597362-598934	WT	ksp1-KD	OK	3.4587	5.76008	0.735858	2.76723	0.0001	0.000557854	yes	1.66539	Yes
YMR059W	YMR059W	YMR059W	.	.	XIII:391098-391485	WT	ksp1-KD	OK	59.7941	99.5219	0.735011	3.48905	5e-05	0.000294606	yes	1.66441	Yes
YER103W	YER103W	YER103W	.	.	V:364588-366517	WT	ksp1-KD	OK	38.4338	63.9655	0.734919	4.06834	5e-05	0.000294606	yes	1.6643	Yes
YDR203W	YDR203W	YDR203W	.	.	IV:856897-857999	WT	ksp1-KD	OK	118.908	197.735	0.733719	2.77514	0.0116	0.033852	yes	1.66292	Yes
YLL018C	YLL018C	YLL018C	.	.	XII:109901-111575	WT	ksp1-KD	OK	213.762	355.41	0.733476	2.54714	5e-05	0.000294606	yes	1.66264	Yes
YCL004W	YCL004W	YCL004W	.	.	III:109104-110670	WT	ksp1-KD	OK	9.10317	15.1293	0.732906	4.52669	5e-05	0.000294606	yes	1.66198	Yes
YHR209W	YHR209W	YHR209W	.	.	VIII:519436-520312	WT	ksp1-KD	OK	85.6812	142.264	0.731525	4.43922	5e-05	0.000294606	yes	1.66039	Yes
YER106W	YER106W	YER106W	.	.	V:372325-373234	WT	ksp1-KD	OK	1.56145	2.58914	0.729582	1.80342	0.0114	0.0333732	yes	1.65816	Yes
YDR374W-A	YDR374W-A	YDR374W-A	.	.	IV:1224756-1225026	WT	ksp1-KD	OK	121.89	202.109	0.729549	3.62638	5e-05	0.000294606	yes	1.65812	Yes
YMR101C	YMR101C	YMR101C	.	.	XIII:468444-469476	WT	ksp1-KD	OK	1.63769	2.71546	0.729538	1.66068	0.00575	0.0188924	yes	1.65811	Yes
YMR019W	YMR019W	YMR019W	.	.	XIII:312155-315005	WT	ksp1-KD	OK	17.2868	28.6631	0.729523	4.76399	5e-05	0.000294606	yes	1.65809	Yes
YDL104C	YDL104C	YDL104C	.	.	IV:273652-274876	WT	ksp1-KD	OK	24.4862	40.5908	0.729182	3.40787	5e-05	0.000294606	yes	1.6577	Yes
YCR053W	YCR053W	YCR053W	.	.	III:216696-218241	WT	ksp1-KD	OK	286.891	475.33	0.728427	2.50766	5e-05	0.000294606	yes	1.65683	Yes
YDR312W	YDR312W	YDR312W	.	.	IV:1087580-1088942	WT	ksp1-KD	OK	27.2287	45.1017	0.728055	6.1714	5e-05	0.000294606	yes	1.6564	Yes
YGR105W	YGR105W	YGR105W	.	.	VII:698598-698832	WT	ksp1-KD	OK	169.765	281.163	0.727869	3.43056	5e-05	0.000294606	yes	1.65619	Yes
YKR091W	YKR091W	YKR091W	.	.	XI:611524-612265	WT	ksp1-KD	OK	21.2353	35.1679	0.727796	7.79998	5e-05	0.000294606	yes	1.65611	Yes
YPR185W	YPR185W	YPR185W	.	.	XVI:907217-909434	WT	ksp1-KD	OK	19.3703	32.0687	0.727318	3.67407	5e-05	0.000294606	yes	1.65556	Yes
YBR018C	YBR018C	YBR018C	.	.	II:274426-275527	WT	ksp1-KD	OK	1.32446	2.19248	0.72716	1.69901	0.0044	0.0151219	yes	1.65538	Yes
YCR083W	YCR083W	YCR083W	.	.	III:259577-259961	WT	ksp1-KD	OK	1184.48	1960.38	0.726883	4.6235	5e-05	0.000294606	yes	1.65506	Yes
YPL274W	YPL274W	YPL274W	.	.	XVI:22937-24701	WT	ksp1-KD	OK	49.759	82.3404	0.726642	3.21731	5e-05	0.000294606	yes	1.65478	Yes
YHR214W	YHR214W	YHR214W	.	.	VIII:541650-542262	WT	ksp1-KD	OK	0.874463	1.44588	0.725481	1.53095	0.0094	0.0282174	yes	1.65345	Yes
YOR065W	YOR065W	YOR065W	.	.	XV:447438-448368	WT	ksp1-KD	OK	356.992	589.93	0.724652	2.94126	5e-05	0.000294606	yes	1.6525	Yes
YMR063W	YMR063W	YMR063W	.	.	XIII:397076-397796	WT	ksp1-KD	OK	22.4765	37.1328	0.724278	3.57741	5e-05	0.000294606	yes	1.65207	Yes
YIL079C	YIL079C	YIL079C	.	.	IX:210922-212005	WT	ksp1-KD	OK	46.2231	76.3548	0.724105	3.36112	5e-05	0.000294606	yes	1.65188	Yes
YKL217W	YKL217W	YKL217W	.	.	XI:22233-24084	WT	ksp1-KD	OK	9.0862	15.0071	0.723892	2.97937	5e-05	0.000294606	yes	1.65163	Yes
YGL219C	YGL219C	YGL219C	.	.	VII:82877-84300	WT	ksp1-KD	OK	41.18	68.0099	0.723801	2.82051	5e-05	0.000294606	yes	1.65153	Yes
YCR001W	YCR001W	YCR001W	.	.	III:115684-115999	WT	ksp1-KD	OK	36.7236	60.6383	0.723521	2.3464	0.0001	0.000557854	yes	1.65121	Yes
YDR123C	YDR123C	YDR123C	.	.	IV:698553-699468	WT	ksp1-KD	OK	20.8663	34.4032	0.721369	3.37379	5e-05	0.000294606	yes	1.64875	Yes
YJL024C	YJL024C	YJL024C	.	.	X:395930-396592	WT	ksp1-KD	OK	67.8763	111.888	0.72107	4.13894	5e-05	0.000294606	yes	1.6484	Yes
YEL005C	YEL005C	YEL005C	.	.	V:145906-146755	WT	ksp1-KD	OK	30.7031	50.6081	0.720986	3.8001	5e-05	0.000294606	yes	1.64831	Yes
YER044C-A	YER044C-A	YER044C-A	.	.	V:238459-239774	WT	ksp1-KD	OK	2.37674	3.91416	0.719718	2.12122	0.0004	0.00194581	yes	1.64686	Yes
YER139C	YER139C	YER139C	.	.	V:450562-451243	WT	ksp1-KD	OK	50.652	83.3865	0.719194	3.62477	5e-05	0.000294606	yes	1.64626	Yes
YMR287C	YMR287C	YMR287C	.	.	XIII:842435-845345	WT	ksp1-KD	OK	9.08321	14.937	0.717614	3.52892	5e-05	0.000294606	yes	1.64446	Yes
YGR230W	YGR230W	YGR230W	.	.	VII:951893-952307	WT	ksp1-KD	OK	66.2903	108.951	0.716812	3.65333	5e-05	0.000294606	yes	1.64355	Yes
YBR185C	YBR185C	YBR185C	.	.	II:599122-599959	WT	ksp1-KD	OK	18.185	29.8602	0.715477	2.99766	5e-05	0.000294606	yes	1.64203	Yes
YIL009C-A	YIL009C-A	YIL009C-A	.	.	IX:335665-336212	WT	ksp1-KD	OK	54.2418	89.0402	0.715051	3.47603	5e-05	0.000294606	yes	1.64154	Yes
YBL033C	YBL033C	YBL033C	.	.	II:158655-159693	WT	ksp1-KD	OK	300.446	491.981	0.711495	3.45056	5e-05	0.000294606	yes	1.6375	Yes
YLL035W	YLL035W	YLL035W	.	.	XII:68579-70478	WT	ksp1-KD	OK	13.9582	22.8438	0.710697	3.31983	5e-05	0.000294606	yes	1.63659	Yes
YJR062C	YJR062C	YJR062C	.	.	X:553475-554849	WT	ksp1-KD	OK	35.4308	57.9763	0.710459	3.66619	5e-05	0.000294606	yes	1.63632	Yes
YBL043W	YBL043W	YBL043W	.	.	II:136687-137461	WT	ksp1-KD	OK	53.242	87.0474	0.709236	4.91332	5e-05	0.000294606	yes	1.63494	Yes
YBL049W	YBL049W	YBL049W	.	.	II:126827-127244	WT	ksp1-KD	OK	669.785	1094.61	0.708644	2.89841	5e-05	0.000294606	yes	1.63427	Yes
YMR158W	YMR158W	YMR158W	.	.	XIII:572247-572715	WT	ksp1-KD	OK	69.1827	112.939	0.707062	4.05607	5e-05	0.000294606	yes	1.63248	Yes
YIL093C	YIL093C	YIL093C	.	.	IX:187989-188784	WT	ksp1-KD	OK	34.2198	55.8596	0.706974	3.64026	5e-05	0.000294606	yes	1.63238	Yes
YMR245W	YMR245W	YMR245W	.	.	XIII:758516-759183	WT	ksp1-KD	OK	17.0649	27.848	0.706546	2.6581	5e-05	0.000294606	yes	1.63189	Yes
YOR196C	YOR196C	YOR196C	.	.	XV:715592-716837	WT	ksp1-KD	OK	112.307	183.144	0.705536	4.16654	5e-05	0.000294606	yes	1.63075	Yes
YNL035C	YNL035C	YNL035C	.	.	XIV:568521-569691	WT	ksp1-KD	OK	23.8624	38.9078	0.705321	4.52584	5e-05	0.000294606	yes	1.63051	Yes
YCR106W	YCR106W	YCR106W	.	.	III:310957-313456	WT	ksp1-KD	OK	7.30893	11.9157	0.705134	3.49187	5e-05	0.000294606	yes	1.6303	Yes
YNL259C	YNL259C	YNL259C	.	.	XIV:157643-157865	WT	ksp1-KD	OK	343.811	559.984	0.703768	3.94674	5e-05	0.000294606	yes	1.62875	Yes
YJL130C	YJL130C	YJL130C	.	.	X:165722-172367	WT	ksp1-KD	OK	66.7054	108.63	0.703549	2.36789	0.0002	0.00103818	yes	1.62851	Yes
YGR194C	YGR194C	YGR194C	.	.	VII:886072-887875	WT	ksp1-KD	OK	19.3565	31.5054	0.702781	3.3209	5e-05	0.000294606	yes	1.62764	Yes
YNL160W	YNL160W	YNL160W	.	.	XIV:336544-337609	WT	ksp1-KD	OK	436.412	709.504	0.701121	2.67519	0.00015	0.000804996	yes	1.62577	Yes
YKR071C	YKR071C	YKR071C	.	.	XI:574933-575980	WT	ksp1-KD	OK	160.213	260.411	0.700804	3.08803	5e-05	0.000294606	yes	1.62541	Yes
YGR017W	YGR017W	YGR017W	.	.	VII:523786-524694	WT	ksp1-KD	OK	125.153	203.423	0.700792	2.99619	5e-05	0.000294606	yes	1.6254	Yes
YGL218W	YGL218W	YGL218W	.	.	VII:82877-84300	WT	ksp1-KD	OK	82.8623	134.55	0.699355	1.74811	0.0027	0.00994181	yes	1.62378	Yes
YJL131C	YJL131C	YJL131C	.	.	X:164277-165348	WT	ksp1-KD	OK	45.9535	74.3559	0.694272	4.82633	5e-05	0.000294606	yes	1.61807	Yes
YJR156C	YJR156C	YJR156C	.	.	X:728573-729596	WT	ksp1-KD	OK	4.40943	7.13366	0.694052	2.09043	0.00065	0.00297909	yes	1.61782	Yes
YER186C	YER186C	YER186C	.	.	V:561704-562625	WT	ksp1-KD	OK	73.6053	119.066	0.693883	4.12404	5e-05	0.000294606	yes	1.61763	Yes
YBL019W	YBL019W	YBL019W	.	.	II:184352-185915	WT	ksp1-KD	OK	16.8457	27.2323	0.692942	4.03534	5e-05	0.000294606	yes	1.61658	Yes
YMR300C	YMR300C	YMR300C	.	.	XIII:865558-867091	WT	ksp1-KD	OK	87.3377	141.162	0.692677	2.82385	5e-05	0.000294606	yes	1.61628	Yes
YNL119W	YNL119W	YNL119W	.	.	XIV:401032-402521	WT	ksp1-KD	OK	57.6638	93.1422	0.69177	3.69303	5e-05	0.000294606	yes	1.61526	Yes
YOL083W	YOL083W	YOL083W	.	.	XV:165713-166952	WT	ksp1-KD	OK	39.0432	63.052	0.69147	3.35061	5e-05	0.000294606	yes	1.61493	Yes
YMR191W	YMR191W	YMR191W	.	.	XIII:645655-646777	WT	ksp1-KD	OK	127.675	206.105	0.6909	2.90161	5e-05	0.000294606	yes	1.61429	Yes
YGL128C	YGL128C	YGL128C	.	.	VII:269292-270144	WT	ksp1-KD	OK	30.9323	49.931	0.690819	3.25142	5e-05	0.000294606	yes	1.6142	Yes
YDL180W	YDL180W	YDL180W	.	.	IV:135895-137539	WT	ksp1-KD	OK	31.1436	50.2569	0.690387	3.38838	5e-05	0.000294606	yes	1.61372	Yes
YMR105C	YMR105C	YMR105C	.	.	XIII:475896-477606	WT	ksp1-KD	OK	45.4582	73.3378	0.690016	3.03715	5e-05	0.000294606	yes	1.6133	Yes
YBR194W	YBR194W	YBR194W	.	.	II:610037-610409	WT	ksp1-KD	OK	59.8135	96.472	0.689639	2.3931	5e-05	0.000294606	yes	1.61288	Yes
YJR074W	YJR074W	YJR074W	.	.	X:573094-573751	WT	ksp1-KD	OK	85.9617	138.615	0.689316	3.32251	5e-05	0.000294606	yes	1.61252	Yes
YMR009W	YMR009W	YMR009W	.	.	XIII:284101-284641	WT	ksp1-KD	OK	670.785	1080.73	0.688078	3.2521	5e-05	0.000294606	yes	1.61114	Yes
YKR062W	YKR062W	YKR062W	.	.	XI:559665-560652	WT	ksp1-KD	OK	62.889	101.306	0.687847	4.83794	5e-05	0.000294606	yes	1.61088	Yes
YDR253C	YDR253C	YDR253C	.	.	IV:963989-964565	WT	ksp1-KD	OK	123.668	198.905	0.685614	3.68925	5e-05	0.000294606	yes	1.60839	Yes
YOL155C	YOL155C	YOL155C	.	.	XV:28702-31606	WT	ksp1-KD	OK	470.844	757.289	0.685595	3.54719	0.00025	0.00126538	yes	1.60837	Yes
YKL222C	YKL222C	YKL222C	.	.	XI:3502-5620	WT	ksp1-KD	OK	17.8135	28.65	0.685562	3.25356	5e-05	0.000294606	yes	1.60833	Yes
YBL071W-A	YBL071W-A	YBL071W-A	.	.	II:89977-90531	WT	ksp1-KD	OK	264.047	424.597	0.685301	2.33775	0.0003	0.00149174	yes	1.60804	Yes
YOR328W	YOR328W	YOR328W	.	.	XV:931802-936497	WT	ksp1-KD	OK	8.68017	13.9552	0.685005	3.32436	5e-05	0.000294606	yes	1.60771	Yes
YGR215W	YGR215W	YGR215W	.	.	VII:922174-922507	WT	ksp1-KD	OK	165.518	265.997	0.684422	3.71996	5e-05	0.000294606	yes	1.60706	Yes
YBR188C	YBR188C	YBR188C	.	.	II:603684-604107	WT	ksp1-KD	OK	67.6475	108.712	0.684401	3.1231	5e-05	0.000294606	yes	1.60703	Yes
YOR245C	YOR245C	YOR245C	.	.	XV:794075-795332	WT	ksp1-KD	OK	41.3435	66.4315	0.684208	4.75685	5e-05	0.000294606	yes	1.60682	Yes
YKR099W	YKR099W	YKR099W	.	.	XI:635850-638286	WT	ksp1-KD	OK	39.6739	63.7339	0.683873	3.06793	5e-05	0.000294606	yes	1.60645	Yes
YPR098C	YPR098C	YPR098C	.	.	XVI:728946-729528	WT	ksp1-KD	OK	162.529	261.033	0.683541	3.36055	5e-05	0.000294606	yes	1.60608	Yes
YOL020W	YOL020W	YOL020W	.	.	XV:286171-287950	WT	ksp1-KD	OK	6.20181	9.95599	0.682875	2.6359	5e-05	0.000294606	yes	1.60534	Yes
YIL024C	YIL024C	YIL024C	.	.	IX:308601-309171	WT	ksp1-KD	OK	65.5508	104.928	0.678708	3.38071	5e-05	0.000294606	yes	1.60071	Yes
YLR173W	YLR173W	YLR173W	.	.	XII:502420-504247	WT	ksp1-KD	OK	30.279	48.4672	0.678692	3.96088	5e-05	0.000294606	yes	1.60069	Yes
YGR292W	YGR292W	YGR292W	.	.	VII:1076598-1078353	WT	ksp1-KD	OK	1.09922	1.75798	0.677438	1.68343	0.0047	0.0159589	yes	1.5993	Yes
snR51	snR51	snR51	.	.	XVI:718699-718806	WT	ksp1-KD	OK	331.696	529.975	0.676064	1.53249	0.0111	0.032642	yes	1.59777	Yes
YDL087C	YDL087C	YDL087C	.	.	IV:300213-300999	WT	ksp1-KD	OK	16.88	26.97	0.676037	2.74038	5e-05	0.000294606	yes	1.59774	Yes
YGL162W	YGL162W	YGL162W	.	.	VII:198137-199037	WT	ksp1-KD	OK	9.24941	14.7694	0.675179	6.05888	5e-05	0.000294606	yes	1.59679	Yes
YEL029C	YEL029C	YEL029C	.	.	V:96857-97796	WT	ksp1-KD	OK	110.397	176.114	0.673808	3.27687	5e-05	0.000294606	yes	1.59528	Yes
YNR034W	YNR034W	YNR034W	.	.	XIV:690320-691286	WT	ksp1-KD	OK	37.2723	59.4531	0.673646	3.32278	5e-05	0.000294606	yes	1.5951	Yes
YGL220W	YGL220W	YGL220W	.	.	VII:82373-82736	WT	ksp1-KD	OK	194.704	310.313	0.672441	3.35483	5e-05	0.000294606	yes	1.59377	Yes
YOR193W	YOR193W	YOR193W	.	.	XV:710445-711576	WT	ksp1-KD	OK	31.8217	50.7009	0.671999	3.29779	5e-05	0.000294606	yes	1.59328	Yes
YNL032W	YNL032W	YNL032W	.	.	XIV:574505-575351	WT	ksp1-KD	OK	114.838	182.876	0.671259	4.15463	5e-05	0.000294606	yes	1.59246	Yes
YMR052W	YMR052W	YMR052W	.	.	XIII:379585-382898	WT	ksp1-KD	OK	30.7299	48.9353	0.67123	1.73605	0.0045	0.0153843	yes	1.59243	Yes
YHR199C	YHR199C	YHR199C	.	.	VIII:497489-498422	WT	ksp1-KD	OK	113.437	180.61	0.670985	3.42256	5e-05	0.000294606	yes	1.59216	Yes
YMR321C	YMR321C	YMR321C	.	.	XIII:917578-917896	WT	ksp1-KD	OK	8.8655	14.1145	0.670908	1.66179	0.0072	0.0228816	yes	1.59207	Yes
YDL118W	YDL118W	YDL118W	.	.	IV:246688-247682	WT	ksp1-KD	OK	16.2176	25.8051	0.670096	1.44591	0.0125	0.0360735	yes	1.59118	Yes
YOL165C	YOL165C	YOL165C	.	.	XV:1646-2078	WT	ksp1-KD	OK	6.8208	10.8518	0.669924	1.89598	0.0094	0.0282174	yes	1.59099	Yes
YHR016C	YHR016C	YHR016C	.	.	VIII:136880-138455	WT	ksp1-KD	OK	32.8207	52.0785	0.666082	3.21451	5e-05	0.000294606	yes	1.58676	Yes
YDR329C	YDR329C	YDR329C	.	.	IV:1126269-1127595	WT	ksp1-KD	OK	56.3077	89.2859	0.665101	3.06206	5e-05	0.000294606	yes	1.58568	Yes
YIL066C	YIL066C	YIL066C	.	.	IX:238098-240708	WT	ksp1-KD	OK	14.178	22.4736	0.664583	3.32259	5e-05	0.000294606	yes	1.58511	Yes
YMR137C	YMR137C	YMR137C	.	.	XIII:542977-544963	WT	ksp1-KD	OK	15.9947	25.3461	0.664166	3.52978	5e-05	0.000294606	yes	1.58465	Yes
YDR214W	YDR214W	YDR214W	.	.	IV:892874-893927	WT	ksp1-KD	OK	97.9829	155.224	0.663746	3.67282	5e-05	0.000294606	yes	1.58419	Yes
YOR378W	YOR378W	YOR378W	.	.	XV:1049510-1051064	WT	ksp1-KD	OK	7.65449	12.1232	0.663397	2.91958	5e-05	0.000294606	yes	1.58381	Yes
YNL229C	YNL229C	YNL229C	.	.	XIV:219136-220201	WT	ksp1-KD	OK	104.649	165.693	0.662951	3.11316	5e-05	0.000294606	yes	1.58332	Yes
YCL001W-A	YCL001W-A	YCL001W-A	.	.	III:113079-113541	WT	ksp1-KD	OK	14.1617	22.4179	0.662655	2.34955	0.00065	0.00297909	yes	1.58299	Yes
YHL009C	YHL009C	YHL009C	.	.	VIII:84067-85060	WT	ksp1-KD	OK	25.1671	39.8235	0.662083	2.92262	5e-05	0.000294606	yes	1.58237	Yes
YCR007C	YCR007C	YCR007C	.	.	III:126010-126730	WT	ksp1-KD	OK	70.3794	111.336	0.6617	3.73958	5e-05	0.000294606	yes	1.58195	Yes
YGL215W	YGL215W	YGL215W	.	.	VII:87980-89339	WT	ksp1-KD	OK	152.086	240.573	0.661585	3.22637	5e-05	0.000294606	yes	1.58182	Yes
YLR361C-A	YLR361C-A	YLR361C-A	.	.	XII:849382-849679	WT	ksp1-KD	OK	551.385	871.898	0.6611	4.70684	5e-05	0.000294606	yes	1.58129	Yes
YGL114W	YGL114W	YGL114W	.	.	VII:293459-295637	WT	ksp1-KD	OK	51.8435	81.9356	0.660327	2.8105	5e-05	0.000294606	yes	1.58044	Yes
YPL205C	YPL205C	YPL205C	.	.	XVI:163921-164266	WT	ksp1-KD	OK	4.71663	7.45356	0.660174	1.95107	0.0064	0.0207243	yes	1.58027	Yes
YER084W	YER084W	YER084W	.	.	V:327064-327451	WT	ksp1-KD	OK	4.09223	6.4651	0.659783	10.649	0.00355	0.012573	yes	1.57984	Yes
YAL044C	YAL044C	YAL044C	.	.	I:57949-58462	WT	ksp1-KD	OK	504.991	797.335	0.658928	2.88397	5e-05	0.000294606	yes	1.57891	Yes
YHR195W	YHR195W	YHR195W	.	.	VIII:490746-491712	WT	ksp1-KD	OK	96.8039	152.761	0.658144	3.4837	5e-05	0.000294606	yes	1.57805	Yes
YNL331C	YNL331C	YNL331C	.	.	XIV:16117-17248	WT	ksp1-KD	OK	31.1234	49.0835	0.657239	3.2666	5e-05	0.000294606	yes	1.57706	Yes
YPR010C-A	YPR010C-A	YPR010C-A	.	.	XVI:582372-582734	WT	ksp1-KD	OK	2313.39	3647.33	0.656829	3.44878	5e-05	0.000294606	yes	1.57661	Yes
YGR149W	YGR149W	YGR149W	.	.	VII:789030-790329	WT	ksp1-KD	OK	40.3337	63.59	0.656815	3.5116	5e-05	0.000294606	yes	1.5766	Yes
YIL161W	YIL161W	YIL161W	.	.	IX:39432-40140	WT	ksp1-KD	OK	85.4707	134.694	0.656181	3.59807	5e-05	0.000294606	yes	1.57591	Yes
YER101C	YER101C	YER101C	.	.	V:360501-361794	WT	ksp1-KD	OK	30.7434	48.4379	0.655857	3.20584	5e-05	0.000294606	yes	1.57555	Yes
YLR201C	YLR201C	YLR201C	.	.	XII:549510-550636	WT	ksp1-KD	OK	56.0458	88.2952	0.65573	4.63118	5e-05	0.000294606	yes	1.57541	Yes
YJL003W	YJL003W	YJL003W	.	.	X:432643-433000	WT	ksp1-KD	OK	62.4914	98.3998	0.654998	2.99331	5e-05	0.000294606	yes	1.57461	Yes
YBR012C	YBR012C	YBR012C	.	.	II:259146-259566	WT	ksp1-KD	OK	101.895	160.382	0.654437	3.11181	5e-05	0.000294606	yes	1.574	Yes
YDL090C	YDL090C	YDL090C	.	.	IV:295033-296329	WT	ksp1-KD	OK	27.5954	43.4297	0.654252	3.98385	5e-05	0.000294606	yes	1.5738	Yes
YML043C	YML043C	YML043C	.	.	XIII:190243-191767	WT	ksp1-KD	OK	21.607	33.9651	0.652558	3.43435	5e-05	0.000294606	yes	1.57195	Yes
YDR077W	YDR077W	YDR077W	.	.	IV:600792-601809	WT	ksp1-KD	OK	2413.29	3789.45	0.650986	4.2933	0.00075	0.00336852	yes	1.57024	Yes
YHR214W-A	YHR214W-A	YHR214W-A	.	.	VIII:543007-543493	WT	ksp1-KD	OK	2.14514	3.36714	0.650449	4.20487	0.0139	0.0394826	yes	1.56966	Yes
YEL052W	YEL052W	YEL052W	.	.	V:56570-58100	WT	ksp1-KD	OK	33.8616	53.1246	0.649731	3.29719	5e-05	0.000294606	yes	1.56888	Yes
YKL110C	YKL110C	YKL110C	.	.	XI:228938-229880	WT	ksp1-KD	OK	53.002	83.148	0.649635	3.11614	5e-05	0.000294606	yes	1.56877	Yes
YOR011W	YOR011W	YOR011W	.	.	XV:349678-353863	WT	ksp1-KD	OK	5.04254	7.90999	0.649525	2.94814	5e-05	0.000294606	yes	1.56865	Yes
YLR294C	YLR294C	YLR294C	.	.	XII:721700-722373	WT	ksp1-KD	OK	402.732	631.135	0.64813	1.87999	0.00175	0.00690543	yes	1.56714	Yes
YNR066C	YNR066C	YNR066C	.	.	XIV:753724-755035	WT	ksp1-KD	OK	7.93982	12.4418	0.648015	2.40913	5e-05	0.000294606	yes	1.56701	Yes
YOL159C-A	YOL159C-A	YOL159C-A	.	.	XV:15232-15505	WT	ksp1-KD	OK	52.7697	82.6856	0.647926	2.47391	0.00285	0.0104116	yes	1.56691	Yes
YPR064W	YPR064W	YPR064W	.	.	XVI:678950-679370	WT	ksp1-KD	OK	10.369	16.2426	0.647499	2.44112	0.0006	0.0027833	yes	1.56645	Yes
YJR078W	YJR078W	YJR078W	.	.	X:578859-581616	WT	ksp1-KD	OK	31.8319	49.821	0.646281	1.68046	0.01665	0.0457928	yes	1.56513	Yes
YLL059C	YLL059C	YLL059C	.	.	XII:22473-22980	WT	ksp1-KD	OK	3.13253	4.90226	0.646121	1.66171	0.00835	0.0257066	yes	1.56495	Yes
YDR059C	YDR059C	YDR059C	.	.	IV:569233-569770	WT	ksp1-KD	OK	381.569	596.976	0.645729	2.8079	5e-05	0.000294606	yes	1.56453	Yes
YLR109W	YLR109W	YLR109W	.	.	XII:368780-369311	WT	ksp1-KD	OK	1427.94	2233.39	0.645301	2.65951	0.0006	0.0027833	yes	1.56407	Yes
YDL068W	YDL068W	YDL068W	.	.	IV:333120-333829	WT	ksp1-KD	OK	28.3559	44.3281	0.644574	1.87375	0.003	0.010874	yes	1.56328	Yes
YDR511W	YDR511W	YDR511W	.	.	IV:1470016-1470418	WT	ksp1-KD	OK	47.7648	74.5948	0.643127	3.5996	5e-05	0.000294606	yes	1.56171	Yes
YLR318W	YLR318W	YLR318W	.	.	XII:766541-769196	WT	ksp1-KD	OK	6.28243	9.80681	0.642461	3.40308	5e-05	0.000294606	yes	1.56099	Yes
YDR079W	YDR079W	YDR079W	.	.	IV:603063-603399	WT	ksp1-KD	OK	175.605	274.059	0.642151	3.09528	5e-05	0.000294606	yes	1.56065	Yes
YHR037W	YHR037W	YHR037W	.	.	VIII:181976-183704	WT	ksp1-KD	OK	243.678	380.221	0.641864	2.52197	0.00015	0.000804996	yes	1.56034	Yes
YLL039C	YLL039C	YLL039C	.	.	XII:64061-65207	WT	ksp1-KD	OK	1177.46	1836.41	0.641214	1.96403	0.001	0.00430113	yes	1.55964	Yes
YAL048C	YAL048C	YAL048C	.	.	I:52800-54913	WT	ksp1-KD	OK	19.46	30.3425	0.640829	3.30473	5e-05	0.000294606	yes	1.55922	Yes
YOL077W-A	YOL077W-A	YOL077W-A	.	.	XV:185437-185644	WT	ksp1-KD	OK	315.998	492.344	0.639752	2.90877	5e-05	0.000294606	yes	1.55806	Yes
YER127W	YER127W	YER127W	.	.	V:414480-415554	WT	ksp1-KD	OK	51.0196	79.4651	0.639268	3.05	5e-05	0.000294606	yes	1.55754	Yes
YGR280C	YGR280C	YGR280C	.	.	VII:1050909-1051725	WT	ksp1-KD	OK	202.756	315.758	0.639075	4.67676	5e-05	0.000294606	yes	1.55733	Yes
YIR014W	YIR014W	YIR014W	.	.	IX:381085-381814	WT	ksp1-KD	OK	14.6669	22.841	0.639066	2.20457	0.0002	0.00103818	yes	1.55732	Yes
YCR020C	YCR020C	YCR020C	.	.	III:154011-154659	WT	ksp1-KD	OK	60.8478	94.6602	0.637552	2.93503	5e-05	0.000294606	yes	1.55569	Yes
YBR230W-A	YBR230W-A	YBR230W-A	.	.	II:680361-680562	WT	ksp1-KD	OK	573.678	891.621	0.63619	3.15338	0.0002	0.00103818	yes	1.55422	Yes
YBL001C	YBL001C	YBL001C	.	.	II:237152-237467	WT	ksp1-KD	OK	1801.09	2796.85	0.634927	4.75105	5e-05	0.000294606	yes	1.55286	Yes
YMR066W	YMR066W	YMR066W	.	.	XIII:401540-404237	WT	ksp1-KD	OK	12.1445	18.8471	0.634044	3.00464	5e-05	0.000294606	yes	1.55191	Yes
YGR052W	YGR052W	YGR052W	.	.	VII:593595-594705	WT	ksp1-KD	OK	34.1537	52.9448	0.632445	3.14416	5e-05	0.000294606	yes	1.55019	Yes
YOL164W-A	YOL164W-A	YOL164W-A	.	.	XV:4129-4312	WT	ksp1-KD	OK	77.6811	120.409	0.632305	2.88559	0.00325	0.0116373	yes	1.55004	Yes
YLR191W	YLR191W	YLR191W	.	.	XII:537271-538432	WT	ksp1-KD	OK	34.3241	53.1753	0.631534	3.02983	5e-05	0.000294606	yes	1.54921	Yes
YFL018C	YFL018C	YFL018C	.	.	VI:101627-103127	WT	ksp1-KD	OK	261.038	404.328	0.631266	2.38528	0.00015	0.000804996	yes	1.54892	Yes
YDR179C	YDR179C	YDR179C	.	.	IV:818707-819196	WT	ksp1-KD	OK	203.874	315.706	0.630903	4.0476	5e-05	0.000294606	yes	1.54853	Yes
YLR288C	YLR288C	YLR288C	.	.	XII:713479-714904	WT	ksp1-KD	OK	15.4364	23.9031	0.630861	3.3734	5e-05	0.000294606	yes	1.54849	Yes
YKL061W	YKL061W	YKL061W	.	.	XI:325770-326112	WT	ksp1-KD	OK	247.14	382.241	0.629151	5.55007	5e-05	0.000294606	yes	1.54665	Yes
YLL062C	YLL062C	YLL062C	.	.	XII:16638-17613	WT	ksp1-KD	OK	45.9893	71.0478	0.627493	3.13521	5e-05	0.000294606	yes	1.54488	Yes
YNL194C	YNL194C	YNL194C	.	.	XIV:272709-273615	WT	ksp1-KD	OK	6.57284	10.1448	0.62615	3.66602	0.0005	0.00238233	yes	1.54344	Yes
YDR126W	YDR126W	YDR126W	.	.	IV:703233-704244	WT	ksp1-KD	OK	22.831	35.2073	0.624882	2.93005	5e-05	0.000294606	yes	1.54208	Yes
YLR093C	YLR093C	YLR093C	.	.	XII:326512-327415	WT	ksp1-KD	OK	211.034	325.409	0.624779	2.79582	5e-05	0.000294606	yes	1.54197	Yes
YPL027W	YPL027W	YPL027W	.	.	XVI:499664-500402	WT	ksp1-KD	OK	2.98753	4.60502	0.624253	1.57357	0.01485	0.0416531	yes	1.54141	Yes
YKR078W	YKR078W	YKR078W	.	.	XI:584951-586709	WT	ksp1-KD	OK	21.7246	33.4418	0.622322	3.2	5e-05	0.000294606	yes	1.53935	Yes
YKL114C	YKL114C	YKL114C	.	.	XI:223351-224455	WT	ksp1-KD	OK	112.335	172.862	0.62181	3.89994	5e-05	0.000294606	yes	1.5388	Yes
YDR259C	YDR259C	YDR259C	.	.	IV:974630-975782	WT	ksp1-KD	OK	26.18	40.28	0.621602	3.11702	5e-05	0.000294606	yes	1.53858	Yes
YLR343W	YLR343W	YLR343W	.	.	XII:816093-817761	WT	ksp1-KD	OK	9.18564	14.1314	0.621451	2.5178	5e-05	0.000294606	yes	1.53842	Yes
YML123C	YML123C	YML123C	.	.	XIII:24036-25800	WT	ksp1-KD	OK	19.9334	30.6524	0.620814	2.97575	5e-05	0.000294606	yes	1.53774	Yes
YML005W	YML005W	YML005W	.	.	XIII:260220-261609	WT	ksp1-KD	OK	40.7485	62.6486	0.620534	3.61037	5e-05	0.000294606	yes	1.53744	Yes
YIL166C	YIL166C	YIL166C	.	.	IX:30937-32566	WT	ksp1-KD	OK	8.6315	13.2587	0.619255	2.75548	5e-05	0.000294606	yes	1.53608	Yes
YFL046W	YFL046W	YFL046W	.	.	VI:42814-43438	WT	ksp1-KD	OK	88.0963	135.299	0.618995	3.16681	5e-05	0.000294606	yes	1.5358	Yes
YCR023C	YCR023C	YCR023C	.	.	III:158537-160373	WT	ksp1-KD	OK	57.3565	88.0786	0.618834	3.19563	5e-05	0.000294606	yes	1.53563	Yes
YDL123W	YDL123W	YDL123W	.	.	IV:241417-241840	WT	ksp1-KD	OK	78.0795	119.835	0.618034	3.24973	5e-05	0.000294606	yes	1.53478	Yes
YBR269C	YBR269C	YBR269C	.	.	II:742159-742576	WT	ksp1-KD	OK	211.136	323.895	0.617353	3.29021	5e-05	0.000294606	yes	1.53406	Yes
YHR067W	YHR067W	YHR067W	.	.	VIII:230969-231812	WT	ksp1-KD	OK	47.9724	73.588	0.617266	2.99368	5e-05	0.000294606	yes	1.53397	Yes
YGL153W	YGL153W	YGL153W	.	.	VII:216272-217369	WT	ksp1-KD	OK	19.2821	29.5743	0.617083	1.75922	0.00395	0.0137942	yes	1.53377	Yes
YBR037C	YBR037C	YBR037C	.	.	II:310564-311452	WT	ksp1-KD	OK	47.8516	73.3856	0.616932	3.46273	5e-05	0.000294606	yes	1.53361	Yes
YDR531W	YDR531W	YDR531W	.	.	IV:1498231-1499335	WT	ksp1-KD	OK	165.838	254.284	0.616672	2.673	5e-05	0.000294606	yes	1.53333	Yes
YDR414C	YDR414C	YDR414C	.	.	IV:1295597-1296686	WT	ksp1-KD	OK	23.0998	35.4156	0.616502	3.03772	5e-05	0.000294606	yes	1.53315	Yes
YER074W-A	YER074W-A	YER074W-A	.	.	V:307652-308123	WT	ksp1-KD	OK	702.065	1075.28	0.615041	6.6814	5e-05	0.000294606	yes	1.5316	Yes
YML083C	YML083C	YML083C	.	.	XIII:99488-101050	WT	ksp1-KD	OK	1.63233	2.49691	0.61321	2.0304	0.0024	0.00903685	yes	1.52966	Yes
YNL245C	YNL245C	YNL245C	.	.	XIV:185459-186885	WT	ksp1-KD	OK	150.062	229.242	0.611307	1.67499	0.0167	0.0458527	yes	1.52764	Yes
YGR070W	YGR070W	YGR070W	.	.	VII:627805-631273	WT	ksp1-KD	OK	11.3535	17.3347	0.610519	3.04044	5e-05	0.000294606	yes	1.52681	Yes
YLR438W	YLR438W	YLR438W	.	.	XII:1012458-1013775	WT	ksp1-KD	OK	7.27179	11.0997	0.610144	3.979	5e-05	0.000294606	yes	1.52641	Yes
YKL209C	YKL209C	YKL209C	.	.	XI:42422-46295	WT	ksp1-KD	OK	9.03967	13.7945	0.609751	2.87241	5e-05	0.000294606	yes	1.526	Yes
YHL027W	YHL027W	YHL027W	.	.	VIII:51110-52988	WT	ksp1-KD	OK	84.8152	129.329	0.60865	3.92432	5e-05	0.000294606	yes	1.52483	Yes
YER116C	YER116C	YER116C	.	.	V:395347-396172	WT	ksp1-KD	OK	55.6269	84.797	0.60823	2.93618	5e-05	0.000294606	yes	1.52439	Yes
YMR114C	YMR114C	YMR114C	.	.	XIII:496342-497449	WT	ksp1-KD	OK	34.007	51.8025	0.607191	3.82373	5e-05	0.000294606	yes	1.52329	Yes
YIR033W	YIR033W	YIR033W	.	.	IX:416123-419465	WT	ksp1-KD	OK	17.9791	27.3819	0.606906	2.92531	5e-05	0.000294606	yes	1.52299	Yes
YML131W	YML131W	YML131W	.	.	XIII:10197-11295	WT	ksp1-KD	OK	94.4773	143.712	0.605144	2.85406	5e-05	0.000294606	yes	1.52113	Yes
YKL161C	YKL161C	YKL161C	.	.	XI:149385-150687	WT	ksp1-KD	OK	17.2558	26.2435	0.604876	2.55759	5e-05	0.000294606	yes	1.52085	Yes
YPL098C	YPL098C	YPL098C	.	.	XVI:364385-364727	WT	ksp1-KD	OK	136.494	207.417	0.603697	2.8148	5e-05	0.000294606	yes	1.51961	Yes
YNL064C	YNL064C	YNL064C	.	.	XIV:505867-507097	WT	ksp1-KD	OK	593.698	902.027	0.603442	2.16015	0.00025	0.00126538	yes	1.51934	Yes
YHR105W	YHR105W	YHR105W	.	.	VIII:324765-325410	WT	ksp1-KD	OK	23.3166	35.3747	0.601358	2.20631	0.0002	0.00103818	yes	1.51714	Yes
YBL078C	YBL078C	YBL078C	.	.	II:80377-80731	WT	ksp1-KD	OK	1073.67	1627.92	0.60049	6.4822	5e-05	0.000294606	yes	1.51623	Yes
YPL191C	YPL191C	YPL191C	.	.	XVI:183596-184679	WT	ksp1-KD	OK	23.8059	36.0852	0.600087	2.58603	0.0001	0.000557854	yes	1.51581	Yes
snR43	snR43	snR43	.	.	III:107503-107712	WT	ksp1-KD	OK	31.2925	47.4232	0.599774	1.47677	0.01535	0.0428705	yes	1.51548	Yes
YNL093W	YNL093W	YNL093W	.	.	XIV:449867-450530	WT	ksp1-KD	OK	22.6863	34.378	0.599664	2.10038	0.00025	0.00126538	yes	1.51536	Yes
YJL054W	YJL054W	YJL054W	.	.	X:334264-335701	WT	ksp1-KD	OK	60.7961	92.088	0.599035	3.40806	5e-05	0.000294606	yes	1.5147	Yes
YMR148W	YMR148W	YMR148W	.	.	XIII:560365-560812	WT	ksp1-KD	OK	59.575	90.2323	0.598937	3.03154	5e-05	0.000294606	yes	1.5146	Yes
YMR035W	YMR035W	YMR035W	.	.	XIII:341141-341675	WT	ksp1-KD	OK	21.2397	32.1475	0.597944	2.05607	0.00055	0.00257711	yes	1.51356	Yes
YMR106C	YMR106C	YMR106C	.	.	XIII:478300-480190	WT	ksp1-KD	OK	5.9199	8.95667	0.59739	2.82445	5e-05	0.000294606	yes	1.51298	Yes
YGR288W	YGR288W	YGR288W	.	.	VII:1070292-1071714	WT	ksp1-KD	OK	24.1716	36.5394	0.596141	2.79993	5e-05	0.000294606	yes	1.51167	Yes
YFL029C	YFL029C	YFL029C	.	.	VI:78054-79161	WT	ksp1-KD	OK	41.3827	62.5536	0.596066	3.05155	5e-05	0.000294606	yes	1.51159	Yes
YOR040W	YOR040W	YOR040W	.	.	XV:407063-407921	WT	ksp1-KD	OK	66.7424	100.886	0.596051	2.89021	5e-05	0.000294606	yes	1.51157	Yes
YGL158W	YGL158W	YGL158W	.	.	VII:207032-208571	WT	ksp1-KD	OK	1.72041	2.59987	0.595683	1.71906	0.00685	0.0219193	yes	1.51119	Yes
YMR073C	YMR073C	YMR073C	.	.	XIII:412267-412873	WT	ksp1-KD	OK	54.3147	82.0757	0.595612	2.94235	5e-05	0.000294606	yes	1.51111	Yes
YDL139C	YDL139C	YDL139C	.	.	IV:211374-212046	WT	ksp1-KD	OK	42.5524	64.2865	0.595276	2.87738	0.0001	0.000557854	yes	1.51076	Yes
YGR203W	YGR203W	YGR203W	.	.	VII:905236-905683	WT	ksp1-KD	OK	137.79	208.143	0.595103	3.61709	5e-05	0.000294606	yes	1.51058	Yes
YNR022C	YNR022C	YNR022C	.	.	XIV:669773-670193	WT	ksp1-KD	OK	129.007	194.774	0.594357	3.69146	5e-05	0.000294606	yes	1.5098	Yes
YFR046C	YFR046C	YFR046C	.	.	VI:243073-244159	WT	ksp1-KD	OK	50.8912	76.7859	0.593425	3.85084	5e-05	0.000294606	yes	1.50882	Yes
YGL025C	YGL025C	YGL025C	.	.	VII:448763-450123	WT	ksp1-KD	OK	26.7473	40.2943	0.59118	7.74785	5e-05	0.000294606	yes	1.50648	Yes
YNL026W	YNL026W	YNL026W	.	.	XIV:581919-583374	WT	ksp1-KD	OK	26.4395	39.823	0.590907	3.46603	5e-05	0.000294606	yes	1.50619	Yes
YPL239W	YPL239W	YPL239W	.	.	XVI:99483-100086	WT	ksp1-KD	OK	161.589	242.973	0.588466	3.05294	5e-05	0.000294606	yes	1.50365	Yes
YBL093C	YBL093C	YBL093C	.	.	II:44255-44918	WT	ksp1-KD	OK	251.586	378.29	0.588444	2.50788	5e-05	0.000294606	yes	1.50362	Yes
YBR240C	YBR240C	YBR240C	.	.	II:700489-701842	WT	ksp1-KD	OK	6.79302	10.2096	0.587796	2.47851	0.0001	0.000557854	yes	1.50295	Yes
YOR371C	YOR371C	YOR371C	.	.	XV:1031488-1034182	WT	ksp1-KD	OK	14.8826	22.3145	0.584356	2.86403	5e-05	0.000294606	yes	1.49937	No
YJR104C	YJR104C	YJR104C	.	.	X:622549-623014	WT	ksp1-KD	OK	2451.42	3674.29	0.583846	1.91392	0.00235	0.00887945	yes	1.49884	No
YKL078W	YKL078W	YKL078W	.	.	XI:288844-291052	WT	ksp1-KD	OK	20.2464	30.3439	0.583742	3.16858	5e-05	0.000294606	yes	1.49873	No
YLR251W	YLR251W	YLR251W	.	.	XII:641463-642262	WT	ksp1-KD	OK	67.6921	101.433	0.583464	2.32572	0.0002	0.00103818	yes	1.49844	No
YBR026C	YBR026C	YBR026C	.	.	II:292876-294019	WT	ksp1-KD	OK	151.564	227.058	0.583137	2.38042	0.0002	0.00103818	yes	1.4981	No
YCR107W	YCR107W	YCR107W	.	.	III:313889-314981	WT	ksp1-KD	OK	11.1368	16.6664	0.581605	3.43526	5e-05	0.000294606	yes	1.49651	No
YHR034C	YHR034C	YHR034C	.	.	VIII:176964-177999	WT	ksp1-KD	OK	22.8033	34.1246	0.581571	2.58485	5e-05	0.000294606	yes	1.49648	No
YNL070W	YNL070W	YNL070W	.	.	XIV:493365-493548	WT	ksp1-KD	OK	650.129	972.693	0.581258	2.50325	5e-05	0.000294606	yes	1.49615	No
YEL020W-A	YEL020W-A	YEL020W-A	.	.	V:117182-117474	WT	ksp1-KD	OK	499.313	746.779	0.580737	2.81806	5e-05	0.000294606	yes	1.49561	No
YPR184W	YPR184W	YPR184W	.	.	XVI:902043-906654	WT	ksp1-KD	OK	14.7589	22.0481	0.579066	2.59868	5e-05	0.000294606	yes	1.49388	No
YLR273C	YLR273C	YLR273C	.	.	XII:689082-691029	WT	ksp1-KD	OK	9.2137	13.759	0.57852	2.52893	5e-05	0.000294606	yes	1.49332	No
YFL017C	YFL017C	YFL017C	.	.	VI:103982-104462	WT	ksp1-KD	OK	60.2689	89.98	0.578191	3.08116	5e-05	0.000294606	yes	1.49298	No
YMR251W	YMR251W	YMR251W	.	.	XIII:772914-774015	WT	ksp1-KD	OK	9.41407	14.0546	0.578148	2.15788	0.00045	0.00216794	yes	1.49293	No
YGL243W	YGL243W	YGL243W	.	.	VII:43306-44509	WT	ksp1-KD	OK	46.7131	69.7338	0.578032	3.1469	5e-05	0.000294606	yes	1.49281	No
YMR181C	YMR181C	YMR181C	.	.	XIII:623615-624080	WT	ksp1-KD	OK	424.438	633.262	0.57725	2.98478	0.00015	0.000804996	yes	1.492	No
YPR042C	YPR042C	YPR042C	.	.	XVI:650434-653662	WT	ksp1-KD	OK	7.574	11.2971	0.576825	3.49331	5e-05	0.000294606	yes	1.49156	No
YNL268W	YNL268W	YNL268W	.	.	XIV:138549-140385	WT	ksp1-KD	OK	122.439	182.618	0.576768	2.28998	0.0005	0.00238233	yes	1.4915	No
YMR306W	YMR306W	YMR306W	.	.	XIII:881158-886572	WT	ksp1-KD	OK	2.64006	3.93621	0.576236	2.32619	0.00015	0.000804996	yes	1.49095	No
YMR139W	YMR139W	YMR139W	.	.	XIII:546124-547237	WT	ksp1-KD	OK	52.3026	77.9788	0.5762	2.80485	5e-05	0.000294606	yes	1.49092	No
YKL122C	YKL122C	YKL122C	.	.	XI:212494-212998	WT	ksp1-KD	OK	97.2587	144.986	0.576018	4.62662	5e-05	0.000294606	yes	1.49073	No
YDR286C	YDR286C	YDR286C	.	.	IV:1035230-1035575	WT	ksp1-KD	OK	62.493	93.1437	0.575763	2.10953	0.00045	0.00216794	yes	1.49047	No
YOL002C	YOL002C	YOL002C	.	.	XV:323410-324364	WT	ksp1-KD	OK	128.133	190.975	0.57574	2.53765	5e-05	0.000294606	yes	1.49044	No
YJL199C	YJL199C	YJL199C	.	.	X:59855-60182	WT	ksp1-KD	OK	44.8124	66.7895	0.575724	3.50985	0.0006	0.0027833	yes	1.49043	No
YNL006W	YNL006W	YNL006W	.	.	XIV:620066-620978	WT	ksp1-KD	OK	99.7573	148.642	0.575342	3.86299	5e-05	0.000294606	yes	1.49003	No
YDR421W	YDR421W	YDR421W	.	.	IV:1312039-1314892	WT	ksp1-KD	OK	19.8125	29.5056	0.574578	4.03789	5e-05	0.000294606	yes	1.48924	No
YBR255W	YBR255W	YBR255W	.	.	II:724455-726540	WT	ksp1-KD	OK	26.8384	39.9576	0.574171	2.88233	5e-05	0.000294606	yes	1.48882	No
YLR432W	YLR432W	YLR432W	.	.	XII:1002556-1004128	WT	ksp1-KD	OK	192.088	285.641	0.572437	2.22125	0.00085	0.00373758	yes	1.48703	No
YOR161C	YOR161C	YOR161C	.	.	XV:636938-638558	WT	ksp1-KD	OK	21.4082	31.8287	0.572165	2.4861	5e-05	0.000294606	yes	1.48675	No
YGL152C	YGL152C	YGL152C	.	.	VII:216272-217369	WT	ksp1-KD	OK	35.2823	52.4525	0.572069	3.21743	5e-05	0.000294606	yes	1.48665	No
YAL046C	YAL046C	YAL046C	.	.	I:57028-57385	WT	ksp1-KD	OK	181.376	269.601	0.571845	2.59051	5e-05	0.000294606	yes	1.48642	No
YGR112W	YGR112W	YGR112W	.	.	VII:717357-718527	WT	ksp1-KD	OK	20.003	29.7265	0.571538	2.7443	5e-05	0.000294606	yes	1.48611	No
YLR081W	YLR081W	YLR081W	.	.	XII:290211-291936	WT	ksp1-KD	OK	5.55894	8.24063	0.567944	2.04959	0.0004	0.00194581	yes	1.48241	No
YDR007W	YDR007W	YDR007W	.	.	IV:461841-462602	WT	ksp1-KD	OK	119.397	176.98	0.567818	3.84854	0.00135	0.00555998	yes	1.48228	No
YPL107W	YPL107W	YPL107W	.	.	XVI:349118-349865	WT	ksp1-KD	OK	184.971	273.994	0.566849	4.29588	5e-05	0.000294606	yes	1.48128	No
YNL099C	YNL099C	YNL099C	.	.	XIV:438566-439283	WT	ksp1-KD	OK	80.7852	119.635	0.566472	2.871	5e-05	0.000294606	yes	1.4809	No
YBR141C	YBR141C	YBR141C	.	.	II:527024-528038	WT	ksp1-KD	OK	40.4803	59.9183	0.565777	2.68806	5e-05	0.000294606	yes	1.48018	No
YBR069C	YBR069C	YBR069C	.	.	II:376573-378433	WT	ksp1-KD	OK	3.11256	4.60489	0.565064	1.86307	0.0014	0.00574044	yes	1.47945	No
YLR258W	YLR258W	YLR258W	.	.	XII:660715-662833	WT	ksp1-KD	OK	48.5555	71.7953	0.564254	3.05264	5e-05	0.000294606	yes	1.47862	No
YBR258C	YBR258C	YBR258C	.	.	II:729733-730162	WT	ksp1-KD	OK	178.372	263.587	0.563394	4.6013	0.0008	0.00354894	yes	1.47774	No
YEL039C	YEL039C	YEL039C	.	.	V:79635-79977	WT	ksp1-KD	OK	872.816	1288.63	0.562091	4.70894	5e-05	0.000294606	yes	1.47641	No
YFR043C	YFR043C	YFR043C	.	.	VI:239113-239827	WT	ksp1-KD	OK	54.8449	80.8477	0.55985	3.05249	5e-05	0.000294606	yes	1.47412	No
YOR052C	YOR052C	YOR052C	.	.	XV:426771-427224	WT	ksp1-KD	OK	2754.35	4059.23	0.559494	3.27258	0.0007	0.00317245	yes	1.47375	No
YFL042C	YFL042C	YFL042C	.	.	VI:45719-47744	WT	ksp1-KD	OK	37.2499	54.89	0.559305	2.57634	5e-05	0.000294606	yes	1.47356	No
YLR316C	YLR316C	YLR316C	.	.	XII:764807-766358	WT	ksp1-KD	OK	36.0034	53.0453	0.559094	2.21885	0.0018	0.00708123	yes	1.47334	No
YLR304C	YLR304C	YLR304C	.	.	XII:735211-737548	WT	ksp1-KD	OK	339.859	500.699	0.559007	1.90504	0.00315	0.0113355	yes	1.47325	No
YBL076C	YBL076C	YBL076C	.	.	II:80896-84261	WT	ksp1-KD	OK	229.625	338.215	0.558665	1.91735	0.00185	0.0072385	yes	1.47291	No
YKL137W	YKL137W	YKL137W	.	.	XI:185956-186292	WT	ksp1-KD	OK	117.172	172.567	0.55853	2.27435	0.00015	0.000804996	yes	1.47277	No
YJR057W	YJR057W	YJR057W	.	.	X:544061-544712	WT	ksp1-KD	OK	79.4896	116.968	0.557279	3.24361	5e-05	0.000294606	yes	1.47149	No
YDR085C	YDR085C	YDR085C	.	.	IV:614287-616150	WT	ksp1-KD	OK	12.8447	18.8933	0.556701	2.57778	5e-05	0.000294606	yes	1.4709	No
YHR116W	YHR116W	YHR116W	.	.	VIII:341664-342120	WT	ksp1-KD	OK	17.6156	25.8985	0.556011	1.86675	0.00145	0.0059156	yes	1.4702	No
YJL160C	YJL160C	YJL160C	.	.	X:117961-118825	WT	ksp1-KD	OK	2.62749	3.86187	0.555615	1.51844	0.00725	0.0230067	yes	1.4698	No
YBR296C	YBR296C	YBR296C	.	.	II:796797-798522	WT	ksp1-KD	OK	1.15348	1.69478	0.555098	1.44124	0.01355	0.0386234	yes	1.46927	No
YBL059W	YBL059W	YBL059W	.	.	II:110593-111244	WT	ksp1-KD	OK	52.1466	76.6134	0.555023	2.32823	0.00015	0.000804996	yes	1.46919	No
YBR034C	YBR034C	YBR034C	.	.	II:304929-305976	WT	ksp1-KD	OK	189.432	278.257	0.554738	2.5977	5e-05	0.000294606	yes	1.4689	No
YDR066C	YDR066C	YDR066C	.	.	IV:581907-582498	WT	ksp1-KD	OK	82.9702	121.858	0.554532	3.13883	5e-05	0.000294606	yes	1.46869	No
YDL186W	YDL186W	YDL186W	.	.	IV:125508-126449	WT	ksp1-KD	OK	16.7803	24.6318	0.553752	2.22593	0.0001	0.000557854	yes	1.4679	No
YBL101C	YBL101C	YBL101C	.	.	II:24945-28299	WT	ksp1-KD	OK	21.6686	31.8019	0.553507	2.68288	5e-05	0.000294606	yes	1.46765	No
YBR193C	YBR193C	YBR193C	.	.	II:609081-609753	WT	ksp1-KD	OK	41.4684	60.832	0.55282	2.81436	5e-05	0.000294606	yes	1.46695	No
YDR481C	YDR481C	YDR481C	.	.	IV:1418549-1420250	WT	ksp1-KD	OK	231.005	338.839	0.552679	1.94775	0.00085	0.00373758	yes	1.46681	No
YNL305C	YNL305C	YNL305C	.	.	XIV:58897-59791	WT	ksp1-KD	OK	65.5882	96.1875	0.552414	3.47087	5e-05	0.000294606	yes	1.46654	No
YHR020W	YHR020W	YHR020W	.	.	VIII:143995-146062	WT	ksp1-KD	OK	134.123	196.395	0.550204	1.99778	0.00095	0.00409691	yes	1.46429	No
YIL022W	YIL022W	YIL022W	.	.	IX:311164-312460	WT	ksp1-KD	OK	108.534	158.91	0.550062	2.66667	5e-05	0.000294606	yes	1.46415	No
YOR258W	YOR258W	YOR258W	.	.	XV:811670-812324	WT	ksp1-KD	OK	38.6541	56.5625	0.549222	2.64755	0.0002	0.00103818	yes	1.4633	No
YHR078W	YHR078W	YHR078W	.	.	VIII:256359-258018	WT	ksp1-KD	OK	33.6336	49.2121	0.549112	2.81151	5e-05	0.000294606	yes	1.46318	No
YGR281W	YGR281W	YGR281W	.	.	VII:1052823-1057257	WT	ksp1-KD	OK	24.5083	35.8538	0.548853	2.48265	5e-05	0.000294606	yes	1.46292	No
YLR363C	YLR363C	YLR363C	.	.	XII:852494-853151	WT	ksp1-KD	OK	79.2008	115.848	0.548644	4.67616	0.0001	0.000557854	yes	1.46271	No
YBR058C-A	YBR058C-A	YBR058C-A	.	.	II:356323-356566	WT	ksp1-KD	OK	719.097	1050.87	0.54732	2.63574	5e-05	0.000294606	yes	1.46137	No
YGL047W	YGL047W	YGL047W	.	.	VII:411551-412160	WT	ksp1-KD	OK	91.2576	133.33	0.54698	3.09292	5e-05	0.000294606	yes	1.46102	No
YDR538W	YDR538W	YDR538W	.	.	IV:1510855-1511630	WT	ksp1-KD	OK	23.8633	34.8402	0.545959	2.75682	0.0001	0.000557854	yes	1.45999	No
YOR163W	YOR163W	YOR163W	.	.	XV:642740-643307	WT	ksp1-KD	OK	180.357	263.312	0.545921	3.23953	5e-05	0.000294606	yes	1.45995	No
YLR356W	YLR356W	YLR356W	.	.	XII:840320-840914	WT	ksp1-KD	OK	125.096	182.597	0.545625	3.25636	5e-05	0.000294606	yes	1.45965	No
YGL131C	YGL131C	YGL131C	.	.	VII:261579-265859	WT	ksp1-KD	OK	10.6819	15.591	0.545537	2.6059	5e-05	0.000294606	yes	1.45956	No
YMR147W	YMR147W	YMR147W	.	.	XIII:559198-559870	WT	ksp1-KD	OK	20.0841	29.3041	0.54505	4.58391	0.00025	0.00126538	yes	1.45907	No
YPR093C	YPR093C	YPR093C	.	.	XVI:719557-720424	WT	ksp1-KD	OK	51.1129	74.5562	0.544639	3.12	5e-05	0.000294606	yes	1.45866	No
YDR031W	YDR031W	YDR031W	.	.	IV:503497-503863	WT	ksp1-KD	OK	329.702	480.917	0.544626	4.1447	0.0002	0.00103818	yes	1.45864	No
YNL230C	YNL230C	YNL230C	.	.	XIV:217522-218662	WT	ksp1-KD	OK	19.5391	28.4734	0.543251	2.65374	5e-05	0.000294606	yes	1.45725	No
YOR343C	YOR343C	YOR343C	.	.	XV:968147-968474	WT	ksp1-KD	OK	24.5889	35.8296	0.543145	1.73414	0.008	0.0248409	yes	1.45715	No
YHR019C	YHR019C	YHR019C	.	.	VIII:141893-143558	WT	ksp1-KD	OK	313.567	456.531	0.541938	1.81179	0.0026	0.00967778	yes	1.45593	No
YGR212W	YGR212W	YGR212W	.	.	VII:917039-918446	WT	ksp1-KD	OK	20.858	30.3632	0.541725	2.52031	5e-05	0.000294606	yes	1.45571	No
YNR036C	YNR036C	YNR036C	.	.	XIV:694360-694822	WT	ksp1-KD	OK	256.275	373.054	0.541691	3.06701	5e-05	0.000294606	yes	1.45568	No
YDL069C	YDL069C	YDL069C	.	.	IV:333120-333829	WT	ksp1-KD	OK	60.3315	87.79	0.541146	2.20002	0.0008	0.00354894	yes	1.45513	No
YPL119C	YPL119C	YPL119C	.	.	XVI:324410-326264	WT	ksp1-KD	OK	14.909	21.6832	0.540389	2.57748	5e-05	0.000294606	yes	1.45436	No
YCR024C	YCR024C	YCR024C	.	.	III:160743-162222	WT	ksp1-KD	OK	21.2367	30.8853	0.540362	2.74776	5e-05	0.000294606	yes	1.45434	No
YLR011W	YLR011W	YLR011W	.	.	XII:169102-169678	WT	ksp1-KD	OK	72.1044	104.846	0.540106	2.52937	0.0001	0.000557854	yes	1.45408	No
YBR229C	YBR229C	YBR229C	.	.	II:676356-679221	WT	ksp1-KD	OK	14.9258	21.703	0.540089	2.79238	5e-05	0.000294606	yes	1.45406	No
YLR453C	YLR453C	YLR453C	.	.	XII:1041798-1042986	WT	ksp1-KD	OK	13.0227	18.9336	0.539922	2.26614	0.00015	0.000804996	yes	1.45389	No
YBR065C	YBR065C	YBR065C	.	.	II:368583-369678	WT	ksp1-KD	OK	28.2515	41.073	0.539864	2.49406	0.0002	0.00103818	yes	1.45384	No
YLR411W	YLR411W	YLR411W	.	.	XII:947252-947978	WT	ksp1-KD	OK	21.146	30.7396	0.539714	2.27988	0.0001	0.000557854	yes	1.45368	No
YLL016W	YLL016W	YLL016W	.	.	XII:112846-115993	WT	ksp1-KD	OK	8.12168	11.8036	0.53938	2.49741	5e-05	0.000294606	yes	1.45335	No
YOR136W	YOR136W	YOR136W	.	.	XV:580158-581359	WT	ksp1-KD	OK	540.367	785.283	0.539274	1.76281	0.0029	0.0105586	yes	1.45324	No
YOR294W	YOR294W	YOR294W	.	.	XV:868339-868951	WT	ksp1-KD	OK	190.22	276.424	0.539211	2.50293	5e-05	0.000294606	yes	1.45318	No
YLR088W	YLR088W	YLR088W	.	.	XII:316106-317951	WT	ksp1-KD	OK	20.6059	29.9392	0.538978	2.94304	5e-05	0.000294606	yes	1.45294	No
YHR005C	YHR005C	YHR005C	.	.	VIII:113498-114917	WT	ksp1-KD	OK	19.4747	28.2894	0.538657	3.45089	0.00055	0.00257711	yes	1.45262	No
YPL078C	YPL078C	YPL078C	.	.	XVI:408009-408744	WT	ksp1-KD	OK	347.598	504.915	0.53862	2.13616	0.00045	0.00216794	yes	1.45258	No
YGL262W	YGL262W	YGL262W	.	.	VII:5311-5839	WT	ksp1-KD	OK	25.7515	37.4025	0.538476	2.43413	0.0085	0.0261189	yes	1.45244	No
YIL155C	YIL155C	YIL155C	.	.	IX:51758-53708	WT	ksp1-KD	OK	64.849	94.178	0.538305	2.59326	0.00035	0.00171801	yes	1.45227	No
YPR005C	YPR005C	YPR005C	.	.	XVI:565786-566671	WT	ksp1-KD	OK	21.4781	31.1786	0.53769	2.27168	0.0001	0.000557854	yes	1.45165	No
YIL059C	YIL059C	YIL059C	.	.	IX:246391-247198	WT	ksp1-KD	OK	153.712	223.114	0.537556	2.01577	0.0008	0.00354894	yes	1.45151	No
YPL047W	YPL047W	YPL047W	.	.	XVI:465961-466261	WT	ksp1-KD	OK	240.222	348.626	0.53731	2.40095	0.0001	0.000557854	yes	1.45126	No
YKL012W	YKL012W	YKL012W	.	.	XI:418309-420061	WT	ksp1-KD	OK	43.9484	63.7558	0.536747	3.23291	5e-05	0.000294606	yes	1.4507	No
YPR133W-A	YPR133W-A	YPR133W-A	.	.	XVI:797556-797709	WT	ksp1-KD	OK	1024.16	1485.11	0.536134	2.54837	0.0027	0.00994181	yes	1.45008	No
YER071C	YER071C	YER071C	.	.	V:301946-302327	WT	ksp1-KD	OK	84.3744	122.294	0.53548	2.52543	0.0001	0.000557854	yes	1.44942	No
YNL046W	YNL046W	YNL046W	.	.	XIV:542303-542822	WT	ksp1-KD	OK	92.1834	133.479	0.534034	2.48419	5e-05	0.000294606	yes	1.44797	No
YPL046C	YPL046C	YPL046C	.	.	XVI:466643-466943	WT	ksp1-KD	OK	126.356	182.882	0.533422	3.40932	0.00175	0.00690543	yes	1.44736	No
YBR008C	YBR008C	YBR008C	.	.	II:252562-254209	WT	ksp1-KD	OK	47.7529	69.0862	0.532809	2.52036	5e-05	0.000294606	yes	1.44674	No
YGR166W	YGR166W	YGR166W	.	.	VII:830514-832197	WT	ksp1-KD	OK	15.7793	22.8276	0.532742	2.46347	5e-05	0.000294606	yes	1.44668	No
YER121W	YER121W	YER121W	.	.	V:402374-402719	WT	ksp1-KD	OK	64.7365	93.5786	0.531599	1.96436	0.0015	0.00608141	yes	1.44553	No
YPR067W	YPR067W	YPR067W	.	.	XVI:682219-682777	WT	ksp1-KD	OK	31.7944	45.9462	0.531172	2.71394	5e-05	0.000294606	yes	1.4451	No
YKL049C	YKL049C	YKL049C	.	.	XI:346074-346764	WT	ksp1-KD	OK	201.405	290.527	0.52857	4.98664	5e-05	0.000294606	yes	1.4425	No
YOR007C	YOR007C	YOR007C	.	.	XV:338937-339978	WT	ksp1-KD	OK	1042.54	1503.85	0.528555	2.36948	0.00275	0.0100859	yes	1.44248	No
YJR082C	YJR082C	YJR082C	.	.	X:581913-582255	WT	ksp1-KD	OK	337.452	486.721	0.528415	2.5279	5e-05	0.000294606	yes	1.44234	No
YEL062W	YEL062W	YEL062W	.	.	V:34406-36254	WT	ksp1-KD	OK	25.8945	37.3481	0.52839	2.99383	5e-05	0.000294606	yes	1.44232	No
YER137C	YER137C	YER137C	.	.	V:441372-441880	WT	ksp1-KD	OK	51.6677	74.4871	0.527726	1.90045	0.0118	0.0343431	yes	1.44166	No
YFR034C	YFR034C	YFR034C	.	.	VI:225019-225958	WT	ksp1-KD	OK	33.6083	48.4436	0.527489	2.72876	5e-05	0.000294606	yes	1.44142	No
YJL062W-A	YJL062W-A	YJL062W-A	.	.	X:316722-316980	WT	ksp1-KD	OK	142.365	205.179	0.527294	1.95354	0.00095	0.00409691	yes	1.44122	No
YFL034C-A	YFL034C-A	YFL034C-A	.	.	VI:64242-64932	WT	ksp1-KD	OK	554.752	799.392	0.52706	2.26481	0.0001	0.000557854	yes	1.44099	No
YBR153W	YBR153W	YBR153W	.	.	II:547459-548194	WT	ksp1-KD	OK	95.4683	137.543	0.526787	2.94023	5e-05	0.000294606	yes	1.44072	No
YCR028C	YCR028C	YCR028C	.	.	III:170885-172424	WT	ksp1-KD	OK	53.5337	77.107	0.526413	3.02918	5e-05	0.000294606	yes	1.44034	No
YDR068W	YDR068W	YDR068W	.	.	IV:583712-584645	WT	ksp1-KD	OK	287.791	414.335	0.525777	5.20994	5e-05	0.000294606	yes	1.43971	No
YLR298C	YLR298C	YLR298C	.	.	XII:724720-725416	WT	ksp1-KD	OK	95.4507	137.383	0.52538	2.83695	5e-05	0.000294606	yes	1.43931	No
YOL049W	YOL049W	YOL049W	.	.	XV:238618-240094	WT	ksp1-KD	OK	85.3328	122.796	0.525097	2.38733	0.00025	0.00126538	yes	1.43903	No
YKL082C	YKL082C	YKL082C	.	.	XI:280920-282329	WT	ksp1-KD	OK	226.385	325.733	0.524913	4.83076	0.0001	0.000557854	yes	1.43885	No
YML098W	YML098W	YML098W	.	.	XIII:77266-77770	WT	ksp1-KD	OK	258.723	372.145	0.524455	2.58685	5e-05	0.000294606	yes	1.43839	No
YGR061C	YGR061C	YGR061C	.	.	VII:611888-615965	WT	ksp1-KD	OK	104.473	150.269	0.524423	1.86526	0.00225	0.00854632	yes	1.43836	No
YDR231C	YDR231C	YDR231C	.	.	IV:926222-926910	WT	ksp1-KD	OK	59.1145	84.9804	0.523618	2.45537	0.0002	0.00103818	yes	1.43756	No
YAL008W	YAL008W	YAL008W	.	.	I:136913-137510	WT	ksp1-KD	OK	127.41	183.086	0.52304	3.49642	5e-05	0.000294606	yes	1.43698	No
YDL181W	YDL181W	YDL181W	.	.	IV:135178-135436	WT	ksp1-KD	OK	634.36	911.486	0.522918	3.14417	5e-05	0.000294606	yes	1.43686	No
YLR245C	YLR245C	YLR245C	.	.	XII:626501-626930	WT	ksp1-KD	OK	63.5665	91.3235	0.522721	2.37222	0.00035	0.00171801	yes	1.43666	No
YLR147C	YLR147C	YLR147C	.	.	XII:434157-434463	WT	ksp1-KD	OK	256.935	368.866	0.521697	3.41919	5e-05	0.000294606	yes	1.43564	No
YCL049C	YCL049C	YCL049C	.	.	III:39785-40724	WT	ksp1-KD	OK	31.2109	44.8037	0.521569	2.60197	5e-05	0.000294606	yes	1.43552	No
YOL154W	YOL154W	YOL154W	.	.	XV:34657-35407	WT	ksp1-KD	OK	18.5043	26.5489	0.520788	2.47875	0.00055	0.00257711	yes	1.43474	No
YGL036W	YGL036W	YGL036W	.	.	VII:428600-431330	WT	ksp1-KD	OK	11.6453	16.7076	0.52075	2.56458	5e-05	0.000294606	yes	1.4347	No
YDR080W	YDR080W	YDR080W	.	.	IV:604007-606986	WT	ksp1-KD	OK	31.6761	45.4099	0.519612	2.41203	0.00015	0.000804996	yes	1.43357	No
YOL133W	YOL133W	YOL133W	.	.	XV:70155-70690	WT	ksp1-KD	OK	234.42	335.632	0.517785	2.59395	5e-05	0.000294606	yes	1.43176	No
YJR035W	YJR035W	YJR035W	.	.	X:497354-500612	WT	ksp1-KD	OK	19.7436	28.2645	0.517604	2.81303	5e-05	0.000294606	yes	1.43158	No
YDR349C	YDR349C	YDR349C	.	.	IV:1172385-1174176	WT	ksp1-KD	OK	62.5667	89.5643	0.517529	2.2882	5e-05	0.000294606	yes	1.4315	No
YCR020C-A	YCR020C-A	YCR020C-A	.	.	III:154829-155096	WT	ksp1-KD	OK	679.939	973.07	0.517137	4.63455	5e-05	0.000294606	yes	1.43111	No
YDR371W	YDR371W	YDR371W	.	.	IV:1219412-1220948	WT	ksp1-KD	OK	26.0487	37.2703	0.516817	2.41809	0.0001	0.000557854	yes	1.4308	No
YDL111C	YDL111C	YDL111C	.	.	IV:263312-264110	WT	ksp1-KD	OK	115.245	164.845	0.5164	2.39569	5e-05	0.000294606	yes	1.43038	No
YDR043C	YDR043C	YDR043C	.	.	IV:542673-543369	WT	ksp1-KD	OK	43.6889	62.4706	0.515911	2.44654	5e-05	0.000294606	yes	1.4299	No
YOR308C	YOR308C	YOR308C	.	.	XV:894623-896387	WT	ksp1-KD	OK	13.4442	19.2207	0.515684	4.19578	5e-05	0.000294606	yes	1.42967	No
YML028W	YML028W	YML028W	.	.	XIII:220137-220728	WT	ksp1-KD	OK	1165.33	1665.55	0.515259	1.83237	0.00495	0.0166857	yes	1.42925	No
YDR363W-A	YDR363W-A	YDR363W-A	.	.	IV:1202127-1202397	WT	ksp1-KD	OK	2072.16	2960.18	0.514549	2.98917	5e-05	0.000294606	yes	1.42855	No
YHR206W	YHR206W	YHR206W	.	.	VIII:512731-514600	WT	ksp1-KD	OK	38.8276	55.451	0.514131	3.38731	0.0001	0.000557854	yes	1.42813	No
YOR319W	YOR319W	YOR319W	.	.	XV:912821-913463	WT	ksp1-KD	OK	152.715	218.075	0.513981	3.14816	5e-05	0.000294606	yes	1.42799	No
YMR286W	YMR286W	YMR286W	.	.	XIII:841941-842202	WT	ksp1-KD	OK	260.628	371.979	0.513226	2.44984	0.0001	0.000557854	yes	1.42724	No
YER047C	YER047C	YER047C	.	.	V:243699-246503	WT	ksp1-KD	OK	17.9524	25.6166	0.512905	2.63105	5e-05	0.000294606	yes	1.42692	No
YOR236W	YOR236W	YOR236W	.	.	XV:780905-781541	WT	ksp1-KD	OK	70.9227	101.176	0.512553	5.40111	0.0001	0.000557854	yes	1.42657	No
YKL206C	YKL206C	YKL206C	.	.	XI:49005-49809	WT	ksp1-KD	OK	86.6544	123.609	0.512433	2.66954	0.0001	0.000557854	yes	1.42645	No
YDR530C	YDR530C	YDR530C	.	.	IV:1496790-1497768	WT	ksp1-KD	OK	32.6165	46.5083	0.511884	2.44879	5e-05	0.000294606	yes	1.42591	No
YLR073C	YLR073C	YLR073C	.	.	XII:281018-281621	WT	ksp1-KD	OK	56.3712	80.3774	0.511832	2.30788	0.0001	0.000557854	yes	1.42586	No
YKR085C	YKR085C	YKR085C	.	.	XI:599093-599681	WT	ksp1-KD	OK	52.0991	74.2025	0.510211	2.73087	0.00015	0.000804996	yes	1.42426	No
YHR194W	YHR194W	YHR194W	.	.	VIII:488652-490396	WT	ksp1-KD	OK	14.6756	20.9007	0.510136	3.38055	5e-05	0.000294606	yes	1.42418	No
YGL229C	YGL229C	YGL229C	.	.	VII:64502-66959	WT	ksp1-KD	OK	4.10781	5.84676	0.509268	1.85419	0.00165	0.00659493	yes	1.42333	No
YOR228C	YOR228C	YOR228C	.	.	XV:766868-767777	WT	ksp1-KD	OK	53.3949	75.9334	0.508031	2.61186	5e-05	0.000294606	yes	1.42211	No
YNL306W	YNL306W	YNL306W	.	.	XIV:58154-58808	WT	ksp1-KD	OK	165.309	235.019	0.507608	3.32147	5e-05	0.000294606	yes	1.42169	No
YNL277W	YNL277W	YNL277W	.	.	XIV:117348-118826	WT	ksp1-KD	OK	60.508	86.0202	0.50755	1.82668	0.00205	0.00790211	yes	1.42163	No
YKL063C	YKL063C	YKL063C	.	.	XI:321014-321518	WT	ksp1-KD	OK	309.412	439.347	0.505834	3.99491	5e-05	0.000294606	yes	1.41994	No
YMR251W-A	YMR251W-A	YMR251W-A	.	.	XIII:774751-774931	WT	ksp1-KD	OK	4755.57	6749.11	0.50508	2.17994	0.0011	0.0046603	yes	1.4192	No
YOR179C	YOR179C	YOR179C	.	.	XV:671844-672411	WT	ksp1-KD	OK	151.154	214.507	0.505002	3.87648	5e-05	0.000294606	yes	1.41913	No
YGR161C	YGR161C	YGR161C	.	.	VII:808628-809420	WT	ksp1-KD	OK	274.939	390.016	0.504421	2.0253	0.00135	0.00555998	yes	1.41855	No
YMR020W	YMR020W	YMR020W	.	.	XIII:315376-316903	WT	ksp1-KD	OK	54.3639	77.0964	0.504015	2.38916	5e-05	0.000294606	yes	1.41815	No
YLR163C	YLR163C	YLR163C	.	.	XII:491865-493254	WT	ksp1-KD	OK	48.726	69.0936	0.503859	4.78698	0.0001	0.000557854	yes	1.418	No
YDR145W	YDR145W	YDR145W	.	.	IV:746737-748357	WT	ksp1-KD	OK	60.659	86.0032	0.503669	2.50677	0.0001	0.000557854	yes	1.41781	No
YGR263C	YGR263C	YGR263C	.	.	VII:1017966-1019241	WT	ksp1-KD	OK	13.1352	18.6172	0.5032	3.44977	0.0002	0.00103818	yes	1.41735	No
YIL042C	YIL042C	YIL042C	.	.	IX:275107-276292	WT	ksp1-KD	OK	53.4332	75.7251	0.503034	2.70423	0.00015	0.000804996	yes	1.41719	No
YDR523C	YDR523C	YDR523C	.	.	IV:1485565-1487038	WT	ksp1-KD	OK	2.95833	4.18945	0.501979	1.56612	0.00815	0.0252343	yes	1.41615	No
YDR079C-A	YDR079C-A	YDR079C-A	.	.	IV:603592-603811	WT	ksp1-KD	OK	299.168	423.531	0.501511	2.02369	0.0031	0.0111927	yes	1.4157	No
YER179W	YER179W	YER179W	.	.	V:548420-549517	WT	ksp1-KD	OK	16.5044	23.3642	0.501443	1.91009	0.00195	0.00759775	yes	1.41563	No
YPR083W	YPR083W	YPR083W	.	.	XVI:704853-706593	WT	ksp1-KD	OK	20.3642	28.8208	0.501073	3.46928	5e-05	0.000294606	yes	1.41527	No
YHR038W	YHR038W	YHR038W	.	.	VIII:184065-184758	WT	ksp1-KD	OK	18.6322	26.3685	0.501019	2.00115	0.0017	0.00674088	yes	1.41521	No
YKL138C	YKL138C	YKL138C	.	.	XI:185285-185681	WT	ksp1-KD	OK	115.913	164.041	0.501012	2.92992	5e-05	0.000294606	yes	1.41521	No
YDR262W	YDR262W	YDR262W	.	.	IV:993133-993952	WT	ksp1-KD	OK	368.28	520.916	0.500248	2.70387	0.00045	0.00216794	yes	1.41446	No
YOR071C	YOR071C	YOR071C	.	.	XV:459479-461276	WT	ksp1-KD	OK	7.85059	11.1036	0.500152	2.18517	0.00035	0.00171801	yes	1.41436	No
YPR002C-A	YPR002C-A	YPR002C-A	.	.	XVI:560568-560766	WT	ksp1-KD	OK	656.408	928.191	0.499829	1.97818	0.00075	0.00336852	yes	1.41405	No
YOR128C	YOR128C	YOR128C	.	.	XV:564475-566191	WT	ksp1-KD	OK	77.9174	110.004	0.497536	2.14409	0.00015	0.000804996	yes	1.4118	No
YOR338W	YOR338W	YOR338W	.	.	XV:956897-957989	WT	ksp1-KD	OK	255.713	360.997	0.49746	1.837	0.00155	0.00624516	yes	1.41173	No
YGL108C	YGL108C	YGL108C	.	.	VII:303512-304071	WT	ksp1-KD	OK	98.7377	139.289	0.496405	2.03033	0.0008	0.00354894	yes	1.41069	No
YNL165W	YNL165W	YNL165W	.	.	XIV:323831-325052	WT	ksp1-KD	OK	24.6066	34.7049	0.49609	2.41483	0.0001	0.000557854	yes	1.41039	No
YBL029C-A	YBL029C-A	YBL029C-A	.	.	II:164487-164772	WT	ksp1-KD	OK	479.913	676.845	0.496054	2.6857	5e-05	0.000294606	yes	1.41035	No
YOL010W	YOL010W	YOL010W	.	.	XV:307937-309041	WT	ksp1-KD	OK	58.4733	82.4517	0.495772	2.36424	0.00025	0.00126538	yes	1.41008	No
YJL139C	YJL139C	YJL139C	.	.	X:151712-152999	WT	ksp1-KD	OK	32.1303	45.2908	0.495281	2.64117	5e-05	0.000294606	yes	1.4096	No
YPL147W	YPL147W	YPL147W	.	.	XVI:273254-275867	WT	ksp1-KD	OK	4.4854	6.31911	0.494484	1.83661	0.00185	0.0072385	yes	1.40882	No
YBR230C	YBR230C	YBR230C	.	.	II:679548-680050	WT	ksp1-KD	OK	327.918	461.85	0.494089	2.29878	5e-05	0.000294606	yes	1.40843	No
YGR079W	YGR079W	YGR079W	.	.	VII:640719-641832	WT	ksp1-KD	OK	90.4999	127.451	0.493949	2.2467	0.0003	0.00149174	yes	1.40829	No
YKL025C	YKL025C	YKL025C	.	.	XI:390239-392279	WT	ksp1-KD	OK	27.0108	38.0385	0.493922	3.48321	5e-05	0.000294606	yes	1.40827	No
YOL025W	YOL025W	YOL025W	.	.	XV:274956-276939	WT	ksp1-KD	OK	24.1187	33.9621	0.493775	2.38216	5e-05	0.000294606	yes	1.40812	No
YGL191W	YGL191W	YGL191W	.	.	VII:144807-145197	WT	ksp1-KD	OK	935.683	1316.3	0.492393	2.0618	0.00105	0.0044806	yes	1.40678	No
YGR251W	YGR251W	YGR251W	.	.	VII:995638-996229	WT	ksp1-KD	OK	70.4986	99.1615	0.492186	2.60031	0.0002	0.00103818	yes	1.40657	No
YPL270W	YPL270W	YPL270W	.	.	XVI:30481-32803	WT	ksp1-KD	OK	33.5292	47.1317	0.49128	2.42501	5e-05	0.000294606	yes	1.40569	No
YNL129W	YNL129W	YNL129W	.	.	XIV:381479-382202	WT	ksp1-KD	OK	487.29	684.813	0.49093	2.0092	0.00115	0.00485315	yes	1.40535	No
YJL210W	YJL210W	YJL210W	.	.	X:36756-37734	WT	ksp1-KD	OK	62.2293	87.4449	0.49078	2.31856	5e-05	0.000294606	yes	1.4052	No
YGL234W	YGL234W	YGL234W	.	.	VII:56481-58890	WT	ksp1-KD	OK	111.893	157.171	0.490217	1.76226	0.0024	0.00903685	yes	1.40466	No
YLR019W	YLR019W	YLR019W	.	.	XII:180287-181481	WT	ksp1-KD	OK	62.6787	87.9479	0.488675	2.24808	0.00025	0.00126538	yes	1.40316	No
YPL168W	YPL168W	YPL168W	.	.	XVI:231216-232509	WT	ksp1-KD	OK	47.8594	67.1369	0.488303	2.43427	5e-05	0.000294606	yes	1.40279	No
YDL178W	YDL178W	YDL178W	.	.	IV:139521-141114	WT	ksp1-KD	OK	126.37	177.23	0.487974	4.18147	5e-05	0.000294606	yes	1.40247	No
YKR101W	YKR101W	YKR101W	.	.	XI:640539-642504	WT	ksp1-KD	OK	20.4331	28.6556	0.487908	2.44965	0.0001	0.000557854	yes	1.40241	No
YIR011C	YIR011C	YIR011C	.	.	IX:377286-378246	WT	ksp1-KD	OK	128.102	179.644	0.487851	2.73393	0.00015	0.000804996	yes	1.40235	No
YDL177C	YDL177C	YDL177C	.	.	IV:141208-141721	WT	ksp1-KD	OK	52.3977	73.4783	0.487813	1.91223	0.00125	0.00521757	yes	1.40232	No
YOR192C	YOR192C	YOR192C	.	.	XV:698767-700567	WT	ksp1-KD	OK	5.92018	8.30182	0.487785	2.32043	0.00105	0.0044806	yes	1.40229	No
YBR005W	YBR005W	YBR005W	.	.	II:245905-246547	WT	ksp1-KD	OK	216.17	303.121	0.487726	3.03885	0.0001	0.000557854	yes	1.40223	No
YJR101W	YJR101W	YJR101W	.	.	X:618233-619034	WT	ksp1-KD	OK	62.3017	87.3594	0.487692	2.64426	5e-05	0.000294606	yes	1.4022	No
YDR323C	YDR323C	YDR323C	.	.	IV:1112479-1114027	WT	ksp1-KD	OK	24.3736	34.1647	0.48719	2.37402	0.00015	0.000804996	yes	1.40171	No
YOL158C	YOL158C	YOL158C	.	.	XV:19490-21311	WT	ksp1-KD	OK	43.1795	60.4921	0.486401	2.33506	5e-05	0.000294606	yes	1.40095	No
YMR150C	YMR150C	YMR150C	.	.	XIII:561955-562943	WT	ksp1-KD	OK	119.79	167.809	0.486311	2.47013	0.0001	0.000557854	yes	1.40086	No
YJL206C	YJL206C	YJL206C	.	.	X:47658-49935	WT	ksp1-KD	OK	13.0205	18.2397	0.486299	2.56596	5e-05	0.000294606	yes	1.40085	No
YPL052W	YPL052W	YPL052W	.	.	XVI:458798-459678	WT	ksp1-KD	OK	99.3349	139.145	0.486214	2.32976	5e-05	0.000294606	yes	1.40076	No
YBR103W	YBR103W	YBR103W	.	.	II:447708-449316	WT	ksp1-KD	OK	98.4983	137.95	0.485975	4.55559	5e-05	0.000294606	yes	1.40053	No
YLR104W	YLR104W	YLR104W	.	.	XII:346584-346980	WT	ksp1-KD	OK	49.6619	69.5396	0.485694	2.44826	0.00015	0.000804996	yes	1.40026	No
YHR124W	YHR124W	YHR124W	.	.	VIII:356560-358444	WT	ksp1-KD	OK	8.80133	12.3139	0.484497	2.2867	0.0008	0.00354894	yes	1.3991	No
YBR137W	YBR137W	YBR137W	.	.	II:513043-513583	WT	ksp1-KD	OK	299.254	418.626	0.48429	3.09025	0.0001	0.000557854	yes	1.3989	No
YCR105W	YCR105W	YCR105W	.	.	III:309069-310155	WT	ksp1-KD	OK	9.70176	13.5651	0.483582	2.34754	0.00195	0.00759775	yes	1.39821	No
YOL055C	YOL055C	YOL055C	.	.	XV:224419-226075	WT	ksp1-KD	OK	47.7185	66.7024	0.483189	2.39245	5e-05	0.000294606	yes	1.39783	No
YLL061W	YLL061W	YLL061W	.	.	XII:17955-19707	WT	ksp1-KD	OK	36.5354	51.0352	0.482197	2.97061	5e-05	0.000294606	yes	1.39687	No
YDL045W-A	YDL045W-A	YDL045W-A	.	.	IV:372247-372535	WT	ksp1-KD	OK	113.04	157.859	0.4818	2.13352	0.0015	0.00608141	yes	1.39648	No
YBR152W	YBR152W	YBR152W	.	.	II:546375-547251	WT	ksp1-KD	OK	27.6729	38.6444	0.481785	2.47022	0.0006	0.0027833	yes	1.39647	No
YOR148C	YOR148C	YOR148C	.	.	XV:608639-609197	WT	ksp1-KD	OK	133.02	185.746	0.481689	2.89762	0.0001	0.000557854	yes	1.39638	No
YIL113W	YIL113W	YIL113W	.	.	IX:150558-151188	WT	ksp1-KD	OK	51.3004	71.6252	0.481498	2.26659	0.0001	0.000557854	yes	1.39619	No
YGR120C	YGR120C	YGR120C	.	.	VII:730032-730821	WT	ksp1-KD	OK	40.5049	56.5486	0.481397	2.24468	0.0002	0.00103818	yes	1.39609	No
YLR276C	YLR276C	YLR276C	.	.	XII:695045-696830	WT	ksp1-KD	OK	97.6457	136.303	0.481188	1.9556	0.00085	0.00373758	yes	1.39589	No
YPL108W	YPL108W	YPL108W	.	.	XVI:348445-348952	WT	ksp1-KD	OK	41.7377	58.2049	0.47979	1.92907	0.00275	0.0100859	yes	1.39454	No
YML081C-A	YML081C-A	YML081C-A	.	.	XIII:103982-104162	WT	ksp1-KD	OK	2098.07	2925.72	0.479725	3.07547	0.0001	0.000557854	yes	1.39448	No
YLR038C	YLR038C	YLR038C	.	.	XII:224920-225172	WT	ksp1-KD	OK	1132.71	1579.5	0.479686	2.72161	0.00025	0.00126538	yes	1.39444	No
YHR147C	YHR147C	YHR147C	.	.	VIII:392638-393283	WT	ksp1-KD	OK	44.6081	62.1965	0.479526	2.59434	0.00025	0.00126538	yes	1.39429	No
YNL286W	YNL286W	YNL286W	.	.	XIV:95222-96080	WT	ksp1-KD	OK	86.4762	120.564	0.479428	3.39245	5e-05	0.000294606	yes	1.39419	No
YDR432W	YDR432W	YDR432W	.	.	IV:1328782-1330040	WT	ksp1-KD	OK	311.161	433.807	0.479394	1.82501	0.00445	0.0152374	yes	1.39416	No
YBL039W-B	YBL039W-B	YBL039W-B	.	.	II:143392-143572	WT	ksp1-KD	OK	412.172	574.464	0.47897	1.76551	0.00825	0.0254832	yes	1.39375	No
YER054C	YER054C	YER054C	.	.	V:262051-263698	WT	ksp1-KD	OK	10.275	14.3095	0.477838	3.02182	0.00085	0.00373758	yes	1.39266	No
YBL064C	YBL064C	YBL064C	.	.	II:100370-101156	WT	ksp1-KD	OK	352.105	490.298	0.477655	1.75757	0.00225	0.00854632	yes	1.39248	No
YCL058W-A	YCL058W-A	YCL058W-A	.	.	III:23522-23981	WT	ksp1-KD	OK	544.931	758.676	0.477411	3.54673	0.00155	0.00624516	yes	1.39224	No
YER026C	YER026C	YER026C	.	.	V:207643-208474	WT	ksp1-KD	OK	531.154	739.464	0.47735	2.31812	0.00265	0.00978543	yes	1.39218	No
YDL065C	YDL065C	YDL065C	.	.	IV:336248-337277	WT	ksp1-KD	OK	391.056	544.409	0.477317	7.51958	5e-05	0.000294606	yes	1.39215	No
YDR162C	YDR162C	YDR162C	.	.	IV:780389-781100	WT	ksp1-KD	OK	99.9123	139.036	0.476723	2.37009	5e-05	0.000294606	yes	1.39158	No
YBR126W-B	YBR126W-B	YBR126W-B	.	.	II:490849-491070	WT	ksp1-KD	OK	1863.33	2592.78	0.476611	2.13387	0.0065	0.0209645	yes	1.39147	No
YPL096C-A	YPL096C-A	YPL096C-A	.	.	XVI:366528-366735	WT	ksp1-KD	OK	207.167	288.257	0.47656	2.26562	0.00505	0.016935	yes	1.39142	No
YBR253W	YBR253W	YBR253W	.	.	II:723269-723635	WT	ksp1-KD	OK	419.532	583.601	0.476201	4.082	0.0002	0.00103818	yes	1.39108	No
YDR482C	YDR482C	YDR482C	.	.	IV:1420430-1420838	WT	ksp1-KD	OK	390.247	542.491	0.47521	4.88036	0.0001	0.000557854	yes	1.39012	No
YPR151C	YPR151C	YPR151C	.	.	XVI:830998-831675	WT	ksp1-KD	OK	83.29	115.778	0.475151	2.6156	0.0004	0.00194581	yes	1.39006	No
YCR026C	YCR026C	YCR026C	.	.	III:164110-166339	WT	ksp1-KD	OK	69.5488	96.6726	0.475082	2.0424	0.00015	0.000804996	yes	1.39	No
YDR065W	YDR065W	YDR065W	.	.	IV:580686-581784	WT	ksp1-KD	OK	39.8971	55.4476	0.474839	2.26232	0.00015	0.000804996	yes	1.38976	No
YNL189W	YNL189W	YNL189W	.	.	XIV:284259-285888	WT	ksp1-KD	OK	238.359	331.182	0.474488	1.8468	0.00345	0.0122522	yes	1.38943	No
YHR006W	YHR006W	YHR006W	.	.	VIII:117813-119439	WT	ksp1-KD	OK	62.9869	87.3626	0.471964	2.83869	0.00035	0.00171801	yes	1.387	No
YER092W	YER092W	YER092W	.	.	V:342854-343232	WT	ksp1-KD	OK	730.549	1013	0.471588	3.87353	0.0002	0.00103818	yes	1.38663	No
YCR027C	YCR027C	YCR027C	.	.	III:167369-167999	WT	ksp1-KD	OK	69.8799	96.8206	0.470436	2.26595	5e-05	0.000294606	yes	1.38553	No
YJR152W	YJR152W	YJR152W	.	.	X:719665-721297	WT	ksp1-KD	OK	3255.91	4510.39	0.470194	1.41052	0.01705	0.0466953	yes	1.3853	No
YJR096W	YJR096W	YJR096W	.	.	X:611194-612043	WT	ksp1-KD	OK	204.922	283.875	0.470186	2.0214	0.00055	0.00257711	yes	1.38529	No
YLR291C	YLR291C	YLR291C	.	.	XII:718316-719462	WT	ksp1-KD	OK	87.9208	121.759	0.469756	2.31672	0.00015	0.000804996	yes	1.38488	No
YOR205C	YOR205C	YOR205C	.	.	XV:725563-727234	WT	ksp1-KD	OK	21.1213	29.2453	0.469507	2.22538	5e-05	0.000294606	yes	1.38464	No
YPR131C	YPR131C	YPR131C	.	.	XVI:793910-794498	WT	ksp1-KD	OK	61.8382	85.5834	0.468833	2.20039	0.0002	0.00103818	yes	1.38399	No
YGR044C	YGR044C	YGR044C	.	.	VII:582989-583892	WT	ksp1-KD	OK	23.1499	32.0345	0.468621	2.4569	0.0003	0.00149174	yes	1.38379	No
YDL072C	YDL072C	YDL072C	.	.	IV:329835-330447	WT	ksp1-KD	OK	288.928	399.813	0.468615	1.98197	0.00125	0.00521757	yes	1.38378	No
YPL104W	YPL104W	YPL104W	.	.	XVI:355699-357676	WT	ksp1-KD	OK	16.5358	22.8792	0.468441	2.30137	0.00065	0.00297909	yes	1.38361	No
YPR037C	YPR037C	YPR037C	.	.	XVI:646447-648375	WT	ksp1-KD	OK	238.218	329.581	0.468348	2.34213	0.01325	0.0379514	yes	1.38352	No
YOR113W	YOR113W	YOR113W	.	.	XV:534074-536819	WT	ksp1-KD	OK	14.4091	19.9321	0.468111	2.33709	5e-05	0.000294606	yes	1.3833	No
YGR057C	YGR057C	YGR057C	.	.	VII:604772-605501	WT	ksp1-KD	OK	85.4152	118.153	0.468088	2.2662	5e-05	0.000294606	yes	1.38328	No
YGR240C-A	YGR240C-A	YGR240C-A	.	.	VII:974576-974777	WT	ksp1-KD	OK	306.546	423.473	0.466167	1.6239	0.006	0.0196344	yes	1.38143	No
YMR178W	YMR178W	YMR178W	.	.	XIII:618478-619303	WT	ksp1-KD	OK	116.614	161.077	0.466009	2.64268	0.0003	0.00149174	yes	1.38128	No
YHR176W	YHR176W	YHR176W	.	.	VIII:454228-455527	WT	ksp1-KD	OK	27.4896	37.9605	0.465611	2.22211	5e-05	0.000294606	yes	1.3809	No
YFL021W	YFL021W	YFL021W	.	.	VI:95760-97498	WT	ksp1-KD	OK	79.9207	110.339	0.465307	1.81495	0.0013	0.0053882	yes	1.38061	No
YBR126W-A	YBR126W-A	YBR126W-A	.	.	II:490849-491070	WT	ksp1-KD	OK	380.196	524.783	0.464978	1.56181	0.0169	0.0463431	yes	1.3803	No
YOL143C	YOL143C	YOL143C	.	.	XV:54594-55104	WT	ksp1-KD	OK	456.436	629.953	0.464829	2.72274	0.0003	0.00149174	yes	1.38015	No
YJL212C	YJL212C	YJL212C	.	.	X:33849-36249	WT	ksp1-KD	OK	84.6382	116.81	0.464779	2.01245	0.00345	0.0122522	yes	1.38011	No
YFR017C	YFR017C	YFR017C	.	.	VI:182273-182861	WT	ksp1-KD	OK	32.9598	45.4547	0.463723	2.00501	0.00125	0.00521757	yes	1.3791	No
YBR295W	YBR295W	YBR295W	.	.	II:792848-796499	WT	ksp1-KD	OK	24.4275	33.6758	0.463203	2.0464	0.00045	0.00216794	yes	1.3786	No
YOR076C	YOR076C	YOR076C	.	.	XV:469376-471620	WT	ksp1-KD	OK	20.7602	28.6103	0.462713	2.27785	0.00015	0.000804996	yes	1.37813	No
YKL023C-A	YKL023C-A	YKL023C-A	.	.	XI:393145-393373	WT	ksp1-KD	OK	143.37	197.546	0.462446	2.08728	0.0041	0.014196	yes	1.37788	No
YLR407W	YLR407W	YLR407W	.	.	XII:932966-933653	WT	ksp1-KD	OK	99.6688	137.308	0.462197	2.7958	0.00015	0.000804996	yes	1.37764	No
YLR223C	YLR223C	YLR223C	.	.	XII:582005-585490	WT	ksp1-KD	OK	40.8138	56.2222	0.462082	1.95118	0.00055	0.00257711	yes	1.37753	No
YDL168W	YDL168W	YDL168W	.	.	IV:159603-160764	WT	ksp1-KD	OK	98.5175	135.683	0.461793	2.13067	0.0003	0.00149174	yes	1.37725	No
YLR007W	YLR007W	YLR007W	.	.	XII:164391-165402	WT	ksp1-KD	OK	77.0091	105.99	0.460834	2.35791	0.0003	0.00149174	yes	1.37634	No
YJL046W	YJL046W	YJL046W	.	.	X:352385-353615	WT	ksp1-KD	OK	42.2121	58.0894	0.460617	2.19772	0.00015	0.000804996	yes	1.37613	No
YNL095C	YNL095C	YNL095C	.	.	XIV:444911-446840	WT	ksp1-KD	OK	20.3059	27.9236	0.45959	2.26638	0.0001	0.000557854	yes	1.37515	No
YGR183C	YGR183C	YGR183C	.	.	VII:859062-859476	WT	ksp1-KD	OK	1440.51	1980.62	0.459374	2.28422	0.00015	0.000804996	yes	1.37495	No
YAR015W	YAR015W	YAR015W	.	.	I:169374-170295	WT	ksp1-KD	OK	253.584	348.521	0.45878	1.78962	0.0023	0.00871078	yes	1.37438	No
YOR269W	YOR269W	YOR269W	.	.	XV:826384-827869	WT	ksp1-KD	OK	15.5335	21.3487	0.458766	2.02256	0.00065	0.00297909	yes	1.37437	No
YNL122C	YNL122C	YNL122C	.	.	XIV:398022-398370	WT	ksp1-KD	OK	44.2839	60.8498	0.458472	2.89542	0.0065	0.0209645	yes	1.37409	No
YLR079W	YLR079W	YLR079W	.	.	XII:286819-287674	WT	ksp1-KD	OK	96.1837	132.163	0.458457	2.15127	0.0005	0.00238233	yes	1.37407	No
YNL024C-A	YNL024C-A	YNL024C-A	.	.	XIV:586601-586820	WT	ksp1-KD	OK	417.99	574.047	0.4577	2.72026	0.0007	0.00317245	yes	1.37335	No
YPL213W	YPL213W	YPL213W	.	.	XVI:150613-151330	WT	ksp1-KD	OK	108.232	148.639	0.457684	3.218	0.00035	0.00171801	yes	1.37334	No
YLR107W	YLR107W	YLR107W	.	.	XII:364115-365330	WT	ksp1-KD	OK	58.287	80.0464	0.457663	2.56663	0.00015	0.000804996	yes	1.37332	No
YGR129W	YGR129W	YGR129W	.	.	VII:750399-751047	WT	ksp1-KD	OK	40.8236	56.0608	0.45759	1.87292	0.0021	0.00808046	yes	1.37325	No
YHR044C	YHR044C	YHR044C	.	.	VIII:194067-194808	WT	ksp1-KD	OK	48.9674	67.2439	0.457581	3.03362	0.0017	0.00674088	yes	1.37324	No
YOR363C	YOR363C	YOR363C	.	.	XV:1020221-1023212	WT	ksp1-KD	OK	24.6293	33.8107	0.457102	2.11718	0.00025	0.00126538	yes	1.37278	No
YML009C	YML009C	YML009C	.	.	XIII:251303-251516	WT	ksp1-KD	OK	266.202	365.345	0.456737	1.79885	0.0091	0.0276101	yes	1.37243	No
YLL048C	YLL048C	YLL048C	.	.	XII:41279-46265	WT	ksp1-KD	OK	42.7097	58.6063	0.456492	1.73856	0.00245	0.00919847	yes	1.3722	No
YBL090W	YBL090W	YBL090W	.	.	II:48824-49358	WT	ksp1-KD	OK	92.7314	127.241	0.456434	2.21362	0.00035	0.00171801	yes	1.37215	No
YLR168C	YLR168C	YLR168C	.	.	XII:499577-500270	WT	ksp1-KD	OK	203.305	278.846	0.455823	3.13153	5e-05	0.000294606	yes	1.37157	No
YHL029C	YHL029C	YHL029C	.	.	VIII:45928-47968	WT	ksp1-KD	OK	38.8926	53.3281	0.455401	2.26445	0.0005	0.00238233	yes	1.37116	No
YDR257C	YDR257C	YDR257C	.	.	IV:969989-971474	WT	ksp1-KD	OK	53.2867	73.0518	0.455144	2.45938	0.0001	0.000557854	yes	1.37092	No
YGR015C	YGR015C	YGR015C	.	.	VII:521089-522076	WT	ksp1-KD	OK	12.0632	16.5352	0.454927	2.09199	0.00305	0.0110306	yes	1.37071	No
YBL099W	YBL099W	YBL099W	.	.	II:36988-38690	WT	ksp1-KD	OK	431.607	591.548	0.454775	1.6544	0.01165	0.033937	yes	1.37057	No
YNL004W	YNL004W	YNL004W	.	.	XIV:622914-624621	WT	ksp1-KD	OK	331.873	454.781	0.454541	2.44332	0.00275	0.0100859	yes	1.37035	No
YBR257W	YBR257W	YBR257W	.	.	II:728884-729724	WT	ksp1-KD	OK	103.427	141.722	0.454446	2.46699	0.00015	0.000804996	yes	1.37026	No
YKL051W	YKL051W	YKL051W	.	.	XI:341311-342373	WT	ksp1-KD	OK	117.829	161.415	0.454083	1.99937	0.0017	0.00674088	yes	1.36991	No
YML079W	YML079W	YML079W	.	.	XIII:110246-110852	WT	ksp1-KD	OK	317.176	434.486	0.454028	2.40053	0.00015	0.000804996	yes	1.36986	No
YJR085C	YJR085C	YJR085C	.	.	X:585119-585437	WT	ksp1-KD	OK	1271.32	1741.34	0.45387	3.14179	0.00025	0.00126538	yes	1.36971	No
YOR059C	YOR059C	YOR059C	.	.	XV:438905-440258	WT	ksp1-KD	OK	136.636	187.148	0.453848	2.26677	0.00075	0.00336852	yes	1.36969	No
YPL157W	YPL157W	YPL157W	.	.	XVI:254813-255761	WT	ksp1-KD	OK	46.0237	63.0353	0.453782	2.82545	5e-05	0.000294606	yes	1.36963	No
YOR350C	YOR350C	YOR350C	.	.	XV:992863-994855	WT	ksp1-KD	OK	27.3858	37.5079	0.453766	2.50077	0.0002	0.00103818	yes	1.36961	No
YOL144W	YOL144W	YOL144W	.	.	XV:53097-54552	WT	ksp1-KD	OK	53.5402	73.2901	0.452994	2.93158	0.00035	0.00171801	yes	1.36888	No
YLR128W	YLR128W	YLR128W	.	.	XII:398529-399433	WT	ksp1-KD	OK	35.9483	49.2053	0.45289	1.8775	0.0013	0.0053882	yes	1.36878	No
YHR210C	YHR210C	YHR210C	.	.	VIII:520711-521737	WT	ksp1-KD	OK	5.18308	7.09414	0.452818	1.70294	0.013	0.0373671	yes	1.36871	No
YOR097C	YOR097C	YOR097C	.	.	XV:506977-507505	WT	ksp1-KD	OK	143.425	196.305	0.452802	3.54441	0.0007	0.00317245	yes	1.3687	No
YOR028C	YOR028C	YOR028C	.	.	XV:383532-384420	WT	ksp1-KD	OK	23.2489	31.8197	0.452762	2.40245	0.00035	0.00171801	yes	1.36866	No
YPR086W	YPR086W	YPR086W	.	.	XVI:710100-711138	WT	ksp1-KD	OK	118.556	162.223	0.452414	2.12771	0.00035	0.00171801	yes	1.36833	No
YDL216C	YDL216C	YDL216C	.	.	IV:68996-70319	WT	ksp1-KD	OK	24.7218	33.8235	0.452242	2.18244	0.0007	0.00317245	yes	1.36816	No
YML129C	YML129C	YML129C	.	.	XIII:14540-14753	WT	ksp1-KD	OK	750.076	1026.14	0.452114	2.56685	0.00535	0.0177668	yes	1.36804	No
YER004W	YER004W	YER004W	.	.	V:159579-160275	WT	ksp1-KD	OK	829.953	1134.77	0.451298	2.78866	0.0041	0.014196	yes	1.36727	No
YDL098C	YDL098C	YDL098C	.	.	IV:284580-285165	WT	ksp1-KD	OK	54.594	74.6343	0.451095	1.94147	0.0029	0.0105586	yes	1.36708	No
YLR246W	YLR246W	YLR246W	.	.	XII:627117-628197	WT	ksp1-KD	OK	130.099	177.848	0.451033	2.0993	0.0007	0.00317245	yes	1.36702	No
YGL142C	YGL142C	YGL142C	.	.	VII:236268-238119	WT	ksp1-KD	OK	23.4808	32.0949	0.450861	4.18015	0.0002	0.00103818	yes	1.36686	No
YOR101W	YOR101W	YOR101W	.	.	XV:515243-516173	WT	ksp1-KD	OK	102.769	140.454	0.450697	2.81057	0.0001	0.000557854	yes	1.3667	No
YLR387C	YLR387C	YLR387C	.	.	XII:896373-897672	WT	ksp1-KD	OK	115.593	157.938	0.450305	2.10796	0.0013	0.0053882	yes	1.36633	No
YPL271W	YPL271W	YPL271W	.	.	XVI:30078-30267	WT	ksp1-KD	OK	2196.71	3001.05	0.450121	2.51106	0.0001	0.000557854	yes	1.36615	No
YOR124C	YOR124C	YOR124C	.	.	XV:554823-558642	WT	ksp1-KD	OK	27.2734	37.2505	0.449762	2.06272	0.0005	0.00238233	yes	1.36581	No
YBL107C	YBL107C	YBL107C	.	.	II:9960-10551	WT	ksp1-KD	OK	96.3246	131.424	0.448253	2.15945	0.0002	0.00103818	yes	1.36439	No
YKR041W	YKR041W	YKR041W	.	.	XI:518062-518950	WT	ksp1-KD	OK	18.1289	24.7217	0.447486	1.88176	0.00625	0.0203399	yes	1.36366	No
YLR180W	YLR180W	YLR180W	.	.	XII:515261-516410	WT	ksp1-KD	OK	545.699	743.198	0.445641	1.43515	0.01205	0.03493	yes	1.36192	No
YGL004C	YGL004C	YGL004C	.	.	VII:490702-491956	WT	ksp1-KD	OK	55.5835	75.6738	0.445137	2.84194	0.0001	0.000557854	yes	1.36144	No
YDL243C	YDL243C	YDL243C	.	.	IV:17576-18566	WT	ksp1-KD	OK	29.205	39.7426	0.444467	1.97779	0.0006	0.0027833	yes	1.36081	No
YGL085W	YGL085W	YGL085W	.	.	VII:349615-350440	WT	ksp1-KD	OK	31.1584	42.3989	0.444405	2.45215	0.00025	0.00126538	yes	1.36075	No
YDR357C	YDR357C	YDR357C	.	.	IV:1189198-1189567	WT	ksp1-KD	OK	155.348	211.37	0.444274	2.10144	0.0004	0.00194581	yes	1.36063	No
YDR249C	YDR249C	YDR249C	.	.	IV:958680-959802	WT	ksp1-KD	OK	24.8418	33.8	0.444254	1.99048	0.00165	0.00659493	yes	1.36061	No
YLR008C	YLR008C	YLR008C	.	.	XII:165576-166083	WT	ksp1-KD	OK	76.6957	104.337	0.444028	2.08057	0.0007	0.00317245	yes	1.3604	No
YKL169C	YKL169C	YKL169C	.	.	XI:130633-131068	WT	ksp1-KD	OK	68.7639	93.5343	0.443844	1.84698	0.0008	0.00354894	yes	1.36022	No
YBR236C	YBR236C	YBR236C	.	.	II:690382-691693	WT	ksp1-KD	OK	43.2558	58.8225	0.443475	2.17544	0.0003	0.00149174	yes	1.35988	No
YMR200W	YMR200W	YMR200W	.	.	XIII:664751-665522	WT	ksp1-KD	OK	207.672	282.337	0.443109	1.93927	0.0012	0.00503148	yes	1.35953	No
YBR254C	YBR254C	YBR254C	.	.	II:723735-724263	WT	ksp1-KD	OK	192.394	261.464	0.442546	2.76455	0.0003	0.00149174	yes	1.359	No
YGL119W	YGL119W	YGL119W	.	.	VII:284441-285947	WT	ksp1-KD	OK	29.535	40.1215	0.441952	2.14422	0.00035	0.00171801	yes	1.35844	No
YHR181W	YHR181W	YHR181W	.	.	VIII:467227-467914	WT	ksp1-KD	OK	53.6628	72.8773	0.441546	13.7826	0.0002	0.00103818	yes	1.35806	No
YLL038C	YLL038C	YLL038C	.	.	XII:65774-66518	WT	ksp1-KD	OK	71.4647	97.0491	0.441485	2.43226	0.00075	0.00336852	yes	1.358	No
YDR406W	YDR406W	YDR406W	.	.	IV:1279209-1284044	WT	ksp1-KD	OK	10.5165	14.2812	0.441466	2.13263	0.0003	0.00149174	yes	1.35798	No
YBR019C	YBR019C	YBR019C	.	.	II:276252-278352	WT	ksp1-KD	OK	3.93387	5.34204	0.441442	1.79219	0.0075	0.0236614	yes	1.35796	No
YMR111C	YMR111C	YMR111C	.	.	XIII:492403-493792	WT	ksp1-KD	OK	17.032	23.1148	0.440571	2.04289	0.0014	0.00574044	yes	1.35714	No
YLR421C	YLR421C	YLR421C	.	.	XII:965089-965560	WT	ksp1-KD	OK	374.412	507.775	0.43956	2.01872	0.00065	0.00297909	yes	1.35619	No
YFR025C	YFR025C	YFR025C	.	.	VI:203742-204750	WT	ksp1-KD	OK	202.279	274.129	0.438503	1.75237	0.00285	0.0104116	yes	1.3552	No
YPL178W	YPL178W	YPL178W	.	.	XVI:212157-212784	WT	ksp1-KD	OK	251.537	340.868	0.438442	2.11354	0.00065	0.00297909	yes	1.35514	No
YGR053C	YGR053C	YGR053C	.	.	VII:594985-595837	WT	ksp1-KD	OK	11.2787	15.283	0.438325	1.45777	0.0115	0.0336206	yes	1.35503	No
YOR189W	YOR189W	YOR189W	.	.	XV:689623-689974	WT	ksp1-KD	OK	216.85	293.738	0.437833	2.25076	0.00045	0.00216794	yes	1.35457	No
YOR316C	YOR316C	YOR316C	.	.	XV:906235-907555	WT	ksp1-KD	OK	68.754	93.114	0.437555	2.03149	0.0007	0.00317245	yes	1.35431	No
YML108W	YML108W	YML108W	.	.	XIII:54792-55110	WT	ksp1-KD	OK	806.814	1092.38	0.437162	4.39501	0.0008	0.00354894	yes	1.35394	No
YDR351W	YDR351W	YDR351W	.	.	IV:1178665-1181260	WT	ksp1-KD	OK	16.6778	22.5761	0.436866	2.59176	0.00025	0.00126538	yes	1.35366	No
YOL095C	YOL095C	YOL095C	.	.	XV:139226-141347	WT	ksp1-KD	OK	10.9475	14.817	0.436644	2.08653	0.00055	0.00257711	yes	1.35345	No
YHR109W	YHR109W	YHR109W	.	.	VIII:330309-332067	WT	ksp1-KD	OK	14.4511	19.5545	0.436317	1.92653	0.00055	0.00257711	yes	1.35315	No
YHR182W	YHR182W	YHR182W	.	.	VIII:468218-470576	WT	ksp1-KD	OK	15.4695	20.9245	0.435771	2.17514	0.00055	0.00257711	yes	1.35263	No
YHR142W	YHR142W	YHR142W	.	.	VIII:383537-384488	WT	ksp1-KD	OK	64.0544	86.6421	0.43577	2.51295	0.0003	0.00149174	yes	1.35263	No
YEL030W	YEL030W	YEL030W	.	.	V:94582-96578	WT	ksp1-KD	OK	9.53159	12.8927	0.435763	1.89607	0.00145	0.0059156	yes	1.35263	No
YJR135C	YJR135C	YJR135C	.	.	X:676058-676778	WT	ksp1-KD	OK	33.5108	45.3251	0.435687	1.91497	0.0037	0.0130332	yes	1.35255	No
YPL051W	YPL051W	YPL051W	.	.	XVI:459962-460559	WT	ksp1-KD	OK	182.342	246.578	0.435397	4.05898	0.00035	0.00171801	yes	1.35228	No
YBR166C	YBR166C	YBR166C	.	.	II:569841-571200	WT	ksp1-KD	OK	152.826	206.593	0.434901	2.71746	0.0003	0.00149174	yes	1.35182	No
YFL056C	YFL056C	YFL056C	.	.	VI:14304-15431	WT	ksp1-KD	OK	4.57645	6.18648	0.434889	1.33734	0.0182	0.0493252	yes	1.35181	No
YPR017C	YPR017C	YPR017C	.	.	XVI:593485-593917	WT	ksp1-KD	OK	193.417	261.46	0.434873	4.16764	0.0032	0.0114899	yes	1.35179	No
YDL244W	YDL244W	YDL244W	.	.	IV:16203-17226	WT	ksp1-KD	OK	6.93311	9.37152	0.434781	1.4198	0.01415	0.0400526	yes	1.35171	No
YGR191W	YGR191W	YGR191W	.	.	VII:880295-882231	WT	ksp1-KD	OK	76.7716	103.763	0.434646	1.76962	0.0024	0.00903685	yes	1.35158	No
YGL091C	YGL091C	YGL091C	.	.	VII:342055-343042	WT	ksp1-KD	OK	145.863	197.099	0.434308	3.58063	0.0002	0.00103818	yes	1.35126	No
YDR148C	YDR148C	YDR148C	.	.	IV:753674-755066	WT	ksp1-KD	OK	168.164	227.199	0.434087	1.96509	0.0057	0.0187661	yes	1.35106	No
YFR045W	YFR045W	YFR045W	.	.	VI:241997-242999	WT	ksp1-KD	OK	33.5098	45.2615	0.4337	2.00764	0.0006	0.0027833	yes	1.35069	No
YOR091W	YOR091W	YOR091W	.	.	XV:493432-494470	WT	ksp1-KD	OK	103.617	139.944	0.433593	2.43423	0.00065	0.00297909	yes	1.35059	No
YIR038C	YIR038C	YIR038C	.	.	IX:423808-424513	WT	ksp1-KD	OK	634.437	856.634	0.433202	1.67383	0.0066	0.0212449	yes	1.35023	No
YOL110W	YOL110W	YOL110W	.	.	XV:109175-109889	WT	ksp1-KD	OK	69.4917	93.829	0.433192	2.40707	0.00055	0.00257711	yes	1.35022	No
YDR347W	YDR347W	YDR347W	.	.	IV:1169177-1170143	WT	ksp1-KD	OK	47.0445	63.4781	0.432234	2.16168	0.0003	0.00149174	yes	1.34932	No
YPR180W	YPR180W	YPR180W	.	.	XVI:895960-897004	WT	ksp1-KD	OK	156.61	211.313	0.432204	3.56409	0.0004	0.00194581	yes	1.34929	No
YDR260C	YDR260C	YDR260C	.	.	IV:976716-977229	WT	ksp1-KD	OK	182.27	245.928	0.432159	2.22575	0.00025	0.00126538	yes	1.34925	No
YNL261W	YNL261W	YNL261W	.	.	XIV:155099-156539	WT	ksp1-KD	OK	30.6463	41.348	0.432106	2.09935	0.00045	0.00216794	yes	1.3492	No
YER064C	YER064C	YER064C	.	.	V:282704-284222	WT	ksp1-KD	OK	7.08015	9.55236	0.432076	1.65658	0.0049	0.0165343	yes	1.34917	No
YER162C	YER162C	YER162C	.	.	V:500629-502894	WT	ksp1-KD	OK	40.5216	54.6684	0.432015	3.0263	0.00025	0.00126538	yes	1.34912	No
YGR036C	YGR036C	YGR036C	.	.	VII:558148-558868	WT	ksp1-KD	OK	38.8365	52.3844	0.431724	1.87074	0.00125	0.00521757	yes	1.34884	No
YDL237W	YDL237W	YDL237W	.	.	IV:30656-31829	WT	ksp1-KD	OK	79.6379	107.381	0.431214	1.99605	0.00095	0.00409691	yes	1.34837	No
YGL263W	YGL263W	YGL263W	.	.	VII:2789-3932	WT	ksp1-KD	OK	6.11826	8.24483	0.43037	1.4545	0.0159	0.0440845	yes	1.34758	No
YJL048C	YJL048C	YJL048C	.	.	X:347446-348637	WT	ksp1-KD	OK	125.736	169.409	0.430107	1.90937	0.0041	0.014196	yes	1.34733	No
YLR376C	YLR376C	YLR376C	.	.	XII:872825-873554	WT	ksp1-KD	OK	17.4128	23.4529	0.429618	2.04817	0.0049	0.0165343	yes	1.34688	No
YDR452W	YDR452W	YDR452W	.	.	IV:1362877-1364902	WT	ksp1-KD	OK	46.8775	63.1279	0.429384	2.40227	0.00205	0.00790211	yes	1.34666	No
YPL117C	YPL117C	YPL117C	.	.	XVI:327863-328730	WT	ksp1-KD	OK	577.794	777.739	0.428729	1.53714	0.0093	0.0280077	yes	1.34605	No
YGR068C	YGR068C	YGR068C	.	.	VII:625323-627418	WT	ksp1-KD	OK	17.6783	23.7952	0.428689	2.02456	0.00065	0.00297909	yes	1.34601	No
YJL163C	YJL163C	YJL163C	.	.	X:111665-113333	WT	ksp1-KD	OK	47.1199	63.4082	0.428335	2.15777	0.0003	0.00149174	yes	1.34568	No
YDR340W	YDR340W	YDR340W	.	.	IV:1150841-1151183	WT	ksp1-KD	OK	155.93	209.829	0.428319	1.74275	0.004	0.0139464	yes	1.34566	No
YJL025W	YJL025W	YJL025W	.	.	X:393966-395511	WT	ksp1-KD	OK	12.9218	17.3629	0.426204	3.01826	0.00135	0.00555998	yes	1.34369	No
YBL071C	YBL071C	YBL071C	.	.	II:89977-90531	WT	ksp1-KD	OK	322.001	432.636	0.426085	1.53699	0.0095	0.028465	yes	1.34358	No
YMR211W	YMR211W	YMR211W	.	.	XIII:689082-690510	WT	ksp1-KD	OK	20.2367	27.1826	0.425708	1.96414	0.0009	0.00392031	yes	1.34323	No
YHR143W-A	YHR143W-A	YHR143W-A	.	.	VIII:387232-387445	WT	ksp1-KD	OK	190.612	256.034	0.425693	1.54126	0.01015	0.0302591	yes	1.34322	No
YDR204W	YDR204W	YDR204W	.	.	IV:858136-859144	WT	ksp1-KD	OK	63.3304	85.0641	0.425651	2.41054	0.00055	0.00257711	yes	1.34318	No
YNL264C	YNL264C	YNL264C	.	.	XIV:145562-146615	WT	ksp1-KD	OK	89.6221	120.36	0.425429	2.82683	0.00045	0.00216794	yes	1.34297	No
YDR018C	YDR018C	YDR018C	.	.	IV:482669-483860	WT	ksp1-KD	OK	10.494	14.0921	0.425314	1.63431	0.00995	0.0297174	yes	1.34286	No
YNL164C	YNL164C	YNL164C	.	.	XIV:325264-326320	WT	ksp1-KD	OK	67.876	91.1299	0.425023	2.09171	0.0006	0.0027833	yes	1.34259	No
YHL038C	YHL038C	YHL038C	.	.	VIII:23616-25509	WT	ksp1-KD	OK	15.5329	20.8507	0.424765	1.96402	0.0007	0.00317245	yes	1.34235	No
YKL184W	YKL184W	YKL184W	.	.	XI:96756-98157	WT	ksp1-KD	OK	34.3522	46.1104	0.424688	2.02331	0.0004	0.00194581	yes	1.34228	No
YDR376W	YDR376W	YDR376W	.	.	IV:1226821-1228303	WT	ksp1-KD	OK	38.4258	51.5561	0.42407	2.33297	0.00045	0.00216794	yes	1.34171	No
YER089C	YER089C	YER089C	.	.	V:335695-337340	WT	ksp1-KD	OK	114.256	153.26	0.423714	1.55151	0.00885	0.0270029	yes	1.34138	No
YKL219W	YKL219W	YKL219W	.	.	XI:14484-15708	WT	ksp1-KD	OK	18.3329	24.5905	0.423666	1.92204	0.00095	0.00409691	yes	1.34133	No
YBL025W	YBL025W	YBL025W	.	.	II:171480-171918	WT	ksp1-KD	OK	115.049	154.295	0.423442	2.01218	0.00405	0.0140904	yes	1.34112	No
YBL057C	YBL057C	YBL057C	.	.	II:112800-113427	WT	ksp1-KD	OK	75.4659	101.174	0.422936	2.03828	0.0005	0.00238233	yes	1.34065	No
YOR257W	YOR257W	YOR257W	.	.	XV:811007-811493	WT	ksp1-KD	OK	301.213	403.407	0.421453	3.10986	0.00055	0.00257711	yes	1.33928	No
YGL171W	YGL171W	YGL171W	.	.	VII:182389-184084	WT	ksp1-KD	OK	95.2065	127.486	0.421206	2.94532	0.0007	0.00317245	yes	1.33905	No
YGL208W	YGL208W	YGL208W	.	.	VII:97337-98585	WT	ksp1-KD	OK	16.9524	22.6925	0.420728	3.66465	0.00065	0.00297909	yes	1.3386	No
snR86	snR86	snR86	.	.	XIII:762109-763113	WT	ksp1-KD	OK	37.2322	49.8048	0.419736	2.4622	0.00025	0.00126538	yes	1.33768	No
YHR106W	YHR106W	YHR106W	.	.	VIII:325597-326626	WT	ksp1-KD	OK	59.8118	80.0092	0.419735	2.02804	0.00025	0.00126538	yes	1.33768	No
YDR366C	YDR366C	YDR366C	.	.	IV:1212437-1212836	WT	ksp1-KD	OK	530.43	709.051	0.418727	1.92483	0.00215	0.00823871	yes	1.33675	No
YFR020W	YFR020W	YFR020W	.	.	VI:192736-193435	WT	ksp1-KD	OK	34.9408	46.7042	0.41864	1.78244	0.004	0.0139464	yes	1.33667	No
YNL083W	YNL083W	YNL083W	.	.	XIV:471376-472861	WT	ksp1-KD	OK	30.628	40.9275	0.418222	2.46283	0.0006	0.0027833	yes	1.33628	No
YGL079W	YGL079W	YGL079W	.	.	VII:359443-360100	WT	ksp1-KD	OK	61.8655	82.6535	0.417942	2.12967	0.0011	0.0046603	yes	1.33602	No
YJR050W	YJR050W	YJR050W	.	.	X:528696-529404	WT	ksp1-KD	OK	182.962	244.432	0.417888	3.81523	0.00065	0.00297909	yes	1.33597	No
YDL004W	YDL004W	YDL004W	.	.	IV:443028-443511	WT	ksp1-KD	OK	622.198	831.097	0.417643	2.31799	0.0017	0.00674088	yes	1.33574	No
YHR008C	YHR008C	YHR008C	.	.	VIII:122888-123590	WT	ksp1-KD	OK	330.239	440.888	0.416901	1.57456	0.0092	0.0277838	yes	1.33506	No
YDR244W	YDR244W	YDR244W	.	.	IV:950562-952401	WT	ksp1-KD	OK	41.9971	56.0604	0.416691	1.97033	0.0007	0.00317245	yes	1.33486	No
YOR261C	YOR261C	YOR261C	.	.	XV:815914-816931	WT	ksp1-KD	OK	880.532	1174.88	0.416065	1.69632	0.01225	0.0354465	yes	1.33428	No
YGR202C	YGR202C	YGR202C	.	.	VII:903473-904748	WT	ksp1-KD	OK	91.2237	121.716	0.416042	3.97091	0.0026	0.00967778	yes	1.33426	No
YKL155C	YKL155C	YKL155C	.	.	XI:159455-161342	WT	ksp1-KD	OK	29.6948	39.619	0.415981	2.70264	0.00045	0.00216794	yes	1.33421	No
YMR064W	YMR064W	YMR064W	.	.	XIII:397902-399459	WT	ksp1-KD	OK	58.4639	77.985	0.41565	1.97195	0.0002	0.00103818	yes	1.3339	No
YJR034W	YJR034W	YJR034W	.	.	X:496682-497009	WT	ksp1-KD	OK	105.154	140.252	0.41552	1.7264	0.01165	0.033937	yes	1.33378	No
snR84	snR84	snR84	.	.	IV:1492476-1493026	WT	ksp1-KD	OK	29.7698	39.6989	0.415251	1.65978	0.0119	0.0346032	yes	1.33353	No
YML107C	YML107C	YML107C	.	.	XIII:55264-56269	WT	ksp1-KD	OK	35.8884	47.8493	0.414979	1.99465	0.0008	0.00354894	yes	1.33328	No
YLR051C	YLR051C	YLR051C	.	.	XII:246323-246977	WT	ksp1-KD	OK	438.084	583.848	0.414388	4.43652	0.00075	0.00336852	yes	1.33273	No
YIL040W	YIL040W	YIL040W	.	.	IX:277722-278139	WT	ksp1-KD	OK	73.3986	97.8081	0.414202	2.05134	0.0011	0.0046603	yes	1.33256	No
YBR168W	YBR168W	YBR168W	.	.	II:572370-573612	WT	ksp1-KD	OK	15.7974	21.0422	0.413604	1.68998	0.0041	0.014196	yes	1.33201	No
YBR217W	YBR217W	YBR217W	.	.	II:657831-658392	WT	ksp1-KD	OK	72.8703	97.0356	0.413183	2.55725	0.00335	0.0119624	yes	1.33162	No
YBL048W	YBL048W	YBL048W	.	.	II:127298-127610	WT	ksp1-KD	OK	426.241	567.404	0.412707	2.30082	0.0009	0.00392031	yes	1.33118	No
YOR064C	YOR064C	YOR064C	.	.	XV:446078-446738	WT	ksp1-KD	OK	41.8737	55.726	0.412305	2.30596	0.0017	0.00674088	yes	1.33081	No
YML070W	YML070W	YML070W	.	.	XIII:133474-135229	WT	ksp1-KD	OK	105.014	139.751	0.412285	1.63326	0.00475	0.0161118	yes	1.33079	No
YBR146W	YBR146W	YBR146W	.	.	II:535259-536096	WT	ksp1-KD	OK	66.2986	88.1827	0.411516	2.02156	0.0009	0.00392031	yes	1.33008	No
YDR109C	YDR109C	YDR109C	.	.	IV:673519-675667	WT	ksp1-KD	OK	17.932	23.8449	0.411147	1.97988	0.0009	0.00392031	yes	1.32974	No
YDR056C	YDR056C	YDR056C	.	.	IV:565022-565640	WT	ksp1-KD	OK	232.539	309.085	0.410534	2.32785	0.0003	0.00149174	yes	1.32918	No
YGR165W	YGR165W	YGR165W	.	.	VII:829115-830153	WT	ksp1-KD	OK	47.8379	63.5824	0.410473	2.01508	0.00055	0.00257711	yes	1.32912	No
YOR365C	YOR365C	YOR365C	.	.	XV:1023370-1025609	WT	ksp1-KD	OK	6.38492	8.4857	0.410364	1.5258	0.0072	0.0228816	yes	1.32902	No
YOR185C	YOR185C	YOR185C	.	.	XV:681443-682106	WT	ksp1-KD	OK	158.053	209.921	0.409438	2.30553	0.0014	0.00574044	yes	1.32817	No
YBL042C	YBL042C	YBL042C	.	.	II:138340-140260	WT	ksp1-KD	OK	30.3331	40.2831	0.409281	1.90075	0.00175	0.00690543	yes	1.32802	No
YMR085W	YMR085W	YMR085W	.	.	XIII:437490-438789	WT	ksp1-KD	OK	6.91278	9.17961	0.409167	2.6379	0.00835	0.0257066	yes	1.32792	No
YPL070W	YPL070W	YPL070W	.	.	XVI:420947-422786	WT	ksp1-KD	OK	26.9329	35.7612	0.409028	2.27321	0.0007	0.00317245	yes	1.32779	No
YCR046C	YCR046C	YCR046C	.	.	III:209913-210423	WT	ksp1-KD	OK	145.398	193.032	0.408833	2.39764	0.00065	0.00297909	yes	1.32761	No
YKL167C	YKL167C	YKL167C	.	.	XI:133720-134134	WT	ksp1-KD	OK	80.974	107.459	0.408257	1.79679	0.0018	0.00708123	yes	1.32708	No
YOR356W	YOR356W	YOR356W	.	.	XV:1007220-1009116	WT	ksp1-KD	OK	64.7388	85.902	0.408061	2.10682	0.0015	0.00608141	yes	1.3269	No
YHR134W	YHR134W	YHR134W	.	.	VIII:371748-372558	WT	ksp1-KD	OK	36.2814	48.1248	0.407551	2.05599	0.00155	0.00624516	yes	1.32643	No
YGL060W	YGL060W	YGL060W	.	.	VII:390064-391990	WT	ksp1-KD	OK	15.5351	20.5984	0.407	2.30135	0.0006	0.0027833	yes	1.32593	No
YOR131C	YOR131C	YOR131C	.	.	XV:572181-572838	WT	ksp1-KD	OK	105.933	140.435	0.406751	2.00552	0.00055	0.00257711	yes	1.3257	No
YGR196C	YGR196C	YGR196C	.	.	VII:889732-892186	WT	ksp1-KD	OK	37.6721	49.9134	0.405931	2.54707	0.00055	0.00257711	yes	1.32494	No
YBR208C	YBR208C	YBR208C	.	.	II:636702-642210	WT	ksp1-KD	OK	69.3962	91.913	0.405413	1.44802	0.0166	0.0456939	yes	1.32447	No
YOR215C	YOR215C	YOR215C	.	.	XV:746724-747282	WT	ksp1-KD	OK	294.35	389.759	0.405052	2.11549	0.00085	0.00373758	yes	1.32414	No
YLR431C	YLR431C	YLR431C	.	.	XII:1000341-1001703	WT	ksp1-KD	OK	37.5563	49.7239	0.404885	2.22331	0.001	0.00430113	yes	1.32398	No
YMR278W	YMR278W	YMR278W	.	.	XIII:822762-824631	WT	ksp1-KD	OK	32.3164	42.7798	0.404665	1.98383	0.0008	0.00354894	yes	1.32378	No
YPL140C	YPL140C	YPL140C	.	.	XVI:287513-289034	WT	ksp1-KD	OK	23.1146	30.5916	0.40433	2.77026	0.0007	0.00317245	yes	1.32347	No
YKL053C-A	YKL053C-A	YKL053C-A	.	.	XI:339181-339442	WT	ksp1-KD	OK	909.424	1203.42	0.404114	2.42851	0.00155	0.00624516	yes	1.32328	No
YHR166C	YHR166C	YHR166C	.	.	VIII:437169-439050	WT	ksp1-KD	OK	14.6661	19.4016	0.40369	1.83221	0.0015	0.00608141	yes	1.32289	No
YKL119C	YKL119C	YKL119C	.	.	XI:218569-219437	WT	ksp1-KD	OK	50.7844	67.1741	0.403519	2.01086	0.0014	0.00574044	yes	1.32273	No
YIL112W	YIL112W	YIL112W	.	.	IX:151594-154846	WT	ksp1-KD	OK	34.3195	45.3951	0.403508	1.82472	0.0022	0.00839566	yes	1.32272	No
YMR225C	YMR225C	YMR225C	.	.	XIII:720959-721403	WT	ksp1-KD	OK	380.032	502.613	0.403327	2.0334	0.00165	0.00659493	yes	1.32255	No
YOR080W	YOR080W	YOR080W	.	.	XV:474593-476792	WT	ksp1-KD	OK	29.6647	39.2293	0.403182	2.12926	0.0011	0.0046603	yes	1.32242	No
YGL240W	YGL240W	YGL240W	.	.	VII:48612-49365	WT	ksp1-KD	OK	18.4715	24.414	0.402405	1.54652	0.0133	0.0380611	yes	1.32171	No
YJR099W	YJR099W	YJR099W	.	.	X:615575-616286	WT	ksp1-KD	OK	115.617	152.768	0.401993	2.10433	0.00105	0.0044806	yes	1.32133	No
YDR506C	YDR506C	YDR506C	.	.	IV:1459727-1461554	WT	ksp1-KD	OK	17.302	22.8608	0.40194	1.87922	0.0026	0.00967778	yes	1.32128	No
YJL104W	YJL104W	YJL104W	.	.	X:227326-227776	WT	ksp1-KD	OK	256.492	338.861	0.401776	2.86167	0.0026	0.00967778	yes	1.32113	No
YLR115W	YLR115W	YLR115W	.	.	XII:377984-380564	WT	ksp1-KD	OK	23.3728	30.8702	0.401386	1.973	0.0008	0.00354894	yes	1.32078	No
YKR064W	YKR064W	YKR064W	.	.	XI:562546-565138	WT	ksp1-KD	OK	36.8308	48.6237	0.400747	2.31537	0.0012	0.00503148	yes	1.32019	No
YLR227C	YLR227C	YLR227C	.	.	XII:590561-592043	WT	ksp1-KD	OK	32.7931	43.2843	0.400454	2.05912	0.0005	0.00238233	yes	1.31992	No
YLR010C	YLR010C	YLR010C	.	.	XII:167319-167802	WT	ksp1-KD	OK	106.122	140.019	0.39989	3.58705	0.00925	0.0278959	yes	1.31941	No
YMR234W	YMR234W	YMR234W	.	.	XIII:740265-741312	WT	ksp1-KD	OK	38.0542	50.1951	0.399492	2.21341	0.00205	0.00790211	yes	1.31904	No
YMR317W	YMR317W	YMR317W	.	.	XIII:907320-910786	WT	ksp1-KD	OK	7.4727	9.856	0.399372	2.7784	0.0007	0.00317245	yes	1.31893	No
YOR060C	YOR060C	YOR060C	.	.	XV:440389-441163	WT	ksp1-KD	OK	31.2975	41.2764	0.399273	1.65801	0.00565	0.0186109	yes	1.31884	No
YMR152W	YMR152W	YMR152W	.	.	XIII:563095-564193	WT	ksp1-KD	OK	80.8804	106.621	0.398626	2.07466	0.0017	0.00674088	yes	1.31825	No
YGR024C	YGR024C	YGR024C	.	.	VII:531882-532596	WT	ksp1-KD	OK	183.895	242.396	0.398485	2.01198	0.001	0.00430113	yes	1.31812	No
YGR055W	YGR055W	YGR055W	.	.	VII:599416-601141	WT	ksp1-KD	OK	58.8704	77.584	0.398218	1.832	0.0032	0.0114899	yes	1.31788	No
YLL006W	YLL006W	YLL006W	.	.	XII:136585-137866	WT	ksp1-KD	OK	24.6277	32.4559	0.398203	2.00924	0.00205	0.00790211	yes	1.31787	No
YMR093W	YMR093W	YMR093W	.	.	XIII:454014-455556	WT	ksp1-KD	OK	48.3245	63.6796	0.398075	1.85745	0.00145	0.0059156	yes	1.31775	No
YNL316C	YNL316C	YNL316C	.	.	XIV:42070-43075	WT	ksp1-KD	OK	36.9289	48.6464	0.397582	2.87709	0.00125	0.00521757	yes	1.3173	No
YOR264W	YOR264W	YOR264W	.	.	XV:818756-820158	WT	ksp1-KD	OK	45.3623	59.7544	0.397552	2.49546	0.00095	0.00409691	yes	1.31727	No
YCR059C	YCR059C	YCR059C	.	.	III:223453-224230	WT	ksp1-KD	OK	88.8126	116.984	0.397479	1.94731	0.0009	0.00392031	yes	1.3172	No
YBR204C	YBR204C	YBR204C	.	.	II:632253-633381	WT	ksp1-KD	OK	78.7106	103.642	0.396979	2.44636	0.00105	0.0044806	yes	1.31675	No
YLR352W	YLR352W	YLR352W	.	.	XII:831115-833539	WT	ksp1-KD	OK	10.4717	13.782	0.396288	2.03736	0.0013	0.0053882	yes	1.31612	No
YJL203W	YJL203W	YJL203W	.	.	X:53340-54290	WT	ksp1-KD	OK	28.4969	37.5026	0.396188	1.55771	0.0125	0.0360735	yes	1.31603	No
YPL013C	YPL013C	YPL013C	.	.	XVI:528984-529350	WT	ksp1-KD	OK	1447.2	1903.87	0.395672	4.97987	0.00095	0.00409691	yes	1.31556	No
YIR030C	YIR030C	YIR030C	.	.	IX:412035-412770	WT	ksp1-KD	OK	392.31	516.068	0.395567	2.27417	0.0034	0.0121077	yes	1.31546	No
YPL170W	YPL170W	YPL170W	.	.	XVI:228313-228772	WT	ksp1-KD	OK	219.452	288.614	0.395232	1.99207	0.00085	0.00373758	yes	1.31515	No
YBR111C	YBR111C	YBR111C	.	.	II:461177-461873	WT	ksp1-KD	OK	238.003	312.975	0.395065	1.88015	0.00165	0.00659493	yes	1.315	No
YDL175C	YDL175C	YDL175C	.	.	IV:144483-145518	WT	ksp1-KD	OK	35.0261	46.0481	0.394713	1.96321	0.0009	0.00392031	yes	1.31468	No
YDR124W	YDR124W	YDR124W	.	.	IV:700314-701289	WT	ksp1-KD	OK	10.0186	13.1673	0.394287	1.53897	0.0148	0.0415487	yes	1.31429	No
YOR129C	YOR129C	YOR129C	.	.	XV:566876-569558	WT	ksp1-KD	OK	9.29545	12.2156	0.394127	1.93987	0.0016	0.0064267	yes	1.31415	No
YMR124W	YMR124W	YMR124W	.	.	XIII:514455-517287	WT	ksp1-KD	OK	10.5983	13.9252	0.393859	2.64564	0.00145	0.0059156	yes	1.3139	No
YOR386W	YOR386W	YOR386W	.	.	XV:1066838-1068536	WT	ksp1-KD	OK	14.1707	18.615	0.393558	1.84991	0.0024	0.00903685	yes	1.31363	No
YPL160W	YPL160W	YPL160W	.	.	XVI:246989-250262	WT	ksp1-KD	OK	95.8415	125.896	0.393504	1.49835	0.01485	0.0416531	yes	1.31358	No
YGR287C	YGR287C	YGR287C	.	.	VII:1067221-1068991	WT	ksp1-KD	OK	6.1838	8.12285	0.393493	1.50252	0.01305	0.0374777	yes	1.31357	No
YDL183C	YDL183C	YDL183C	.	.	IV:130870-131833	WT	ksp1-KD	OK	20.9749	27.5465	0.393206	1.68453	0.0055	0.0182091	yes	1.31331	No
YPR094W	YPR094W	YPR094W	.	.	XVI:720636-720960	WT	ksp1-KD	OK	214.422	281.568	0.393028	3.00202	0.00575	0.0188924	yes	1.31315	No
YMR136W	YMR136W	YMR136W	.	.	XIII:541198-542881	WT	ksp1-KD	OK	101.123	132.789	0.393027	1.77442	0.01195	0.034671	yes	1.31315	No
YDR294C	YDR294C	YDR294C	.	.	IV:1050458-1052228	WT	ksp1-KD	OK	117.888	154.78	0.392801	1.55468	0.0101	0.0301239	yes	1.31294	No
YOR298C-A	YOR298C-A	YOR298C-A	.	.	XV:877229-877685	WT	ksp1-KD	OK	1316	1727.41	0.392451	1.61892	0.0104	0.0309052	yes	1.31262	No
YDR011W	YDR011W	YDR011W	.	.	IV:465918-470424	WT	ksp1-KD	OK	33.0492	43.3679	0.392014	1.63219	0.0051	0.0170586	yes	1.31222	No
YOR004W	YOR004W	YOR004W	.	.	XV:333591-334356	WT	ksp1-KD	OK	156.196	204.909	0.391623	2.25333	0.0011	0.0046603	yes	1.31187	No
YBR057C	YBR057C	YBR057C	.	.	II:352192-353293	WT	ksp1-KD	OK	76.2853	100.029	0.390942	1.89321	0.0024	0.00903685	yes	1.31125	No
YOL067C	YOL067C	YOL067C	.	.	XV:201984-202518	WT	ksp1-KD	OK	91.3153	119.732	0.390875	1.93293	0.0009	0.00392031	yes	1.31119	No
YPR047W	YPR047W	YPR047W	.	.	XVI:657528-658938	WT	ksp1-KD	OK	15.6393	20.4998	0.390439	1.74064	0.00315	0.0113355	yes	1.31079	No
YLL056C	YLL056C	YLL056C	.	.	XII:27408-28305	WT	ksp1-KD	OK	17.5482	22.9997	0.390286	1.64877	0.0079	0.0245774	yes	1.31065	No
YDL053C	YDL053C	YDL053C	.	.	IV:361698-362256	WT	ksp1-KD	OK	89.2128	116.926	0.390273	2.1468	0.0008	0.00354894	yes	1.31064	No
YFL016C	YFL016C	YFL016C	.	.	VI:104700-106236	WT	ksp1-KD	OK	78.7607	103.203	0.389941	1.6375	0.00655	0.0211048	yes	1.31034	No
YGR147C	YGR147C	YGR147C	.	.	VII:786053-786920	WT	ksp1-KD	OK	146.84	192.38	0.389709	2.72775	0.00105	0.0044806	yes	1.31013	No
YOR278W	YOR278W	YOR278W	.	.	XV:842816-843644	WT	ksp1-KD	OK	63.441	83.0949	0.389344	1.96894	0.0029	0.0105586	yes	1.3098	No
YJR036C	YJR036C	YJR036C	.	.	X:500712-503485	WT	ksp1-KD	OK	8.23961	10.792	0.389308	1.75301	0.00735	0.0232333	yes	1.30977	No
YDR499W	YDR499W	YDR499W	.	.	IV:1447829-1450073	WT	ksp1-KD	OK	22.3004	29.2051	0.389149	1.85496	0.0013	0.0053882	yes	1.30962	No
YGR023W	YGR023W	YGR023W	.	.	VII:529256-530919	WT	ksp1-KD	OK	15.2376	19.9531	0.388973	2.92474	0.0012	0.00503148	yes	1.30946	No
YDR121W	YDR121W	YDR121W	.	.	IV:693584-694175	WT	ksp1-KD	OK	108.065	141.465	0.388544	1.96634	0.00215	0.00823871	yes	1.30907	No
YOL108C	YOL108C	YOL108C	.	.	XV:111430-111886	WT	ksp1-KD	OK	765.449	1001.22	0.387382	6.60714	0.0018	0.00708123	yes	1.30802	No
YHR097C	YHR097C	YHR097C	.	.	VIII:297384-298609	WT	ksp1-KD	OK	61.5678	80.5106	0.387002	1.79389	0.00245	0.00919847	yes	1.30767	No
YJL047C	YJL047C	YJL047C	.	.	X:349579-352108	WT	ksp1-KD	OK	19.6789	25.7217	0.386334	1.88132	0.0013	0.0053882	yes	1.30707	No
YBR291C	YBR291C	YBR291C	.	.	II:783672-784572	WT	ksp1-KD	OK	69.5535	90.9096	0.38631	1.86771	0.00155	0.00624516	yes	1.30705	No
YMR180C	YMR180C	YMR180C	.	.	XIII:622250-623213	WT	ksp1-KD	OK	23.2122	30.338	0.386246	1.91341	0.0028	0.0102462	yes	1.30699	No
YAL010C	YAL010C	YAL010C	.	.	I:134183-135665	WT	ksp1-KD	OK	19.7897	25.8613	0.386047	1.89191	0.00215	0.00823871	yes	1.30681	No
YNL281W	YNL281W	YNL281W	.	.	XIV:108466-108928	WT	ksp1-KD	OK	277.168	362.004	0.385247	1.8573	0.0023	0.00871078	yes	1.30608	No
YDL217C	YDL217C	YDL217C	.	.	IV:67982-68606	WT	ksp1-KD	OK	48.427	63.2396	0.385017	2.78174	0.00225	0.00854632	yes	1.30588	No
YMR041C	YMR041C	YMR041C	.	.	XIII:350965-351973	WT	ksp1-KD	OK	145.893	190.386	0.384014	1.78067	0.0027	0.00994181	yes	1.30497	No
YER050C	YER050C	YER050C	.	.	V:253970-254387	WT	ksp1-KD	OK	114.595	149.521	0.383803	2.19887	0.00115	0.00485315	yes	1.30478	No
YDR494W	YDR494W	YDR494W	.	.	IV:1436929-1438015	WT	ksp1-KD	OK	67.2832	87.787	0.383761	1.88851	0.0012	0.00503148	yes	1.30474	No
YPL055C	YPL055C	YPL055C	.	.	XVI:453991-454990	WT	ksp1-KD	OK	41.5771	54.2159	0.382926	1.93753	0.00145	0.0059156	yes	1.30398	No
YGL054C	YGL054C	YGL054C	.	.	VII:400870-401287	WT	ksp1-KD	OK	428.011	558.099	0.382875	1.81312	0.00215	0.00823871	yes	1.30394	No
YKL162C	YKL162C	YKL162C	.	.	XI:147629-148838	WT	ksp1-KD	OK	14.8054	19.2977	0.382308	1.467	0.0126	0.0363298	yes	1.30343	No
YPL053C	YPL053C	YPL053C	.	.	XVI:457117-458458	WT	ksp1-KD	OK	121.889	158.869	0.382279	1.7145	0.00355	0.012573	yes	1.3034	No
YOR147W	YOR147W	YOR147W	.	.	XV:606606-608475	WT	ksp1-KD	OK	28.8776	37.6342	0.382094	1.93309	0.0013	0.0053882	yes	1.30323	No
YNR065C	YNR065C	YNR065C	.	.	XIV:750349-753700	WT	ksp1-KD	OK	9.77949	12.741	0.381645	1.84239	0.00275	0.0100859	yes	1.30283	No
YMR097C	YMR097C	YMR097C	.	.	XIII:459423-460527	WT	ksp1-KD	OK	48.1181	62.6857	0.381557	1.8289	0.0013	0.0053882	yes	1.30275	No
YMR233W	YMR233W	YMR233W	.	.	XIII:739184-739865	WT	ksp1-KD	OK	57.5884	75.0177	0.381453	2.1103	0.0047	0.0159589	yes	1.30265	No
YOR154W	YOR154W	YOR154W	.	.	XV:624728-626492	WT	ksp1-KD	OK	46.7676	60.915	0.381287	1.87582	0.00205	0.00790211	yes	1.3025	No
YPL183W-A	YPL183W-A	YPL183W-A	.	.	XVI:199094-199376	WT	ksp1-KD	OK	195.234	254.286	0.381248	1.54339	0.00805	0.0249723	yes	1.30247	No
YGR168C	YGR168C	YGR168C	.	.	VII:833351-834482	WT	ksp1-KD	OK	32.7597	42.6384	0.380233	1.76018	0.00265	0.00978543	yes	1.30155	No
YDR179W-A	YDR179W-A	YDR179W-A	.	.	IV:819432-820824	WT	ksp1-KD	OK	33.0196	42.9751	0.380181	1.92722	0.00155	0.00624516	yes	1.30151	No
YML023C	YML023C	YML023C	.	.	XIII:226993-228664	WT	ksp1-KD	OK	35.7976	46.5753	0.379699	2.03435	0.0011	0.0046603	yes	1.30107	No
YMR264W	YMR264W	YMR264W	.	.	XIII:795804-796416	WT	ksp1-KD	OK	205.003	266.704	0.379594	1.81996	0.0026	0.00967778	yes	1.30098	No
YIR016W	YIR016W	YIR016W	.	.	IX:382627-383425	WT	ksp1-KD	OK	33.9938	44.2241	0.379561	1.77828	0.00265	0.00978543	yes	1.30095	No
YGR193C	YGR193C	YGR193C	.	.	VII:884508-885741	WT	ksp1-KD	OK	104.333	135.713	0.379372	1.91301	0.00315	0.0113355	yes	1.30078	No
YOL008W	YOL008W	YOL008W	.	.	XV:310311-310935	WT	ksp1-KD	OK	65.121	84.6679	0.378692	1.75247	0.00295	0.0107226	yes	1.30016	No
YNL326C	YNL326C	YNL326C	.	.	XIV:27336-28347	WT	ksp1-KD	OK	41.5657	54.0334	0.378458	1.76633	0.00215	0.00823871	yes	1.29995	No
YGR091W	YGR091W	YGR091W	.	.	VII:666340-667825	WT	ksp1-KD	OK	43.3489	56.3444	0.378276	2.23897	0.0015	0.00608141	yes	1.29979	No
YOR265W	YOR265W	YOR265W	.	.	XV:820453-820774	WT	ksp1-KD	OK	887.462	1153.44	0.378184	2.79154	0.00295	0.0107226	yes	1.2997	No
YKR045C	YKR045C	YKR045C	.	.	XI:523417-523969	WT	ksp1-KD	OK	31.493	40.9272	0.378029	1.82372	0.0144	0.0406364	yes	1.29957	No
YKR063C	YKR063C	YKR063C	.	.	XI:560788-562297	WT	ksp1-KD	OK	28.8901	37.5301	0.377477	4.77808	0.0017	0.00674088	yes	1.29907	No
YOL111C	YOL111C	YOL111C	.	.	XV:108257-108896	WT	ksp1-KD	OK	85.3748	110.906	0.377461	1.85509	0.00135	0.00555998	yes	1.29905	No
YKR038C	YKR038C	YKR038C	.	.	XI:511998-513159	WT	ksp1-KD	OK	63.0247	81.8614	0.377266	2.03718	0.00255	0.00953536	yes	1.29888	No
YDR282C	YDR282C	YDR282C	.	.	IV:1023510-1024755	WT	ksp1-KD	OK	59.1994	76.8747	0.376925	2.85047	0.0041	0.014196	yes	1.29857	No
YNR002C	YNR002C	YNR002C	.	.	XIV:633007-633856	WT	ksp1-KD	OK	18.4599	23.9607	0.376275	1.80555	0.0051	0.0170586	yes	1.29799	No
YDL248W	YDL248W	YDL248W	.	.	IV:1801-2953	WT	ksp1-KD	OK	20.6815	26.8207	0.375007	1.68082	0.0064	0.0207243	yes	1.29685	No
YNL040W	YNL040W	YNL040W	.	.	XIV:553379-554750	WT	ksp1-KD	OK	188.521	244.458	0.374859	1.59605	0.0095	0.028465	yes	1.29671	No
YDR513W	YDR513W	YDR513W	.	.	IV:1470499-1471448	WT	ksp1-KD	OK	475.126	616.038	0.374708	2.03423	0.0164	0.04522	yes	1.29658	No
YDR469W	YDR469W	YDR469W	.	.	IV:1399014-1399542	WT	ksp1-KD	OK	413.95	536.521	0.374178	3.20303	0.00145	0.0059156	yes	1.2961	No
YJL157C	YJL157C	YJL157C	.	.	X:123835-126328	WT	ksp1-KD	OK	9.99095	12.949	0.374144	1.69164	0.0067	0.0214816	yes	1.29607	No
YLL049W	YLL049W	YLL049W	.	.	XII:40665-41205	WT	ksp1-KD	OK	78.2245	101.354	0.373711	2.10522	0.00855	0.0262353	yes	1.29568	No
YCR054C	YCR054C	YCR054C	.	.	III:218375-220067	WT	ksp1-KD	OK	22.9945	29.7932	0.373696	2.64317	0.0018	0.00708123	yes	1.29567	No
YBL039C	YBL039C	YBL039C	.	.	II:143988-145728	WT	ksp1-KD	OK	76.6166	99.2599	0.373554	1.55285	0.0073	0.023109	yes	1.29554	No
YDR369C	YDR369C	YDR369C	.	.	IV:1215015-1217580	WT	ksp1-KD	OK	11.9984	15.5388	0.373033	1.75707	0.00385	0.0134885	yes	1.29507	No
YER142C	YER142C	YER142C	.	.	V:455145-456036	WT	ksp1-KD	OK	120.46	155.949	0.372523	1.77997	0.0017	0.00674088	yes	1.29461	No
YLR105C	YLR105C	YLR105C	.	.	XII:347046-348180	WT	ksp1-KD	OK	63.2833	81.9067	0.372157	1.79241	0.0022	0.00839566	yes	1.29429	No
YNL252C	YNL252C	YNL252C	.	.	XIV:171440-172286	WT	ksp1-KD	OK	61.5256	79.628	0.372088	1.84994	0.00225	0.00854632	yes	1.29422	No
YGR077C	YGR077C	YGR077C	.	.	VII:637743-639513	WT	ksp1-KD	OK	26.3486	34.0997	0.372035	2.13282	0.00215	0.00823871	yes	1.29418	No
YNL314W	YNL314W	YNL314W	.	.	XIV:44446-45214	WT	ksp1-KD	OK	56.3365	72.9008	0.371864	1.78157	0.00205	0.00790211	yes	1.29402	No
YKR006C	YKR006C	YKR006C	.	.	XI:450422-451217	WT	ksp1-KD	OK	63.4342	82.0662	0.371526	1.7579	0.0025	0.00936455	yes	1.29372	No
YLR275W	YLR275W	YLR275W	.	.	XII:694377-694800	WT	ksp1-KD	OK	253.514	327.887	0.371133	1.86764	0.0092	0.0277838	yes	1.29337	No
YGR284C	YGR284C	YGR284C	.	.	VII:1060657-1061590	WT	ksp1-KD	OK	152.461	197.161	0.370937	1.60613	0.00775	0.0242267	yes	1.29319	No
YDR285W	YDR285W	YDR285W	.	.	IV:1032435-1035063	WT	ksp1-KD	OK	4.40786	5.70009	0.370906	1.69726	0.01085	0.0320665	yes	1.29316	No
YBR279W	YBR279W	YBR279W	.	.	II:761256-762594	WT	ksp1-KD	OK	35.0314	45.3005	0.37088	2.8961	0.0019	0.0074252	yes	1.29314	No
YGR258C	YGR258C	YGR258C	.	.	VII:1007670-1010766	WT	ksp1-KD	OK	25.5333	33.017	0.370831	2.04341	0.00205	0.00790211	yes	1.2931	No
YOR164C	YOR164C	YOR164C	.	.	XV:643393-644332	WT	ksp1-KD	OK	123.912	160.202	0.370573	2.13505	0.00155	0.00624516	yes	1.29287	No
YOR104W	YOR104W	YOR104W	.	.	XV:517641-518521	WT	ksp1-KD	OK	54.8736	70.9347	0.370379	1.94869	0.0061	0.0199316	yes	1.29269	No
YER167W	YER167W	YER167W	.	.	V:518215-520771	WT	ksp1-KD	OK	22.6528	29.2817	0.370308	1.88843	0.00265	0.00978543	yes	1.29263	No
YMR187C	YMR187C	YMR187C	.	.	XIII:634688-635984	WT	ksp1-KD	OK	33.9231	43.8458	0.37017	1.76457	0.0025	0.00936455	yes	1.29251	No
YDR381C-A	YDR381C-A	YDR381C-A	.	.	IV:1238311-1238850	WT	ksp1-KD	OK	238.394	307.898	0.369104	1.90303	0.01435	0.0405481	yes	1.29155	No
YLL058W	YLL058W	YLL058W	.	.	XII:23568-25296	WT	ksp1-KD	OK	14.8153	19.1257	0.368421	1.68784	0.0036	0.0127154	yes	1.29094	No
YCR068W	YCR068W	YCR068W	.	.	III:237213-238776	WT	ksp1-KD	OK	73.053	94.2844	0.368074	1.71726	0.00425	0.0146763	yes	1.29063	No
YKR086W	YKR086W	YKR086W	.	.	XI:599856-603072	WT	ksp1-KD	OK	15.7787	20.3594	0.367718	1.82148	0.00255	0.00953536	yes	1.29031	No
YCR097W	YCR097W	YCR097W	.	.	III:293834-294321	WT	ksp1-KD	OK	232.434	299.813	0.367241	1.79167	0.0053	0.0176549	yes	1.28988	No
YDR202C	YDR202C	YDR202C	.	.	IV:856897-857999	WT	ksp1-KD	OK	62.4986	80.5879	0.36674	1.60987	0.00565	0.0186109	yes	1.28944	No
YBR175W	YBR175W	YBR175W	.	.	II:582337-583355	WT	ksp1-KD	OK	23.7401	30.6094	0.36665	1.53995	0.00935	0.0281322	yes	1.28936	No
YIL077C	YIL077C	YIL077C	.	.	IX:214990-215953	WT	ksp1-KD	OK	86.8897	112.03	0.366629	2.33409	0.00225	0.00854632	yes	1.28934	No
YML029W	YML029W	YML029W	.	.	XIII:217361-219878	WT	ksp1-KD	OK	29.4913	38.0221	0.366551	1.85286	0.00265	0.00978543	yes	1.28927	No
YPR082C	YPR082C	YPR082C	.	.	XVI:704224-704656	WT	ksp1-KD	OK	228.317	294.101	0.365276	2.27063	0.00245	0.00919847	yes	1.28813	No
YHR138C	YHR138C	YHR138C	.	.	VIII:377354-377699	WT	ksp1-KD	OK	1995.48	2570.24	0.365169	2.32277	0.0121	0.0350593	yes	1.28803	No
YKL098W	YKL098W	YKL098W	.	.	XI:256769-257843	WT	ksp1-KD	OK	25.6077	32.9815	0.365076	3.60959	0.003	0.010874	yes	1.28795	No
YGL112C	YGL112C	YGL112C	.	.	VII:298177-299728	WT	ksp1-KD	OK	79.1653	101.932	0.364673	1.61595	0.00465	0.0158139	yes	1.28759	No
YHR075C	YHR075C	YHR075C	.	.	VIII:248438-249641	WT	ksp1-KD	OK	27.41	35.2726	0.363846	1.77478	0.00275	0.0100859	yes	1.28685	No
YDL238C	YDL238C	YDL238C	.	.	IV:28984-30454	WT	ksp1-KD	OK	78.6906	101.257	0.363759	1.51889	0.0077	0.0241052	yes	1.28677	No
YDR049W	YDR049W	YDR049W	.	.	IV:553083-555152	WT	ksp1-KD	OK	33.2414	42.7721	0.363688	2.05025	0.00225	0.00854632	yes	1.28671	No
YMR299C	YMR299C	YMR299C	.	.	XIII:864411-865350	WT	ksp1-KD	OK	97.9142	125.986	0.363674	1.88133	0.0023	0.00871078	yes	1.2867	No
YHR059W	YHR059W	YHR059W	.	.	VIII:220107-220500	WT	ksp1-KD	OK	47.3572	60.9339	0.363661	1.64889	0.0155	0.0432151	yes	1.28669	No
YBL015W	YBL015W	YBL015W	.	.	II:194121-195702	WT	ksp1-KD	OK	40.7495	52.4215	0.363376	1.7224	0.00225	0.00854632	yes	1.28643	No
YDL110C	YDL110C	YDL110C	.	.	IV:264511-264964	WT	ksp1-KD	OK	1441.85	1854.8	0.363346	3.66053	0.00645	0.020855	yes	1.28641	No
YPR026W	YPR026W	YPR026W	.	.	XVI:615378-619014	WT	ksp1-KD	OK	12.2195	15.7155	0.362995	1.74994	0.0029	0.0105586	yes	1.28609	No
YDL013W	YDL013W	YDL013W	.	.	IV:429066-430926	WT	ksp1-KD	OK	34.2725	44.0762	0.362947	1.80205	0.0022	0.00839566	yes	1.28605	No
YOR349W	YOR349W	YOR349W	.	.	XV:989788-992833	WT	ksp1-KD	OK	6.55548	8.42986	0.362807	1.67703	0.00485	0.0164082	yes	1.28593	No
YHR168W	YHR168W	YHR168W	.	.	VIII:440376-441933	WT	ksp1-KD	OK	11.1454	14.3321	0.362801	1.6416	0.0138	0.0392157	yes	1.28592	No
YIL051C	YIL051C	YIL051C	.	.	IX:257842-258280	WT	ksp1-KD	OK	431.723	555.136	0.362736	2.01326	0.00925	0.0278959	yes	1.28586	No
YDR030C	YDR030C	YDR030C	.	.	IV:501752-503273	WT	ksp1-KD	OK	52.7074	67.7336	0.361866	2.29497	0.0034	0.0121077	yes	1.28509	No
YPR186C	YPR186C	YPR186C	.	.	XVI:909732-911022	WT	ksp1-KD	OK	27.3498	35.1437	0.361738	1.67717	0.005	0.016802	yes	1.28497	No
YPL006W	YPL006W	YPL006W	.	.	XVI:544630-548143	WT	ksp1-KD	OK	32.8578	42.205	0.361179	1.58955	0.00695	0.0222284	yes	1.28448	No
YCL033C	YCL033C	YCL033C	.	.	III:62775-63282	WT	ksp1-KD	OK	306.339	393.459	0.36108	1.93631	0.0028	0.0102462	yes	1.28439	No
YGL236C	YGL236C	YGL236C	.	.	VII:53786-55815	WT	ksp1-KD	OK	12.0572	15.4735	0.359911	1.52627	0.00895	0.0271931	yes	1.28335	No
YLR368W	YLR368W	YLR368W	.	.	XII:857539-859336	WT	ksp1-KD	OK	31.3864	40.2786	0.359874	1.77045	0.00265	0.00978543	yes	1.28331	No
YLR283W	YLR283W	YLR283W	.	.	XII:705070-706130	WT	ksp1-KD	OK	39.5584	50.7481	0.359369	1.77494	0.0029	0.0105586	yes	1.28286	No
YAL039C	YAL039C	YAL039C	.	.	I:68715-69525	WT	ksp1-KD	OK	70.7367	90.7117	0.358829	1.63821	0.00505	0.016935	yes	1.28238	No
YGR207C	YGR207C	YGR207C	.	.	VII:910842-911628	WT	ksp1-KD	OK	382.827	490.828	0.358524	3.38832	0.0056	0.0184743	yes	1.28211	No
YIL046W	YIL046W	YIL046W	.	.	IX:268650-270573	WT	ksp1-KD	OK	63.7301	81.6979	0.358324	1.56446	0.0071	0.0226524	yes	1.28194	No
YLR102C	YLR102C	YLR102C	.	.	XII:342969-343767	WT	ksp1-KD	OK	37.8225	48.4856	0.358311	1.558	0.00595	0.0195003	yes	1.28192	No
YDL149W	YDL149W	YDL149W	.	.	IV:184924-187918	WT	ksp1-KD	OK	20.8291	26.6926	0.357841	1.75219	0.0028	0.0102462	yes	1.28151	No
YLR144C	YLR144C	YLR144C	.	.	XII:429676-432016	WT	ksp1-KD	OK	17.2077	22.0512	0.357799	1.81574	0.0027	0.00994181	yes	1.28147	No
YPL176C	YPL176C	YPL176C	.	.	XVI:216011-218363	WT	ksp1-KD	OK	27.8509	35.6869	0.357668	1.72107	0.00265	0.00978543	yes	1.28135	No
YNL050C	YNL050C	YNL050C	.	.	XIV:534078-534982	WT	ksp1-KD	OK	168.591	215.926	0.357006	2.38039	0.00355	0.012573	yes	1.28077	No
YMR164C	YMR164C	YMR164C	.	.	XIII:587273-589550	WT	ksp1-KD	OK	7.78858	9.97384	0.356789	1.64083	0.0061	0.0199316	yes	1.28057	No
YHL039W	YHL039W	YHL039W	.	.	VIII:21782-23540	WT	ksp1-KD	OK	55.3976	70.9224	0.356418	1.66783	0.00505	0.016935	yes	1.28024	No
YAL030W	YAL030W	YAL030W	.	.	I:87285-87752	WT	ksp1-KD	OK	405.384	518.883	0.356121	1.7144	0.00265	0.00978543	yes	1.27998	No
YKL022C	YKL022C	YKL022C	.	.	XI:394725-397248	WT	ksp1-KD	OK	31.4524	40.2568	0.356064	1.7358	0.0033	0.0117969	yes	1.27993	No
YPR128C	YPR128C	YPR128C	.	.	XVI:791217-792204	WT	ksp1-KD	OK	55.9377	71.5893	0.355921	1.85263	0.00285	0.0104116	yes	1.2798	No
YLR241W	YLR241W	YLR241W	.	.	XII:620472-622821	WT	ksp1-KD	OK	31.2768	40.0186	0.355578	1.70542	0.00665	0.0213529	yes	1.2795	No
YKL024C	YKL024C	YKL024C	.	.	XI:392525-393140	WT	ksp1-KD	OK	148.247	189.601	0.354965	1.708	0.00345	0.0122522	yes	1.27895	No
YLR284C	YLR284C	YLR284C	.	.	XII:706197-707040	WT	ksp1-KD	OK	25.012	31.9794	0.35452	2.04451	0.0094	0.0282174	yes	1.27856	No
YOR044W	YOR044W	YOR044W	.	.	XV:413006-413480	WT	ksp1-KD	OK	446.369	570.679	0.354444	1.56942	0.0071	0.0226524	yes	1.27849	No
YNL005C	YNL005C	YNL005C	.	.	XIV:621312-622428	WT	ksp1-KD	OK	143.477	183.428	0.354401	1.95095	0.0051	0.0170586	yes	1.27845	No
YPL068C	YPL068C	YPL068C	.	.	XVI:424214-425096	WT	ksp1-KD	OK	22.1697	28.3397	0.354235	1.43712	0.0135	0.0385147	yes	1.27831	No
YIL162W	YIL162W	YIL162W	.	.	IX:37384-38983	WT	ksp1-KD	OK	25.2717	32.3042	0.354197	1.85722	0.0036	0.0127154	yes	1.27827	No
YDR197W	YDR197W	YDR197W	.	.	IV:851227-852397	WT	ksp1-KD	OK	26.6158	34.0131	0.353809	1.62034	0.00555	0.018356	yes	1.27793	No
YCR060W	YCR060W	YCR060W	.	.	III:224398-224734	WT	ksp1-KD	OK	118.151	150.897	0.352928	1.4406	0.0148	0.0415487	yes	1.27715	No
YGR198W	YGR198W	YGR198W	.	.	VII:894692-897146	WT	ksp1-KD	OK	30.9871	39.5692	0.35271	1.6902	0.0049	0.0165343	yes	1.27696	No
YEL038W	YEL038W	YEL038W	.	.	V:80461-81145	WT	ksp1-KD	OK	120.876	154.304	0.352251	1.7459	0.00395	0.0137942	yes	1.27655	No
YKR058W	YKR058W	YKR058W	.	.	XI:552769-554620	WT	ksp1-KD	OK	30.7811	39.2899	0.35211	1.95912	0.00335	0.0119624	yes	1.27643	No
YDR439W	YDR439W	YDR439W	.	.	IV:1339675-1340719	WT	ksp1-KD	OK	27.5762	35.19	0.35174	1.81102	0.0056	0.0184743	yes	1.2761	No
YGR213C	YGR213C	YGR213C	.	.	VII:918511-919465	WT	ksp1-KD	OK	51.8022	66.0569	0.350695	1.81515	0.00305	0.0110306	yes	1.27517	No
YHL020C	YHL020C	YHL020C	.	.	VIII:66241-67456	WT	ksp1-KD	OK	55.1092	70.273	0.350677	1.85283	0.00465	0.0158139	yes	1.27516	No
YIL011W	YIL011W	YIL011W	.	.	IX:333726-334536	WT	ksp1-KD	OK	12.7303	16.2301	0.350407	1.45266	0.0165	0.0454379	yes	1.27492	No
YKL187C	YKL187C	YKL187C	.	.	XI:89283-91536	WT	ksp1-KD	OK	5.64577	7.19588	0.350001	1.78051	0.0112	0.0328618	yes	1.27456	No
YOR221C	YOR221C	YOR221C	.	.	XV:756475-757558	WT	ksp1-KD	OK	33.9145	43.2143	0.349607	1.97861	0.00365	0.0128641	yes	1.27421	No
YGR141W	YGR141W	YGR141W	.	.	VII:770568-771972	WT	ksp1-KD	OK	48.9918	62.4229	0.349534	1.84177	0.004	0.0139464	yes	1.27415	No
YJL063C	YJL063C	YJL063C	.	.	X:315758-316475	WT	ksp1-KD	OK	90.0477	114.73	0.349485	2.1046	0.00405	0.0140904	yes	1.27411	No
YBR186W	YBR186W	YBR186W	.	.	II:600552-602360	WT	ksp1-KD	OK	17.6099	22.4334	0.349262	1.75925	0.0157	0.0435672	yes	1.27391	No
YBR268W	YBR268W	YBR268W	.	.	II:741298-741616	WT	ksp1-KD	OK	541.925	690.322	0.349177	5.26531	0.01625	0.044959	yes	1.27383	No
YKR022C	YKR022C	YKR022C	.	.	XI:482170-483139	WT	ksp1-KD	OK	71.0341	90.4691	0.348913	2.57028	0.00565	0.0186109	yes	1.2736	No
YDL077C	YDL077C	YDL077C	.	.	IV:316970-320120	WT	ksp1-KD	OK	12.8938	16.4211	0.34887	1.71888	0.00405	0.0140904	yes	1.27356	No
YGR033C	YGR033C	YGR033C	.	.	VII:554247-554967	WT	ksp1-KD	OK	93.6582	119.26	0.348632	1.67348	0.00365	0.0128641	yes	1.27335	No
YDR463W	YDR463W	YDR463W	.	.	IV:1386815-1388375	WT	ksp1-KD	OK	86.3885	110.002	0.348613	1.49649	0.01095	0.0322447	yes	1.27334	No
YPL159C	YPL159C	YPL159C	.	.	XVI:250906-251668	WT	ksp1-KD	OK	254.607	324.085	0.348101	1.41928	0.0151	0.0422449	yes	1.27288	No
YDR140W	YDR140W	YDR140W	.	.	IV:734137-734803	WT	ksp1-KD	OK	177.322	225.678	0.347895	2.04488	0.0039	0.0136416	yes	1.2727	No
YNL191W	YNL191W	YNL191W	.	.	XIV:280431-281505	WT	ksp1-KD	OK	63.4025	80.6537	0.347202	1.70837	0.0034	0.0121077	yes	1.27209	No
YNL023C	YNL023C	YNL023C	.	.	XIV:588262-591160	WT	ksp1-KD	OK	37.6196	47.8479	0.34697	1.61212	0.0062	0.0201974	yes	1.27189	No
YOL023W	YOL023W	YOL023W	.	.	XV:278055-280086	WT	ksp1-KD	OK	11.4953	14.6171	0.346614	1.85241	0.0077	0.0241052	yes	1.27157	No
YML068W	YML068W	YML068W	.	.	XIII:137549-138944	WT	ksp1-KD	OK	33.4683	42.5485	0.346313	1.73207	0.0048	0.016256	yes	1.27131	No
YER010C	YER010C	YER010C	.	.	V:172633-173338	WT	ksp1-KD	OK	114.515	145.561	0.346095	2.74866	0.00905	0.0274841	yes	1.27112	No
YBR179C	YBR179C	YBR179C	.	.	II:586546-589114	WT	ksp1-KD	OK	24.6845	31.376	0.346056	1.67253	0.0036	0.0127154	yes	1.27108	No
YNL100W	YNL100W	YNL100W	.	.	XIV:437612-438317	WT	ksp1-KD	OK	221.018	280.922	0.346007	1.79841	0.00515	0.017217	yes	1.27104	No
YMR267W	YMR267W	YMR267W	.	.	XIII:801771-802704	WT	ksp1-KD	OK	129.733	164.87	0.345778	2.26822	0.0041	0.014196	yes	1.27084	No
YAR023C	YAR023C	YAR023C	.	.	I:179280-179820	WT	ksp1-KD	OK	47.3411	60.1502	0.345477	1.5548	0.0147	0.0413752	yes	1.27057	No
YLR014C	YLR014C	YLR014C	.	.	XII:172267-174982	WT	ksp1-KD	OK	12.9878	16.5018	0.345468	1.6054	0.00475	0.0161118	yes	1.27056	No
YGR100W	YGR100W	YGR100W	.	.	VII:690244-693097	WT	ksp1-KD	OK	30.1509	38.3071	0.345413	1.65668	0.005	0.016802	yes	1.27051	No
YKR051W	YKR051W	YKR051W	.	.	XI:530945-532202	WT	ksp1-KD	OK	51.3894	65.2545	0.344606	1.67189	0.00435	0.0149818	yes	1.2698	No
YDR287W	YDR287W	YDR287W	.	.	IV:1035994-1036873	WT	ksp1-KD	OK	117.853	149.54	0.343543	1.94706	0.00445	0.0152374	yes	1.26887	No
YGR076C	YGR076C	YGR076C	.	.	VII:637103-637577	WT	ksp1-KD	OK	65.192	82.7164	0.343478	1.80156	0.0081	0.0251154	yes	1.26881	No
YER051W	YER051W	YER051W	.	.	V:254655-256134	WT	ksp1-KD	OK	36.7563	46.6041	0.342466	1.70876	0.00455	0.0155063	yes	1.26792	No
YKL093W	YKL093W	YKL093W	.	.	XI:264788-265808	WT	ksp1-KD	OK	46.3608	58.769	0.342148	2.41768	0.00485	0.0164082	yes	1.26764	No
YGR235C	YGR235C	YGR235C	.	.	VII:961359-962061	WT	ksp1-KD	OK	154.959	196.414	0.342007	1.69805	0.0045	0.0153843	yes	1.26752	No
YCL025C	YCL025C	YCL025C	.	.	III:76017-77919	WT	ksp1-KD	OK	13.4249	17.0162	0.342002	2.06501	0.0078	0.0243245	yes	1.26751	No
YFR008W	YFR008W	YFR008W	.	.	VI:160534-161200	WT	ksp1-KD	OK	25.6268	32.4819	0.341985	1.45735	0.0163	0.045059	yes	1.2675	No
YDR473C	YDR473C	YDR473C	.	.	IV:1404444-1405854	WT	ksp1-KD	OK	71.0947	90.0846	0.34154	2.1076	0.0045	0.0153843	yes	1.26711	No
YNL157W	YNL157W	YNL157W	.	.	XIV:340351-340858	WT	ksp1-KD	OK	354.818	449.564	0.341446	1.928	0.00865	0.0264922	yes	1.26703	No
YNL293W	YNL293W	YNL293W	.	.	XIV:80639-82541	WT	ksp1-KD	OK	20.8141	26.365	0.341064	1.65205	0.00645	0.020855	yes	1.26669	No
YLR240W	YLR240W	YLR240W	.	.	XII:617532-620160	WT	ksp1-KD	OK	22.8041	28.8837	0.340963	1.63822	0.00445	0.0152374	yes	1.2666	No
YGR286C	YGR286C	YGR286C	.	.	VII:1063812-1064940	WT	ksp1-KD	OK	36.8997	46.7191	0.340402	1.60487	0.00535	0.0177668	yes	1.26611	No
YGL250W	YGL250W	YGL250W	.	.	VII:31909-32635	WT	ksp1-KD	OK	60.8517	77.0361	0.340238	1.87946	0.01265	0.0364578	yes	1.26597	No
YBR033W	YBR033W	YBR033W	.	.	II:301943-304703	WT	ksp1-KD	OK	8.86868	11.2269	0.340172	1.53909	0.01085	0.0320665	yes	1.26591	No
YMR236W	YMR236W	YMR236W	.	.	XIII:742970-743444	WT	ksp1-KD	OK	218.649	276.781	0.340131	2.44683	0.00445	0.0152374	yes	1.26587	No
YDL121C	YDL121C	YDL121C	.	.	IV:245132-245582	WT	ksp1-KD	OK	102.28	129.461	0.339989	1.60135	0.0055	0.0182091	yes	1.26575	No
YDL141W	YDL141W	YDL141W	.	.	IV:203038-205111	WT	ksp1-KD	OK	30.7286	38.8921	0.339898	1.80065	0.0041	0.014196	yes	1.26567	No
YDR151C	YDR151C	YDR151C	.	.	IV:764177-765155	WT	ksp1-KD	OK	71.2698	90.1972	0.339793	1.70221	0.00445	0.0152374	yes	1.26557	No
YDR248C	YDR248C	YDR248C	.	.	IV:957757-958339	WT	ksp1-KD	OK	323.461	409.354	0.339756	2.84468	0.00325	0.0116373	yes	1.26554	No
YML091C	YML091C	YML091C	.	.	XIII:87122-90731	WT	ksp1-KD	OK	23.9673	30.3286	0.339611	1.58467	0.0095	0.028465	yes	1.26542	No
YPR011C	YPR011C	YPR011C	.	.	XVI:583061-584042	WT	ksp1-KD	OK	41.9146	53.0277	0.339295	1.93945	0.0051	0.0170586	yes	1.26514	No
YER060W-A	YER060W-A	YER060W-A	.	.	V:276571-278164	WT	ksp1-KD	OK	15.3135	19.3699	0.339009	1.57987	0.01095	0.0322447	yes	1.26489	No
YGR001C	YGR001C	YGR001C	.	.	VII:497132-498034	WT	ksp1-KD	OK	179.562	227.097	0.338832	1.79147	0.01095	0.0322447	yes	1.26473	No
YHR132W-A	YHR132W-A	YHR132W-A	.	.	VIII:370053-370449	WT	ksp1-KD	OK	382.856	484.177	0.338733	1.97217	0.00495	0.0166857	yes	1.26465	No
YCR048W	YCR048W	YCR048W	.	.	III:211870-213772	WT	ksp1-KD	OK	18.4103	23.2782	0.338464	1.82139	0.0092	0.0277838	yes	1.26441	No
YIL124W	YIL124W	YIL124W	.	.	IX:126203-127097	WT	ksp1-KD	OK	355.586	449.598	0.338438	1.94419	0.0152	0.0424698	yes	1.26439	No
YDR003W	YDR003W	YDR003W	.	.	IV:454121-454754	WT	ksp1-KD	OK	108.075	136.639	0.338339	1.65088	0.00525	0.0175063	yes	1.2643	No
YJL056C	YJL056C	YJL056C	.	.	X:330430-333073	WT	ksp1-KD	OK	8.14534	10.2931	0.337628	1.8552	0.0073	0.023109	yes	1.26368	No
YBR274W	YBR274W	YBR274W	.	.	II:749593-751177	WT	ksp1-KD	OK	23.7694	30.0273	0.337174	1.61683	0.0054	0.0179145	yes	1.26328	No
YIL071C	YIL071C	YIL071C	.	.	IX:228549-229994	WT	ksp1-KD	OK	56.8252	71.779	0.33703	1.54918	0.00895	0.0271931	yes	1.26315	No
YNL159C	YNL159C	YNL159C	.	.	XIV:338477-339347	WT	ksp1-KD	OK	73.3377	92.6141	0.336678	1.80668	0.00555	0.018356	yes	1.26285	No
YPR147C	YPR147C	YPR147C	.	.	XVI:825346-826559	WT	ksp1-KD	OK	137.512	173.599	0.336204	1.69522	0.01065	0.0315615	yes	1.26243	No
YBR151W	YBR151W	YBR151W	.	.	II:545027-545978	WT	ksp1-KD	OK	79.2482	99.9756	0.335197	1.57289	0.00745	0.0235265	yes	1.26155	No
YPL137C	YPL137C	YPL137C	.	.	XVI:292816-296654	WT	ksp1-KD	OK	19.3531	24.4143	0.335166	1.75889	0.01415	0.0400526	yes	1.26152	No
YLR454W	YLR454W	YLR454W	.	.	XII:1043997-1051884	WT	ksp1-KD	OK	9.13147	11.5175	0.334915	1.60492	0.0074	0.02338	yes	1.2613	No
YML094W	YML094W	YML094W	.	.	XIII:82218-82849	WT	ksp1-KD	OK	164.116	206.985	0.334805	1.81241	0.0044	0.0151219	yes	1.26121	No
YCL031C	YCL031C	YCL031C	.	.	III:64674-65568	WT	ksp1-KD	OK	103.898	131.036	0.334789	1.66868	0.00845	0.0259898	yes	1.26119	No
YLR287C	YLR287C	YLR287C	.	.	XII:710990-712058	WT	ksp1-KD	OK	88.8916	112.093	0.334574	1.59656	0.0077	0.0241052	yes	1.26101	No
YJR046W	YJR046W	YJR046W	.	.	X:522047-523862	WT	ksp1-KD	OK	24.0611	30.3302	0.334055	1.62206	0.0044	0.0151219	yes	1.26055	No
YOL107W	YOL107W	YOL107W	.	.	XV:112101-113130	WT	ksp1-KD	OK	34.2768	43.1916	0.333517	1.53505	0.0072	0.0228816	yes	1.26008	No
YMR005W	YMR005W	YMR005W	.	.	XIII:276044-277211	WT	ksp1-KD	OK	79.1325	99.6957	0.333261	1.55323	0.0095	0.028465	yes	1.25986	No
YOL072W	YOL072W	YOL072W	.	.	XV:194969-196337	WT	ksp1-KD	OK	36.8023	46.3374	0.332383	1.64887	0.0051	0.0170586	yes	1.25909	No
YBR001C	YBR001C	YBR001C	.	.	II:238940-241283	WT	ksp1-KD	OK	62.526	78.713	0.332146	1.7826	0.007	0.0223663	yes	1.25888	No
YJR051W	YJR051W	YJR051W	.	.	X:529860-531366	WT	ksp1-KD	OK	81.505	102.598	0.332045	1.49664	0.0097	0.0290107	yes	1.2588	No
YGL090W	YGL090W	YGL090W	.	.	VII:343318-344584	WT	ksp1-KD	OK	44.3172	55.7845	0.331999	2.03476	0.00865	0.0264922	yes	1.25876	No
YML099C	YML099C	YML099C	.	.	XIII:74228-77040	WT	ksp1-KD	OK	44.7337	56.3003	0.331781	1.51021	0.0163	0.045059	yes	1.25857	No
YPR020W	YPR020W	YPR020W	.	.	XVI:599869-600217	WT	ksp1-KD	OK	360.111	453.168	0.331605	1.59064	0.0048	0.016256	yes	1.25841	No
YJR049C	YJR049C	YJR049C	.	.	X:526883-528476	WT	ksp1-KD	OK	83.9051	105.546	0.331041	1.50103	0.01055	0.031308	yes	1.25792	No
YDR465C	YDR465C	YDR465C	.	.	IV:1393335-1394574	WT	ksp1-KD	OK	161.372	202.968	0.330864	1.63222	0.01275	0.0366972	yes	1.25777	No
YDL049C	YDL049C	YDL049C	.	.	IV:365067-365874	WT	ksp1-KD	OK	26.0474	32.755	0.330577	1.37818	0.0157	0.0435672	yes	1.25752	No
YDR289C	YDR289C	YDR289C	.	.	IV:1038279-1039699	WT	ksp1-KD	OK	124.803	156.935	0.330519	2.59995	0.006	0.0196344	yes	1.25747	No
YJL168C	YJL168C	YJL168C	.	.	X:102098-104428	WT	ksp1-KD	OK	15.1039	18.9819	0.329708	2.00673	0.01115	0.0327594	yes	1.25676	No
YMR269W	YMR269W	YMR269W	.	.	XIII:804455-805091	WT	ksp1-KD	OK	319.364	401.347	0.32965	4.02084	0.00725	0.0230067	yes	1.25671	No
YOR019W	YOR019W	YOR019W	.	.	XV:368126-370319	WT	ksp1-KD	OK	8.43245	10.5894	0.328599	1.55429	0.0141	0.0399459	yes	1.25579	No
YER123W	YER123W	YER123W	.	.	V:404812-406387	WT	ksp1-KD	OK	55.9316	70.2236	0.328293	1.62085	0.00875	0.026748	yes	1.25553	No
YDR082W	YDR082W	YDR082W	.	.	IV:610440-611925	WT	ksp1-KD	OK	28.3626	35.608	0.328214	1.70403	0.0076	0.0238841	yes	1.25546	No
YEL050C	YEL050C	YEL050C	.	.	V:59548-60851	WT	ksp1-KD	OK	58.343	73.2427	0.328127	1.54807	0.00895	0.0271931	yes	1.25538	No
YDR336W	YDR336W	YDR336W	.	.	IV:1145091-1146036	WT	ksp1-KD	OK	49.7761	62.4829	0.328008	1.49878	0.0104	0.0309052	yes	1.25528	No
YPR155C	YPR155C	YPR155C	.	.	XVI:835562-837413	WT	ksp1-KD	OK	26.956	33.8355	0.327929	1.57573	0.0064	0.0207243	yes	1.25521	No
YOR056C	YOR056C	YOR056C	.	.	XV:430246-431626	WT	ksp1-KD	OK	95.9593	120.438	0.327802	1.43588	0.0149	0.0417753	yes	1.2551	No
YHR164C	YHR164C	YHR164C	.	.	VIII:424609-429178	WT	ksp1-KD	OK	9.26684	11.6253	0.327116	1.64105	0.00715	0.0227784	yes	1.2545	No
YPL109C	YPL109C	YPL109C	.	.	XVI:345263-347389	WT	ksp1-KD	OK	31.0857	38.9857	0.326697	1.58073	0.0054	0.0179145	yes	1.25414	No
YKL214C	YKL214C	YKL214C	.	.	XI:31081-31693	WT	ksp1-KD	OK	143.841	180.286	0.32582	1.60164	0.00525	0.0175063	yes	1.25338	No
YOR075W	YOR075W	YOR075W	.	.	XV:468211-469252	WT	ksp1-KD	OK	51.7885	64.9049	0.325696	1.71075	0.0078	0.0243245	yes	1.25327	No
YBL028C	YBL028C	YBL028C	.	.	II:167517-167838	WT	ksp1-KD	OK	745.509	934.22	0.325537	2.48415	0.00835	0.0257066	yes	1.25313	No
YDR386W	YDR386W	YDR386W	.	.	IV:1246083-1247982	WT	ksp1-KD	OK	19.5642	24.5159	0.325502	1.59433	0.00785	0.0244569	yes	1.2531	No
YBR280C	YBR280C	YBR280C	.	.	II:762783-764697	WT	ksp1-KD	OK	25.2283	31.609	0.325292	1.62187	0.0058	0.0190471	yes	1.25292	No
YFL041W	YFL041W	YFL041W	.	.	VI:49138-51007	WT	ksp1-KD	OK	34.7107	43.486	0.32517	2.35849	0.00935	0.0281322	yes	1.25281	No
YIL073C	YIL073C	YIL073C	.	.	IX:222936-225954	WT	ksp1-KD	OK	11.4245	14.3046	0.324339	1.75042	0.0092	0.0277838	yes	1.25209	No
YHR161C	YHR161C	YHR161C	.	.	VIII:420372-422286	WT	ksp1-KD	OK	49.8204	62.3716	0.324151	1.46806	0.0141	0.0399459	yes	1.25193	No
YBR165W	YBR165W	YBR165W	.	.	II:568851-569685	WT	ksp1-KD	OK	57.1422	71.5356	0.324104	1.52555	0.00835	0.0257066	yes	1.25189	No
YOR336W	YOR336W	YOR336W	.	.	XV:949772-953870	WT	ksp1-KD	OK	13.9688	17.4864	0.324024	1.56369	0.00625	0.0203399	yes	1.25182	No
YDR377W	YDR377W	YDR377W	.	.	IV:1228610-1228916	WT	ksp1-KD	OK	773.844	968.687	0.323989	1.66947	0.0105	0.0311738	yes	1.25179	No
YLR270W	YLR270W	YLR270W	.	.	XII:680865-682238	WT	ksp1-KD	OK	130.25	163.012	0.323694	1.35203	0.01645	0.0453387	yes	1.25153	No
YAL009W	YAL009W	YAL009W	.	.	I:135853-136633	WT	ksp1-KD	OK	44.6205	55.8235	0.323166	1.48417	0.00965	0.0288878	yes	1.25107	No
YER161C	YER161C	YER161C	.	.	V:499346-500348	WT	ksp1-KD	OK	45.2652	56.6246	0.323025	1.74386	0.00635	0.0206446	yes	1.25095	No
YCR061W	YCR061W	YCR061W	.	.	III:225562-227458	WT	ksp1-KD	OK	14.2718	17.8502	0.322772	1.85177	0.00615	0.0200647	yes	1.25073	No
YNL284C	YNL284C	YNL284C	.	.	XIV:103133-104102	WT	ksp1-KD	OK	51.2569	64.0756	0.322028	1.55113	0.0077	0.0241052	yes	1.25009	No
YDR178W	YDR178W	YDR178W	.	.	IV:817949-818495	WT	ksp1-KD	OK	320.392	400.282	0.321175	1.38512	0.01795	0.0487697	yes	1.24935	No
YGL141W	YGL141W	YGL141W	.	.	VII:238352-241085	WT	ksp1-KD	OK	34.3768	42.9445	0.321038	1.49687	0.0107	0.0316808	yes	1.24923	No
YLR117C	YLR117C	YLR117C	.	.	XII:382470-384534	WT	ksp1-KD	OK	34.9039	43.5822	0.320352	1.54893	0.00665	0.0213529	yes	1.24864	No
YDR014W	YDR014W	YDR014W	.	.	IV:474045-475989	WT	ksp1-KD	OK	11.6894	14.5922	0.319996	1.40007	0.0164	0.04522	yes	1.24833	No
YJR052W	YJR052W	YJR052W	.	.	X:532061-533759	WT	ksp1-KD	OK	31.7314	39.5987	0.319542	1.53937	0.00715	0.0227784	yes	1.24793	No
YDR105C	YDR105C	YDR105C	.	.	IV:665348-666770	WT	ksp1-KD	OK	41.1844	51.3887	0.319354	1.81772	0.00755	0.023773	yes	1.24777	No
YML065W	YML065W	YML065W	.	.	XIII:142209-144954	WT	ksp1-KD	OK	19.6473	24.5025	0.318598	1.6327	0.0072	0.0228816	yes	1.24712	No
YGR117C	YGR117C	YGR117C	.	.	VII:725048-726479	WT	ksp1-KD	OK	43.0982	53.7397	0.31836	1.56687	0.008	0.0248409	yes	1.24691	No
YML114C	YML114C	YML114C	.	.	XIII:42042-43575	WT	ksp1-KD	OK	28.7134	35.8009	0.31827	1.59459	0.0073	0.023109	yes	1.24683	No
YOR171C	YOR171C	YOR171C	.	.	XV:651857-653884	WT	ksp1-KD	OK	37.8843	47.2255	0.317966	1.47643	0.01195	0.034671	yes	1.24657	No
YPL174C	YPL174C	YPL174C	.	.	XVI:220166-222773	WT	ksp1-KD	OK	24.4418	30.4536	0.317263	1.80881	0.00875	0.026748	yes	1.24596	No
YGR197C	YGR197C	YGR197C	.	.	VII:892496-894140	WT	ksp1-KD	OK	32.3863	40.3477	0.317103	1.60771	0.0083	0.0256133	yes	1.24583	No
YOL124C	YOL124C	YOL124C	.	.	XV:85455-86757	WT	ksp1-KD	OK	33.2921	41.472	0.316957	1.52956	0.0094	0.0282174	yes	1.2457	No
YKR028W	YKR028W	YKR028W	.	.	XI:494256-497358	WT	ksp1-KD	OK	33.5383	41.7783	0.316944	1.61314	0.01125	0.0329787	yes	1.24569	No
YBR237W	YBR237W	YBR237W	.	.	II:691968-694518	WT	ksp1-KD	OK	23.8122	29.656	0.316625	1.55418	0.0073	0.023109	yes	1.24541	No
YMR319C	YMR319C	YMR319C	.	.	XIII:912879-914538	WT	ksp1-KD	OK	91.5595	113.99	0.316122	1.59991	0.01555	0.0432803	yes	1.24498	No
YDL200C	YDL200C	YDL200C	.	.	IV:100500-101067	WT	ksp1-KD	OK	226.218	281.615	0.316011	1.68246	0.00855	0.0262353	yes	1.24488	No
YHR121W	YHR121W	YHR121W	.	.	VIII:352755-353319	WT	ksp1-KD	OK	94.2431	117.288	0.315594	2.64006	0.00825	0.0254832	yes	1.24452	No
YKL149C	YKL149C	YKL149C	.	.	XI:167611-168829	WT	ksp1-KD	OK	39.9489	49.6874	0.314726	1.64121	0.01505	0.0421595	yes	1.24378	No
YLR015W	YLR015W	YLR015W	.	.	XII:175226-176744	WT	ksp1-KD	OK	33.1067	41.164	0.314259	1.55055	0.0102	0.0303803	yes	1.24337	No
YHR115C	YHR115C	YHR115C	.	.	VIII:340108-341359	WT	ksp1-KD	OK	46.188	57.424	0.314136	1.65271	0.0117	0.0340673	yes	1.24327	No
YCR016W	YCR016W	YCR016W	.	.	III:143633-144506	WT	ksp1-KD	OK	161.018	200.174	0.314035	2.31882	0.0077	0.0241052	yes	1.24318	No
YEL072W	YEL072W	YEL072W	.	.	V:13719-14415	WT	ksp1-KD	OK	124.853	155.181	0.313715	1.52654	0.0105	0.0311738	yes	1.2429	No
YCR095C	YCR095C	YCR095C	.	.	III:288169-289258	WT	ksp1-KD	OK	42.5015	52.8206	0.313586	1.49831	0.0093	0.0280077	yes	1.24279	No
YBR220C	YBR220C	YBR220C	.	.	II:662498-664677	WT	ksp1-KD	OK	18.6722	23.2003	0.313255	1.63421	0.0104	0.0309052	yes	1.24251	No
YDR288W	YDR288W	YDR288W	.	.	IV:1037194-1038106	WT	ksp1-KD	OK	55.1501	68.5244	0.313254	1.52867	0.0092	0.0277838	yes	1.24251	No
YLR443W	YLR443W	YLR443W	.	.	XII:1022624-1023988	WT	ksp1-KD	OK	25.4869	31.6672	0.313231	1.61918	0.01815	0.0492307	yes	1.24249	No
YOL159C	YOL159C	YOL159C	.	.	XV:17280-17796	WT	ksp1-KD	OK	73.5754	91.3955	0.312901	1.45532	0.0138	0.0392157	yes	1.2422	No
YDR098C	YDR098C	YDR098C	.	.	IV:644177-644930	WT	ksp1-KD	OK	86.1013	106.928	0.312531	1.5382	0.0088	0.0268882	yes	1.24188	No
YBL026W	YBL026W	YBL026W	.	.	II:170622-171038	WT	ksp1-KD	OK	508.326	631.252	0.312461	1.53945	0.011	0.0323626	yes	1.24182	No
YLR091W	YLR091W	YLR091W	.	.	XII:322296-323178	WT	ksp1-KD	OK	17.9505	22.2869	0.312177	2.63697	0.0176	0.0479591	yes	1.24158	No
YOR358W	YOR358W	YOR358W	.	.	XV:1010160-1010889	WT	ksp1-KD	OK	62.7712	77.8839	0.311223	1.41862	0.0142	0.0401767	yes	1.24076	No
YIL019W	YIL019W	YIL019W	.	.	IX:315092-316133	WT	ksp1-KD	OK	101.913	126.433	0.31104	2.02153	0.00975	0.0291468	yes	1.2406	No
YER007W	YER007W	YER007W	.	.	V:164343-166083	WT	ksp1-KD	OK	19.5921	24.2899	0.310086	1.41937	0.0167	0.0458527	yes	1.23978	No
YMR268C	YMR268C	YMR268C	.	.	XIII:802887-804222	WT	ksp1-KD	OK	25.4357	31.5132	0.309102	1.40879	0.01325	0.0379514	yes	1.23894	No
YIL127C	YIL127C	YIL127C	.	.	IX:117023-117644	WT	ksp1-KD	OK	87.3138	108.132	0.308508	1.5289	0.01095	0.0322447	yes	1.23843	No
YOR256C	YOR256C	YOR256C	.	.	XV:808253-810683	WT	ksp1-KD	OK	32.5311	40.2852	0.308433	1.52621	0.01095	0.0322447	yes	1.23836	No
YMR239C	YMR239C	YMR239C	.	.	XIII:748261-749677	WT	ksp1-KD	OK	54.3979	67.284	0.306711	1.46013	0.01095	0.0322447	yes	1.23688	No
YBR242W	YBR242W	YBR242W	.	.	II:704669-705386	WT	ksp1-KD	OK	226.971	280.696	0.306506	1.4534	0.0135	0.0385147	yes	1.23671	No
YAL011W	YAL011W	YAL011W	.	.	I:132198-134076	WT	ksp1-KD	OK	15.0379	18.5937	0.306209	2.20999	0.00985	0.0294323	yes	1.23645	No
YMR294W	YMR294W	YMR294W	.	.	XIII:856965-858087	WT	ksp1-KD	OK	135.582	167.457	0.304627	3.08346	0.00885	0.0270029	yes	1.2351	No
YPL162C	YPL162C	YPL162C	.	.	XVI:243205-244027	WT	ksp1-KD	OK	49.3668	60.949	0.304062	1.45627	0.01165	0.033937	yes	1.23462	No
YCL008C	YCL008C	YCL008C	.	.	III:105695-106853	WT	ksp1-KD	OK	22.8659	28.2255	0.303801	3.0997	0.0116	0.033852	yes	1.23439	No
YGL068W	YGL068W	YGL068W	.	.	VII:375049-375671	WT	ksp1-KD	OK	112.129	138.361	0.303285	1.50696	0.01135	0.0332418	yes	1.23395	No
YCL002C	YCL002C	YCL002C	.	.	III:110807-111675	WT	ksp1-KD	OK	68.1114	84.0397	0.303175	1.48561	0.01155	0.0337516	yes	1.23386	No
YKL011C	YKL011C	YKL011C	.	.	XI:420154-421216	WT	ksp1-KD	OK	27.8826	34.3821	0.302293	1.44873	0.0184	0.0497014	yes	1.2331	No
YDL120W	YDL120W	YDL120W	.	.	IV:245922-246447	WT	ksp1-KD	OK	349.454	430.911	0.302287	3.20887	0.01115	0.0327594	yes	1.2331	No
YBL054W	YBL054W	YBL054W	.	.	II:117588-119166	WT	ksp1-KD	OK	36.3209	44.763	0.301505	3.04299	0.0148	0.0415487	yes	1.23243	No
YKR074W	YKR074W	YKR074W	.	.	XI:579208-579676	WT	ksp1-KD	OK	255.789	315.182	0.301229	1.65689	0.0113	0.0331103	yes	1.23219	No
YGL163C	YGL163C	YGL163C	.	.	VII:193706-196403	WT	ksp1-KD	OK	46.5205	57.315	0.301048	1.6246	0.0135	0.0385147	yes	1.23204	No
YCR035C	YCR035C	YCR035C	.	.	III:191833-193018	WT	ksp1-KD	OK	75.9805	93.5089	0.299475	1.37909	0.01675	0.0459705	yes	1.2307	No
YPL122C	YPL122C	YPL122C	.	.	XVI:319225-320767	WT	ksp1-KD	OK	29.3612	36.127	0.299164	1.40301	0.0151	0.0422449	yes	1.23043	No
YML088W	YML088W	YML088W	.	.	XIII:92234-94241	WT	ksp1-KD	OK	69.1792	85.0841	0.298551	1.50413	0.01715	0.0469296	yes	1.22991	No
YOL071W	YOL071W	YOL071W	.	.	XV:196506-196995	WT	ksp1-KD	OK	97.6502	120.083	0.298334	1.51721	0.0167	0.0458527	yes	1.22972	No
YGR266W	YGR266W	YGR266W	.	.	VII:1022655-1024761	WT	ksp1-KD	OK	36.7571	45.1976	0.298225	1.51945	0.01595	0.0441854	yes	1.22963	No
YGR283C	YGR283C	YGR283C	.	.	VII:1059014-1060040	WT	ksp1-KD	OK	32.2729	39.6795	0.298073	1.73335	0.01515	0.0423483	yes	1.2295	No
YOR030W	YOR030W	YOR030W	.	.	XV:386824-388684	WT	ksp1-KD	OK	36.4057	44.7428	0.297492	1.53745	0.01465	0.0412523	yes	1.22901	No
YDL008W	YDL008W	YDL008W	.	.	IV:433496-433994	WT	ksp1-KD	OK	202.885	249.249	0.296923	1.59044	0.01145	0.0334894	yes	1.22852	No
YHR150W	YHR150W	YHR150W	.	.	VIII:397250-398990	WT	ksp1-KD	OK	37.099	45.5728	0.296794	1.4717	0.01325	0.0379514	yes	1.22841	No
YDR387C	YDR387C	YDR387C	.	.	IV:1248153-1249821	WT	ksp1-KD	OK	48.1866	59.1424	0.295562	1.3924	0.0178	0.0484229	yes	1.22736	No
YKL027W	YKL027W	YKL027W	.	.	XI:387561-388905	WT	ksp1-KD	OK	98.1218	120.358	0.294683	1.80286	0.01475	0.04148	yes	1.22662	No
YNL022C	YNL022C	YNL022C	.	.	XIV:591426-592899	WT	ksp1-KD	OK	41.7316	51.1752	0.294305	1.42356	0.0132	0.0378583	yes	1.22629	No
YMR077C	YMR077C	YMR077C	.	.	XIII:421483-422149	WT	ksp1-KD	OK	436.576	535.102	0.293581	3.1297	0.0145	0.0408654	yes	1.22568	No
YBR259W	YBR259W	YBR259W	.	.	II:730386-732453	WT	ksp1-KD	OK	17.1473	21.0162	0.293518	1.42127	0.01775	0.0483071	yes	1.22563	No
YPR161C	YPR161C	YPR161C	.	.	XVI:864448-866422	WT	ksp1-KD	OK	44.5001	54.5205	0.292989	1.44536	0.0185	0.0499508	yes	1.22518	No
YOR354C	YOR354C	YOR354C	.	.	XV:1001146-1003225	WT	ksp1-KD	OK	23.5314	28.8215	0.292562	1.56392	0.01665	0.0457928	yes	1.22481	No
YEL044W	YEL044W	YEL044W	.	.	V:69756-70257	WT	ksp1-KD	OK	493.023	603.691	0.292156	2.94447	0.0162	0.0448398	yes	1.22447	No
YHR114W	YHR114W	YHR114W	.	.	VIII:338082-339984	WT	ksp1-KD	OK	47.7107	58.417	0.292076	1.56082	0.0157	0.0435672	yes	1.2244	No
YJR089W	YJR089W	YJR089W	.	.	X:587717-590582	WT	ksp1-KD	OK	25.1442	30.7758	0.291569	1.5901	0.0133	0.0380611	yes	1.22397	No
YBR215W	YBR215W	YBR215W	.	.	II:653355-655317	WT	ksp1-KD	OK	24.9142	30.4729	0.290557	1.46337	0.0135	0.0385147	yes	1.22311	No
YLL004W	YLL004W	YLL004W	.	.	XII:141072-142923	WT	ksp1-KD	OK	20.3651	24.9073	0.290466	1.62949	0.0145	0.0408654	yes	1.22304	No
YLR127C	YLR127C	YLR127C	.	.	XII:395757-398319	WT	ksp1-KD	OK	16.4818	20.1508	0.289966	1.40571	0.01555	0.0432803	yes	1.22261	No
YOR016C	YOR016C	YOR016C	.	.	XV:360460-361084	WT	ksp1-KD	OK	82.6273	100.957	0.28905	1.52218	0.0151	0.0422449	yes	1.22184	No
YOR172W	YOR172W	YOR172W	.	.	XV:654209-656570	WT	ksp1-KD	OK	18.6453	22.7725	0.288483	1.37879	0.0157	0.0435672	yes	1.22136	No
YDR364C	YDR364C	YDR364C	.	.	IV:1202842-1204210	WT	ksp1-KD	OK	49.109	59.8271	0.284812	1.46431	0.0169	0.0463431	yes	1.21825	No
YER038C	YER038C	YER038C	.	.	V:226857-228252	WT	ksp1-KD	OK	47.2235	57.4862	0.283711	1.47246	0.01825	0.0494195	yes	1.21732	No
YGR002C	YGR002C	YGR002C	.	.	VII:498475-499906	WT	ksp1-KD	OK	32.9351	40.0634	0.282657	1.42389	0.01785	0.0485386	yes	1.21643	No
YBR231C	YBR231C	YBR231C	.	.	II:682178-683090	WT	ksp1-KD	OK	141.227	171.724	0.282074	2.28689	0.01835	0.0496076	yes	1.21594	No
YCL051W	YCL051W	YCL051W	.	.	III:35864-37616	WT	ksp1-KD	OK	35.4826	29.1678	-0.282734	-1.53589	0.0181	0.0491361	yes	0.822032	No
YHL026C	YHL026C	YHL026C	.	.	VIII:53218-54166	WT	ksp1-KD	OK	66.6103	54.7536	-0.282791	-1.35717	0.0172	0.0470466	yes	0.821999	No
YLR052W	YLR052W	YLR052W	.	.	XII:247200-247953	WT	ksp1-KD	OK	54.7017	44.8973	-0.284958	-2.28074	0.01745	0.0476302	yes	0.820766	No
YOR291W	YOR291W	YOR291W	.	.	XV:861174-865593	WT	ksp1-KD	OK	14.1551	11.6169	-0.2851	-1.36534	0.01765	0.0480752	yes	0.820685	No
YOR178C	YOR178C	YOR178C	.	.	XV:667859-670241	WT	ksp1-KD	OK	12.2928	10.0885	-0.285106	-1.54948	0.0183	0.0495342	yes	0.820681	No
YCR051W	YCR051W	YCR051W	.	.	III:214070-214739	WT	ksp1-KD	OK	200.805	164.752	-0.2855	-1.44422	0.0184	0.0497014	yes	0.820457	No
YGR113W	YGR113W	YGR113W	.	.	VII:718892-719924	WT	ksp1-KD	OK	54.3761	44.5997	-0.285939	-1.37869	0.01635	0.0451396	yes	0.820208	No
YCR052W	YCR052W	YCR052W	.	.	III:214993-216445	WT	ksp1-KD	OK	42.5162	34.8407	-0.287241	-2.22386	0.01835	0.0496076	yes	0.819468	No
YDR113C	YDR113C	YDR113C	.	.	IV:680495-681617	WT	ksp1-KD	OK	52.6165	43.0789	-0.288535	-1.45544	0.01725	0.0471041	yes	0.818733	No
YHR123W	YHR123W	YHR123W	.	.	VIII:354814-356081	WT	ksp1-KD	OK	35.2622	28.8648	-0.288813	-2.05902	0.01635	0.0451396	yes	0.818575	No
YJR124C	YJR124C	YJR124C	.	.	X:652891-654238	WT	ksp1-KD	OK	52.1256	42.6663	-0.288894	-1.46972	0.01775	0.0483071	yes	0.818529	No
YPL258C	YPL258C	YPL258C	.	.	XVI:53497-55153	WT	ksp1-KD	OK	29.273	23.9602	-0.288928	-1.36888	0.01725	0.0471041	yes	0.81851	No
YBR160W	YBR160W	YBR160W	.	.	II:560077-560974	WT	ksp1-KD	OK	130.729	106.934	-0.289856	-1.42398	0.0145	0.0408654	yes	0.817984	No
YJL057C	YJL057C	YJL057C	.	.	X:328117-330121	WT	ksp1-KD	OK	32.1381	26.2795	-0.290346	-1.4181	0.0129	0.0370961	yes	0.817706	No
YPL066W	YPL066W	YPL066W	.	.	XVI:426232-427672	WT	ksp1-KD	OK	26.4773	21.6084	-0.293169	-2.09029	0.01555	0.0432803	yes	0.816107	No
YDR379W	YDR379W	YDR379W	.	.	IV:1230166-1233196	WT	ksp1-KD	OK	19.2935	15.7417	-0.293528	-1.83554	0.01595	0.0441854	yes	0.815904	No
YMR033W	YMR033W	YMR033W	.	.	XIII:337787-339277	WT	ksp1-KD	OK	60.4389	49.2334	-0.295842	-1.48614	0.01585	0.0439646	yes	0.814597	No
YNL298W	YNL298W	YNL298W	.	.	XIV:68914-71443	WT	ksp1-KD	OK	21.7519	17.6795	-0.29906	-1.58449	0.0143	0.0404244	yes	0.812782	No
YNL108C	YNL108C	YNL108C	.	.	XIV:418963-419826	WT	ksp1-KD	OK	80.103	65.0629	-0.30002	-1.55932	0.01565	0.0435213	yes	0.812241	No
YHL008C	YHL008C	YHL008C	.	.	VIII:92626-94510	WT	ksp1-KD	OK	33.7623	27.4203	-0.30017	-1.46357	0.0112	0.0328618	yes	0.812157	No
YFR005C	YFR005C	YFR005C	.	.	VI:154526-155873	WT	ksp1-KD	OK	49.1734	39.9239	-0.300624	-1.73634	0.01425	0.0403006	yes	0.811901	No
YJR142W	YJR142W	YJR142W	.	.	X:697140-698169	WT	ksp1-KD	OK	141.378	114.642	-0.302424	-2.3008	0.0132	0.0378583	yes	0.810889	No
YMR192W	YMR192W	YMR192W	.	.	XIII:647117-649280	WT	ksp1-KD	OK	22.2445	18.0205	-0.303809	-1.45069	0.00895	0.0271931	yes	0.810111	No
YER007C-A	YER007C-A	YER007C-A	.	.	V:166236-166885	WT	ksp1-KD	OK	365.993	296.464	-0.303958	-1.54639	0.0164	0.04522	yes	0.810027	No
YJL082W	YJL082W	YJL082W	.	.	X:281184-283380	WT	ksp1-KD	OK	69.1157	55.9843	-0.303991	-1.51125	0.01755	0.0478831	yes	0.810009	No
YDR027C	YDR027C	YDR027C	.	.	IV:494648-497318	WT	ksp1-KD	OK	22.2696	18.0018	-0.306929	-1.54046	0.0104	0.0309052	yes	0.808361	No
YKL020C	YKL020C	YKL020C	.	.	XI:398831-402080	WT	ksp1-KD	OK	28.4792	23.003	-0.308085	-1.41233	0.0148	0.0415487	yes	0.807713	No
YLR383W	YLR383W	YLR383W	.	.	XII:885287-888632	WT	ksp1-KD	OK	18.152	14.6529	-0.30895	-1.81841	0.0136	0.038749	yes	0.807229	No
YLL021W	YLL021W	YLL021W	.	.	XII:100946-105347	WT	ksp1-KD	OK	22.6451	18.2606	-0.310464	-1.43003	0.01395	0.0396073	yes	0.806382	No
YDL040C	YDL040C	YDL040C	.	.	IV:378873-381438	WT	ksp1-KD	OK	54.3713	43.7922	-0.312172	-1.36881	0.01725	0.0471041	yes	0.805428	No
YGL172W	YGL172W	YGL172W	.	.	VII:180699-182118	WT	ksp1-KD	OK	59.5112	47.9278	-0.312299	-1.57708	0.01065	0.0315615	yes	0.805357	No
YMR183C	YMR183C	YMR183C	.	.	XIII:626920-627808	WT	ksp1-KD	OK	162.536	130.831	-0.313057	-1.93591	0.00875	0.026748	yes	0.804934	No
YIR036C	YIR036C	YIR036C	.	.	IX:422073-423036	WT	ksp1-KD	OK	159.261	128.102	-0.314096	-1.47333	0.0181	0.0491361	yes	0.804355	No
YDR292C	YDR292C	YDR292C	.	.	IV:1043145-1045011	WT	ksp1-KD	OK	72.9801	58.6673	-0.314947	-1.39122	0.017	0.046578	yes	0.803881	No
YDR413C	YDR413C	YDR413C	.	.	IV:1294692-1295411	WT	ksp1-KD	OK	69.2754	55.689	-0.314951	-1.65261	0.01285	0.0369686	yes	0.803878	No
YBR150C	YBR150C	YBR150C	.	.	II:541208-544493	WT	ksp1-KD	OK	13.4486	10.8101	-0.315076	-1.69908	0.0091	0.0276101	yes	0.803809	No
YAL007C	YAL007C	YAL007C	.	.	I:137697-138345	WT	ksp1-KD	OK	154.763	124.39	-0.315188	-1.55822	0.00925	0.0278959	yes	0.803746	No
YLR047C	YLR047C	YLR047C	.	.	XII:239346-241407	WT	ksp1-KD	OK	13.4142	10.7753	-0.316032	-1.4626	0.0182	0.0493252	yes	0.803276	No
YDR389W	YDR389W	YDR389W	.	.	IV:1252536-1254501	WT	ksp1-KD	OK	33.2904	26.7379	-0.316221	-1.5207	0.00755	0.023773	yes	0.803171	No
YLR049C	YLR049C	YLR049C	.	.	XII:243885-245172	WT	ksp1-KD	OK	58.0379	46.5798	-0.317291	-1.59687	0.00785	0.0244569	yes	0.802575	No
YGL237C	YGL237C	YGL237C	.	.	VII:52730-53528	WT	ksp1-KD	OK	30.1852	24.2134	-0.318033	-1.53286	0.01465	0.0412523	yes	0.802163	No
YJR134C	YJR134C	YJR134C	.	.	X:673728-675852	WT	ksp1-KD	OK	48.9127	39.2189	-0.318658	-1.55236	0.00825	0.0254832	yes	0.801815	No
YCR043C	YCR043C	YCR043C	.	.	III:206260-206644	WT	ksp1-KD	OK	248.788	199.47	-0.318743	-1.45392	0.01145	0.0334894	yes	0.801768	No
YJR003C	YJR003C	YJR003C	.	.	X:440993-442553	WT	ksp1-KD	OK	24.7201	19.7879	-0.321065	-1.86333	0.00895	0.0271931	yes	0.800479	No
YDR444W	YDR444W	YDR444W	.	.	IV:1350289-1352589	WT	ksp1-KD	OK	29.3807	23.5134	-0.321381	-1.56665	0.01225	0.0354465	yes	0.800303	No
YCR065W	YCR065W	YCR065W	.	.	III:229309-231004	WT	ksp1-KD	OK	25.6536	20.5284	-0.321541	-2.14274	0.00835	0.0257066	yes	0.800215	No
YLR430W	YLR430W	YLR430W	.	.	XII:993433-1000129	WT	ksp1-KD	OK	19.5451	15.6349	-0.322032	-1.42693	0.0138	0.0392157	yes	0.799942	No
YOR346W	YOR346W	YOR346W	.	.	XV:981811-984785	WT	ksp1-KD	OK	17.6138	14.0847	-0.32258	-1.60863	0.008	0.0248409	yes	0.799639	No
YOL056W	YOL056W	YOL056W	.	.	XV:223267-224179	WT	ksp1-KD	OK	87.0555	69.5619	-0.323638	-1.65382	0.0078	0.0243245	yes	0.799052	No
YGL093W	YGL093W	YGL093W	.	.	VII:334885-337639	WT	ksp1-KD	OK	28.6532	22.8866	-0.32419	-1.54479	0.0073	0.023109	yes	0.798747	No
YKR067W	YKR067W	YKR067W	.	.	XI:567917-570149	WT	ksp1-KD	OK	34.1331	27.257	-0.324547	-1.71543	0.0094	0.0282174	yes	0.798549	No
YDR441C	YDR441C	YDR441C	.	.	IV:1344516-1345062	WT	ksp1-KD	OK	289.527	231.179	-0.324684	-1.6571	0.0075	0.0236614	yes	0.798473	No
YOR224C	YOR224C	YOR224C	.	.	XV:760824-761265	WT	ksp1-KD	OK	273.841	218.603	-0.325026	-1.71757	0.006	0.0196344	yes	0.798284	No
YPL184C	YPL184C	YPL184C	.	.	XVI:195949-197788	WT	ksp1-KD	OK	46.1861	36.8655	-0.325186	-1.5586	0.00615	0.0200647	yes	0.798195	No
YER157W	YER157W	YER157W	.	.	V:484787-487193	WT	ksp1-KD	OK	35.3952	28.2471	-0.325453	-1.60746	0.0056	0.0184743	yes	0.798048	No
YKR090W	YKR090W	YKR090W	.	.	XI:608945-611066	WT	ksp1-KD	OK	16.5672	13.213	-0.326371	-1.54824	0.00825	0.0254832	yes	0.79754	No
YNL288W	YNL288W	YNL288W	.	.	XIV:90302-91424	WT	ksp1-KD	OK	76.8631	61.2804	-0.326864	-2.73576	0.0086	0.0263763	yes	0.797268	No
YOR238W	YOR238W	YOR238W	.	.	XV:783676-784588	WT	ksp1-KD	OK	76.7138	61.1497	-0.327139	-1.73207	0.0062	0.0201974	yes	0.797116	No
YKL095W	YKL095W	YKL095W	.	.	XI:262276-263113	WT	ksp1-KD	OK	82.8779	66.0478	-0.327477	-1.76863	0.008	0.0248409	yes	0.796929	No
YPR060C	YPR060C	YPR060C	.	.	XVI:674860-675631	WT	ksp1-KD	OK	137.466	109.54	-0.327622	-1.81127	0.00755	0.023773	yes	0.796849	No
YGL190C	YGL190C	YGL190C	.	.	VII:145808-147389	WT	ksp1-KD	OK	94.9843	75.6632	-0.328098	-1.54235	0.00865	0.0264922	yes	0.796586	No
YHR079C	YHR079C	YHR079C	.	.	VIII:258243-261591	WT	ksp1-KD	OK	24.3959	19.426	-0.328652	-1.59303	0.0064	0.0207243	yes	0.79628	No
YDR107C	YDR107C	YDR107C	.	.	IV:669015-671034	WT	ksp1-KD	OK	66.9064	53.1958	-0.330832	-2.25003	0.0161	0.044582	yes	0.795078	No
YPL227C	YPL227C	YPL227C	.	.	XVI:120162-121167	WT	ksp1-KD	OK	44.3736	35.28	-0.330854	-4.20871	0.0067	0.0214816	yes	0.795066	No
YPR135W	YPR135W	YPR135W	.	.	XVI:799233-802017	WT	ksp1-KD	OK	24.1722	19.2175	-0.330927	-1.60925	0.00665	0.0213529	yes	0.795025	No
YBL023C	YBL023C	YBL023C	.	.	II:174919-177526	WT	ksp1-KD	OK	23.7955	18.9155	-0.331123	-1.74437	0.00575	0.0188924	yes	0.794917	No
YLR166C	YLR166C	YLR166C	.	.	XII:495428-498044	WT	ksp1-KD	OK	40.8189	32.4407	-0.331434	-1.76069	0.00585	0.0192016	yes	0.794746	No
YOR327C	YOR327C	YOR327C	.	.	XV:930733-931081	WT	ksp1-KD	OK	550.252	437.116	-0.332077	-1.98134	0.00645	0.020855	yes	0.794392	No
YBL032W	YBL032W	YBL032W	.	.	II:160183-161329	WT	ksp1-KD	OK	50.6824	40.2549	-0.332321	-1.75726	0.0055	0.0182091	yes	0.794258	No
YHR050W	YHR050W	YHR050W	.	.	VIII:207653-209303	WT	ksp1-KD	OK	46.6478	37.0501	-0.332334	-2.29704	0.00735	0.0232333	yes	0.794251	No
YML105C	YML105C	YML105C	.	.	XIII:57865-58687	WT	ksp1-KD	OK	196.272	155.852	-0.33268	-1.73949	0.00855	0.0262353	yes	0.79406	No
YMR070W	YMR070W	YMR070W	.	.	XIII:409153-410626	WT	ksp1-KD	OK	19.8807	15.7705	-0.334139	-2.35822	0.0049	0.0165343	yes	0.793257	No
YKL144C	YKL144C	YKL144C	.	.	XI:175842-176481	WT	ksp1-KD	OK	99.2082	78.6518	-0.33498	-1.72432	0.007	0.0223663	yes	0.792795	No
YCL047C	YCL047C	YCL047C	.	.	III:43660-44437	WT	ksp1-KD	OK	27.8208	22.056	-0.334993	-1.41557	0.0176	0.0479591	yes	0.792788	No
YPR019W	YPR019W	YPR019W	.	.	XVI:596749-599551	WT	ksp1-KD	OK	24.2922	19.2545	-0.335299	-1.71715	0.00655	0.0211048	yes	0.79262	No
YPR021C	YPR021C	YPR021C	.	.	XVI:600648-603357	WT	ksp1-KD	OK	12.6138	9.99612	-0.335568	-2.25595	0.0064	0.0207243	yes	0.792472	No
YDL219W	YDL219W	YDL219W	.	.	IV:65241-65765	WT	ksp1-KD	OK	89.5438	70.942	-0.335952	-1.50661	0.01305	0.0374777	yes	0.792261	No
YMR281W	YMR281W	YMR281W	.	.	XIII:832338-833253	WT	ksp1-KD	OK	23.986	18.9894	-0.336999	-1.87929	0.0116	0.033852	yes	0.791686	No
YGR156W	YGR156W	YGR156W	.	.	VII:800545-801823	WT	ksp1-KD	OK	33.9578	26.876	-0.337426	-1.89134	0.005	0.016802	yes	0.791452	No
YLR403W	YLR403W	YLR403W	.	.	XII:925567-927619	WT	ksp1-KD	OK	63.1244	49.953	-0.337628	-1.60201	0.00915	0.0277101	yes	0.791341	No
YOR115C	YOR115C	YOR115C	.	.	XV:538658-539465	WT	ksp1-KD	OK	145.624	115.238	-0.337633	-1.71143	0.00535	0.0177668	yes	0.791339	No
YLR272C	YLR272C	YLR272C	.	.	XII:683671-687202	WT	ksp1-KD	OK	14.8719	11.7683	-0.337683	-1.70889	0.00615	0.0200647	yes	0.791311	No
YLR264W	YLR264W	YLR264W	.	.	XII:673130-673334	WT	ksp1-KD	OK	4887.28	3865.13	-0.338516	-2.25066	0.0065	0.0209645	yes	0.790854	No
YPR117W	YPR117W	YPR117W	.	.	XVI:760024-767494	WT	ksp1-KD	OK	11.1581	8.82395	-0.338592	-1.61293	0.00525	0.0175063	yes	0.790813	No
YDR410C	YDR410C	YDR410C	.	.	IV:1292371-1293091	WT	ksp1-KD	OK	42.5592	33.6463	-0.339021	-1.56022	0.01235	0.035704	yes	0.790578	No
YGL207W	YGL207W	YGL207W	.	.	VII:98968-102076	WT	ksp1-KD	OK	53.4035	42.1875	-0.340119	-1.63597	0.01375	0.039142	yes	0.789976	No
YLR333C	YLR333C	YLR333C	.	.	XII:795572-795899	WT	ksp1-KD	OK	1674.04	1322.3	-0.340277	-1.60976	0.01345	0.0384565	yes	0.78989	No
YOR107W	YOR107W	YOR107W	.	.	XV:521352-522282	WT	ksp1-KD	OK	64.136	50.6385	-0.340899	-1.86732	0.005	0.016802	yes	0.789549	No
YIR027C	YIR027C	YIR027C	.	.	IX:406259-407642	WT	ksp1-KD	OK	62.7608	49.5526	-0.340905	-1.70527	0.00525	0.0175063	yes	0.789546	No
YNL308C	YNL308C	YNL308C	.	.	XIV:54121-55897	WT	ksp1-KD	OK	148.905	117.522	-0.341458	-1.50539	0.01515	0.0423483	yes	0.789243	No
YPL139C	YPL139C	YPL139C	.	.	XVI:289668-291051	WT	ksp1-KD	OK	66.9346	52.8115	-0.341899	-1.72059	0.0044	0.0151219	yes	0.789002	No
YOR079C	YOR079C	YOR079C	.	.	XV:473474-474416	WT	ksp1-KD	OK	54.7306	43.1816	-0.341931	-1.58921	0.0056	0.0184743	yes	0.788985	No
YIL151C	YIL151C	YIL151C	.	.	IX:57337-60694	WT	ksp1-KD	OK	18.4645	14.5547	-0.343266	-1.81211	0.00435	0.0149818	yes	0.788255	No
YGL176C	YGL176C	YGL176C	.	.	VII:171414-173079	WT	ksp1-KD	OK	19.1208	15.07	-0.343463	-1.49355	0.0089	0.0271173	yes	0.788147	No
YBL010C	YBL010C	YBL010C	.	.	II:206106-206949	WT	ksp1-KD	OK	54.1043	42.6268	-0.343985	-1.60323	0.01	0.029853	yes	0.787862	No
YHR158C	YHR158C	YHR158C	.	.	VIII:413684-417179	WT	ksp1-KD	OK	22.5093	17.73	-0.344331	-1.63016	0.0056	0.0184743	yes	0.787673	No
YER146W	YER146W	YER146W	.	.	V:462385-462866	WT	ksp1-KD	OK	510.09	401.771	-0.344379	-2.61719	0.0131	0.0376046	yes	0.787647	No
YPL115C	YPL115C	YPL115C	.	.	XVI:332099-335486	WT	ksp1-KD	OK	22.3878	17.63	-0.34468	-1.77282	0.00505	0.016935	yes	0.787483	No
YHR023W	YHR023W	YHR023W	.	.	VIII:151665-157452	WT	ksp1-KD	OK	14.4349	11.364	-0.345086	-1.66836	0.00445	0.0152374	yes	0.787261	No
YMR072W	YMR072W	YMR072W	.	.	XIII:411568-412120	WT	ksp1-KD	OK	579.994	456.532	-0.345321	-1.4977	0.01545	0.0431312	yes	0.787133	No
YCR093W	YCR093W	YCR093W	.	.	III:280116-286443	WT	ksp1-KD	OK	30.7375	24.192	-0.345469	-1.4181	0.0134	0.0383304	yes	0.787052	No
YOR352W	YOR352W	YOR352W	.	.	XV:997212-998244	WT	ksp1-KD	OK	31.5033	24.7899	-0.345747	-1.55808	0.0076	0.0238841	yes	0.7869	No
YBL035C	YBL035C	YBL035C	.	.	II:151492-153610	WT	ksp1-KD	OK	12.0836	9.49787	-0.347377	-1.70304	0.00815	0.0252343	yes	0.786012	No
YDR310C	YDR310C	YDR310C	.	.	IV:1081127-1084316	WT	ksp1-KD	OK	37.5144	29.4375	-0.349791	-1.60331	0.00825	0.0254832	yes	0.784698	No
YBR073W	YBR073W	YBR073W	.	.	II:383111-385988	WT	ksp1-KD	OK	10.293	8.07666	-0.349827	-1.62622	0.00665	0.0213529	yes	0.784678	No
YGL071W	YGL071W	YGL071W	.	.	VII:372011-374084	WT	ksp1-KD	OK	18.3652	14.4017	-0.350737	-1.74469	0.00365	0.0128641	yes	0.784183	No
YNL272C	YNL272C	YNL272C	.	.	XIV:126804-129084	WT	ksp1-KD	OK	22.983	18.0195	-0.351007	-1.78427	0.0041	0.014196	yes	0.784037	No
YMR166C	YMR166C	YMR166C	.	.	XIII:593366-594473	WT	ksp1-KD	OK	15.6941	12.2995	-0.351623	-1.41008	0.0167	0.0458527	yes	0.783702	No
YNL262W	YNL262W	YNL262W	.	.	XIV:148211-154880	WT	ksp1-KD	OK	18.2105	14.2514	-0.353672	-1.62594	0.00535	0.0177668	yes	0.78259	No
YBR177C	YBR177C	YBR177C	.	.	II:584806-586445	WT	ksp1-KD	OK	116.007	90.528	-0.357781	-1.52347	0.0089	0.0271173	yes	0.780364	No
YBR265W	YBR265W	YBR265W	.	.	II:738581-739544	WT	ksp1-KD	OK	191.174	149.131	-0.358306	-1.54861	0.0072	0.0228816	yes	0.78008	No
YNL132W	YNL132W	YNL132W	.	.	XIV:375320-378491	WT	ksp1-KD	OK	45.6307	35.576	-0.359101	-1.58532	0.00715	0.0227784	yes	0.77965	No
YIL026C	YIL026C	YIL026C	.	.	IX:304476-307929	WT	ksp1-KD	OK	26.3628	20.5447	-0.359739	-2.00794	0.003	0.010874	yes	0.779306	No
YHL030W	YHL030W	YHL030W	.	.	VIII:40083-45690	WT	ksp1-KD	OK	32.3571	25.21	-0.360091	-1.4961	0.0125	0.0360735	yes	0.779115	No
YIL062C	YIL062C	YIL062C	.	.	IX:243997-244462	WT	ksp1-KD	OK	849.554	661.748	-0.360424	-1.85868	0.0062	0.0201974	yes	0.778936	No
YER120W	YER120W	YER120W	.	.	V:400866-401869	WT	ksp1-KD	OK	306.218	238.347	-0.361498	-1.67576	0.017	0.046578	yes	0.778356	No
YKL140W	YKL140W	YKL140W	.	.	XI:180778-182425	WT	ksp1-KD	OK	76.7859	59.7637	-0.361572	-1.81505	0.00605	0.0197881	yes	0.778316	No
YGL012W	YGL012W	YGL012W	.	.	VII:472854-474276	WT	ksp1-KD	OK	169.707	132.017	-0.362328	-1.87354	0.01195	0.034671	yes	0.777908	No
YOL084W	YOL084W	YOL084W	.	.	XV:162355-165331	WT	ksp1-KD	OK	42.1561	32.7567	-0.363951	-1.57649	0.00595	0.0195003	yes	0.777034	No
YGL242C	YGL242C	YGL242C	.	.	VII:44651-45197	WT	ksp1-KD	OK	176.707	137.291	-0.364123	-1.86237	0.0034	0.0121077	yes	0.776941	No
YIL016W	YIL016W	YIL016W	.	.	IX:321453-321933	WT	ksp1-KD	OK	212.825	165.24	-0.365099	-2.34963	0.005	0.016802	yes	0.776416	No
YLR418C	YLR418C	YLR418C	.	.	XII:956913-958095	WT	ksp1-KD	OK	102.226	79.3549	-0.365368	-1.92712	0.00185	0.0072385	yes	0.776271	No
YJL138C	YJL138C	YJL138C	.	.	X:153503-154691	WT	ksp1-KD	OK	16.6823	12.9347	-0.367077	-2.10725	0.00915	0.0277101	yes	0.775352	No
YDL226C	YDL226C	YDL226C	.	.	IV:51114-52173	WT	ksp1-KD	OK	146.344	113.392	-0.368051	-2.32215	0.0038	0.0133421	yes	0.774829	No
YKL105C	YKL105C	YKL105C	.	.	XI:239184-242583	WT	ksp1-KD	OK	11.6944	9.05952	-0.368308	-2.13196	0.00185	0.0072385	yes	0.774691	No
YCL034W	YCL034W	YCL034W	.	.	III:61657-62722	WT	ksp1-KD	OK	175.662	136.07	-0.368449	-1.78161	0.0066	0.0212449	yes	0.774615	No
YGL097W	YGL097W	YGL097W	.	.	VII:321781-323230	WT	ksp1-KD	OK	87.5659	67.7753	-0.369609	-1.72938	0.0043	0.0148332	yes	0.773992	No
YLR154C	YLR154C	YLR154C	.	.	XII:447981-448314	WT	ksp1-KD	OK	215.455	166.733	-0.369845	-1.78948	0.01405	0.0398564	yes	0.773866	No
YOR321W	YOR321W	YOR321W	.	.	XV:916029-918291	WT	ksp1-KD	OK	17.1099	13.2287	-0.371162	-1.87624	0.00185	0.0072385	yes	0.77316	No
YPR141C	YPR141C	YPR141C	.	.	XVI:815733-817923	WT	ksp1-KD	OK	25.7028	19.8497	-0.372807	-2.12858	0.00455	0.0155063	yes	0.772278	No
YPR051W	YPR051W	YPR051W	.	.	XVI:664952-665490	WT	ksp1-KD	OK	452.701	349.587	-0.372906	-2.75155	0.00255	0.00953536	yes	0.772225	No
YHR041C	YHR041C	YHR041C	.	.	VIII:189130-189864	WT	ksp1-KD	OK	81.8746	63.2098	-0.373267	-1.80612	0.002	0.00776	yes	0.772032	No
YBR198C	YBR198C	YBR198C	.	.	II:616126-618523	WT	ksp1-KD	OK	45.4763	35.109	-0.373275	-1.85854	0.0023	0.00871078	yes	0.772028	No
YOR243C	YOR243C	YOR243C	.	.	XV:790210-792241	WT	ksp1-KD	OK	114.642	88.5065	-0.373284	-1.75224	0.00535	0.0177668	yes	0.772023	No
YKL108W	YKL108W	YKL108W	.	.	XI:234425-235787	WT	ksp1-KD	OK	17.4585	13.4779	-0.373331	-1.51346	0.0138	0.0392157	yes	0.771998	No
YHR154W	YHR154W	YHR154W	.	.	VIII:402965-406178	WT	ksp1-KD	OK	9.33407	7.20525	-0.373456	-2.34796	0.00385	0.0134885	yes	0.771931	No
YNL039W	YNL039W	YNL039W	.	.	XIV:555047-556832	WT	ksp1-KD	OK	34.9769	26.9934	-0.373797	-2.32033	0.0022	0.00839565	yes	0.771749	No
YBR275C	YBR275C	YBR275C	.	.	II:751355-757106	WT	ksp1-KD	OK	16.519	12.7418	-0.374555	-1.78212	0.0033	0.0117969	yes	0.771343	No
YDR072C	YDR072C	YDR072C	.	.	IV:589760-591344	WT	ksp1-KD	OK	66.8009	51.5254	-0.374585	-1.77827	0.00435	0.0149818	yes	0.771327	No
YDL208W	YDL208W	YDL208W	.	.	IV:87511-87982	WT	ksp1-KD	OK	572.252	441.344	-0.374748	-2.01184	0.0059	0.0193559	yes	0.77124	No
YGL241W	YGL241W	YGL241W	.	.	VII:45444-48459	WT	ksp1-KD	OK	28.1858	21.7126	-0.376436	-1.83895	0.0018	0.00708123	yes	0.770338	No
YDR280W	YDR280W	YDR280W	.	.	IV:1020746-1021664	WT	ksp1-KD	OK	85.987	66.2118	-0.377031	-1.81976	0.0015	0.00608141	yes	0.770021	No
YNL275W	YNL275W	YNL275W	.	.	XIV:119267-120998	WT	ksp1-KD	OK	23.8074	18.3139	-0.37847	-1.72121	0.00395	0.0137942	yes	0.769253	No
YNL082W	YNL082W	YNL082W	.	.	XIV:473390-476012	WT	ksp1-KD	OK	16.0985	12.38	-0.378921	-1.95123	0.00205	0.00790211	yes	0.769013	No
YDL052C	YDL052C	YDL052C	.	.	IV:362671-363583	WT	ksp1-KD	OK	115.132	88.5271	-0.379102	-2.0015	0.00175	0.00690543	yes	0.768916	No
YOL076W	YOL076W	YOL076W	.	.	XV:187023-189414	WT	ksp1-KD	OK	23.5901	18.1364	-0.379289	-1.86695	0.00115	0.00485315	yes	0.768816	No
YOR260W	YOR260W	YOR260W	.	.	XV:813983-815720	WT	ksp1-KD	OK	69.2204	53.1901	-0.38004	-1.85127	0.00455	0.0155063	yes	0.768416	No
YOL116W	YOL116W	YOL116W	.	.	XV:99808-100957	WT	ksp1-KD	OK	35.4202	27.2118	-0.380341	-1.81719	0.00275	0.0100859	yes	0.768256	No
YHR099W	YHR099W	YHR099W	.	.	VIII:302760-313995	WT	ksp1-KD	OK	12.0623	9.26509	-0.380625	-1.66978	0.00385	0.0134885	yes	0.768105	No
YMR031C	YMR031C	YMR031C	.	.	XIII:332211-335035	WT	ksp1-KD	OK	136.95	105.156	-0.381118	-1.68877	0.0135	0.0385147	yes	0.767842	No
YFR037C	YFR037C	YFR037C	.	.	VI:227450-229186	WT	ksp1-KD	OK	102.411	78.603	-0.381715	-1.62371	0.0064	0.0207243	yes	0.767525	No
YML021C	YML021C	YML021C	.	.	XIII:229733-230813	WT	ksp1-KD	OK	35.0806	26.9199	-0.382001	-1.85792	0.0085	0.0261189	yes	0.767373	No
YDR087C	YDR087C	YDR087C	.	.	IV:617469-618306	WT	ksp1-KD	OK	197.125	151.259	-0.38209	-2.25111	0.0011	0.0046603	yes	0.767325	No
YOL130W	YOL130W	YOL130W	.	.	XV:74399-76979	WT	ksp1-KD	OK	67.8892	52.0928	-0.3821	-1.67929	0.0047	0.0159589	yes	0.76732	No
YER098W	YER098W	YER098W	.	.	V:355139-357730	WT	ksp1-KD	OK	16.6918	12.806	-0.382317	-1.7943	0.0029	0.0105586	yes	0.767204	No
YCL050C	YCL050C	YCL050C	.	.	III:37835-38801	WT	ksp1-KD	OK	259.734	199.256	-0.38241	-1.81148	0.0084	0.0258483	yes	0.767155	No
YDR207C	YDR207C	YDR207C	.	.	IV:865011-867522	WT	ksp1-KD	OK	10.9606	8.40475	-0.383055	-2.03914	0.00205	0.00790211	yes	0.766812	No
YFR031C	YFR031C	YFR031C	.	.	VI:216593-220106	WT	ksp1-KD	OK	30.1004	23.0753	-0.383436	-2.35824	0.00125	0.00521757	yes	0.76661	No
YNL152W	YNL152W	YNL152W	.	.	XIV:346312-347542	WT	ksp1-KD	OK	29.7793	22.8212	-0.383931	-4.54494	0.0016	0.0064267	yes	0.766347	No
YAL028W	YAL028W	YAL028W	.	.	I:92899-94486	WT	ksp1-KD	OK	7.00858	5.3707	-0.384012	-1.55389	0.0097	0.0290107	yes	0.766304	No
YMR261C	YMR261C	YMR261C	.	.	XIII:790204-793369	WT	ksp1-KD	OK	46.9406	35.9659	-0.384206	-1.84245	0.0023	0.00871078	yes	0.766201	No
YDR086C	YDR086C	YDR086C	.	.	IV:616927-617170	WT	ksp1-KD	OK	3412.53	2613.89	-0.384643	-3.17695	0.00175	0.00690543	yes	0.765969	No
YER031C	YER031C	YER031C	.	.	V:214075-214747	WT	ksp1-KD	OK	264.869	202.844	-0.384907	-2.3232	0.0026	0.00967778	yes	0.765828	No
YBR066C	YBR066C	YBR066C	.	.	II:370036-370699	WT	ksp1-KD	OK	136.094	104.222	-0.384941	-2.07364	0.0021	0.00808046	yes	0.76581	No
YHR089C	YHR089C	YHR089C	.	.	VIII:282680-283298	WT	ksp1-KD	OK	437.536	335.047	-0.385036	-2.00486	0.0046	0.0156684	yes	0.76576	No
YMR229C	YMR229C	YMR229C	.	.	XIII:725933-731123	WT	ksp1-KD	OK	55.8612	42.772	-0.385178	-1.55387	0.0109	0.032185	yes	0.765685	No
YOR368W	YOR368W	YOR368W	.	.	XV:1026842-1028048	WT	ksp1-KD	OK	72.1967	55.2643	-0.385585	-2.26533	0.00165	0.00659493	yes	0.765469	No
YIL144W	YIL144W	YIL144W	.	.	IX:78073-80149	WT	ksp1-KD	OK	34.9609	26.7169	-0.38799	-1.91677	0.0009	0.00392031	yes	0.764194	No
YLR301W	YLR301W	YLR301W	.	.	XII:730824-731559	WT	ksp1-KD	OK	202.934	155.038	-0.38839	-1.75872	0.00305	0.0110306	yes	0.763982	No
YIL126W	YIL126W	YIL126W	.	.	IX:117991-122071	WT	ksp1-KD	OK	45.6563	34.8543	-0.389479	-1.90733	0.00265	0.00978543	yes	0.763405	No
YDR093W	YDR093W	YDR093W	.	.	IV:631281-636527	WT	ksp1-KD	OK	10.9835	8.38215	-0.389949	-1.90341	0.00155	0.00624516	yes	0.763157	No
YML048W	YML048W	YML048W	.	.	XIII:178425-179637	WT	ksp1-KD	OK	375.919	286.873	-0.390006	-1.40563	0.01495	0.0418974	yes	0.763126	No
YDR356W	YDR356W	YDR356W	.	.	IV:1186066-1188941	WT	ksp1-KD	OK	40.8876	31.1984	-0.390193	-2.84091	0.00095	0.00409691	yes	0.763028	No
YOR133W	YOR133W	YOR133W	.	.	XV:575097-577626	WT	ksp1-KD	OK	24.0574	18.3442	-0.391163	-1.95901	0.0015	0.00608141	yes	0.762515	No
YJL176C	YJL176C	YJL176C	.	.	X:92052-94561	WT	ksp1-KD	OK	37.3071	28.4413	-0.391461	-1.76429	0.0027	0.00994181	yes	0.762357	No
YLR034C	YLR034C	YLR034C	.	.	XII:210511-211933	WT	ksp1-KD	OK	85.4447	65.1386	-0.391479	-1.92863	0.00245	0.00919847	yes	0.762348	No
YOR084W	YOR084W	YOR084W	.	.	XV:480586-481750	WT	ksp1-KD	OK	42.3795	32.3009	-0.391791	-1.87399	0.00135	0.00555998	yes	0.762183	No
YPL057C	YPL057C	YPL057C	.	.	XVI:451908-453057	WT	ksp1-KD	OK	328.237	250.087	-0.392308	-1.48161	0.0102	0.0303803	yes	0.76191	No
YHR127W	YHR127W	YHR127W	.	.	VIII:360912-361644	WT	ksp1-KD	OK	67.707	51.5718	-0.392724	-1.84715	0.00195	0.00759775	yes	0.76169	No
YDR238C	YDR238C	YDR238C	.	.	IV:937894-940816	WT	ksp1-KD	OK	79.007	60.1724	-0.392878	-1.55371	0.0076	0.0238841	yes	0.761609	No
YML069W	YML069W	YML069W	.	.	XIII:135499-137158	WT	ksp1-KD	OK	71.1281	54.1618	-0.393143	-1.78477	0.0032	0.0114899	yes	0.761469	No
YPL218W	YPL218W	YPL218W	.	.	XVI:138697-139409	WT	ksp1-KD	OK	1345.26	1024.11	-0.393512	-2.55913	0.01025	0.0305152	yes	0.761274	No
YHR178W	YHR178W	YHR178W	.	.	VIII:459298-461530	WT	ksp1-KD	OK	12.1731	9.26677	-0.39356	-1.76662	0.0026	0.00967778	yes	0.761249	No
YNL047C	YNL047C	YNL047C	.	.	XIV:539910-541881	WT	ksp1-KD	OK	28.1572	21.4296	-0.393901	-1.93334	0.00095	0.00409691	yes	0.761069	No
YLR386W	YLR386W	YLR386W	.	.	XII:893627-896270	WT	ksp1-KD	OK	19.2562	14.6414	-0.395273	-1.9711	0.00095	0.00409691	yes	0.760345	No
YOL121C	YOL121C	YOL121C	.	.	XV:92025-92850	WT	ksp1-KD	OK	2105.98	1600.68	-0.395807	-2.23812	0.01165	0.033937	yes	0.760064	No
YJR015W	YJR015W	YJR015W	.	.	X:462720-464253	WT	ksp1-KD	OK	75.5408	57.3907	-0.396439	-1.7935	0.00215	0.00823871	yes	0.759731	No
YCL061C	YCL061C	YCL061C	.	.	III:18815-22106	WT	ksp1-KD	OK	13.6194	10.3442	-0.396836	-1.96557	0.0017	0.00674088	yes	0.759522	No
YNL312W	YNL312W	YNL312W	.	.	XIV:48286-49216	WT	ksp1-KD	OK	147.618	112.112	-0.396922	-1.88352	0.00095	0.00409691	yes	0.759477	No
YPL246C	YPL246C	YPL246C	.	.	XVI:84508-85297	WT	ksp1-KD	OK	184.938	140.45	-0.396988	-1.73959	0.0022	0.00839566	yes	0.759442	No
YKL220C	YKL220C	YKL220C	.	.	XI:9090-11226	WT	ksp1-KD	OK	10.42	7.91184	-0.397272	-1.62793	0.00545	0.0180712	yes	0.759293	No
YAL032C	YAL032C	YAL032C	.	.	I:83334-84474	WT	ksp1-KD	OK	24.539	18.6287	-0.397547	-1.74615	0.003	0.010874	yes	0.759148	No
YBR202W	YBR202W	YBR202W	.	.	II:625771-628309	WT	ksp1-KD	OK	55.7887	42.339	-0.397984	-1.97075	0.003	0.010874	yes	0.758918	No
YDL136W	YDL136W	YDL136W	.	.	IV:217599-218367	WT	ksp1-KD	OK	379.329	287.869	-0.398037	-1.91471	0.00105	0.0044806	yes	0.75889	No
YPR072W	YPR072W	YPR072W	.	.	XVI:690106-691789	WT	ksp1-KD	OK	71.5859	54.3178	-0.398251	-1.97197	0.0016	0.0064267	yes	0.758778	No
YPR154W	YPR154W	YPR154W	.	.	XVI:834564-835212	WT	ksp1-KD	OK	121.475	92.1239	-0.39901	-2.40932	0.00115	0.00485315	yes	0.758379	No
YDR022C	YDR022C	YDR022C	.	.	IV:488071-488662	WT	ksp1-KD	OK	184.072	139.502	-0.39998	-1.96361	0.0009	0.00392031	yes	0.757869	No
YPL242C	YPL242C	YPL242C	.	.	XVI:90621-95109	WT	ksp1-KD	OK	24.0717	18.2336	-0.40074	-1.84611	0.00135	0.00555998	yes	0.75747	No
YIL041W	YIL041W	YIL041W	.	.	IX:276524-277505	WT	ksp1-KD	OK	328.192	248.545	-0.401033	-1.71019	0.01125	0.0329787	yes	0.757316	No
YPR163C	YPR163C	YPR163C	.	.	XVI:868644-869955	WT	ksp1-KD	OK	449.701	340.509	-0.401272	-1.40932	0.0179	0.0486542	yes	0.75719	No
YCL014W	YCL014W	YCL014W	.	.	III:96280-101191	WT	ksp1-KD	OK	9.26816	7.01456	-0.401931	-1.94818	0.0009	0.00392031	yes	0.756845	No
YGL006W	YGL006W	YGL006W	.	.	VII:485920-489442	WT	ksp1-KD	OK	101.562	76.8366	-0.402502	-1.83807	0.0092	0.0277838	yes	0.756545	No
YDL095W	YDL095W	YDL095W	.	.	IV:286997-289512	WT	ksp1-KD	OK	60.2671	45.5906	-0.402633	-1.76556	0.00345	0.0122522	yes	0.756476	No
YKL081W	YKL081W	YKL081W	.	.	XI:282890-284455	WT	ksp1-KD	OK	394.758	298.525	-0.403118	-1.38118	0.01635	0.0451396	yes	0.756222	No
YDR091C	YDR091C	YDR091C	.	.	IV:626707-628534	WT	ksp1-KD	OK	152.936	115.651	-0.403144	-1.59387	0.0064	0.0207243	yes	0.756209	No
YKL189W	YKL189W	YKL189W	.	.	XI:84703-85903	WT	ksp1-KD	OK	44.6386	33.7431	-0.403701	-1.85104	0.00165	0.00659493	yes	0.755917	No
YKR082W	YKR082W	YKR082W	.	.	XI:592824-596298	WT	ksp1-KD	OK	38.1433	28.8259	-0.404063	-1.84824	0.00185	0.0072385	yes	0.755727	No
YLR126C	YLR126C	YLR126C	.	.	XII:394764-395520	WT	ksp1-KD	OK	224.646	169.727	-0.404435	-1.80638	0.00185	0.0072385	yes	0.755532	No
YER059W	YER059W	YER059W	.	.	V:272623-273886	WT	ksp1-KD	OK	77.7713	58.7502	-0.404643	-1.8992	0.00095	0.00409691	yes	0.755423	No
YOL015W	YOL015W	YOL015W	.	.	XV:297077-298838	WT	ksp1-KD	OK	8.36051	6.3145	-0.404922	-1.53549	0.0089	0.0271173	yes	0.755277	No
YPL256C	YPL256C	YPL256C	.	.	XVI:64976-66614	WT	ksp1-KD	OK	30.8176	23.2316	-0.407665	-2.84514	0.00075	0.00336852	yes	0.753842	No
YHL040C	YHL040C	YHL040C	.	.	VIII:19087-20971	WT	ksp1-KD	OK	44.3034	33.3972	-0.407689	-2.32492	0.00095	0.00409691	yes	0.75383	No
YOR095C	YOR095C	YOR095C	.	.	XV:503551-504328	WT	ksp1-KD	OK	215.366	162.342	-0.407751	-3.41481	0.00065	0.00297909	yes	0.753798	No
YNL222W	YNL222W	YNL222W	.	.	XIV:229093-229714	WT	ksp1-KD	OK	49.574	37.3574	-0.408189	-1.62844	0.0048	0.016256	yes	0.753569	No
YEL061C	YEL061C	YEL061C	.	.	V:36534-39537	WT	ksp1-KD	OK	27.4555	20.6867	-0.408396	-2.15577	0.00065	0.00297909	yes	0.753461	No
YOR298W	YOR298W	YOR298W	.	.	XV:875598-877038	WT	ksp1-KD	OK	11.5154	8.67592	-0.408475	-1.55535	0.00765	0.024018	yes	0.753419	No
YPL217C	YPL217C	YPL217C	.	.	XVI:139619-143171	WT	ksp1-KD	OK	84.4403	63.5796	-0.409367	-1.67639	0.00805	0.0249723	yes	0.752954	No
YBL004W	YBL004W	YBL004W	.	.	II:227635-235117	WT	ksp1-KD	OK	25.4441	19.1505	-0.409944	-1.68274	0.0039	0.0136416	yes	0.752653	No
YIL149C	YIL149C	YIL149C	.	.	IX:63027-68067	WT	ksp1-KD	OK	21.5097	16.1796	-0.410811	-2.22638	0.00065	0.00297909	yes	0.7522	No
YJL193W	YJL193W	YJL193W	.	.	X:71365-72574	WT	ksp1-KD	OK	29.4475	22.1485	-0.410941	-2.18543	0.0011	0.0046603	yes	0.752133	No
YOL103W	YOL103W	YOL103W	.	.	XV:124000-125830	WT	ksp1-KD	OK	53.9385	40.5452	-0.411783	-2.01048	0.001	0.00430113	yes	0.751694	No
YDR195W	YDR195W	YDR195W	.	.	IV:848598-850200	WT	ksp1-KD	OK	35.0231	26.2834	-0.414155	-2.00327	0.0006	0.0027833	yes	0.750459	No
YBR108W	YBR108W	YBR108W	.	.	II:454821-457665	WT	ksp1-KD	OK	17.6425	13.2107	-0.417348	-2.17616	0.00055	0.00257711	yes	0.7488	No
YGR122W	YGR122W	YGR122W	.	.	VII:733934-735143	WT	ksp1-KD	OK	84.3867	63.1829	-0.41748	-2.3863	0.0008	0.00354894	yes	0.748731	No
YOR274W	YOR274W	YOR274W	.	.	XV:837673-838960	WT	ksp1-KD	OK	165.8	123.964	-0.419519	-2.99725	0.0003	0.00149174	yes	0.747674	No
YDL236W	YDL236W	YDL236W	.	.	IV:32295-33234	WT	ksp1-KD	OK	692.246	517.41	-0.419976	-1.49721	0.01085	0.0320665	yes	0.747437	No
YPL253C	YPL253C	YPL253C	.	.	XVI:71062-73006	WT	ksp1-KD	OK	13.648	10.1982	-0.420371	-2.0577	0.002	0.00776	yes	0.747232	No
YBL087C	YBL087C	YBL087C	.	.	II:59821-60739	WT	ksp1-KD	OK	1237.63	924.383	-0.421018	-2.30111	0.00635	0.0206446	yes	0.746897	No
YOR389W	YOR389W	YOR389W	.	.	XV:1074212-1076087	WT	ksp1-KD	OK	19.1803	14.3229	-0.421303	-1.91748	0.00065	0.00297909	yes	0.74675	No
YPL155C	YPL155C	YPL155C	.	.	XVI:257215-259336	WT	ksp1-KD	OK	22.2004	16.5682	-0.422172	-2.09709	0.0003	0.00149174	yes	0.7463	No
YGL094C	YGL094C	YGL094C	.	.	VII:331117-334465	WT	ksp1-KD	OK	33.4881	24.9894	-0.422333	-1.94751	0.0008	0.00354894	yes	0.746217	No
YMR143W	YMR143W	YMR143W	.	.	XIII:551927-552903	WT	ksp1-KD	OK	2152.44	1606.15	-0.42237	-1.43189	0.0155	0.0432151	yes	0.746198	No
YNL031C	YNL031C	YNL031C	.	.	XIV:575639-576050	WT	ksp1-KD	OK	4021.83	2999.28	-0.423237	-1.46086	0.0155	0.0432151	yes	0.745749	No
YBR052C	YBR052C	YBR052C	.	.	II:338719-339352	WT	ksp1-KD	OK	425.928	317.52	-0.423765	-1.98378	0.0013	0.0053882	yes	0.745477	No
YAR050W	YAR050W	YAR050W	.	.	I:203402-208016	WT	ksp1-KD	OK	2.41231	1.79728	-0.424597	-2.18177	0.00455	0.0155063	yes	0.745047	No
YPR114W	YPR114W	YPR114W	.	.	XVI:753300-754248	WT	ksp1-KD	OK	42.6123	31.746	-0.424695	-2.14219	0.0006	0.0027833	yes	0.744996	No
YPL203W	YPL203W	YPL203W	.	.	XVI:166255-167398	WT	ksp1-KD	OK	108.842	81.0723	-0.42496	-2.04787	0.00045	0.00216794	yes	0.744859	No
YDR176W	YDR176W	YDR176W	.	.	IV:814451-816560	WT	ksp1-KD	OK	32.3277	24.0788	-0.425008	-2.04391	0.0005	0.00238233	yes	0.744835	No
YKR043C	YKR043C	YKR043C	.	.	XI:520896-521712	WT	ksp1-KD	OK	386.916	288.171	-0.425096	-1.76375	0.00415	0.0143615	yes	0.744789	No
YDL146W	YDL146W	YDL146W	.	.	IV:192749-194225	WT	ksp1-KD	OK	26.489	19.725	-0.425367	-1.89423	0.00085	0.00373758	yes	0.744649	No
YBR070C	YBR070C	YBR070C	.	.	II:379220-379934	WT	ksp1-KD	OK	50.3974	37.5112	-0.426027	-1.87068	0.0013	0.0053882	yes	0.744309	No
YIL045W	YIL045W	YIL045W	.	.	IX:271160-272777	WT	ksp1-KD	OK	87.4082	65.0568	-0.426069	-1.99143	0.00055	0.00257711	yes	0.744287	No
YCR030C	YCR030C	YCR030C	.	.	III:173825-176438	WT	ksp1-KD	OK	30.0206	22.3347	-0.426667	-2.47165	0.0005	0.00238233	yes	0.743979	No
YML060W	YML060W	YML060W	.	.	XIII:151870-153001	WT	ksp1-KD	OK	44.8716	33.35	-0.428115	-2.31002	0.0012	0.00503148	yes	0.743232	No
YGL137W	YGL137W	YGL137W	.	.	VII:249868-252738	WT	ksp1-KD	OK	77.6617	57.7134	-0.428297	-1.87073	0.00315	0.0113355	yes	0.743138	No
YDL081C	YDL081C	YDL081C	.	.	IV:309801-310122	WT	ksp1-KD	OK	2997.78	2227.69	-0.428349	-1.55049	0.00765	0.024018	yes	0.743112	No
YER032W	YER032W	YER032W	.	.	V:215062-217693	WT	ksp1-KD	OK	19.2998	14.3333	-0.429212	-2.0871	0.0007	0.00317245	yes	0.742667	No
YKL101W	YKL101W	YKL101W	.	.	XI:248919-253476	WT	ksp1-KD	OK	15.9442	11.8348	-0.429994	-2.5276	0.00075	0.00336852	yes	0.742265	No
YPL267W	YPL267W	YPL267W	.	.	XVI:38168-38798	WT	ksp1-KD	OK	129.987	96.3886	-0.431433	-2.30257	0.0012	0.00503148	yes	0.741525	No
YOL145C	YOL145C	YOL145C	.	.	XV:49554-52788	WT	ksp1-KD	OK	84.4094	62.5651	-0.432044	-2.02818	0.002	0.00776	yes	0.741211	No
YNL225C	YNL225C	YNL225C	.	.	XIV:222723-224469	WT	ksp1-KD	OK	28.446	21.0839	-0.432085	-2.04016	0.0003	0.00149174	yes	0.74119	No
YGL061C	YGL061C	YGL061C	.	.	VII:388967-389711	WT	ksp1-KD	OK	63.3504	46.8294	-0.435939	-1.99288	0.0011	0.0046603	yes	0.739212	No
YPL263C	YPL263C	YPL263C	.	.	XVI:44550-46506	WT	ksp1-KD	OK	25.3111	18.6967	-0.436986	-2.0898	0.0005	0.00238233	yes	0.738676	No
YMR260C	YMR260C	YMR260C	.	.	XIII:789377-789839	WT	ksp1-KD	OK	2010.73	1484.57	-0.437673	-2.79296	0.00165	0.00659493	yes	0.738325	No
YHL034C	YHL034C	YHL034C	.	.	VIII:33175-34077	WT	ksp1-KD	OK	476.976	351.883	-0.43882	-1.74989	0.00955	0.0286016	yes	0.737738	No
YGR116W	YGR116W	YGR116W	.	.	VII:720264-724764	WT	ksp1-KD	OK	59.0903	43.5926	-0.438838	-1.78695	0.0026	0.00967778	yes	0.737729	No
YLR094C	YLR094C	YLR094C	.	.	XII:327729-329238	WT	ksp1-KD	OK	38.0265	28.0515	-0.438929	-2.45554	0.0004	0.00194581	yes	0.737682	No
YAL023C	YAL023C	YAL023C	.	.	I:106271-108551	WT	ksp1-KD	OK	63.2322	46.6442	-0.438962	-1.91306	0.0017	0.00674088	yes	0.737665	No
YGR210C	YGR210C	YGR210C	.	.	VII:913502-914738	WT	ksp1-KD	OK	187.994	138.615	-0.439601	-1.92144	0.00105	0.0044806	yes	0.737339	No
YNR052C	YNR052C	YNR052C	.	.	XIV:719345-720647	WT	ksp1-KD	OK	64.2653	47.3582	-0.440425	-5.07206	0.0005	0.00238233	yes	0.736917	No
YDR385W	YDR385W	YDR385W	.	.	IV:1243229-1245758	WT	ksp1-KD	OK	104.692	77.1353	-0.440691	-1.72346	0.0049	0.0165343	yes	0.736782	No
YOL004W	YOL004W	YOL004W	.	.	XV:316937-321548	WT	ksp1-KD	OK	19.4286	14.3146	-0.440701	-2.25023	0.00055	0.00257711	yes	0.736777	No
YDL047W	YDL047W	YDL047W	.	.	IV:369770-370706	WT	ksp1-KD	OK	197.909	145.784	-0.441007	-1.92041	0.0008	0.00354894	yes	0.73662	No
YML072C	YML072C	YML072C	.	.	XIII:124729-129367	WT	ksp1-KD	OK	52.7204	38.8215	-0.441508	-1.7693	0.0028	0.0102462	yes	0.736365	No
YJL165C	YJL165C	YJL165C	.	.	X:106893-109461	WT	ksp1-KD	OK	62.9438	46.3317	-0.442066	-2.17899	0.00195	0.00759775	yes	0.73608	No
YDR263C	YDR263C	YDR263C	.	.	IV:994241-995534	WT	ksp1-KD	OK	21.8474	16.0796	-0.442233	-1.75265	0.00315	0.0113355	yes	0.735995	No
YJR118C	YJR118C	YJR118C	.	.	X:643489-644101	WT	ksp1-KD	OK	109.921	80.8692	-0.442804	-2.98011	0.00035	0.00171801	yes	0.735703	No
YER183C	YER183C	YER183C	.	.	V:553333-553969	WT	ksp1-KD	OK	140.609	103.439	-0.442904	-2.11995	0.0002	0.00103818	yes	0.735652	No
YGL070C	YGL070C	YGL070C	.	.	VII:374458-374827	WT	ksp1-KD	OK	140.876	103.55	-0.444097	-1.95306	0.0015	0.00608141	yes	0.735044	No
YMR087W	YMR087W	YMR087W	.	.	XIII:442526-443381	WT	ksp1-KD	OK	56.8834	41.7886	-0.444897	-2.06959	0.00075	0.00336852	yes	0.734637	No
YNL309W	YNL309W	YNL309W	.	.	XIV:52661-53924	WT	ksp1-KD	OK	13.3786	9.81959	-0.446192	-2.34235	0.00085	0.00373758	yes	0.733978	No
YAL035W	YAL035W	YAL035W	.	.	I:76426-79435	WT	ksp1-KD	OK	165.562	121.503	-0.446376	-1.73873	0.0079	0.0245774	yes	0.733884	No
YDR447C	YDR447C	YDR447C	.	.	IV:1354828-1355553	WT	ksp1-KD	OK	1749.22	1283.45	-0.446688	-1.67466	0.00455	0.0155063	yes	0.733725	No
YBR189W	YBR189W	YBR189W	.	.	II:604507-605508	WT	ksp1-KD	OK	1451.62	1065.08	-0.446704	-1.78951	0.0165	0.0454379	yes	0.733717	No
YOR340C	YOR340C	YOR340C	.	.	XV:959201-960182	WT	ksp1-KD	OK	151.478	111.08	-0.447517	-2.44258	0.0002	0.00103818	yes	0.733304	No
YOR326W	YOR326W	YOR326W	.	.	XV:925720-930445	WT	ksp1-KD	OK	75.4231	55.2898	-0.447994	-1.73711	0.00265	0.00978543	yes	0.733061	No
YOR190W	YOR190W	YOR190W	.	.	XV:690694-692032	WT	ksp1-KD	OK	18.0936	13.2619	-0.448185	-4.11039	0.00075	0.00336852	yes	0.732964	No
YER124C	YER124C	YER124C	.	.	V:407341-409063	WT	ksp1-KD	OK	162.399	119.028	-0.448245	-1.65409	0.00465	0.0158139	yes	0.732934	No
YCL028W	YCL028W	YCL028W	.	.	III:70149-71367	WT	ksp1-KD	OK	162.858	119.321	-0.448759	-1.92672	0.0015	0.00608141	yes	0.732673	No
YLR256W	YLR256W	YLR256W	.	.	XII:646414-650923	WT	ksp1-KD	OK	106.113	77.7293	-0.449073	-1.49934	0.00885	0.0270029	yes	0.732513	No
YNR014W	YNR014W	YNR014W	.	.	XIV:652464-653103	WT	ksp1-KD	OK	13.4825	9.85986	-0.451446	-1.7661	0.00365	0.0128641	yes	0.731309	No
YPL032C	YPL032C	YPL032C	.	.	XVI:488886-491364	WT	ksp1-KD	OK	46.2822	33.8341	-0.451979	-2.69853	0.00075	0.00336852	yes	0.731039	No
YML109W	YML109W	YML109W	.	.	XIII:51639-54468	WT	ksp1-KD	OK	9.43136	6.8898	-0.453004	-2.32223	0.00025	0.00126538	yes	0.73052	No
YDL161W	YDL161W	YDL161W	.	.	IV:167358-169078	WT	ksp1-KD	OK	64.2645	46.911	-0.454095	-2.15732	0.00025	0.00126538	yes	0.729968	No
YKL104C	YKL104C	YKL104C	.	.	XI:243219-245373	WT	ksp1-KD	OK	155.2	113.278	-0.454257	-1.99896	0.0013	0.0053882	yes	0.729886	No
YHR107C	YHR107C	YHR107C	.	.	VIII:326812-328036	WT	ksp1-KD	OK	146.371	106.825	-0.45438	-1.98982	0.00055	0.00257711	yes	0.729824	No
YCR088W	YCR088W	YCR088W	.	.	III:265067-266846	WT	ksp1-KD	OK	93.2641	68.0569	-0.454581	-2.00412	0.0025	0.00936455	yes	0.729722	No
YOR143C	YOR143C	YOR143C	.	.	XV:601382-602342	WT	ksp1-KD	OK	76.3233	55.6749	-0.455097	-2.49955	5e-05	0.000294606	yes	0.729461	No
YER130C	YER130C	YER130C	.	.	V:421114-422446	WT	ksp1-KD	OK	172.186	125.597	-0.455167	-1.85609	0.00325	0.0116373	yes	0.729426	No
YGR177C	YGR177C	YGR177C	.	.	VII:848719-850436	WT	ksp1-KD	OK	10.0247	7.31087	-0.455439	-1.7419	0.0033	0.0117969	yes	0.729288	No
YNL287W	YNL287W	YNL287W	.	.	XIV:91993-94801	WT	ksp1-KD	OK	81.0552	59.0925	-0.455928	-1.8517	0.00225	0.00854632	yes	0.729041	No
YER043C	YER043C	YER043C	.	.	V:235769-237119	WT	ksp1-KD	OK	1042.19	759.67	-0.456176	-1.52465	0.0144	0.0406364	yes	0.728916	No
YJR005W	YJR005W	YJR005W	.	.	X:445922-448025	WT	ksp1-KD	OK	88.9221	64.7909	-0.45675	-2.23824	0.00035	0.00171801	yes	0.728626	No
YOR372C	YOR372C	YOR372C	.	.	XV:1034806-1036471	WT	ksp1-KD	OK	20.6939	15.0769	-0.456866	-2.72835	0.00015	0.000804996	yes	0.728567	No
YJR009C	YJR009C	YJR009C	.	.	X:453682-454681	WT	ksp1-KD	OK	2876.85	2095.05	-0.457508	-1.64128	0.0176	0.0479591	yes	0.728243	No
YPL037C	YPL037C	YPL037C	.	.	XVI:481427-481901	WT	ksp1-KD	OK	1386.9	1009.97	-0.457557	-1.88868	0.0034	0.0121077	yes	0.728218	No
YPR183W	YPR183W	YPR183W	.	.	XVI:900754-901558	WT	ksp1-KD	OK	137.495	99.9931	-0.45948	-2.15051	0.00025	0.00126538	yes	0.727248	No
YEL007W	YEL007W	YEL007W	.	.	V:141891-143892	WT	ksp1-KD	OK	118.768	86.3714	-0.459523	-2.62689	0.00305	0.0110306	yes	0.727227	No
YBR041W	YBR041W	YBR041W	.	.	II:318265-320275	WT	ksp1-KD	OK	62.9751	45.7344	-0.461502	-2.1167	0.0004	0.00194581	yes	0.72623	No
YPL082C	YPL082C	YPL082C	.	.	XVI:398479-404083	WT	ksp1-KD	OK	15.5154	11.2662	-0.461694	-2.24682	0.0001	0.000557854	yes	0.726133	No
YKR010C	YKR010C	YKR010C	.	.	XI:458923-461239	WT	ksp1-KD	OK	10.8027	7.83715	-0.462991	-2.15511	0.0005	0.00238233	yes	0.725481	No
YOR197W	YOR197W	YOR197W	.	.	XV:717085-718384	WT	ksp1-KD	OK	173.21	125.641	-0.463213	-2.12977	0.00175	0.00690543	yes	0.725369	No
YBR054W	YBR054W	YBR054W	.	.	II:343100-344135	WT	ksp1-KD	OK	559.235	405.22	-0.46475	-2.10835	0.0076	0.0238841	yes	0.724597	No
YOR110W	YOR110W	YOR110W	.	.	XV:528940-530248	WT	ksp1-KD	OK	47.4162	34.3557	-0.464832	-2.3117	0.0002	0.00103818	yes	0.724555	No
YER112W	YER112W	YER112W	.	.	V:387231-387795	WT	ksp1-KD	OK	371.279	268.974	-0.465041	-2.40597	0.00015	0.000804996	yes	0.72445	No
YLR340W	YLR340W	YLR340W	.	.	XII:805783-806825	WT	ksp1-KD	OK	1481.89	1073.18	-0.465547	-1.69362	0.01475	0.04148	yes	0.724196	No
YLR228C	YLR228C	YLR228C	.	.	XII:600018-602463	WT	ksp1-KD	OK	20.0565	14.5206	-0.46597	-2.45888	0.0001	0.000557854	yes	0.723984	No
YER056C-A	YER056C-A	YER056C-A	.	.	V:269422-270185	WT	ksp1-KD	OK	1466.93	1061.66	-0.466481	-2.03788	0.0022	0.00839566	yes	0.723728	No
YIL069C	YIL069C	YIL069C	.	.	IX:231552-232369	WT	ksp1-KD	OK	886.993	641.778	-0.466848	-1.98861	0.00105	0.0044806	yes	0.723544	No
YGL195W	YGL195W	YGL195W	.	.	VII:131524-139543	WT	ksp1-KD	OK	20.401	14.7589	-0.46705	-2.02265	0.00075	0.00336852	yes	0.723442	No
YPL131W	YPL131W	YPL131W	.	.	XVI:303120-304014	WT	ksp1-KD	OK	2032.99	1470.5	-0.467294	-1.81016	0.01815	0.0492307	yes	0.72332	No
YLR150W	YLR150W	YLR150W	.	.	XII:440466-441288	WT	ksp1-KD	OK	2015.5	1456.62	-0.468519	-1.62282	0.01195	0.034671	yes	0.722706	No
YHR211W	YHR211W	YHR211W	.	.	VIII:525391-528619	WT	ksp1-KD	OK	7.29229	5.26637	-0.469561	-2.38026	0.00025	0.00126538	yes	0.722184	No
YNL087W	YNL087W	YNL087W	.	.	XIV:462410-465947	WT	ksp1-KD	OK	48.6872	35.16	-0.469608	-2.08124	0.0007	0.00317245	yes	0.722161	No
YBR243C	YBR243C	YBR243C	.	.	II:705446-706793	WT	ksp1-KD	OK	38.9375	28.1164	-0.469749	-2.39415	0.0001	0.000557854	yes	0.72209	No
YNL193W	YNL193W	YNL193W	.	.	XIV:274367-276044	WT	ksp1-KD	OK	16.6186	11.9995	-0.469825	-3.03794	0.0002	0.00103818	yes	0.722052	No
YLR100W	YLR100W	YLR100W	.	.	XII:341809-342961	WT	ksp1-KD	OK	336.346	242.776	-0.470319	-1.39172	0.01825	0.0494195	yes	0.721805	No
YLR218C	YLR218C	YLR218C	.	.	XII:573465-573918	WT	ksp1-KD	OK	29.8862	21.55	-0.471791	-1.96694	0.0053	0.0176549	yes	0.721069	No
YOR025W	YOR025W	YOR025W	.	.	XV:378218-379562	WT	ksp1-KD	OK	23.6124	17.0255	-0.471843	-3.37274	0.00035	0.00171801	yes	0.721043	No
YBR163W	YBR163W	YBR163W	.	.	II:565722-567480	WT	ksp1-KD	OK	43.0819	31.0594	-0.472053	-2.31645	0.0001	0.000557854	yes	0.720938	No
YDR300C	YDR300C	YDR300C	.	.	IV:1061504-1062791	WT	ksp1-KD	OK	62.3823	44.9517	-0.472761	-2.34885	5e-05	0.000294606	yes	0.720584	No
YKR042W	YKR042W	YKR042W	.	.	XI:519526-520624	WT	ksp1-KD	OK	462.519	333.238	-0.472958	-1.79368	0.00895	0.0271931	yes	0.720486	No
YNR075W	YNR075W	YNR075W	.	.	XIV:779915-781040	WT	ksp1-KD	OK	14.8052	10.6604	-0.473834	-1.95585	0.00235	0.00887945	yes	0.720049	No
YJL097W	YJL097W	YJL097W	.	.	X:245590-246244	WT	ksp1-KD	OK	110.088	79.1724	-0.475584	-2.34294	0.00015	0.000804996	yes	0.719176	No
YPR132W	YPR132W	YPR132W	.	.	XVI:794964-795767	WT	ksp1-KD	OK	2164.85	1555.45	-0.476938	-1.78488	0.0065	0.0209645	yes	0.718501	No
YGL105W	YGL105W	YGL105W	.	.	VII:307436-308567	WT	ksp1-KD	OK	567.347	407.575	-0.477166	-1.66359	0.00455	0.0155063	yes	0.718387	No
YLR137W	YLR137W	YLR137W	.	.	XII:417005-418109	WT	ksp1-KD	OK	26.5032	19.0358	-0.477451	-2.21497	0.0009	0.00392031	yes	0.718246	No
YLR048W	YLR048W	YLR048W	.	.	XII:242231-243349	WT	ksp1-KD	OK	1472.46	1057.52	-0.47754	-1.51825	0.01005	0.0299885	yes	0.718201	No
YHR171W	YHR171W	YHR171W	.	.	VIII:445712-447605	WT	ksp1-KD	OK	23.09	16.5759	-0.478184	-2.23678	0.0002	0.00103818	yes	0.717881	No
YNR009W	YNR009W	YNR009W	.	.	XIV:642689-643439	WT	ksp1-KD	OK	32.0782	23.0095	-0.479364	-1.9772	0.0016	0.0064267	yes	0.717294	No
YER060W	YER060W	YER060W	.	.	V:274566-276153	WT	ksp1-KD	OK	26.8121	19.2321	-0.479366	-2.94619	0.0002	0.00103818	yes	0.717293	No
YOL109W	YOL109W	YOL109W	.	.	XV:110296-110638	WT	ksp1-KD	OK	4915.27	3524.68	-0.479777	-2.24953	0.0052	0.0173752	yes	0.717088	No
YDR096W	YDR096W	YDR096W	.	.	IV:637138-639823	WT	ksp1-KD	OK	28.2747	20.2647	-0.480543	-2.30153	0.0001	0.000557854	yes	0.716708	No
YNL327W	YNL327W	YNL327W	.	.	XIV:24047-27173	WT	ksp1-KD	OK	70.2517	50.3394	-0.480845	-3.1673	0.0042	0.0145113	yes	0.716558	No
YOR018W	YOR018W	YOR018W	.	.	XV:364368-366882	WT	ksp1-KD	OK	14.7295	10.5522	-0.481169	-2.30924	5e-05	0.000294606	yes	0.716397	No
YDL101C	YDL101C	YDL101C	.	.	IV:280306-281848	WT	ksp1-KD	OK	29.0388	20.7911	-0.482018	-2.33721	0.00015	0.000804996	yes	0.715975	No
YLL026W	YLL026W	YLL026W	.	.	XII:88622-91349	WT	ksp1-KD	OK	985.434	705.45	-0.482215	-1.60029	0.01405	0.0398564	yes	0.715878	No
YBR283C	YBR283C	YBR283C	.	.	II:768942-770415	WT	ksp1-KD	OK	217.496	155.694	-0.482274	-1.85994	0.0012	0.00503148	yes	0.715848	No
YOR033C	YOR033C	YOR033C	.	.	XV:392415-394524	WT	ksp1-KD	OK	29.0652	20.8054	-0.482335	-2.8669	0.0002	0.00103818	yes	0.715818	No
YLR006C	YLR006C	YLR006C	.	.	XII:161754-163893	WT	ksp1-KD	OK	53.4326	38.2384	-0.482699	-2.367	0.0002	0.00103818	yes	0.715638	No
YLR176C	YLR176C	YLR176C	.	.	XII:507796-510232	WT	ksp1-KD	OK	6.25297	4.47363	-0.483096	-2.50203	0.00105	0.0044806	yes	0.715441	No
YNL010W	YNL010W	YNL010W	.	.	XIV:613634-614360	WT	ksp1-KD	OK	648.089	463.319	-0.484185	-1.9261	0.00155	0.00624516	yes	0.714901	No
YGR175C	YGR175C	YGR175C	.	.	VII:846932-848423	WT	ksp1-KD	OK	1337.73	956.206	-0.484397	-1.60984	0.01195	0.034671	yes	0.714796	No
YNL178W	YNL178W	YNL178W	.	.	XIV:302679-303402	WT	ksp1-KD	OK	3726.32	2662.19	-0.485139	-1.82641	0.01075	0.0318143	yes	0.714428	No
YNL166C	YNL166C	YNL166C	.	.	XIV:322218-323565	WT	ksp1-KD	OK	39.378	28.123	-0.485639	-8.50677	0.0002	0.00103818	yes	0.714181	No
YGL201C	YGL201C	YGL201C	.	.	VII:117853-120907	WT	ksp1-KD	OK	44.2799	31.5975	-0.486839	-2.22872	0.0002	0.00103818	yes	0.713587	No
YER111C	YER111C	YER111C	.	.	V:382594-385876	WT	ksp1-KD	OK	9.75005	6.95186	-0.48801	-2.33459	0.00015	0.000804996	yes	0.713008	No
YOR038C	YOR038C	YOR038C	.	.	XV:402760-405388	WT	ksp1-KD	OK	26.9131	19.1865	-0.488217	-2.35601	5e-05	0.000294606	yes	0.712906	No
YHR103W	YHR103W	YHR103W	.	.	VIII:320413-322972	WT	ksp1-KD	OK	32.5919	23.2291	-0.488582	-2.34549	0.0001	0.000557854	yes	0.712725	No
YDR033W	YDR033W	YDR033W	.	.	IV:508146-509109	WT	ksp1-KD	OK	1159.1	825.446	-0.48976	-2.0166	0.012	0.0348005	yes	0.712144	No
YOL005C	YOL005C	YOL005C	.	.	XV:315812-316175	WT	ksp1-KD	OK	223.116	158.873	-0.489921	-3.41569	5e-05	0.000294606	yes	0.712064	No
YDR224C	YDR224C	YDR224C	.	.	IV:914316-914712	WT	ksp1-KD	OK	5218.17	3715.48	-0.489996	-1.68686	0.0068	0.0217808	yes	0.712027	No
YAL021C	YAL021C	YAL021C	.	.	I:110845-113359	WT	ksp1-KD	OK	94.9179	67.5745	-0.490202	-1.9191	0.0012	0.00503148	yes	0.711925	No
YJL216C	YJL216C	YJL216C	.	.	X:24340-26086	WT	ksp1-KD	OK	23.2049	16.5176	-0.490425	-2.19747	0.0001	0.000557854	yes	0.711815	No
YDR097C	YDR097C	YDR097C	.	.	IV:640108-643837	WT	ksp1-KD	OK	22.1916	15.7953	-0.490521	-2.39603	0.0001	0.000557854	yes	0.711768	No
YPR106W	YPR106W	YPR106W	.	.	XVI:740060-741392	WT	ksp1-KD	OK	53.4621	38.0456	-0.490788	-2.53503	0.0001	0.000557854	yes	0.711636	No
YIR023W	YIR023W	YIR023W	.	.	IX:399776-402706	WT	ksp1-KD	OK	24.0821	17.137	-0.490849	-2.41123	0.0003	0.00149174	yes	0.711606	No
YKR094C	YKR094C	YKR094C	.	.	XI:617995-618750	WT	ksp1-KD	OK	2097.42	1490.76	-0.492565	-1.84038	0.00235	0.00887945	yes	0.71076	No
YBL085W	YBL085W	YBL085W	.	.	II:63875-66818	WT	ksp1-KD	OK	15.9061	11.2866	-0.494969	-2.93659	5e-05	0.000294606	yes	0.709577	No
YDL159W	YDL159W	YDL159W	.	.	IV:172480-174174	WT	ksp1-KD	OK	31.6977	22.4554	-0.497317	-2.12336	0.00055	0.00257711	yes	0.708423	No
YOR026W	YOR026W	YOR026W	.	.	XV:379780-380806	WT	ksp1-KD	OK	66.0689	46.7676	-0.498462	-2.36033	5e-05	0.000294606	yes	0.707861	No
YLR029C	YLR029C	YLR029C	.	.	XII:201975-202590	WT	ksp1-KD	OK	5805.16	4104.06	-0.500286	-2.07173	0.0079	0.0245774	yes	0.706967	No
YDL084W	YDL084W	YDL084W	.	.	IV:305236-306577	WT	ksp1-KD	OK	532.809	376.653	-0.500384	-1.9786	0.002	0.00776	yes	0.706919	No
YPL156C	YPL156C	YPL156C	.	.	XVI:255912-256767	WT	ksp1-KD	OK	30.4453	21.5127	-0.501028	-2.08451	0.00025	0.00126538	yes	0.706603	No
YHR108W	YHR108W	YHR108W	.	.	VIII:328302-330060	WT	ksp1-KD	OK	134.236	94.834	-0.5013	-2.04563	0.00105	0.0044806	yes	0.70647	No
YBR284W	YBR284W	YBR284W	.	.	II:771238-773632	WT	ksp1-KD	OK	8.42085	5.94496	-0.502298	-1.9879	0.0008	0.00354894	yes	0.705981	No
YBL027W	YBL027W	YBL027W	.	.	II:168422-169376	WT	ksp1-KD	OK	2659.34	1874.01	-0.50494	-2.26439	0.00775	0.0242267	yes	0.70469	No
YFL052W	YFL052W	YFL052W	.	.	VI:28231-29629	WT	ksp1-KD	OK	10.4096	7.3353	-0.504986	-1.836	0.00265	0.00978543	yes	0.704667	No
YCR077C	YCR077C	YCR077C	.	.	III:250237-252628	WT	ksp1-KD	OK	114.488	80.6468	-0.505511	-1.91917	0.00135	0.00555998	yes	0.704411	No
YJR127C	YJR127C	YJR127C	.	.	X:658916-663280	WT	ksp1-KD	OK	15.1898	10.687	-0.507246	-2.49633	5e-05	0.000294606	yes	0.703564	No
YOL113W	YOL113W	YOL113W	.	.	XV:104325-106293	WT	ksp1-KD	OK	46.1248	32.4468	-0.507468	-2.40549	5e-05	0.000294606	yes	0.703456	No
YJL145W	YJL145W	YJL145W	.	.	X:145159-146044	WT	ksp1-KD	OK	216.988	152.616	-0.507712	-2.76494	5e-05	0.000294606	yes	0.703337	No
YML124C	YML124C	YML124C	.	.	XIII:22047-23683	WT	ksp1-KD	OK	130.855	91.9941	-0.508356	-2.30453	0.00015	0.000804996	yes	0.703023	No
YOR181W	YOR181W	YOR181W	.	.	XV:675938-677840	WT	ksp1-KD	OK	17.5132	12.3028	-0.509454	-2.83703	5e-05	0.000294606	yes	0.702488	No
YDR143C	YDR143C	YDR143C	.	.	IV:742041-743874	WT	ksp1-KD	OK	40.0729	28.11	-0.511545	-3.02986	0.0001	0.000557854	yes	0.701471	No
YNL126W	YNL126W	YNL126W	.	.	XIV:387226-389767	WT	ksp1-KD	OK	18.4628	12.9432	-0.512433	-2.37687	0.0001	0.000557854	yes	0.701039	No
[truncated: 5,037 more rows]

## Sheet: isoforms
test_id	ncbi_gene_link	gene_symbol	gene_id	gene_desc	locus	sample_1	sample_2	status	value_1	value_2	log2(fold_change)	test_stat	p_value	q_value	significant	linear_fold_change	diff_exp
tY(GUA)Q_tRNA	tY(GUA)Q	tY(GUA)Q	.	.	Mito:70823-70907	WT	ksp1-KD	OK	0	29.5006	inf		0.00355	0.012573	yes	inf	Yes
tA(UGC)Q_tRNA	tA(UGC)Q	tA(UGC)Q	.	.	Mito:69845-69921	WT	ksp1-KD	OK	0	57.846	inf		0.0003	0.00149174	yes	inf	Yes
YLR307C-A_mRNA	YLR307C-A	YLR307C-A	.	.	XII:746847-747111	WT	ksp1-KD	OK	39.5766	1811.85	5.51667	48.5952	5e-05	0.000294606	yes	45.7808	Yes
YPR036W-A_mRNA	YPR036W-A	YPR036W-A	.	.	XVI:645949-646153	WT	ksp1-KD	OK	95.5572	2239.63	4.55076	37.2106	5e-05	0.000294606	yes	23.4377	Yes
YGL117W_mRNA	YGL117W	YGL117W	.	.	VII:288511-289309	WT	ksp1-KD	OK	25.6832	543.405	4.40313	16.086	5e-05	0.000294606	yes	21.158	Yes
YER175C_mRNA	YER175C	YER175C	.	.	V:539463-540363	WT	ksp1-KD	OK	94.7916	1819.34	4.26251	15.5915	5e-05	0.000294606	yes	19.193	Yes
YPL250C_mRNA	YPL250C	YPL250C	.	.	XVI:74308-74719	WT	ksp1-KD	OK	22.8564	434.127	4.24745	18.5204	5e-05	0.000294606	yes	18.9937	Yes
YPL092W_mRNA	YPL092W	YPL092W	.	.	XVI:373792-375169	WT	ksp1-KD	OK	21.1395	362.745	4.10094	13.9374	5e-05	0.000294606	yes	17.1596	Yes
YBR296C-A_mRNA	YBR296C-A	YBR296C-A	.	.	II:800122-800242	WT	ksp1-KD	OK	8.83661	138.976	3.9752	9.48338	0.00265	0.00978543	yes	15.7273	Yes
YFL014W_mRNA	YFL014W	YFL014W	.	.	VI:107255-107585	WT	ksp1-KD	OK	898.949	13655	3.92505	17.2436	5e-05	0.000294606	yes	15.19	Yes
YPL033C_mRNA	YPL033C	YPL033C	.	.	XVI:487361-488207	WT	ksp1-KD	OK	4.43703	66.4875	3.90542	22.6715	5e-05	0.000294606	yes	14.9847	Yes
YNR069C_mRNA	YNR069C	YNR069C	.	.	XIV:761122-762592	WT	ksp1-KD	OK	23.0236	319.493	3.7946	15.0268	5e-05	0.000294606	yes	13.8768	Yes
YJR095W_mRNA	YJR095W	YJR095W	.	.	X:609772-610741	WT	ksp1-KD	OK	2.80356	36.125	3.68766	10.5561	5e-05	0.000294606	yes	12.8854	Yes
YNR068C_mRNA	YNR068C	YNR068C	.	.	XIV:760066-760885	WT	ksp1-KD	OK	30.6241	369.879	3.59431	17.6411	5e-05	0.000294606	yes	12.078	Yes
YHR071W_mRNA	YHR071W	YHR071W	.	.	VIII:237003-237693	WT	ksp1-KD	OK	114.256	1327.24	3.53809	15.4818	5e-05	0.000294606	yes	11.6164	Yes
YPL251W_mRNA	YPL251W	YPL251W	.	.	XVI:73362-73927	WT	ksp1-KD	OK	20.8898	233.202	3.48071	8.67784	5e-05	0.000294606	yes	11.1634	Yes
YMR107W_mRNA	YMR107W	YMR107W	.	.	XIII:483013-483361	WT	ksp1-KD	OK	234.552	2535.45	3.43426	23.3653	5e-05	0.000294606	yes	10.8097	Yes
YJL088W_mRNA	YJL088W	YJL088W	.	.	X:268798-269815	WT	ksp1-KD	OK	187.095	1965.73	3.39322	12.3447	5e-05	0.000294606	yes	10.5066	Yes
YBR116C_mRNA	YBR116C	YBR116C	.	.	II:474198-476437	WT	ksp1-KD	OK	4.0942	40.6595	3.31194	3.52403	5e-05	0.000294606	yes	9.93101	Yes
YGL184C_mRNA	YGL184C	YGL184C	.	.	VII:154614-156012	WT	ksp1-KD	OK	34.3954	339.42	3.30279	15.3542	5e-05	0.000294606	yes	9.86822	Yes
YPL252C_mRNA	YPL252C	YPL252C	.	.	XVI:73362-73927	WT	ksp1-KD	OK	23.0435	227.09	3.30083	16.6446	5e-05	0.000294606	yes	9.85482	Yes
YJL089W_mRNA	YJL089W	YJL089W	.	.	X:265925-268415	WT	ksp1-KD	OK	2.89483	27.428	3.2441	13.1282	5e-05	0.000294606	yes	9.47483	Yes
YMR096W_mRNA	YMR096W	YMR096W	.	.	XIII:458407-459301	WT	ksp1-KD	OK	143.292	1265.65	3.14285	17.9043	5e-05	0.000294606	yes	8.83267	Yes
YGR043C_mRNA	YGR043C	YGR043C	.	.	VII:580434-581436	WT	ksp1-KD	OK	20.0895	175.865	3.12996	12.2314	5e-05	0.000294606	yes	8.75411	Yes
YBR147W_mRNA	YBR147W	YBR147W	.	.	II:536574-537465	WT	ksp1-KD	OK	113.465	979.651	3.11002	13.9967	5e-05	0.000294606	yes	8.63395	Yes
YJR109C_mRNA	YJR109C	YJR109C	.	.	X:629584-632941	WT	ksp1-KD	OK	85.0324	733.587	3.10888	10.5107	5e-05	0.000294606	yes	8.62713	Yes
YNL104C_mRNA	YNL104C	YNL104C	.	.	XIV:424894-426808	WT	ksp1-KD	OK	72.7481	621.514	3.09481	11.8502	5e-05	0.000294606	yes	8.5434	Yes
YBR068C_mRNA	YBR068C	YBR068C	.	.	II:373860-375690	WT	ksp1-KD	OK	11.7417	99.5981	3.08447	12.4802	5e-05	0.000294606	yes	8.48239	Yes
YDL222C_mRNA	YDL222C	YDL222C	.	.	IV:60871-61801	WT	ksp1-KD	OK	4.72831	40.0213	3.08137	10.7867	5e-05	0.000294606	yes	8.46418	Yes
YOL140W_mRNA	YOL140W	YOL140W	.	.	XV:58758-60030	WT	ksp1-KD	OK	41.1648	344.109	3.06338	54.2655	5e-05	0.000294606	yes	8.35929	Yes
YBR256C_mRNA	YBR256C	YBR256C	.	.	II:727385-728102	WT	ksp1-KD	OK	364.074	3028.67	3.05638	13.5495	5e-05	0.000294606	yes	8.31883	Yes
YDR035W_mRNA	YDR035W	YDR035W	.	.	IV:521815-522928	WT	ksp1-KD	OK	241.6	1855.13	2.94083	11.0722	5e-05	0.000294606	yes	7.67853	Yes
YIR034C_mRNA	YIR034C	YIR034C	.	.	IX:419614-420736	WT	ksp1-KD	OK	82.4729	617.521	2.9045	11.4463	5e-05	0.000294606	yes	7.48758	Yes
YER052C_mRNA	YER052C	YER052C	.	.	V:256374-257958	WT	ksp1-KD	OK	111.207	815.462	2.87437	10.9684	5e-05	0.000294606	yes	7.33283	Yes
YHR018C_mRNA	YHR018C	YHR018C	.	.	VIII:140010-141402	WT	ksp1-KD	OK	1348.76	9701.55	2.84658	9.33466	5e-05	0.000294606	yes	7.19293	Yes
YBR047W_mRNA	YBR047W	YBR047W	.	.	II:331832-332360	WT	ksp1-KD	OK	18.0541	123.987	2.77979	16.53	5e-05	0.000294606	yes	6.86752	Yes
YER065C_mRNA	YER065C	YER065C	.	.	V:285240-286914	WT	ksp1-KD	OK	42.3207	286.678	2.76	9.09976	5e-05	0.000294606	yes	6.77396	Yes
YOL058W_mRNA	YOL058W	YOL058W	.	.	XV:219210-220473	WT	ksp1-KD	OK	654.098	4316.16	2.72217	9.96921	5e-05	0.000294606	yes	6.59865	Yes
YER073W_mRNA	YER073W	YER073W	.	.	V:304029-305592	WT	ksp1-KD	OK	60.5666	394.655	2.704	14.5262	5e-05	0.000294606	yes	6.51606	Yes
YMR095C_mRNA	YMR095C	YMR095C	.	.	XIII:457284-457959	WT	ksp1-KD	OK	11.7368	75.0268	2.67636	44.5764	5e-05	0.000294606	yes	6.39241	Yes
YNR058W_mRNA	YNR058W	YNR058W	.	.	XIV:734290-735733	WT	ksp1-KD	OK	13.3396	84.0148	2.65493	17.0308	5e-05	0.000294606	yes	6.29816	Yes
YDR158W_mRNA	YDR158W	YDR158W	.	.	IV:770356-771454	WT	ksp1-KD	OK	396.114	2480.26	2.6465	9.23611	5e-05	0.000294606	yes	6.26146	Yes
YER085C_mRNA	YER085C	YER085C	.	.	V:327597-328140	WT	ksp1-KD	OK	2.19151	13.3558	2.60747	5.69167	5e-05	0.000294606	yes	6.09434	Yes
YOL052C-A_mRNA	YOL052C-A	YOL052C-A	.	.	XV:231569-231755	WT	ksp1-KD	OK	439.93	2659.5	2.59581	13.9425	5e-05	0.000294606	yes	6.04528	Yes
YBR117C_mRNA	YBR117C	YBR117C	.	.	II:474198-476437	WT	ksp1-KD	OK	9.17866	54.5674	2.57168	7.434	5e-05	0.000294606	yes	5.94501	Yes
YJR130C_mRNA	YJR130C	YJR130C	.	.	X:665217-667137	WT	ksp1-KD	OK	54.5347	322.714	2.56501	10.0656	5e-05	0.000294606	yes	5.91759	Yes
YER174C_mRNA	YER174C	YER174C	.	.	V:538433-539168	WT	ksp1-KD	OK	79.6145	452.943	2.50823	11.675	5e-05	0.000294606	yes	5.68922	Yes
YGL183C_mRNA	YGL183C	YGL183C	.	.	VII:156542-157596	WT	ksp1-KD	OK	7.84505	43.9732	2.48677	12.0136	5e-05	0.000294606	yes	5.60522	Yes
YPL223C_mRNA	YPL223C	YPL223C	.	.	XVI:128631-129138	WT	ksp1-KD	OK	41.9204	234.53	2.48405	9.65898	5e-05	0.000294606	yes	5.59466	Yes
YOR202W_mRNA	YOR202W	YOR202W	.	.	XV:721945-724725	WT	ksp1-KD	OK	752.339	4196.77	2.47983	11.7436	5e-05	0.000294606	yes	5.57832	Yes
YGL182C_mRNA	YGL182C	YGL182C	.	.	VII:156542-157596	WT	ksp1-KD	OK	1.09921	6.0242	2.45431	2.23734	0.0017	0.00674088	yes	5.48051	Yes
YMR062C_mRNA	YMR062C	YMR062C	.	.	XIII:395053-396379	WT	ksp1-KD	OK	172.8	946.875	2.45407	8.92743	5e-05	0.000294606	yes	5.4796	Yes
YOR203W_mRNA	YOR203W	YOR203W	.	.	XV:721945-724725	WT	ksp1-KD	OK	90.8427	494.78	2.44535	1.58812	0.01185	0.0344732	yes	5.44658	Yes
YBR115C_mRNA	YBR115C	YBR115C	.	.	II:469747-473926	WT	ksp1-KD	OK	31.2177	168.218	2.4299	8.97365	5e-05	0.000294606	yes	5.38856	Yes
YCL075W	YCL075W	YCL075W	.	.	III:1391-2566	WT	ksp1-KD	OK	1.55649	8.36842	2.42666	4.78449	5e-05	0.000294606	yes	5.37647	Yes
YGR154C_mRNA	YGR154C	YGR154C	.	.	VII:796797-797868	WT	ksp1-KD	OK	38.2489	203.588	2.41216	12.331	5e-05	0.000294606	yes	5.32271	Yes
YHR096C_mRNA	YHR096C	YHR096C	.	.	VIII:294668-296447	WT	ksp1-KD	OK	30.6411	162.795	2.40952	9.18369	5e-05	0.000294606	yes	5.31298	Yes
YIL046W-A_mRNA	YIL046W-A	YIL046W-A	.	.	IX:268308-268473	WT	ksp1-KD	OK	1.37598	7.28865	2.40519	2.81944	0.01725	0.0471041	yes	5.29705	Yes
YOR121C_mRNA	YOR121C	YOR121C	.	.	XV:551113-552103	WT	ksp1-KD	OK	120.706	637.035	2.39987	16.4173	5e-05	0.000294606	yes	5.27756	Yes
YNL221C_mRNA	YNL221C	YNL221C	.	.	XIV:231067-233695	WT	ksp1-KD	OK	27.5168	143.538	2.38304	9.67054	5e-05	0.000294606	yes	5.21635	Yes
YPR167C_mRNA	YPR167C	YPR167C	.	.	XVI:876846-877632	WT	ksp1-KD	OK	80.1557	417.414	2.3806	14.1273	5e-05	0.000294606	yes	5.20753	Yes
YJR137C_mRNA	YJR137C	YJR137C	.	.	X:678956-683285	WT	ksp1-KD	OK	35.2331	182.083	2.3696	8.72904	5e-05	0.000294606	yes	5.16798	Yes
YHR208W_mRNA	YHR208W	YHR208W	.	.	VIII:517531-518713	WT	ksp1-KD	OK	192.934	986.817	2.35468	7.90741	5e-05	0.000294606	yes	5.11481	Yes
YJR111C_mRNA	YJR111C	YJR111C	.	.	X:635854-636706	WT	ksp1-KD	OK	42.7949	214.83	2.32769	11.9955	5e-05	0.000294606	yes	5.02001	Yes
YOR391C_mRNA	YOR391C	YOR391C	.	.	XV:1078544-1079258	WT	ksp1-KD	OK	1.56293	7.81117	2.32129	6.06007	5e-05	0.000294606	yes	4.99779	Yes
YKL086W_mRNA	YKL086W	YKL086W	.	.	XI:278280-278664	WT	ksp1-KD	OK	6.07277	30.3494	2.32124	6.74894	5e-05	0.000294606	yes	4.99762	Yes
YHR122W_mRNA	YHR122W	YHR122W	.	.	VIII:353624-354320	WT	ksp1-KD	OK	51.7557	257.95	2.3173	10.2433	5e-05	0.000294606	yes	4.98399	Yes
YKL163W_mRNA	YKL163W	YKL163W	.	.	XI:144400-145378	WT	ksp1-KD	OK	21.5197	107.207	2.31667	10.389	5e-05	0.000294606	yes	4.98181	Yes
YER069W_mRNA	YER069W	YER069W	.	.	V:295300-298001	WT	ksp1-KD	OK	212.44	1044.53	2.29773	7.35446	5e-05	0.000294606	yes	4.91684	Yes
YOR222W_mRNA	YOR222W	YOR222W	.	.	XV:758329-759253	WT	ksp1-KD	OK	287.395	1408.35	2.2929	8.11464	5e-05	0.000294606	yes	4.9004	Yes
YLR406C-A_mRNA	YLR406C-A	YLR406C-A	.	.	XII:932205-932355	WT	ksp1-KD	OK	0.569746	2.73733	2.26438	2.35653	0.01835	0.0496076	yes	4.80448	Yes
YOR120W_mRNA	YOR120W	YOR120W	.	.	XV:551113-552103	WT	ksp1-KD	OK	83.1426	398.452	2.26075	7.8102	5e-05	0.000294606	yes	4.79241	Yes
YMR322C_mRNA	YMR322C	YMR322C	.	.	XIII:918365-919079	WT	ksp1-KD	OK	4.48086	21.4292	2.25773	7.89694	5e-05	0.000294606	yes	4.78238	Yes
YBR294W_mRNA	YBR294W	YBR294W	.	.	II:789234-791814	WT	ksp1-KD	OK	10.0517	47.35	2.23593	9.8481	5e-05	0.000294606	yes	4.71066	Yes
YHR033W_mRNA	YHR033W	YHR033W	.	.	VIII:175547-176819	WT	ksp1-KD	OK	1.79252	8.44092	2.23542	7.17829	5e-05	0.000294606	yes	4.709	Yes
YER055C_mRNA	YER055C	YER055C	.	.	V:264891-265785	WT	ksp1-KD	OK	387.079	1820.5	2.23363	8.66899	5e-05	0.000294606	yes	4.70316	Yes
YGL059W_mRNA	YGL059W	YGL059W	.	.	VII:392222-393698	WT	ksp1-KD	OK	43.2284	202.161	2.22545	9.60975	5e-05	0.000294606	yes	4.67657	Yes
YLL055W_mRNA	YLL055W	YLL055W	.	.	XII:30108-31704	WT	ksp1-KD	OK	15.6398	72.8171	2.21905	16.4074	5e-05	0.000294606	yes	4.65587	Yes
YCL030C_mRNA	YCL030C	YCL030C	.	.	III:65933-68333	WT	ksp1-KD	OK	283.062	1317.74	2.21887	7.14127	5e-05	0.000294606	yes	4.65529	Yes
YCL074W	YCL074W	YCL074W	.	.	III:2823-3750	WT	ksp1-KD	OK	1.36562	6.34827	2.21681	6.98083	5e-05	0.000294606	yes	4.64864	Yes
YDL182W_mRNA	YDL182W	YDL182W	.	.	IV:133436-134723	WT	ksp1-KD	OK	49.421	229.422	2.21481	9.55857	5e-05	0.000294606	yes	4.6422	Yes
YDR070C_mRNA	YDR070C	YDR070C	.	.	IV:588097-588379	WT	ksp1-KD	OK	441.125	2047.47	2.21458	10.5353	5e-05	0.000294606	yes	4.64146	Yes
YOR302W_mRNA	YOR302W	YOR302W	.	.	XV:882764-882842	WT	ksp1-KD	OK	17286.2	79572.2	2.20264	18.1981	5e-05	0.000294606	yes	4.60321	Yes
YJR016C_mRNA	YJR016C	YJR016C	.	.	X:464450-466208	WT	ksp1-KD	OK	261.955	1204.87	2.20148	8.57589	5e-05	0.000294606	yes	4.59951	Yes
YDL198C_mRNA	YDL198C	YDL198C	.	.	IV:103648-104551	WT	ksp1-KD	OK	207.586	951.603	2.19665	8.98117	5e-05	0.000294606	yes	4.58414	Yes
YJR094C_mRNA	YJR094C	YJR094C	.	.	X:604568-605651	WT	ksp1-KD	OK	3.77042	17.1657	2.18673	7.87739	5e-05	0.000294606	yes	4.55272	Yes
YOR108W_mRNA	YOR108W	YOR108W	.	.	XV:523026-524841	WT	ksp1-KD	OK	19.0932	86.1401	2.17363	9.16998	5e-05	0.000294606	yes	4.51157	Yes
YAL067C_mRNA	YAL067C	YAL067C	.	.	I:7234-9016	WT	ksp1-KD	OK	4.45953	19.837	2.15323	7.86134	5e-05	0.000294606	yes	4.44823	Yes
YIL116W_mRNA	YIL116W	YIL116W	.	.	IX:142927-144085	WT	ksp1-KD	OK	443.07	1953.16	2.14021	8.20151	5e-05	0.000294606	yes	4.40826	Yes
YIR039C_mRNA	YIR039C	YIR039C	.	.	IX:430497-432111	WT	ksp1-KD	OK	3.1235	13.5932	2.12165	7.59764	5e-05	0.000294606	yes	4.35191	Yes
YLL046C_mRNA	YLL046C	YLL046C	.	.	XII:46671-47463	WT	ksp1-KD	OK	0.610882	2.63238	2.1074	3.99465	5e-05	0.000294606	yes	4.30914	Yes
YMR271C_mRNA	YMR271C	YMR271C	.	.	XIII:806864-807548	WT	ksp1-KD	OK	73.9021	318.328	2.10683	9.65076	5e-05	0.000294606	yes	4.30744	Yes
YBR145W_mRNA	YBR145W	YBR145W	.	.	II:533761-534817	WT	ksp1-KD	OK	67.3426	288.687	2.09991	9.36356	5e-05	0.000294606	yes	4.28683	Yes
YKL218C_mRNA	YKL218C	YKL218C	.	.	XI:17358-18339	WT	ksp1-KD	OK	342.353	1432.5	2.06498	9.07928	5e-05	0.000294606	yes	4.18428	Yes
YJR150C_mRNA	YJR150C	YJR150C	.	.	X:708810-709707	WT	ksp1-KD	OK	0.581322	2.41557	2.05495	6.21869	5e-05	0.000294606	yes	4.15529	Yes
YDL204W_mRNA	YDL204W	YDL204W	.	.	IV:94604-95786	WT	ksp1-KD	OK	20.074	83.2308	2.05179	8.05905	5e-05	0.000294606	yes	4.1462	Yes
YLR174W_mRNA	YLR174W	YLR174W	.	.	XII:504590-505829	WT	ksp1-KD	OK	173.96	719.811	2.04887	11.802	5e-05	0.000294606	yes	4.13782	Yes
YBR249C_mRNA	YBR249C	YBR249C	.	.	II:716881-717994	WT	ksp1-KD	OK	270.457	1116.99	2.04615	7.51532	5e-05	0.000294606	yes	4.13002	Yes
YGR088W_mRNA	YGR088W	YGR088W	.	.	VII:654633-656322	WT	ksp1-KD	OK	56.128	231.136	2.04195	8.2185	5e-05	0.000294606	yes	4.11802	Yes
YGR066C_mRNA	YGR066C	YGR066C	.	.	VII:620920-621799	WT	ksp1-KD	OK	20.4525	84.0854	2.03958	8.37367	5e-05	0.000294606	yes	4.11126	Yes
YKL211C_mRNA	YKL211C	YKL211C	.	.	XI:36698-38153	WT	ksp1-KD	OK	83.5028	338.252	2.0182	7.79964	5e-05	0.000294606	yes	4.05078	Yes
YPR078C_mRNA	YPR078C	YPR078C	.	.	XVI:697130-698265	WT	ksp1-KD	OK	4.1181	16.6508	2.01554	6.43096	5e-05	0.000294606	yes	4.04332	Yes
YOL119C_mRNA	YOL119C	YOL119C	.	.	XV:94855-96361	WT	ksp1-KD	OK	147.152	594.327	2.01395	7.26171	5e-05	0.000294606	yes	4.03887	Yes
YLR152C_mRNA	YLR152C	YLR152C	.	.	XII:442957-444688	WT	ksp1-KD	OK	32.5422	130.127	1.99953	8.44245	5e-05	0.000294606	yes	3.9987	Yes
YKR004C_mRNA	YKR004C	YKR004C	.	.	XI:446798-448036	WT	ksp1-KD	OK	15.0147	59.9383	1.9971	10.53	5e-05	0.000294606	yes	3.99197	Yes
YPL036W_mRNA	YPL036W	YPL036W	.	.	XVI:482842-485686	WT	ksp1-KD	OK	7.55925	30.1226	1.99453	8.55497	5e-05	0.000294606	yes	3.98486	Yes
YOR392W_mRNA	YOR392W	YOR392W	.	.	XV:1079281-1079725	WT	ksp1-KD	OK	2.0779	8.27108	1.99295	4.63556	5e-05	0.000294606	yes	3.9805	Yes
YGL202W_mRNA	YGL202W	YGL202W	.	.	VII:116058-117561	WT	ksp1-KD	OK	456.275	1813.03	1.99042	6.74499	5e-05	0.000294606	yes	3.97353	Yes
YJL071W_mRNA	YJL071W	YJL071W	.	.	X:306131-307856	WT	ksp1-KD	OK	14.6723	58.0328	1.98378	9.41879	5e-05	0.000294606	yes	3.95528	Yes
YJR025C_mRNA	YJR025C	YJR025C	.	.	X:471137-471671	WT	ksp1-KD	OK	214.292	844.067	1.97778	31.8317	5e-05	0.000294606	yes	3.93887	Yes
YGL224C_mRNA	YGL224C	YGL224C	.	.	VII:78014-78857	WT	ksp1-KD	OK	196.681	772.88	1.97438	7.63248	5e-05	0.000294606	yes	3.92959	Yes
snR49_snoRNA	snR49	snR49	.	.	XIV:716119-716284	WT	ksp1-KD	OK	2.39567	9.38308	1.96963	4.99333	0.0038	0.0133421	yes	3.91668	Yes
YMR175W_mRNA	YMR175W	YMR175W	.	.	XIII:611015-611255	WT	ksp1-KD	OK	210.632	821.428	1.96341	7.30592	5e-05	0.000294606	yes	3.89983	Yes
YER090W_mRNA	YER090W	YER090W	.	.	V:337948-339472	WT	ksp1-KD	OK	100.842	392.972	1.96233	7.74163	5e-05	0.000294606	yes	3.89691	Yes
YOR173W_mRNA	YOR173W	YOR173W	.	.	XV:657263-658325	WT	ksp1-KD	OK	31.9876	124.555	1.9612	10.3658	5e-05	0.000294606	yes	3.89386	Yes
YDL085W_mRNA	YDL085W	YDL085W	.	.	IV:303210-304848	WT	ksp1-KD	OK	17.4779	67.9156	1.95821	8.84976	5e-05	0.000294606	yes	3.8858	Yes
YNL019C_mRNA	YNL019C	YNL019C	.	.	XIV:598375-599230	WT	ksp1-KD	OK	0.186124	0.722874	1.95748	3.67068	5e-05	0.000294606	yes	3.88383	Yes
YGR239C_mRNA	YGR239C	YGR239C	.	.	VII:969186-970053	WT	ksp1-KD	OK	60.2137	233.606	1.95591	9.86368	5e-05	0.000294606	yes	3.87961	Yes
YML100W-A_mRNA	YML100W-A	YML100W-A	.	.	XIII:70137-70311	WT	ksp1-KD	OK	1.47129	5.62665	1.93519	1.90839	0.00535	0.0177668	yes	3.82428	Yes
YCL018W_mRNA	YCL018W	YCL018W	.	.	III:91323-92418	WT	ksp1-KD	OK	109.489	417.149	1.92978	7.51278	5e-05	0.000294606	yes	3.80997	Yes
YDL054C_mRNA	YDL054C	YDL054C	.	.	IV:359824-361285	WT	ksp1-KD	OK	47.7018	180.848	1.92267	9.59532	5e-05	0.000294606	yes	3.79124	Yes
YBR248C_mRNA	YBR248C	YBR248C	.	.	II:714806-716465	WT	ksp1-KD	OK	130.75	491.11	1.90924	8.31833	5e-05	0.000294606	yes	3.75611	Yes
YOR108C-A_mRNA	YOR108C-A	YOR108C-A	.	.	XV:523026-524841	WT	ksp1-KD	OK	114.374	426.451	1.89862	2.5956	0.0002	0.00103818	yes	3.72856	Yes
YOR337W_mRNA	YOR337W	YOR337W	.	.	XV:954343-956623	WT	ksp1-KD	OK	35.5002	131.577	1.89001	13.2541	5e-05	0.000294606	yes	3.70638	Yes
YIL160C_mRNA	YIL160C	YIL160C	.	.	IX:40190-41444	WT	ksp1-KD	OK	30.5509	112.906	1.88584	9.11857	5e-05	0.000294606	yes	3.69568	Yes
YLR303W_mRNA	YLR303W	YLR303W	.	.	XII:732190-733876	WT	ksp1-KD	OK	368.097	1357.5	1.88279	6.23206	5e-05	0.000294606	yes	3.68788	Yes
YDR274C_mRNA	YDR274C	YDR274C	.	.	IV:1011588-1011960	WT	ksp1-KD	OK	8.76495	31.9273	1.86497	7.48297	5e-05	0.000294606	yes	3.6426	Yes
YGR065C_mRNA	YGR065C	YGR065C	.	.	VII:618076-619858	WT	ksp1-KD	OK	28.578	103.871	1.86181	7.39702	5e-05	0.000294606	yes	3.63463	Yes
YPL021W_mRNA	YPL021W	YPL021W	.	.	XVI:511100-511664	WT	ksp1-KD	OK	0.0961263	0.349107	1.86067	2.12861	0.00175	0.00690543	yes	3.63176	Yes
YNL270C_mRNA	YNL270C	YNL270C	.	.	XIV:135939-137661	WT	ksp1-KD	OK	0.682792	2.46868	1.85422	5.06234	5e-05	0.000294606	yes	3.61556	Yes
YOR130C_mRNA	YOR130C	YOR130C	.	.	XV:569928-570807	WT	ksp1-KD	OK	76.4112	275.934	1.85247	11.691	5e-05	0.000294606	yes	3.61118	Yes
YDR453C_mRNA	YDR453C	YDR453C	.	.	IV:1365071-1365662	WT	ksp1-KD	OK	54.4614	194.219	1.83438	8.60993	5e-05	0.000294606	yes	3.56618	Yes
YML128C_mRNA	YML128C	YML128C	.	.	XIII:15134-16676	WT	ksp1-KD	OK	111.198	393.939	1.82484	6.77542	5e-05	0.000294606	yes	3.54268	Yes
YKR080W_mRNA	YKR080W	YKR080W	.	.	XI:590394-591357	WT	ksp1-KD	OK	40.5668	143.674	1.82443	10.1485	5e-05	0.000294606	yes	3.54167	Yes
YPR007C_mRNA	YPR007C	YPR007C	.	.	XVI:569335-571378	WT	ksp1-KD	OK	1.13237	3.98397	1.81485	4.97537	5e-05	0.000294606	yes	3.51823	Yes
YCR005C_mRNA	YCR005C	YCR005C	.	.	III:120945-122328	WT	ksp1-KD	OK	90.6045	316.631	1.80515	7.95628	5e-05	0.000294606	yes	3.49465	Yes
YNR057C_mRNA	YNR057C	YNR057C	.	.	XIV:733355-734069	WT	ksp1-KD	OK	20.7691	72.521	1.80396	8.30798	5e-05	0.000294606	yes	3.49177	Yes
YGR256W_mRNA	YGR256W	YGR256W	.	.	VII:1004623-1006102	WT	ksp1-KD	OK	22.2891	76.7241	1.78334	7.47687	5e-05	0.000294606	yes	3.44222	Yes
YBR104W_mRNA	YBR104W	YBR104W	.	.	II:449666-450656	WT	ksp1-KD	OK	64.0046	219.387	1.77723	8.29256	5e-05	0.000294606	yes	3.42767	Yes
YPR145W_mRNA	YPR145W	YPR145W	.	.	XVI:822619-824338	WT	ksp1-KD	OK	67.6773	229.379	1.76099	7.06	5e-05	0.000294606	yes	3.38931	Yes
YKL120W_mRNA	YKL120W	YKL120W	.	.	XI:217343-218318	WT	ksp1-KD	OK	70.8764	238.929	1.7532	7.40835	5e-05	0.000294606	yes	3.37105	Yes
YPL264C_mRNA	YPL264C	YPL264C	.	.	XVI:43282-44344	WT	ksp1-KD	OK	19.945	66.886	1.74568	8.68236	5e-05	0.000294606	yes	3.35353	Yes
YDR014W-A_mRNA	YDR014W-A	YDR014W-A	.	.	IV:477796-478285	WT	ksp1-KD	OK	1.40441	4.70273	1.74354	2.39319	0.0004	0.00194581	yes	3.34856	Yes
YIL117C_mRNA	YIL117C	YIL117C	.	.	IX:140612-141569	WT	ksp1-KD	OK	3.52472	11.769	1.73941	11.1446	5e-05	0.000294606	yes	3.33899	Yes
YGL026C_mRNA	YGL026C	YGL026C	.	.	VII:446411-448535	WT	ksp1-KD	OK	157.358	521.838	1.72955	6.08939	5e-05	0.000294606	yes	3.31624	Yes
YFL030W_mRNA	YFL030W	YFL030W	.	.	VI:76830-77988	WT	ksp1-KD	OK	77.1951	254.623	1.72178	8.50049	5e-05	0.000294606	yes	3.29843	Yes
YJL200C_mRNA	YJL200C	YJL200C	.	.	X:56443-58813	WT	ksp1-KD	OK	81.2304	266.998	1.71674	7.08926	5e-05	0.000294606	yes	3.28693	Yes
YBR169C_mRNA	YBR169C	YBR169C	.	.	II:573914-575996	WT	ksp1-KD	OK	33.5534	110.125	1.71461	7.52939	5e-05	0.000294606	yes	3.28208	Yes
YOL064C_mRNA	YOL064C	YOL064C	.	.	XV:206102-207176	WT	ksp1-KD	OK	149.709	490.547	1.71223	6.83233	5e-05	0.000294606	yes	3.27667	Yes
YLR013W_mRNA	YLR013W	YLR013W	.	.	XII:171338-171764	WT	ksp1-KD	OK	0.316323	1.03203	1.70601	2.19026	0.00045	0.00216794	yes	3.26257	Yes
YNL179C_mRNA	YNL179C	YNL179C	.	.	XIV:300665-301103	WT	ksp1-KD	OK	7.28887	23.7077	1.70159	10.8157	5e-05	0.000294606	yes	3.25259	Yes
YOR100C_mRNA	YOR100C	YOR100C	.	.	XV:513294-514278	WT	ksp1-KD	OK	7.2314	23.498	1.70019	6.21937	5e-05	0.000294606	yes	3.24944	Yes
YDL066W_mRNA	YDL066W	YDL066W	.	.	IV:334834-336121	WT	ksp1-KD	OK	169.948	550.234	1.69496	6.60366	5e-05	0.000294606	yes	3.23768	Yes
snR55_snoRNA	snR55	snR55	.	.	XII:794696-794794	WT	ksp1-KD	OK	67.4973	216.403	1.68082	3.12161	5e-05	0.000294606	yes	3.2061	Yes
YOL163W_mRNA	YOL163W	YOL163W	.	.	XV:9596-10106	WT	ksp1-KD	OK	41.5409	133.156	1.68051	7.47348	5e-05	0.000294606	yes	3.20541	Yes
YKL162C-A_mRNA	YKL162C-A	YKL162C-A	.	.	XI:145921-146074	WT	ksp1-KD	OK	100.616	319.741	1.66804	4.64224	5e-05	0.000294606	yes	3.17783	Yes
YGL205W_mRNA	YGL205W	YGL205W	.	.	VII:108157-110404	WT	ksp1-KD	OK	11.8663	37.6836	1.66707	7.619	5e-05	0.000294606	yes	3.17569	Yes
YDR127W_mRNA	YDR127W	YDR127W	.	.	IV:704483-709250	WT	ksp1-KD	OK	56.7889	179.563	1.66081	5.72696	5e-05	0.000294606	yes	3.16194	Yes
YLR058C_mRNA	YLR058C	YLR058C	.	.	XII:257991-259401	WT	ksp1-KD	OK	218.906	688.679	1.65352	6.44533	5e-05	0.000294606	yes	3.146	Yes
YNR034W-A_mRNA	YNR034W-A	YNR034W-A	.	.	XIV:692560-692857	WT	ksp1-KD	OK	421.194	1324.99	1.65343	9.76677	5e-05	0.000294606	yes	3.14581	Yes
YDL131W_mRNA	YDL131W	YDL131W	.	.	IV:227392-228715	WT	ksp1-KD	OK	204.774	642.539	1.64975	5.896	5e-05	0.000294606	yes	3.13779	Yes
YKR069W_mRNA	YKR069W	YKR069W	.	.	XI:571611-573393	WT	ksp1-KD	OK	33.6346	105.16	1.64457	7.3525	5e-05	0.000294606	yes	3.12655	Yes
YOL091W_mRNA	YOL091W	YOL091W	.	.	XV:145333-147163	WT	ksp1-KD	OK	5.11221	15.9677	1.64314	6.32765	5e-05	0.000294606	yes	3.12345	Yes
YGR236C_mRNA	YGR236C	YGR236C	.	.	VII:962529-962817	WT	ksp1-KD	OK	25.2837	78.7922	1.63985	6.76076	5e-05	0.000294606	yes	3.11633	Yes
YDR384C_mRNA	YDR384C	YDR384C	.	.	IV:1241203-1242031	WT	ksp1-KD	OK	93.1239	288.058	1.62914	7.60298	5e-05	0.000294606	yes	3.09329	Yes
YLR042C_mRNA	YLR042C	YLR042C	.	.	XII:229965-230451	WT	ksp1-KD	OK	6.08702	18.799	1.62685	6.72989	5e-05	0.000294606	yes	3.08838	Yes
YIL094C_mRNA	YIL094C	YIL094C	.	.	IX:186516-187632	WT	ksp1-KD	OK	241.655	745.454	1.62517	6.53439	5e-05	0.000294606	yes	3.08479	Yes
YDL223C_mRNA	YDL223C	YDL223C	.	.	IV:57264-60405	WT	ksp1-KD	OK	14.5036	44.7157	1.62437	8.5918	5e-05	0.000294606	yes	3.08308	Yes
YDL245C_mRNA	YDL245C	YDL245C	.	.	IV:11656-13360	WT	ksp1-KD	OK	0.46617	1.43321	1.62032	3.8016	5e-05	0.000294606	yes	3.07443	Yes
YKL029C_mRNA	YKL029C	YKL029C	.	.	XI:382497-384725	WT	ksp1-KD	OK	127.165	390.454	1.61845	5.89883	5e-05	0.000294606	yes	3.07045	Yes
YBR043C_mRNA	YBR043C	YBR043C	.	.	II:321875-323945	WT	ksp1-KD	OK	136.206	418.01	1.61775	6.06401	5e-05	0.000294606	yes	3.06896	Yes
YPL273W_mRNA	YPL273W	YPL273W	.	.	XVI:25086-26064	WT	ksp1-KD	OK	43.3829	132.917	1.61532	7.70217	5e-05	0.000294606	yes	3.0638	Yes
YGL125W_mRNA	YGL125W	YGL125W	.	.	VII:272519-274322	WT	ksp1-KD	OK	44.414	135.511	1.60932	9.81194	5e-05	0.000294606	yes	3.05108	Yes
YIL164C_mRNA	YIL164C	YIL164C	.	.	IX:34086-34686	WT	ksp1-KD	OK	585.832	1784.83	1.60723	6.28097	5e-05	0.000294606	yes	3.04666	Yes
YNL269W_mRNA	YNL269W	YNL269W	.	.	XIV:137698-138094	WT	ksp1-KD	OK	1.10566	3.35899	1.60312	8.46868	5e-05	0.000294606	yes	3.038	Yes
YNL220W_mRNA	YNL220W	YNL220W	.	.	XIV:234412-235714	WT	ksp1-KD	OK	155.469	469.369	1.59409	5.61352	5e-05	0.000294606	yes	3.01904	Yes
YGL032C_mRNA	YGL032C	YGL032C	.	.	VII:436569-436833	WT	ksp1-KD	OK	9.86067	29.6474	1.58815	6.26468	5e-05	0.000294606	yes	3.00664	Yes
YHL046C_mRNA	YHL046C	YHL046C	.	.	VIII:11922-12285	WT	ksp1-KD	OK	0.712724	2.13026	1.57961	4.66354	0.0012	0.00503148	yes	2.98889	Yes
YDR258C_mRNA	YDR258C	YDR258C	.	.	IV:971807-974243	WT	ksp1-KD	OK	144.047	430.285	1.57875	7.22365	5e-05	0.000294606	yes	2.98711	Yes
YMR306C-A_mRNA	YMR306C-A	YMR306C-A	.	.	XIII:881158-886572	WT	ksp1-KD	OK	6.21565	18.4906	1.57281	2.35469	0.00095	0.00409691	yes	2.97484	Yes
YMR108W_mRNA	YMR108W	YMR108W	.	.	XIII:484083-486147	WT	ksp1-KD	OK	166.124	489.83	1.56002	5.294	5e-05	0.000294606	yes	2.94858	Yes
YDL124W_mRNA	YDL124W	YDL124W	.	.	IV:240258-241197	WT	ksp1-KD	OK	144.946	426.591	1.55734	6.13109	5e-05	0.000294606	yes	2.94311	Yes
YDR508C_mRNA	YDR508C	YDR508C	.	.	IV:1466452-1468573	WT	ksp1-KD	OK	4.69375	13.5857	1.53327	5.60897	5e-05	0.000294606	yes	2.89441	Yes
YJL045W_mRNA	YJL045W	YJL045W	.	.	X:356023-357928	WT	ksp1-KD	OK	7.25978	20.9907	1.53176	6.80173	5e-05	0.000294606	yes	2.89138	Yes
YDL024C_mRNA	YDL024C	YDL024C	.	.	IV:408450-410056	WT	ksp1-KD	OK	5.49029	15.7345	1.51897	6.38237	5e-05	0.000294606	yes	2.86586	Yes
YBR072W_mRNA	YBR072W	YBR072W	.	.	II:382029-382674	WT	ksp1-KD	OK	22.2253	63.3215	1.51049	6.38582	5e-05	0.000294606	yes	2.84907	Yes
YKL033W-A_mRNA	YKL033W-A	YKL033W-A	.	.	XI:374504-375215	WT	ksp1-KD	OK	127.72	362.702	1.5058	7.86268	5e-05	0.000294606	yes	2.83982	Yes
YLL057C_mRNA	YLL057C	YLL057C	.	.	XII:25755-26994	WT	ksp1-KD	OK	6.9847	19.7999	1.50323	5.67781	5e-05	0.000294606	yes	2.83477	Yes
YAL054C_mRNA	YAL054C	YAL054C	.	.	I:42880-45022	WT	ksp1-KD	OK	11.1045	31.4153	1.50032	6.8861	5e-05	0.000294606	yes	2.82905	Yes
YJR154W_mRNA	YJR154W	YJR154W	.	.	X:725783-726824	WT	ksp1-KD	OK	28.6391	80.6254	1.49325	8.13063	5e-05	0.000294606	yes	2.81522	Yes
YPL135C-A_mRNA	YPL135C-A	YPL135C-A	.	.	XVI:297552-298050	WT	ksp1-KD	OK	2094.23	5858.45	1.4841	3.39732	0.0001	0.000557854	yes	2.79743	Yes
YOL164W_mRNA	YOL164W	YOL164W	.	.	XV:6174-8115	WT	ksp1-KD	OK	60.5077	168.22	1.47516	6.61328	5e-05	0.000294606	yes	2.78014	Yes
YKL118W_mRNA	YKL118W	YKL118W	.	.	XI:218569-219437	WT	ksp1-KD	OK	3.13077	8.70381	1.47513	2.05042	0.01065	0.0315615	yes	2.78009	Yes
YFR030W_mRNA	YFR030W	YFR030W	.	.	VI:213311-216419	WT	ksp1-KD	OK	57.5779	159.112	1.46646	5.40631	5e-05	0.000294606	yes	2.76343	Yes
YPR111W_mRNA	YPR111W	YPR111W	.	.	XVI:747305-749000	WT	ksp1-KD	OK	20.8264	57.3727	1.46195	7.32974	5e-05	0.000294606	yes	2.7548	Yes
YPL186C_mRNA	YPL186C	YPL186C	.	.	XVI:194511-195648	WT	ksp1-KD	OK	61.3344	167.894	1.45278	6.12526	5e-05	0.000294606	yes	2.73735	Yes
YMR303C_mRNA	YMR303C	YMR303C	.	.	XIII:873290-874337	WT	ksp1-KD	OK	18.7945	51.3036	1.44875	6.40236	5e-05	0.000294606	yes	2.72971	Yes
YOR303W_mRNA	YOR303W	YOR303W	.	.	XV:882898-884134	WT	ksp1-KD	OK	892.19	2432.31	1.4469	5.01549	5e-05	0.000294606	yes	2.72622	Yes
YPL135W_mRNA	YPL135W	YPL135W	.	.	XVI:297552-298050	WT	ksp1-KD	OK	296.148	801.174	1.4358	5.12979	5e-05	0.000294606	yes	2.70532	Yes
YCL009C_mRNA	YCL009C	YCL009C	.	.	III:104618-105548	WT	ksp1-KD	OK	353.035	954.662	1.43518	5.62452	5e-05	0.000294606	yes	2.70416	Yes
YDR487C_mRNA	YDR487C	YDR487C	.	.	IV:1428353-1428980	WT	ksp1-KD	OK	243.356	657.37	1.43364	6.95613	5e-05	0.000294606	yes	2.70127	Yes
YKL023W_mRNA	YKL023W	YKL023W	.	.	XI:393720-394554	WT	ksp1-KD	OK	52.9664	142.603	1.42886	6.97583	5e-05	0.000294606	yes	2.69234	Yes
YPL185W_mRNA	YPL185W	YPL185W	.	.	XVI:194511-195648	WT	ksp1-KD	OK	21.0423	56.6427	1.4286	1.86083	0.0031	0.0111927	yes	2.69185	Yes
YLR308W_mRNA	YLR308W	YLR308W	.	.	XII:747936-748875	WT	ksp1-KD	OK	0.427101	1.14785	1.42629	2.65042	5e-05	0.000294606	yes	2.68755	Yes
snR10_snoRNA	snR10	snR10	.	.	VII:345835-346230	WT	ksp1-KD	OK	19.8253	53.2812	1.42628	5.04727	5e-05	0.000294606	yes	2.68753	Yes
YNL065W_mRNA	YNL065W	YNL065W	.	.	XIV:503723-505484	WT	ksp1-KD	OK	58.0292	155.946	1.4262	5.93803	5e-05	0.000294606	yes	2.68738	Yes
YER024W_mRNA	YER024W	YER024W	.	.	V:202191-204963	WT	ksp1-KD	OK	18.0502	48.4679	1.42501	6.65299	5e-05	0.000294606	yes	2.68516	Yes
YMR090W_mRNA	YMR090W	YMR090W	.	.	XIII:449244-449928	WT	ksp1-KD	OK	334.95	896.652	1.4206	11.9225	5e-05	0.000294606	yes	2.67697	Yes
YLR004C_mRNA	YLR004C	YLR004C	.	.	XII:157933-159505	WT	ksp1-KD	OK	22.6144	60.1441	1.41118	6.43841	5e-05	0.000294606	yes	2.65955	Yes
YDR446W_mRNA	YDR446W	YDR446W	.	.	IV:1353724-1354633	WT	ksp1-KD	OK	0.563843	1.49595	1.4077	2.75515	5e-05	0.000294606	yes	2.65314	Yes
YIL165C_mRNA	YIL165C	YIL165C	.	.	IX:33717-34077	WT	ksp1-KD	OK	3515.6	9314.17	1.40566	12.4703	5e-05	0.000294606	yes	2.64939	Yes
YJL116C_mRNA	YJL116C	YJL116C	.	.	X:193859-194873	WT	ksp1-KD	OK	63.5202	168.24	1.40523	6.02268	5e-05	0.000294606	yes	2.6486	Yes
YML042W_mRNA	YML042W	YML042W	.	.	XIII:192787-194800	WT	ksp1-KD	OK	11.1088	29.2365	1.39606	6.77856	5e-05	0.000294606	yes	2.63182	Yes
YNR050C_mRNA	YNR050C	YNR050C	.	.	XIV:714047-715388	WT	ksp1-KD	OK	190.326	499.287	1.39139	4.94959	5e-05	0.000294606	yes	2.62331	Yes
YEL070W_mRNA	YEL070W	YEL070W	.	.	V:19588-21097	WT	ksp1-KD	OK	0.326528	0.855026	1.38876	2.7669	5e-05	0.000294606	yes	2.61854	Yes
YJL072C_mRNA	YJL072C	YJL072C	.	.	X:305220-305862	WT	ksp1-KD	OK	52.1859	136.09	1.38283	6.3507	5e-05	0.000294606	yes	2.60779	Yes
YGR124W_mRNA	YGR124W	YGR124W	.	.	VII:739943-741662	WT	ksp1-KD	OK	170.29	443.883	1.38219	4.66161	5e-05	0.000294606	yes	2.60664	Yes
YIL136W_mRNA	YIL136W	YIL136W	.	.	IX:93618-94800	WT	ksp1-KD	OK	158.161	411.446	1.37931	6.41706	5e-05	0.000294606	yes	2.60144	Yes
YER086W_mRNA	YER086W	YER086W	.	.	V:328476-330207	WT	ksp1-KD	OK	285.073	739.656	1.37552	5.43062	5e-05	0.000294606	yes	2.59461	Yes
YJL137C_mRNA	YJL137C	YJL137C	.	.	X:154984-156127	WT	ksp1-KD	OK	22.6667	58.7521	1.37406	6.80623	5e-05	0.000294606	yes	2.59199	Yes
YBR085C-A_mRNA	YBR085C-A	YBR085C-A	.	.	II:418906-419164	WT	ksp1-KD	OK	1646.76	4263.91	1.37255	5.04545	5e-05	0.000294606	yes	2.58928	Yes
YML116W_mRNA	YML116W	YML116W	.	.	XIII:38195-39824	WT	ksp1-KD	OK	28.3343	73.3473	1.3722	6.82063	5e-05	0.000294606	yes	2.58865	Yes
YOL101C_mRNA	YOL101C	YOL101C	.	.	XV:126981-127920	WT	ksp1-KD	OK	4.98604	12.8987	1.37126	4.59305	5e-05	0.000294606	yes	2.58696	Yes
YMR094W_mRNA	YMR094W	YMR094W	.	.	XIII:455824-457261	WT	ksp1-KD	OK	13.3518	34.3785	1.36447	5.70031	5e-05	0.000294606	yes	2.57482	Yes
YNL117W_mRNA	YNL117W	YNL117W	.	.	XIV:406357-408022	WT	ksp1-KD	OK	129.038	330.76	1.35799	5.54022	5e-05	0.000294606	yes	2.56328	Yes
YDR019C_mRNA	YDR019C	YDR019C	.	.	IV:484162-485365	WT	ksp1-KD	OK	62.9905	161.403	1.35746	5.5745	5e-05	0.000294606	yes	2.56234	Yes
YPL171C_mRNA	YPL171C	YPL171C	.	.	XVI:226168-227371	WT	ksp1-KD	OK	4.42709	11.3096	1.35311	4.56297	5e-05	0.000294606	yes	2.55462	Yes
YGL009C_mRNA	YGL009C	YGL009C	.	.	VII:476312-478652	WT	ksp1-KD	OK	143.2	364.667	1.34855	5.14934	5e-05	0.000294606	yes	2.54656	Yes
YPL111W_mRNA	YPL111W	YPL111W	.	.	XVI:339943-340945	WT	ksp1-KD	OK	48.7493	124.034	1.34729	6.15164	5e-05	0.000294606	yes	2.54434	Yes
YBR297W_mRNA	YBR297W	YBR297W	.	.	II:800522-801929	WT	ksp1-KD	OK	38.907	98.765	1.34397	6.37726	5e-05	0.000294606	yes	2.53849	Yes
YPR145C-A_mRNA	YPR145C-A	YPR145C-A	.	.	XVI:824689-824926	WT	ksp1-KD	OK	173.71	440.84	1.34357	8.78433	5e-05	0.000294606	yes	2.53779	Yes
YDR374C_mRNA	YDR374C	YDR374C	.	.	IV:1223473-1224394	WT	ksp1-KD	OK	1.08607	2.7504	1.34052	3.61032	5e-05	0.000294606	yes	2.53243	Yes
YNL240C_mRNA	YNL240C	YNL240C	.	.	XIV:198501-199977	WT	ksp1-KD	OK	49.2913	124.523	1.337	6.31777	5e-05	0.000294606	yes	2.52625	Yes
YLR092W_mRNA	YLR092W	YLR092W	.	.	XII:323543-326225	WT	ksp1-KD	OK	23.8251	59.8417	1.32867	5.70919	5e-05	0.000294606	yes	2.51171	Yes
YKR076W_mRNA	YKR076W	YKR076W	.	.	XI:582282-583395	WT	ksp1-KD	OK	65.3688	162.803	1.31645	6.96537	5e-05	0.000294606	yes	2.49053	Yes
YBL075C_mRNA	YBL075C	YBL075C	.	.	II:84498-86448	WT	ksp1-KD	OK	27.4691	68.3518	1.31517	5.60767	5e-05	0.000294606	yes	2.48832	Yes
YER062C_mRNA	YER062C	YER062C	.	.	V:279929-280682	WT	ksp1-KD	OK	306.71	759.839	1.30882	4.83875	5e-05	0.000294606	yes	2.47739	Yes
YGR161W-C_mRNA	YGR161W-C	YGR161W-C	.	.	VII:810226-810505	WT	ksp1-KD	OK	101.87	252.262	1.30819	5.35041	5e-05	0.000294606	yes	2.47631	Yes
YER176W_mRNA	YER176W	YER176W	.	.	V:541689-545055	WT	ksp1-KD	OK	23.2343	57.5146	1.30767	5.91104	5e-05	0.000294606	yes	2.47541	Yes
YGR267C_mRNA	YGR267C	YGR267C	.	.	VII:1025003-1025735	WT	ksp1-KD	OK	433.067	1068.93	1.3035	5.78779	5e-05	0.000294606	yes	2.46827	Yes
YKL188C_mRNA	YKL188C	YKL188C	.	.	XI:86224-88786	WT	ksp1-KD	OK	7.15262	17.6359	1.30198	7.35907	5e-05	0.000294606	yes	2.46567	Yes
YMR250W_mRNA	YMR250W	YMR250W	.	.	XIII:770800-772558	WT	ksp1-KD	OK	78.1845	192.663	1.30112	6.30608	5e-05	0.000294606	yes	2.4642	Yes
YIL099W_mRNA	YIL099W	YIL099W	.	.	IX:178003-179653	WT	ksp1-KD	OK	8.39521	20.6859	1.30101	6.10626	5e-05	0.000294606	yes	2.46401	Yes
YHR126C_mRNA	YHR126C	YHR126C	.	.	VIII:359701-360181	WT	ksp1-KD	OK	0.73596	1.80893	1.29743	2.45604	0.002	0.00776	yes	2.45791	Yes
YLR070C_mRNA	YLR070C	YLR070C	.	.	XII:274140-275211	WT	ksp1-KD	OK	17.0294	41.8542	1.29734	6.56371	5e-05	0.000294606	yes	2.45775	Yes
YKR009C_mRNA	YKR009C	YKR009C	.	.	XI:454351-457054	WT	ksp1-KD	OK	7.78119	19.0501	1.29173	6.3986	5e-05	0.000294606	yes	2.44821	Yes
YGL015C_mRNA	YGL015C	YGL015C	.	.	VII:465042-465435	WT	ksp1-KD	OK	2.94854	7.17575	1.28313	2.73058	5e-05	0.000294606	yes	2.43366	Yes
YOL131W_mRNA	YOL131W	YOL131W	.	.	XV:73030-73357	WT	ksp1-KD	OK	36.4252	88.5494	1.28154	5.29081	5e-05	0.000294606	yes	2.43098	Yes
YMR120C_mRNA	YMR120C	YMR120C	.	.	XIII:507501-509280	WT	ksp1-KD	OK	140.516	340.994	1.27901	4.96991	5e-05	0.000294606	yes	2.42672	Yes
YNL202W_mRNA	YNL202W	YNL202W	.	.	XIV:259438-260456	WT	ksp1-KD	OK	17.9701	43.591	1.27843	7.98682	5e-05	0.000294606	yes	2.42575	Yes
YOR201C_mRNA	YOR201C	YOR201C	.	.	XV:720180-721708	WT	ksp1-KD	OK	52.7381	127.592	1.27462	5.77721	5e-05	0.000294606	yes	2.41935	Yes
YER091C_mRNA	YER091C	YER091C	.	.	V:339863-342167	WT	ksp1-KD	OK	422.237	1020.06	1.27253	4.11492	5e-05	0.000294606	yes	2.41585	Yes
YBL102W_mRNA	YBL102W	YBL102W	.	.	II:24097-24745	WT	ksp1-KD	OK	47.5569	114.829	1.27176	13.9271	5e-05	0.000294606	yes	2.41456	Yes
YIL111W_mRNA	YIL111W	YIL111W	.	.	IX:155310-155765	WT	ksp1-KD	OK	107.311	258.78	1.26993	7.74568	5e-05	0.000294606	yes	2.4115	Yes
YIL102C_mRNA	YIL102C	YIL102C	.	.	IX:174581-174887	WT	ksp1-KD	OK	6.03372	14.5499	1.26989	2.76725	5e-05	0.000294606	yes	2.41143	Yes
YDR525W_mRNA	YDR525W	YDR525W	.	.	IV:1489870-1490234	WT	ksp1-KD	OK	0.976865	2.35449	1.26918	1.75566	0.00445	0.0152374	yes	2.41025	Yes
YEL071W_mRNA	YEL071W	YEL071W	.	.	V:16354-17845	WT	ksp1-KD	OK	62.4856	150.406	1.26727	7.58012	5e-05	0.000294606	yes	2.40706	Yes
YOL126C_mRNA	YOL126C	YOL126C	.	.	XV:81786-82920	WT	ksp1-KD	OK	169.472	406.573	1.26247	4.59553	5e-05	0.000294606	yes	2.39906	Yes
YBR218C_mRNA	YBR218C	YBR218C	.	.	II:658706-662249	WT	ksp1-KD	OK	82.4303	197.727	1.26226	4.64062	5e-05	0.000294606	yes	2.39871	Yes
YGR201C_mRNA	YGR201C	YGR201C	.	.	VII:902519-903197	WT	ksp1-KD	OK	77.64	186.137	1.2615	6.69808	5e-05	0.000294606	yes	2.39745	Yes
YHL045W_mRNA	YHL045W	YHL045W	.	.	VIII:12501-12849	WT	ksp1-KD	OK	7.62027	18.1812	1.25453	3.85712	5e-05	0.000294606	yes	2.38589	Yes
YHL016C_mRNA	YHL016C	YHL016C	.	.	VIII:72036-74244	WT	ksp1-KD	OK	163.539	390.106	1.25423	4.01161	5e-05	0.000294606	yes	2.3854	Yes
YGL148W_mRNA	YGL148W	YGL148W	.	.	VII:226398-227529	WT	ksp1-KD	OK	219.609	521.854	1.24871	4.68108	5e-05	0.000294606	yes	2.37629	Yes
YGL258W-A_mRNA	YGL258W-A	YGL258W-A	.	.	VII:9161-9395	WT	ksp1-KD	OK	22.1116	52.5005	1.24753	4.61471	0.00015	0.000804996	yes	2.37435	Yes
YDR037W_mRNA	YDR037W	YDR037W	.	.	IV:525439-527215	WT	ksp1-KD	OK	110.311	260.818	1.24146	5.35586	5e-05	0.000294606	yes	2.36438	Yes
YMR056C_mRNA	YMR056C	YMR056C	.	.	XIII:387314-388244	WT	ksp1-KD	OK	46.4498	109.611	1.23864	6.1514	5e-05	0.000294606	yes	2.35976	Yes
snR35_snoRNA	snR35	snR35	.	.	XV:759325-759529	WT	ksp1-KD	OK	51.4061	120.999	1.23498	3.61242	5e-05	0.000294606	yes	2.35378	Yes
YDL170W_mRNA	YDL170W	YDL170W	.	.	IV:156317-157904	WT	ksp1-KD	OK	86.0565	202.503	1.23459	6.08442	5e-05	0.000294606	yes	2.35314	Yes
YGL018C_mRNA	YGL018C	YGL018C	.	.	VII:459109-459664	WT	ksp1-KD	OK	32.8439	76.9957	1.22915	10.8199	5e-05	0.000294606	yes	2.34429	Yes
YPL058C_mRNA	YPL058C	YPL058C	.	.	XVI:445841-450377	WT	ksp1-KD	OK	21.2916	49.8862	1.22836	5.18844	5e-05	0.000294606	yes	2.343	Yes
YER128W_mRNA	YER128W	YER128W	.	.	V:415858-416470	WT	ksp1-KD	OK	64.8699	151.935	1.22784	5.75351	5e-05	0.000294606	yes	2.34216	Yes
YHR095W_mRNA	YHR095W	YHR095W	.	.	VIII:292942-293437	WT	ksp1-KD	OK	0.904409	2.11139	1.22315	3.39299	0.0032	0.0114899	yes	2.33456	Yes
YGL154C_mRNA	YGL154C	YGL154C	.	.	VII:215277-216096	WT	ksp1-KD	OK	56.8108	132.611	1.22297	6.19445	5e-05	0.000294606	yes	2.33427	Yes
YMR159C_mRNA	YMR159C	YMR159C	.	.	XIII:574470-574928	WT	ksp1-KD	OK	35.3864	82.5301	1.22173	7.22348	5e-05	0.000294606	yes	2.33226	Yes
YLR355C_mRNA	YLR355C	YLR355C	.	.	XII:838065-839253	WT	ksp1-KD	OK	749.822	1748.47	1.22147	4.90807	5e-05	0.000294606	yes	2.33184	Yes
YDR492W_mRNA	YDR492W	YDR492W	.	.	IV:1434499-1435874	WT	ksp1-KD	OK	131.794	306.642	1.21827	5.34869	5e-05	0.000294606	yes	2.32668	Yes
YOR226C_mRNA	YOR226C	YOR226C	.	.	XV:761391-762084	WT	ksp1-KD	OK	27.2573	63.4057	1.21797	19.8059	5e-05	0.000294606	yes	2.32619	Yes
YDR234W_mRNA	YDR234W	YDR234W	.	.	IV:931128-933210	WT	ksp1-KD	OK	100.628	233.978	1.21734	4.32787	5e-05	0.000294606	yes	2.32518	Yes
YOR235W_mRNA	YOR235W	YOR235W	.	.	XV:779869-780596	WT	ksp1-KD	OK	7.87291	18.3045	1.21723	3.96865	0.0031	0.0111927	yes	2.325	Yes
YPR160W_mRNA	YPR160W	YPR160W	.	.	XVI:861305-864014	WT	ksp1-KD	OK	95.5374	221.944	1.21606	4.17673	5e-05	0.000294606	yes	2.32311	Yes
YER053C-A_mRNA	YER053C-A	YER053C-A	.	.	V:260932-261046	WT	ksp1-KD	OK	1519.7	3530.41	1.21605	7.71413	5e-05	0.000294606	yes	2.3231	Yes
YOR020C_mRNA	YOR020C	YOR020C	.	.	XV:370523-370844	WT	ksp1-KD	OK	809.826	1881.02	1.21583	7.02581	5e-05	0.000294606	yes	2.32274	Yes
YKR036C_mRNA	YKR036C	YKR036C	.	.	XI:508701-510633	WT	ksp1-KD	OK	17.1296	39.7498	1.21446	5.88178	5e-05	0.000294606	yes	2.32054	Yes
YGR248W_mRNA	YGR248W	YGR248W	.	.	VII:985971-986739	WT	ksp1-KD	OK	41.2087	95.6204	1.21437	6.06359	5e-05	0.000294606	yes	2.32039	Yes
YGL259W_mRNA	YGL259W	YGL259W	.	.	VII:8469-8967	WT	ksp1-KD	OK	5.98516	13.865	1.21198	3.98648	5e-05	0.000294606	yes	2.31655	Yes
YDR186C_mRNA	YDR186C	YDR186C	.	.	IV:832858-835492	WT	ksp1-KD	OK	51.0305	117.432	1.20239	5.0494	5e-05	0.000294606	yes	2.30121	Yes
YNR073C_mRNA	YNR073C	YNR073C	.	.	XIV:774791-776300	WT	ksp1-KD	OK	0.178708	0.410144	1.19852	1.9951	0.00105	0.0044806	yes	2.29504	Yes
YJL153C_mRNA	YJL153C	YJL153C	.	.	X:134331-135933	WT	ksp1-KD	OK	18.0463	41.3457	1.19604	5.20694	5e-05	0.000294606	yes	2.2911	Yes
YJL038C_mRNA	YJL038C	YJL038C	.	.	X:375114-375774	WT	ksp1-KD	OK	11.3694	26.0453	1.19586	4.97543	5e-05	0.000294606	yes	2.29081	Yes
YDL214C_mRNA	YDL214C	YDL214C	.	.	IV:74445-76545	WT	ksp1-KD	OK	8.88003	20.2924	1.19231	5.1866	5e-05	0.000294606	yes	2.28518	Yes
YNL311C_mRNA	YNL311C	YNL311C	.	.	XIV:49396-51688	WT	ksp1-KD	OK	36.8738	84.2377	1.19187	5.21741	5e-05	0.000294606	yes	2.28449	Yes
YJR155W_mRNA	YJR155W	YJR155W	.	.	X:727404-728271	WT	ksp1-KD	OK	40.2863	91.8265	1.18862	5.44912	5e-05	0.000294606	yes	2.27935	Yes
YKL096C-B_mRNA	YKL096C-B	YKL096C-B	.	.	XI:259072-259222	WT	ksp1-KD	OK	94.701	215.505	1.18627	3.04957	0.00055	0.00257711	yes	2.27564	Yes
YPR015C_mRNA	YPR015C	YPR015C	.	.	XVI:590282-591026	WT	ksp1-KD	OK	2.49797	5.68386	1.18611	4.42392	5e-05	0.000294606	yes	2.27538	Yes
YBR201C-A_mRNA	YBR201C-A	YBR201C-A	.	.	II:624492-624696	WT	ksp1-KD	OK	413.432	939.863	1.1848	4.92991	5e-05	0.000294606	yes	2.27332	Yes
YLR027C_mRNA	YLR027C	YLR027C	.	.	XII:196828-198085	WT	ksp1-KD	OK	282.833	640.221	1.17862	4.04863	5e-05	0.000294606	yes	2.2636	Yes
YGR096W_mRNA	YGR096W	YGR096W	.	.	VII:676620-677565	WT	ksp1-KD	OK	27.3382	61.4934	1.16951	5.7235	5e-05	0.000294606	yes	2.24935	Yes
YCL027W_mRNA	YCL027W	YCL027W	.	.	III:71802-73341	WT	ksp1-KD	OK	3.16844	7.10997	1.16607	5.7956	5e-05	0.000294606	yes	2.244	Yes
YOR184W_mRNA	YOR184W	YOR184W	.	.	XV:679356-680544	WT	ksp1-KD	OK	171.731	385.051	1.1649	4.48034	5e-05	0.000294606	yes	2.24218	Yes
YGL121C_mRNA	YGL121C	YGL121C	.	.	VII:280776-281157	WT	ksp1-KD	OK	252.649	566.368	1.16461	5.61549	5e-05	0.000294606	yes	2.24173	Yes
YBR035C_mRNA	YBR035C	YBR035C	.	.	II:306268-306955	WT	ksp1-KD	OK	318.211	711.836	1.16156	5.10826	5e-05	0.000294606	yes	2.23699	Yes
YFR049W_mRNA	YFR049W	YFR049W	.	.	VI:248522-248894	WT	ksp1-KD	OK	261.148	582.054	1.15629	6.84518	5e-05	0.000294606	yes	2.22884	Yes
YLR053C_mRNA	YLR053C	YLR053C	.	.	XII:248099-248426	WT	ksp1-KD	OK	642.555	1430.4	1.15452	9.3448	5e-05	0.000294606	yes	2.2261	Yes
YPR058W_mRNA	YPR058W	YPR058W	.	.	XVI:673750-674700	WT	ksp1-KD	OK	228.447	507.607	1.15185	3.76533	5e-05	0.000294606	yes	2.22199	Yes
YPL230W_mRNA	YPL230W	YPL230W	.	.	XVI:115311-116487	WT	ksp1-KD	OK	11.3706	25.1664	1.14619	5.84834	5e-05	0.000294606	yes	2.21329	Yes
YHR029C_mRNA	YHR029C	YHR029C	.	.	VIII:167676-168561	WT	ksp1-KD	OK	1207.03	2671.02	1.14592	3.63216	5e-05	0.000294606	yes	2.21287	Yes
YJR108W_mRNA	YJR108W	YJR108W	.	.	X:628711-629083	WT	ksp1-KD	OK	3.57851	7.89794	1.14212	2.35607	0.0001	0.000557854	yes	2.20705	Yes
YBL016W_mRNA	YBL016W	YBL016W	.	.	II:192450-193512	WT	ksp1-KD	OK	1.47384	3.25186	1.14169	2.90466	5e-05	0.000294606	yes	2.20639	Yes
YER181C_mRNA	YER181C	YER181C	.	.	V:551472-551796	WT	ksp1-KD	OK	2.16569	4.77798	1.14158	1.94458	0.00325	0.0116373	yes	2.20623	Yes
YNL036W_mRNA	YNL036W	YNL036W	.	.	XIV:559813-560479	WT	ksp1-KD	OK	716.377	1577.65	1.13899	4.22297	5e-05	0.000294606	yes	2.20227	Yes
YNL162W-A_mRNA	YNL162W-A	YNL162W-A	.	.	XIV:330328-330547	WT	ksp1-KD	OK	127.822	280.518	1.13396	3.98747	5e-05	0.000294606	yes	2.1946	Yes
YFL028C_mRNA	YFL028C	YFL028C	.	.	VI:79343-80213	WT	ksp1-KD	OK	238.106	521.147	1.13009	6.24455	5e-05	0.000294606	yes	2.18872	Yes
YGL180W_mRNA	YGL180W	YGL180W	.	.	VII:160064-162758	WT	ksp1-KD	OK	39.1123	85.5731	1.12953	4.8986	5e-05	0.000294606	yes	2.18787	Yes
YMR118C_mRNA	YMR118C	YMR118C	.	.	XIII:502143-502734	WT	ksp1-KD	OK	17.9482	39.2309	1.12815	4.09219	5e-05	0.000294606	yes	2.18578	Yes
YPL177C_mRNA	YPL177C	YPL177C	.	.	XVI:213041-213962	WT	ksp1-KD	OK	81.2333	177.462	1.12736	6.37655	5e-05	0.000294606	yes	2.18459	Yes
YGR110W_mRNA	YGR110W	YGR110W	.	.	VII:713708-715046	WT	ksp1-KD	OK	39.2252	85.5339	1.12472	5.31507	5e-05	0.000294606	yes	2.18059	Yes
YBR046C_mRNA	YBR046C	YBR046C	.	.	II:330506-331511	WT	ksp1-KD	OK	60.2504	131.185	1.12256	5.36319	5e-05	0.000294606	yes	2.17733	Yes
YGL081W_mRNA	YGL081W	YGL081W	.	.	VII:357376-358339	WT	ksp1-KD	OK	4.39535	9.54977	1.11949	3.83206	5e-05	0.000294606	yes	2.1727	Yes
YHR047C_mRNA	YHR047C	YHR047C	.	.	VIII:198739-201310	WT	ksp1-KD	OK	12.4969	27.1518	1.11948	5.61537	5e-05	0.000294606	yes	2.17269	Yes
YNR056C_mRNA	YNR056C	YNR056C	.	.	XIV:731617-733303	WT	ksp1-KD	OK	8.07378	17.5248	1.11808	4.53522	5e-05	0.000294606	yes	2.17058	Yes
YPL120W_mRNA	YPL120W	YPL120W	.	.	XVI:322070-323744	WT	ksp1-KD	OK	16.4997	35.8092	1.11789	5.29176	5e-05	0.000294606	yes	2.17029	Yes
YOL059W_mRNA	YOL059W	YOL059W	.	.	XV:217125-218448	WT	ksp1-KD	OK	267.502	579.816	1.11605	5.75881	5e-05	0.000294606	yes	2.16753	Yes
YHL044W_mRNA	YHL044W	YHL044W	.	.	VIII:13564-14272	WT	ksp1-KD	OK	18.4223	39.6917	1.10738	4.52398	5e-05	0.000294606	yes	2.15454	Yes
YPL188W_mRNA	YPL188W	YPL188W	.	.	XVI:191405-192650	WT	ksp1-KD	OK	63.3181	136.14	1.1044	5.21818	5e-05	0.000294606	yes	2.15009	Yes
YGL223C_mRNA	YGL223C	YGL223C	.	.	VII:79111-80365	WT	ksp1-KD	OK	45.7816	97.9569	1.09738	5.26391	5e-05	0.000294606	yes	2.13966	Yes
YJR153W_mRNA	YJR153W	YJR153W	.	.	X:722814-723900	WT	ksp1-KD	OK	9.53983	20.4026	1.09671	4.15123	5e-05	0.000294606	yes	2.13866	Yes
YEL046C_mRNA	YEL046C	YEL046C	.	.	V:67628-68792	WT	ksp1-KD	OK	486.638	1040.58	1.09646	3.61234	5e-05	0.000294606	yes	2.13829	Yes
YLR080W_mRNA	YLR080W	YLR080W	.	.	XII:287915-289250	WT	ksp1-KD	OK	53.2967	113.722	1.09339	9.31619	5e-05	0.000294606	yes	2.13375	Yes
YLR250W_mRNA	YLR250W	YLR250W	.	.	XII:640316-641021	WT	ksp1-KD	OK	201.534	428.847	1.08944	6.96226	5e-05	0.000294606	yes	2.12791	Yes
YHR125W_mRNA	YHR125W	YHR125W	.	.	VIII:358857-359163	WT	ksp1-KD	OK	7.40574	15.7411	1.08782	2.4096	5e-05	0.000294606	yes	2.12553	Yes
YIL061C_mRNA	YIL061C	YIL061C	.	.	IX:244656-245559	WT	ksp1-KD	OK	20.4089	43.3327	1.08626	5.2788	5e-05	0.000294606	yes	2.12323	Yes
YPR002W_mRNA	YPR002W	YPR002W	.	.	XVI:558384-559935	WT	ksp1-KD	OK	16.1491	34.2492	1.08461	4.94667	5e-05	0.000294606	yes	2.1208	Yes
YBR144C_mRNA	YBR144C	YBR144C	.	.	II:533234-533549	WT	ksp1-KD	OK	2.05852	4.36396	1.08403	2.11709	0.0083	0.0256133	yes	2.11995	Yes
YGR087C_mRNA	YGR087C	YGR087C	.	.	VII:651289-652981	WT	ksp1-KD	OK	84.3007	178.514	1.08242	3.96992	5e-05	0.000294606	yes	2.11759	Yes
YPR059C_mRNA	YPR059C	YPR059C	.	.	XVI:673750-674700	WT	ksp1-KD	OK	644.563	1364.89	1.08239	4.32568	5e-05	0.000294606	yes	2.11754	Yes
YER039C-A_mRNA	YER039C-A	YER039C-A	.	.	V:229262-229481	WT	ksp1-KD	OK	45.0293	95.3269	1.08202	3.04121	5e-05	0.000294606	yes	2.117	Yes
YER061C_mRNA	YER061C	YER061C	.	.	V:278297-279626	WT	ksp1-KD	OK	55.5274	117.513	1.08155	5.55388	5e-05	0.000294606	yes	2.11631	Yes
YLR211C_mRNA	YLR211C	YLR211C	.	.	XII:563791-564531	WT	ksp1-KD	OK	61.8961	130.825	1.07972	4.9561	5e-05	0.000294606	yes	2.11363	Yes
YMR189W_mRNA	YMR189W	YMR189W	.	.	XIII:637499-640604	WT	ksp1-KD	OK	81.3474	171.444	1.07557	3.89365	5e-05	0.000294606	yes	2.10755	Yes
YGL007C-A_mRNA	YGL007C-A	YGL007C-A	.	.	VII:482940-483027	WT	ksp1-KD	OK	45.2508	95.1798	1.07271	1.6758	0.0157	0.0435672	yes	2.10338	Yes
YPR001W_mRNA	YPR001W	YPR001W	.	.	XVI:556376-557837	WT	ksp1-KD	OK	4.44612	9.34178	1.07115	3.61725	5e-05	0.000294606	yes	2.10111	Yes
YDR242W_mRNA	YDR242W	YDR242W	.	.	IV:946806-948456	WT	ksp1-KD	OK	199.932	419.372	1.06872	4.06268	5e-05	0.000294606	yes	2.09757	Yes
YLR271W_mRNA	YLR271W	YLR271W	.	.	XII:682736-683561	WT	ksp1-KD	OK	55.2014	115.559	1.06585	6.29761	5e-05	0.000294606	yes	2.0934	Yes
YBL103C_mRNA	YBL103C	YBL103C	.	.	II:22075-23536	WT	ksp1-KD	OK	36.7607	76.7648	1.06228	4.99823	5e-05	0.000294606	yes	2.08823	Yes
YER040W_mRNA	YER040W	YER040W	.	.	V:229794-231987	WT	ksp1-KD	OK	14.1394	29.5221	1.06207	5.96961	5e-05	0.000294606	yes	2.08793	Yes
YNL180C_mRNA	YNL180C	YNL180C	.	.	XIV:299653-300649	WT	ksp1-KD	OK	298.668	622.676	1.05994	3.86837	5e-05	0.000294606	yes	2.08484	Yes
YOR134W_mRNA	YOR134W	YOR134W	.	.	XV:578563-579793	WT	ksp1-KD	OK	31.103	64.7992	1.05892	6.31017	5e-05	0.000294606	yes	2.08337	Yes
YGR146C_mRNA	YGR146C	YGR146C	.	.	VII:784222-784858	WT	ksp1-KD	OK	31.1845	64.9177	1.05778	5.54714	5e-05	0.000294606	yes	2.08173	Yes
YLR031W_mRNA	YLR031W	YLR031W	.	.	XII:204224-204785	WT	ksp1-KD	OK	3.80061	7.91141	1.05771	3.91771	5e-05	0.000294606	yes	2.08162	Yes
YCL048W_mRNA	YCL048W	YCL048W	.	.	III:42164-43556	WT	ksp1-KD	OK	2.67948	5.57522	1.05708	3.66316	5e-05	0.000294606	yes	2.08072	Yes
YMR323W_mRNA	YMR323W	YMR323W	.	.	XIII:920087-921401	WT	ksp1-KD	OK	1.21324	2.52315	1.05636	2.88061	5e-05	0.000294606	yes	2.07968	Yes
YHR139C-A_mRNA	YHR139C-A	YHR139C-A	.	.	VIII:380107-380419	WT	ksp1-KD	OK	3.06514	6.36806	1.0549	2.98324	0.0017	0.00674088	yes	2.07757	Yes
YML118W_mRNA	YML118W	YML118W	.	.	XIII:32333-33851	WT	ksp1-KD	OK	5.6223	11.68	1.05481	3.75172	5e-05	0.000294606	yes	2.07744	Yes
YBR250W_mRNA	YBR250W	YBR250W	.	.	II:719032-720604	WT	ksp1-KD	OK	2.28987	4.74544	1.05128	3.95889	5e-05	0.000294606	yes	2.07237	Yes
YIL056W_mRNA	YIL056W	YIL056W	.	.	IX:249990-251913	WT	ksp1-KD	OK	51.6305	106.885	1.04977	4.39665	5e-05	0.000294606	yes	2.0702	Yes
YML130C_mRNA	YML130C	YML130C	.	.	XIII:11482-13174	WT	ksp1-KD	OK	75.575	156.438	1.04961	4.33406	5e-05	0.000294606	yes	2.06997	Yes
YMR194C-B_mRNA	YMR194C-B	YMR194C-B	.	.	XIII:652593-652887	WT	ksp1-KD	OK	92.249	190.938	1.0495	4.10593	5e-05	0.000294606	yes	2.06981	Yes
YML097C_mRNA	YML097C	YML097C	.	.	XIII:78334-79690	WT	ksp1-KD	OK	40.2785	83.2314	1.04712	5.56769	5e-05	0.000294606	yes	2.0664	Yes
YKL055C_mRNA	YKL055C	YKL055C	.	.	XI:335320-336157	WT	ksp1-KD	OK	7.46904	15.4045	1.04436	3.84972	5e-05	0.000294606	yes	2.06245	Yes
YDL184C_mRNA	YDL184C	YDL184C	.	.	IV:130406-130484	WT	ksp1-KD	OK	1323	2727.22	1.04362	3.49243	0.00025	0.00126538	yes	2.06139	Yes
YKL026C_mRNA	YKL026C	YKL026C	.	.	XI:389379-389883	WT	ksp1-KD	OK	41.0539	84.6069	1.04326	28.2045	5e-05	0.000294606	yes	2.06088	Yes
YLR111W_mRNA	YLR111W	YLR111W	.	.	XII:370390-370723	WT	ksp1-KD	OK	0.880991	1.81476	1.04258	1.68177	0.0078	0.0243245	yes	2.05991	Yes
YLR178C_mRNA	YLR178C	YLR178C	.	.	XII:513161-513821	WT	ksp1-KD	OK	292.358	601.761	1.04145	4.15193	5e-05	0.000294606	yes	2.0583	Yes
YHL022C_mRNA	YHL022C	YHL022C	.	.	VIII:62960-64157	WT	ksp1-KD	OK	2.80136	5.76576	1.04139	3.86128	5e-05	0.000294606	yes	2.05821	Yes
YFL019C_mRNA	YFL019C	YFL019C	.	.	VI:100251-100605	WT	ksp1-KD	OK	7.51016	15.435	1.03929	3.99888	5e-05	0.000294606	yes	2.05522	Yes
YDR533C_mRNA	YDR533C	YDR533C	.	.	IV:1501446-1502160	WT	ksp1-KD	OK	144.816	297.626	1.03928	4.55934	5e-05	0.000294606	yes	2.0552	Yes
YDR163W_mRNA	YDR163W	YDR163W	.	.	IV:781422-781950	WT	ksp1-KD	OK	130.551	267.386	1.03431	6.09717	5e-05	0.000294606	yes	2.04813	Yes
YBR213W_mRNA	YBR213W	YBR213W	.	.	II:650367-651192	WT	ksp1-KD	OK	20.0008	40.9215	1.0328	4.15294	5e-05	0.000294606	yes	2.04599	Yes
YBR197C_mRNA	YBR197C	YBR197C	.	.	II:615202-615856	WT	ksp1-KD	OK	67.468	137.821	1.03052	5.19144	5e-05	0.000294606	yes	2.04276	Yes
YNL195C_mRNA	YNL195C	YNL195C	.	.	XIV:271522-272308	WT	ksp1-KD	OK	7.33018	14.9603	1.02922	3.53368	5e-05	0.000294606	yes	2.04092	Yes
YHR021W-A_mRNA	YHR021W-A	YHR021W-A	.	.	VIII:149224-150345	WT	ksp1-KD	OK	2.30419	4.68393	1.02346	1.94804	0.0021	0.00808046	yes	2.03279	Yes
YLR164W_mRNA	YLR164W	YLR164W	.	.	XII:493882-494389	WT	ksp1-KD	OK	49.0685	99.5051	1.01997	4.69963	5e-05	0.000294606	yes	2.02788	Yes
snR57_snoRNA	snR57	snR57	.	.	XII:794936-795024	WT	ksp1-KD	OK	481.251	974.569	1.01798	2.11641	0.0043	0.0148332	yes	2.02508	Yes
YJR122W_mRNA	YJR122W	YJR122W	.	.	X:649775-651269	WT	ksp1-KD	OK	13.1689	26.6083	1.01474	4.68956	5e-05	0.000294606	yes	2.02054	Yes
YFL055W_mRNA	YFL055W	YFL055W	.	.	VI:17003-18680	WT	ksp1-KD	OK	12.7653	25.7331	1.01139	5.55683	5e-05	0.000294606	yes	2.01585	Yes
YNL057W_mRNA	YNL057W	YNL057W	.	.	XIV:515762-516735	WT	ksp1-KD	OK	172.951	347.066	1.00485	4.13141	5e-05	0.000294606	yes	2.00673	Yes
YNL124W_mRNA	YNL124W	YNL124W	.	.	XIV:392891-394370	WT	ksp1-KD	OK	36.0256	72.0786	1.00055	5.43647	5e-05	0.000294606	yes	2.00076	Yes
YPR172W_mRNA	YPR172W	YPR172W	.	.	XVI:885795-886398	WT	ksp1-KD	OK	68.391	136.805	1.00024	4.82192	5e-05	0.000294606	yes	2.00033	Yes
YJR010C-A_mRNA	YJR010C-A	YJR010C-A	.	.	X:458076-458361	WT	ksp1-KD	OK	109.796	219.504	0.999424	5.65517	5e-05	0.000294606	yes	1.9992	Yes
YHR137W_mRNA	YHR137W	YHR137W	.	.	VIII:375708-377250	WT	ksp1-KD	OK	4.85379	9.6722	0.994732	3.20287	5e-05	0.000294606	yes	1.99271	Yes
YCL012C_mRNA	YCL012C	YCL012C	.	.	III:101316-101788	WT	ksp1-KD	OK	47.9404	95.4725	0.993843	7.90617	5e-05	0.000294606	yes	1.99148	Yes
YLL041C_mRNA	YLL041C	YLL041C	.	.	XII:53130-53931	WT	ksp1-KD	OK	300.886	598.29	0.991628	4.33753	5e-05	0.000294606	yes	1.98843	Yes
YGL033W_mRNA	YGL033W	YGL033W	.	.	VII:435624-436401	WT	ksp1-KD	OK	2.40949	4.78913	0.991038	2.35698	0.00025	0.00126538	yes	1.98761	Yes
YDR461C-A_mRNA	YDR461C-A	YDR461C-A	.	.	IV:1385523-1385766	WT	ksp1-KD	OK	246.633	489.846	0.989963	5.07004	5e-05	0.000294606	yes	1.98613	Yes
YNL133C_mRNA	YNL133C	YNL133C	.	.	XIV:374170-374692	WT	ksp1-KD	OK	176.514	350.365	0.989078	12.4354	5e-05	0.000294606	yes	1.98492	Yes
YLR237W_mRNA	YLR237W	YLR237W	.	.	XII:612366-614163	WT	ksp1-KD	OK	65.8228	130.505	0.98745	4.78905	5e-05	0.000294606	yes	1.98268	Yes
YJL133C-A_mRNA	YJL133C-A	YJL133C-A	.	.	X:159622-159847	WT	ksp1-KD	OK	291.419	576.909	0.985248	4.86282	5e-05	0.000294606	yes	1.97965	Yes
YJR097W_mRNA	YJR097W	YJR097W	.	.	X:612412-612931	WT	ksp1-KD	OK	67.1941	132.802	0.982874	6.0648	5e-05	0.000294606	yes	1.9764	Yes
YIL152W_mRNA	YIL152W	YIL152W	.	.	IX:56544-57252	WT	ksp1-KD	OK	25.3944	50.1832	0.982693	4.89429	5e-05	0.000294606	yes	1.97615	Yes
YOL027C_mRNA	YOL027C	YOL027C	.	.	XV:272002-273724	WT	ksp1-KD	OK	54.9263	108.493	0.982038	6.39345	5e-05	0.000294606	yes	1.97525	Yes
YOL162W_mRNA	YOL162W	YOL162W	.	.	XV:10118-10766	WT	ksp1-KD	OK	25.5305	50.3441	0.979602	8.30771	5e-05	0.000294606	yes	1.97192	Yes
YEL059W_mRNA	YEL059W	YEL059W	.	.	V:42651-42960	WT	ksp1-KD	OK	14.1251	27.8264	0.978189	19.2862	5e-05	0.000294606	yes	1.96999	Yes
YFR047C_mRNA	YFR047C	YFR047C	.	.	VI:244278-245166	WT	ksp1-KD	OK	487.456	958.911	0.976125	10.0614	5e-05	0.000294606	yes	1.96717	Yes
YDL059C_mRNA	YDL059C	YDL059C	.	.	IV:344236-344953	WT	ksp1-KD	OK	43.5325	85.6251	0.975941	4.44393	5e-05	0.000294606	yes	1.96692	Yes
YPL212C_mRNA	YPL212C	YPL212C	.	.	XVI:151514-153149	WT	ksp1-KD	OK	51.8611	101.852	0.973747	9.03015	5e-05	0.000294606	yes	1.96393	Yes
YGR155W_mRNA	YGR155W	YGR155W	.	.	VII:798542-800066	WT	ksp1-KD	OK	378.068	742.026	0.972825	3.34888	5e-05	0.000294606	yes	1.96268	Yes
YOL118C_mRNA	YOL118C	YOL118C	.	.	XV:96607-96916	WT	ksp1-KD	OK	13.0025	25.43	0.96774	2.7996	0.0001	0.000557854	yes	1.95577	Yes
YDL215C_mRNA	YDL215C	YDL215C	.	.	IV:70639-73918	WT	ksp1-KD	OK	165.353	323.135	0.966591	3.09981	5e-05	0.000294606	yes	1.95422	Yes
YPL202C_mRNA	YPL202C	YPL202C	.	.	XVI:168087-169338	WT	ksp1-KD	OK	37.2096	72.6747	0.96578	8.82134	5e-05	0.000294606	yes	1.95312	Yes
YLL018C-A_mRNA	YLL018C-A	YLL018C-A	.	.	XII:108675-108972	WT	ksp1-KD	OK	198.937	387.889	0.963336	4.14131	5e-05	0.000294606	yes	1.94981	Yes
YKL133C_mRNA	YKL133C	YKL133C	.	.	XI:191678-193070	WT	ksp1-KD	OK	15.5317	30.2817	0.963229	5.78508	5e-05	0.000294606	yes	1.94967	Yes
YMR042W_mRNA	YMR042W	YMR042W	.	.	XIII:352602-353136	WT	ksp1-KD	OK	22.9765	44.7606	0.962074	6.21239	5e-05	0.000294606	yes	1.94811	Yes
YBR244W_mRNA	YBR244W	YBR244W	.	.	II:707527-708016	WT	ksp1-KD	OK	70.3428	136.991	0.961602	4.30759	5e-05	0.000294606	yes	1.94747	Yes
YOR323C_mRNA	YOR323C	YOR323C	.	.	XV:921534-922905	WT	ksp1-KD	OK	97.7869	189.793	0.956717	4.04996	5e-05	0.000294606	yes	1.94089	Yes
YBR148W_mRNA	YBR148W	YBR148W	.	.	II:537875-539705	WT	ksp1-KD	OK	5.74974	11.1555	0.956182	3.69061	5e-05	0.000294606	yes	1.94017	Yes
YBL018C_mRNA	YBL018C	YBL018C	.	.	II:185997-186474	WT	ksp1-KD	OK	153.665	297.499	0.953097	5.63545	5e-05	0.000294606	yes	1.93602	Yes
YLR193C_mRNA	YLR193C	YLR193C	.	.	XII:540008-540536	WT	ksp1-KD	OK	78.0717	151.104	0.952668	9.52	5e-05	0.000294606	yes	1.93545	Yes
YDR535C_mRNA	YDR535C	YDR535C	.	.	IV:1506605-1507362	WT	ksp1-KD	OK	1.37167	2.65139	0.950817	1.97252	0.00085	0.00373758	yes	1.93297	Yes
YIR017W-A_mRNA	YIR017W-A	YIR017W-A	.	.	IX:383555-384165	WT	ksp1-KD	OK	20.9855	40.5556	0.950505	5.31147	5e-05	0.000294606	yes	1.93255	Yes
YJR010W_mRNA	YJR010W	YJR010W	.	.	X:456238-457774	WT	ksp1-KD	OK	38.1506	73.6923	0.949808	5.32259	5e-05	0.000294606	yes	1.93162	Yes
YKL096W_mRNA	YKL096W	YKL096W	.	.	XI:261131-261851	WT	ksp1-KD	OK	12.7893	24.6793	0.948364	3.74433	5e-05	0.000294606	yes	1.92968	Yes
YIL092W_mRNA	YIL092W	YIL092W	.	.	IX:189065-190967	WT	ksp1-KD	OK	25.3571	48.8632	0.946357	5.59336	5e-05	0.000294606	yes	1.927	Yes
YPR168W_mRNA	YPR168W	YPR168W	.	.	XVI:878075-878549	WT	ksp1-KD	OK	82.5596	159.086	0.9463	4.57754	5e-05	0.000294606	yes	1.92692	Yes
YDL241W_mRNA	YDL241W	YDL241W	.	.	IV:20634-21006	WT	ksp1-KD	OK	16.1848	31.1763	0.945807	3.07813	5e-05	0.000294606	yes	1.92627	Yes
YKL001C_mRNA	YKL001C	YKL001C	.	.	XI:438776-439385	WT	ksp1-KD	OK	172.466	331.242	0.941573	4.17673	5e-05	0.000294606	yes	1.92062	Yes
YNL115C_mRNA	YNL115C	YNL115C	.	.	XIV:410118-412053	WT	ksp1-KD	OK	36.6129	70.2868	0.940901	6.10469	5e-05	0.000294606	yes	1.91973	Yes
YFL053W_mRNA	YFL053W	YFL053W	.	.	VI:23422-25198	WT	ksp1-KD	OK	4.34194	8.33218	0.940354	3.32975	5e-05	0.000294606	yes	1.919	Yes
YJL144W_mRNA	YJL144W	YJL144W	.	.	X:146358-146673	WT	ksp1-KD	OK	234.129	449.065	0.939623	6.32262	5e-05	0.000294606	yes	1.91803	Yes
YGR097W_mRNA	YGR097W	YGR097W	.	.	VII:678694-682135	WT	ksp1-KD	OK	54.372	104.259	0.939231	3.46172	5e-05	0.000294606	yes	1.91751	Yes
YHR024C_mRNA	YHR024C	YHR024C	.	.	VIII:157743-159192	WT	ksp1-KD	OK	56.6454	108.517	0.937893	4.37299	5e-05	0.000294606	yes	1.91573	Yes
YDR527W_mRNA	YDR527W	YDR527W	.	.	IV:1491074-1492413	WT	ksp1-KD	OK	67.7051	129.421	0.934732	5.30569	5e-05	0.000294606	yes	1.91154	Yes
snR11_snoRNA	snR11	snR11	.	.	XIII:652274-652532	WT	ksp1-KD	OK	97.097	185.371	0.932921	3.69706	5e-05	0.000294606	yes	1.90914	Yes
YEL059C-A_mRNA	YEL059C-A	YEL059C-A	.	.	V:42399-42624	WT	ksp1-KD	OK	167.762	320.062	0.931934	3.53361	5e-05	0.000294606	yes	1.90783	Yes
YER096W_mRNA	YER096W	YER096W	.	.	V:351697-353236	WT	ksp1-KD	OK	16.2131	30.9048	0.930671	5.05831	5e-05	0.000294606	yes	1.90616	Yes
YJL127W-A_mRNA	YJL127W-A	YJL127W-A	.	.	X:180193-180310	WT	ksp1-KD	OK	155.678	296.473	0.929338	2.02781	0.0035	0.012423	yes	1.9044	Yes
YHR216W_mRNA	YHR216W	YHR216W	.	.	VIII:554395-555967	WT	ksp1-KD	OK	33.0061	62.8547	0.929288	4.7201	5e-05	0.000294606	yes	1.90434	Yes
YMR169C_mRNA	YMR169C	YMR169C	.	.	XIII:599351-600872	WT	ksp1-KD	OK	12.3005	23.4184	0.928932	5.47546	5e-05	0.000294606	yes	1.90387	Yes
YER163C_mRNA	YER163C	YER163C	.	.	V:503083-503782	WT	ksp1-KD	OK	35.4197	67.4137	0.928489	4.22457	5e-05	0.000294606	yes	1.90328	Yes
YBR262C_mRNA	YBR262C	YBR262C	.	.	II:735719-736040	WT	ksp1-KD	OK	672.271	1277.84	0.926589	8.88417	5e-05	0.000294606	yes	1.90078	Yes
YCL048W-A_mRNA	YCL048W-A	YCL048W-A	.	.	III:41487-41727	WT	ksp1-KD	OK	709.325	1347.44	0.925705	7.47252	5e-05	0.000294606	yes	1.89961	Yes
YLL027W_mRNA	YLL027W	YLL027W	.	.	XII:87402-88155	WT	ksp1-KD	OK	188.525	358.089	0.925561	4.82207	5e-05	0.000294606	yes	1.89942	Yes
YJR073C_mRNA	YJR073C	YJR073C	.	.	X:572314-572935	WT	ksp1-KD	OK	725.562	1377.35	0.924721	3.72311	5e-05	0.000294606	yes	1.89832	Yes
YJL205C_mRNA	YJL205C	YJL205C	.	.	X:50138-50443	WT	ksp1-KD	OK	295.982	561.859	0.924698	2.97071	5e-05	0.000294606	yes	1.89829	Yes
YDR133C_mRNA	YDR133C	YDR133C	.	.	IV:720961-721297	WT	ksp1-KD	OK	3846.45	7300.08	0.924382	7.59717	5e-05	0.000294606	yes	1.89787	Yes
YHR199C-A_mRNA	YHR199C-A	YHR199C-A	.	.	VIII:498570-498859	WT	ksp1-KD	OK	122.123	231.07	0.919992	3.01854	5e-05	0.000294606	yes	1.8921	Yes
YBR167C_mRNA	YBR167C	YBR167C	.	.	II:571467-571890	WT	ksp1-KD	OK	76.3133	144.212	0.918186	4.45031	5e-05	0.000294606	yes	1.88974	Yes
YCR020W-B_mRNA	YCR020W-B	YCR020W-B	.	.	III:155319-155556	WT	ksp1-KD	OK	259.947	490.16	0.915036	3.51258	5e-05	0.000294606	yes	1.88562	Yes
YGR029W_mRNA	YGR029W	YGR029W	.	.	VII:543552-544205	WT	ksp1-KD	OK	70.9936	133.625	0.912432	12.7324	5e-05	0.000294606	yes	1.88222	Yes
YPL269W_mRNA	YPL269W	YPL269W	.	.	XVI:33012-34947	WT	ksp1-KD	OK	20.3106	38.2024	0.911428	4.39967	5e-05	0.000294606	yes	1.88091	Yes
YMR195W_mRNA	YMR195W	YMR195W	.	.	XIII:654033-654417	WT	ksp1-KD	OK	241.237	453.126	0.909462	5.57599	5e-05	0.000294606	yes	1.87834	Yes
YKL097C_mRNA	YKL097C	YKL097C	.	.	XI:258502-258913	WT	ksp1-KD	OK	1.12132	2.10526	0.908808	6.79028	0.0025	0.00936455	yes	1.87749	Yes
YGL188C-A_mRNA	YGL188C-A	YGL188C-A	.	.	VII:148823-148964	WT	ksp1-KD	OK	168.514	316.305	0.908448	1.93154	0.00295	0.0107226	yes	1.87703	Yes
YLR239C_mRNA	YLR239C	YLR239C	.	.	XII:616331-617318	WT	ksp1-KD	OK	28.5372	53.5038	0.906798	4.24173	5e-05	0.000294606	yes	1.87488	Yes
YJL127C-B_mRNA	YJL127C-B	YJL127C-B	.	.	X:181550-181709	WT	ksp1-KD	OK	787.426	1476.11	0.906584	5.00476	5e-05	0.000294606	yes	1.8746	Yes
YDL025C_mRNA	YDL025C	YDL025C	.	.	IV:405343-407206	WT	ksp1-KD	OK	21.9515	41.1268	0.905756	6.32407	5e-05	0.000294606	yes	1.87353	Yes
YNL130C_mRNA	YNL130C	YNL130C	.	.	XIV:379557-380831	WT	ksp1-KD	OK	100.711	188.556	0.904777	3.84454	5e-05	0.000294606	yes	1.87226	Yes
YGR142W_mRNA	YGR142W	YGR142W	.	.	VII:772453-773686	WT	ksp1-KD	OK	90.0097	168.389	0.903648	4.93702	5e-05	0.000294606	yes	1.87079	Yes
YAR073W_mRNA	YAR073W	YAR073W	.	.	I:227741-229317	WT	ksp1-KD	OK	2.35149	4.39805	0.903288	2.45009	0.00015	0.000804996	yes	1.87032	Yes
YBR044C_mRNA	YBR044C	YBR044C	.	.	II:324340-326059	WT	ksp1-KD	OK	23.1294	43.2591	0.903278	4.31158	5e-05	0.000294606	yes	1.87031	Yes
YNL086W_mRNA	YNL086W	YNL086W	.	.	XIV:466333-466642	WT	ksp1-KD	OK	83.2838	155.758	0.903199	3.52612	5e-05	0.000294606	yes	1.87021	Yes
YHR048W_mRNA	YHR048W	YHR048W	.	.	VIII:204606-206151	WT	ksp1-KD	OK	22.2344	41.5415	0.901761	4.46596	5e-05	0.000294606	yes	1.86835	Yes
YJR131W_mRNA	YJR131W	YJR131W	.	.	X:667643-669293	WT	ksp1-KD	OK	24.4016	45.4451	0.897148	4.63768	5e-05	0.000294606	yes	1.86238	Yes
YDR403W_mRNA	YDR403W	YDR403W	.	.	IV:1274601-1276212	WT	ksp1-KD	OK	3.74658	6.97672	0.896975	3.21798	5e-05	0.000294606	yes	1.86216	Yes
YER184C_mRNA	YER184C	YER184C	.	.	V:556295-558680	WT	ksp1-KD	OK	14.5452	27.0759	0.896469	4.21588	5e-05	0.000294606	yes	1.8615	Yes
YEL009C-A_mRNA	YEL009C-A	YEL009C-A	.	.	V:136278-136778	WT	ksp1-KD	OK	1.07395	1.99467	0.893221	1.60152	0.0112	0.0328618	yes	1.85732	Yes
YJR008W_mRNA	YJR008W	YJR008W	.	.	X:452429-453446	WT	ksp1-KD	OK	93.065	172.794	0.892746	4.03489	5e-05	0.000294606	yes	1.85671	Yes
YDR408C_mRNA	YDR408C	YDR408C	.	.	IV:1288214-1288859	WT	ksp1-KD	OK	93.575	173.662	0.892087	4.1215	5e-05	0.000294606	yes	1.85586	Yes
YDR040C_mRNA	YDR040C	YDR040C	.	.	IV:535191-538467	WT	ksp1-KD	OK	4.19989	7.79311	0.891847	3.52924	5e-05	0.000294606	yes	1.85555	Yes
YCL001W-B_mRNA	YCL001W-B	YCL001W-B	.	.	III:113769-114024	WT	ksp1-KD	OK	67.1342	124.43	0.890216	2.60377	5e-05	0.000294606	yes	1.85345	Yes
YPR149W_mRNA	YPR149W	YPR149W	.	.	XVI:829917-830439	WT	ksp1-KD	OK	1060.13	1964.41	0.88985	3.93191	5e-05	0.000294606	yes	1.85298	Yes
YLR132C_mRNA	YLR132C	YLR132C	.	.	XII:407282-408155	WT	ksp1-KD	OK	7.35794	13.6299	0.889403	3.09938	5e-05	0.000294606	yes	1.85241	Yes
YKL068W-A_mRNA	YKL068W-A	YKL068W-A	.	.	XI:309205-309442	WT	ksp1-KD	OK	299.772	554.62	0.887636	3.96612	5e-05	0.000294606	yes	1.85014	Yes
YJL161W_mRNA	YJL161W	YJL161W	.	.	X:117244-117787	WT	ksp1-KD	OK	36.9959	68.4277	0.887213	3.99169	5e-05	0.000294606	yes	1.8496	Yes
YGL056C_mRNA	YGL056C	YGL056C	.	.	VII:396034-397618	WT	ksp1-KD	OK	42.7454	79.0607	0.88719	4.07323	5e-05	0.000294606	yes	1.84957	Yes
YLR364W_mRNA	YLR364W	YLR364W	.	.	XII:854061-854391	WT	ksp1-KD	OK	65.478	120.82	0.88378	3.64351	5e-05	0.000294606	yes	1.8452	Yes
YPR193C_mRNA	YPR193C	YPR193C	.	.	XVI:922908-923379	WT	ksp1-KD	OK	276.261	509.555	0.883209	7.63919	5e-05	0.000294606	yes	1.84447	Yes
YDR038C_mRNA	YDR038C	YDR038C	.	.	IV:527421-530697	WT	ksp1-KD	OK	1.98327	3.65739	0.88293	2.97473	5e-05	0.000294606	yes	1.84412	Yes
YAL062W_mRNA	YAL062W	YAL062W	.	.	I:31566-32940	WT	ksp1-KD	OK	27.0637	49.8472	0.881155	4.10463	5e-05	0.000294606	yes	1.84185	Yes
YLR226W_mRNA	YLR226W	YLR226W	.	.	XII:589353-590541	WT	ksp1-KD	OK	28.7594	52.9685	0.881102	6.23737	5e-05	0.000294606	yes	1.84178	Yes
YNL012W_mRNA	YNL012W	YNL012W	.	.	XIV:609685-611665	WT	ksp1-KD	OK	14.1514	26.056	0.880671	4.14456	5e-05	0.000294606	yes	1.84123	Yes
YER185W_mRNA	YER185W	YER185W	.	.	V:559453-560365	WT	ksp1-KD	OK	15.0528	27.6831	0.878973	3.46539	5e-05	0.000294606	yes	1.83907	Yes
YKL059C_mRNA	YKL059C	YKL059C	.	.	XI:328117-329443	WT	ksp1-KD	OK	18.8688	34.6952	0.878738	4.76146	5e-05	0.000294606	yes	1.83877	Yes
YOL048C_mRNA	YOL048C	YOL048C	.	.	XV:240203-241310	WT	ksp1-KD	OK	57.5154	105.696	0.877906	4.56969	5e-05	0.000294606	yes	1.83771	Yes
YBR241C_mRNA	YBR241C	YBR241C	.	.	II:702588-704055	WT	ksp1-KD	OK	55.4419	101.736	0.875775	3.88597	5e-05	0.000294606	yes	1.83499	Yes
YKL106W_mRNA	YKL106W	YKL106W	.	.	XI:237535-238891	WT	ksp1-KD	OK	107.375	196.996	0.875504	4.8995	5e-05	0.000294606	yes	1.83465	Yes
RNA170_ncRNA	RNA170	RNA170	.	.	XIII:667287-667456	WT	ksp1-KD	OK	48.7075	89.3483	0.875298	2.01811	0.00085	0.00373758	yes	1.83439	Yes
YMR196W_mRNA	YMR196W	YMR196W	.	.	XIII:655075-658342	WT	ksp1-KD	OK	63.1994	115.9	0.874903	3.30147	5e-05	0.000294606	yes	1.83388	Yes
YLR413W_mRNA	YLR413W	YLR413W	.	.	XII:951155-953183	WT	ksp1-KD	OK	12.1612	22.2934	0.874323	4.42652	5e-05	0.000294606	yes	1.83315	Yes
YJL184W_mRNA	YJL184W	YJL184W	.	.	X:83447-83819	WT	ksp1-KD	OK	419.214	768.11	0.873627	7.72356	5e-05	0.000294606	yes	1.83226	Yes
YER180C-A_mRNA	YER180C-A	YER180C-A	.	.	V:550864-551122	WT	ksp1-KD	OK	29.4121	53.7992	0.871173	2.6967	5e-05	0.000294606	yes	1.82915	Yes
YGL186C_mRNA	YGL186C	YGL186C	.	.	VII:151036-152776	WT	ksp1-KD	OK	117.689	215.186	0.870603	3.57521	5e-05	0.000294606	yes	1.82843	Yes
YMR315W_mRNA	YMR315W	YMR315W	.	.	XIII:902799-903849	WT	ksp1-KD	OK	351.815	642.842	0.869646	3.34392	5e-05	0.000294606	yes	1.82721	Yes
YIR005W_mRNA	YIR005W	YIR005W	.	.	IX:364888-365335	WT	ksp1-KD	OK	232.787	425.111	0.86883	5.53375	5e-05	0.000294606	yes	1.82618	Yes
YNL187W_mRNA	YNL187W	YNL187W	.	.	XIV:287993-289067	WT	ksp1-KD	OK	21.6108	39.4393	0.867883	4.10099	5e-05	0.000294606	yes	1.82498	Yes
YGR025W_mRNA	YGR025W	YGR025W	.	.	VII:532638-532941	WT	ksp1-KD	OK	2.39773	4.37491	0.867585	1.47707	0.01565	0.0435213	yes	1.82461	Yes
YHR022C_mRNA	YHR022C	YHR022C	.	.	VIII:149224-150345	WT	ksp1-KD	OK	5.21637	9.51427	0.867048	2.32932	0.00025	0.00126538	yes	1.82393	Yes
YHR163W_mRNA	YHR163W	YHR163W	.	.	VIII:423723-424473	WT	ksp1-KD	OK	80.7046	147.065	0.865732	4.07342	5e-05	0.000294606	yes	1.82226	Yes
YOR360C_mRNA	YOR360C	YOR360C	.	.	XV:1013240-1014821	WT	ksp1-KD	OK	83.6155	152.269	0.864778	3.63151	5e-05	0.000294606	yes	1.82106	Yes
YKL151C_mRNA	YKL151C	YKL151C	.	.	XI:164916-165930	WT	ksp1-KD	OK	372.725	676.38	0.859725	4.92512	5e-05	0.000294606	yes	1.81469	Yes
YDR380W_mRNA	YDR380W	YDR380W	.	.	IV:1234217-1236125	WT	ksp1-KD	OK	25.1512	45.6402	0.859677	4.04945	5e-05	0.000294606	yes	1.81463	Yes
YDR478W_mRNA	YDR478W	YDR478W	.	.	IV:1414574-1415171	WT	ksp1-KD	OK	24.5147	44.3573	0.855526	3.26257	5e-05	0.000294606	yes	1.80942	Yes
YDL199C_mRNA	YDL199C	YDL199C	.	.	IV:101289-103353	WT	ksp1-KD	OK	13.0256	23.5666	0.855394	6.40084	5e-05	0.000294606	yes	1.80925	Yes
YJR112W_mRNA	YJR112W	YJR112W	.	.	X:637029-637635	WT	ksp1-KD	OK	80.5376	145.693	0.855195	4.80681	5e-05	0.000294606	yes	1.809	Yes
YEL063C_mRNA	YEL063C	YEL063C	.	.	V:31693-33466	WT	ksp1-KD	OK	232.028	419.601	0.854721	2.81658	5e-05	0.000294606	yes	1.80841	Yes
YBR067C_mRNA	YBR067C	YBR067C	.	.	II:372102-372735	WT	ksp1-KD	OK	103.04	185.751	0.850168	5.24448	5e-05	0.000294606	yes	1.80271	Yes
YDR230W_mRNA	YDR230W	YDR230W	.	.	IV:926222-926910	WT	ksp1-KD	OK	10.8152	19.4624	0.84763	3.18333	0.0067	0.0214816	yes	1.79954	Yes
snR31_snoRNA	snR31	snR31	.	.	XV:841957-842182	WT	ksp1-KD	OK	47.6084	85.6257	0.846828	2.43824	5e-05	0.000294606	yes	1.79854	Yes
YGR153W_mRNA	YGR153W	YGR153W	.	.	VII:796091-796745	WT	ksp1-KD	OK	36.4794	65.5756	0.846079	4.05032	5e-05	0.000294606	yes	1.79761	Yes
YKL138C-A_mRNA	YKL138C-A	YKL138C-A	.	.	XI:184802-185012	WT	ksp1-KD	OK	322.21	577.52	0.84187	3.22004	5e-05	0.000294606	yes	1.79237	Yes
YHL036W_mRNA	YHL036W	YHL036W	.	.	VIII:26240-27881	WT	ksp1-KD	OK	44.5671	79.8716	0.841704	4.26567	5e-05	0.000294606	yes	1.79217	Yes
YML076C_mRNA	YML076C	YML076C	.	.	XIII:112512-115347	WT	ksp1-KD	OK	13.5878	24.3347	0.84071	6.84568	5e-05	0.000294606	yes	1.79093	Yes
YLR063W_mRNA	YLR063W	YLR063W	.	.	XII:264156-265254	WT	ksp1-KD	OK	17.5273	31.3748	0.840005	3.94327	5e-05	0.000294606	yes	1.79006	Yes
YNL125C_mRNA	YNL125C	YNL125C	.	.	XIV:390145-392167	WT	ksp1-KD	OK	24.3653	43.5867	0.839058	4.0254	5e-05	0.000294606	yes	1.78888	Yes
YER135C_mRNA	YER135C	YER135C	.	.	V:437951-438344	WT	ksp1-KD	OK	3.31941	5.92914	0.836895	2.50501	0.0024	0.00903685	yes	1.7862	Yes
YHL042W_mRNA	YHL042W	YHL042W	.	.	VIII:15666-16119	WT	ksp1-KD	OK	7.87666	14.0678	0.836742	4.63371	5e-05	0.000294606	yes	1.78601	Yes
YER042W_mRNA	YER042W	YER042W	.	.	V:234936-235491	WT	ksp1-KD	OK	656.26	1171.42	0.835919	4.27656	5e-05	0.000294606	yes	1.78499	Yes
YDR256C_mRNA	YDR256C	YDR256C	.	.	IV:968132-969680	WT	ksp1-KD	OK	28.6692	51.1713	0.835837	4.12135	5e-05	0.000294606	yes	1.78489	Yes
YBR293W_mRNA	YBR293W	YBR293W	.	.	II:787005-788430	WT	ksp1-KD	OK	41.7207	74.3716	0.833987	5.88418	5e-05	0.000294606	yes	1.7826	Yes
YOR347C_mRNA	YOR347C	YOR347C	.	.	XV:984941-986462	WT	ksp1-KD	OK	22.5285	40.1374	0.833192	3.95014	5e-05	0.000294606	yes	1.78162	Yes
YDR341C_mRNA	YDR341C	YDR341C	.	.	IV:1151802-1153626	WT	ksp1-KD	OK	227.76	405.629	0.832649	2.96957	5e-05	0.000294606	yes	1.78095	Yes
YDR034C_mRNA	YDR034C	YDR034C	.	.	IV:509736-512109	WT	ksp1-KD	OK	51.4991	91.6156	0.831047	3.47196	5e-05	0.000294606	yes	1.77898	Yes
YAL015C_mRNA	YAL015C	YAL015C	.	.	I:126902-128102	WT	ksp1-KD	OK	48.8385	86.8184	0.829984	4.58711	5e-05	0.000294606	yes	1.77767	Yes
YIL055C_mRNA	YIL055C	YIL055C	.	.	IX:252041-253925	WT	ksp1-KD	OK	5.2089	9.25039	0.828536	4.18853	5e-05	0.000294606	yes	1.77588	Yes
YDR009W_mRNA	YDR009W	YDR009W	.	.	IV:463433-464996	WT	ksp1-KD	OK	4.31229	7.65809	0.828531	3.17767	5e-05	0.000294606	yes	1.77588	Yes
YDR076W_mRNA	YDR076W	YDR076W	.	.	IV:598467-599688	WT	ksp1-KD	OK	35.2585	62.5934	0.828038	4.25151	5e-05	0.000294606	yes	1.77527	Yes
YPL026C_mRNA	YPL026C	YPL026C	.	.	XVI:500674-502183	WT	ksp1-KD	OK	63.7485	113.164	0.827952	3.65634	5e-05	0.000294606	yes	1.77516	Yes
YNL009W_mRNA	YNL009W	YNL009W	.	.	XIV:614820-616083	WT	ksp1-KD	OK	18.925	33.591	0.827782	4.36656	5e-05	0.000294606	yes	1.77495	Yes
YKR014C_mRNA	YKR014C	YKR014C	.	.	XI:465366-466071	WT	ksp1-KD	OK	253.286	449.153	0.826438	3.9006	5e-05	0.000294606	yes	1.7733	Yes
YPL099C_mRNA	YPL099C	YPL099C	.	.	XVI:363519-364068	WT	ksp1-KD	OK	58.0868	102.988	0.826187	3.6678	5e-05	0.000294606	yes	1.77299	Yes
YER039C_mRNA	YER039C	YER039C	.	.	V:228450-229205	WT	ksp1-KD	OK	25.3069	44.8475	0.8255	3.62869	5e-05	0.000294606	yes	1.77215	Yes
YLR327C_mRNA	YLR327C	YLR327C	.	.	XII:783126-783387	WT	ksp1-KD	OK	3774.34	6686.94	0.825123	3.29497	5e-05	0.000294606	yes	1.77169	Yes
YNL276C_mRNA	YNL276C	YNL276C	.	.	XIV:117348-118826	WT	ksp1-KD	OK	98.2366	174.012	0.824853	1.82999	0.00325	0.0116373	yes	1.77135	Yes
YGL248W_mRNA	YGL248W	YGL248W	.	.	VII:35652-36762	WT	ksp1-KD	OK	77.9728	138.051	0.824157	5.03273	5e-05	0.000294606	yes	1.7705	Yes
YOR339C_mRNA	YOR339C	YOR339C	.	.	XV:958361-958832	WT	ksp1-KD	OK	25.3604	44.8319	0.821946	4.43978	5e-05	0.000294606	yes	1.76779	Yes
YIL102C-A_mRNA	YIL102C-A	YIL102C-A	.	.	IX:173364-173592	WT	ksp1-KD	OK	62.0853	109.651	0.820602	7.98195	5e-05	0.000294606	yes	1.76614	Yes
YOL156W_mRNA	YOL156W	YOL156W	.	.	XV:25272-26976	WT	ksp1-KD	OK	2.0841	3.68012	0.820328	3.4999	5e-05	0.000294606	yes	1.76581	Yes
YCR063W_mRNA	YCR063W	YCR063W	.	.	III:228094-228791	WT	ksp1-KD	OK	23.6197	41.6133	0.817056	3.06453	5e-05	0.000294606	yes	1.76181	Yes
YBL098W_mRNA	YBL098W	YBL098W	.	.	II:39144-40527	WT	ksp1-KD	OK	47.4687	83.5909	0.81637	3.87438	5e-05	0.000294606	yes	1.76097	Yes
YMR174C_mRNA	YMR174C	YMR174C	.	.	XIII:610158-610365	WT	ksp1-KD	OK	1266.23	2226.85	0.814461	5.06771	5e-05	0.000294606	yes	1.75864	Yes
YNL274C_mRNA	YNL274C	YNL274C	.	.	XIV:121117-122170	WT	ksp1-KD	OK	200.593	352.387	0.812894	3.2259	5e-05	0.000294606	yes	1.75673	Yes
YEL069C_mRNA	YEL069C	YEL069C	.	.	V:21536-23231	WT	ksp1-KD	OK	1.55184	2.72541	0.812499	2.17749	0.00025	0.00126538	yes	1.75625	Yes
YDR055W_mRNA	YDR055W	YDR055W	.	.	IV:563526-564861	WT	ksp1-KD	OK	141.607	248.65	0.812224	3.37885	5e-05	0.000294606	yes	1.75592	Yes
YIL003W_mRNA	YIL003W	YIL003W	.	.	IX:349121-350003	WT	ksp1-KD	OK	84.8105	148.788	0.810941	4.19786	5e-05	0.000294606	yes	1.75436	Yes
SRG1_ncRNA	SRG1	SRG1	.	.	V:322211-324095	WT	ksp1-KD	OK	35.6808	62.5922	0.810834	1.49585	0.01245	0.0359771	yes	1.75423	Yes
YGL098W_mRNA	YGL098W	YGL098W	.	.	VII:317341-318079	WT	ksp1-KD	OK	66.7998	117.175	0.810756	3.99294	5e-05	0.000294606	yes	1.75413	Yes
YMR135C_mRNA	YMR135C	YMR135C	.	.	XIII:538688-540444	WT	ksp1-KD	OK	44.4973	78.0529	0.810734	3.60978	5e-05	0.000294606	yes	1.7541	Yes
YIL096C_mRNA	YIL096C	YIL096C	.	.	IX:182116-183127	WT	ksp1-KD	OK	28.8934	50.6528	0.809903	4.46753	5e-05	0.000294606	yes	1.75309	Yes
YFR023W_mRNA	YFR023W	YFR023W	.	.	VI:199873-201709	WT	ksp1-KD	OK	1.70082	2.98139	0.80976	2.39442	5e-05	0.000294606	yes	1.75292	Yes
YJL213W_mRNA	YJL213W	YJL213W	.	.	X:32162-33158	WT	ksp1-KD	OK	72.4486	126.774	0.807229	3.82102	5e-05	0.000294606	yes	1.74985	Yes
YJL185C_mRNA	YJL185C	YJL185C	.	.	X:82094-82976	WT	ksp1-KD	OK	24.452	42.7497	0.80596	3.64749	5e-05	0.000294606	yes	1.74831	Yes
YCR010C_mRNA	YCR010C	YCR010C	.	.	III:132272-133124	WT	ksp1-KD	OK	6.0269	10.5343	0.805602	2.55577	5e-05	0.000294606	yes	1.74787	Yes
YHR191C_mRNA	YHR191C	YHR191C	.	.	VIII:486229-486631	WT	ksp1-KD	OK	269.916	470.74	0.802419	7.81422	5e-05	0.000294606	yes	1.74402	Yes
YGR016W_mRNA	YGR016W	YGR016W	.	.	VII:522260-522833	WT	ksp1-KD	OK	44.3963	77.4027	0.801944	5.29352	5e-05	0.000294606	yes	1.74345	Yes
YOR027W_mRNA	YOR027W	YOR027W	.	.	XV:381052-382822	WT	ksp1-KD	OK	207.283	360.745	0.799377	2.9423	5e-05	0.000294606	yes	1.74035	Yes
YFR042W_mRNA	YFR042W	YFR042W	.	.	VI:238457-239060	WT	ksp1-KD	OK	54.6532	95.038	0.798197	3.78437	5e-05	0.000294606	yes	1.73893	Yes
YBR180W_mRNA	YBR180W	YBR180W	.	.	II:589740-591459	WT	ksp1-KD	OK	1.68693	2.93342	0.798183	2.395	5e-05	0.000294606	yes	1.73891	Yes
YNL116W_mRNA	YNL116W	YNL116W	.	.	XIV:408340-409909	WT	ksp1-KD	OK	37.0288	64.3467	0.79722	4.80635	5e-05	0.000294606	yes	1.73775	Yes
YLR377C_mRNA	YLR377C	YLR377C	.	.	XII:873745-874792	WT	ksp1-KD	OK	9.01608	15.6662	0.797087	2.79868	5e-05	0.000294606	yes	1.73759	Yes
YOR334W_mRNA	YOR334W	YOR334W	.	.	XV:944540-946008	WT	ksp1-KD	OK	15.5049	26.9204	0.795974	4.24714	5e-05	0.000294606	yes	1.73625	Yes
YHR104W_mRNA	YHR104W	YHR104W	.	.	VIII:323408-324392	WT	ksp1-KD	OK	136.759	236.916	0.792743	3.75396	5e-05	0.000294606	yes	1.73237	Yes
YOR213C_mRNA	YOR213C	YOR213C	.	.	XV:744534-745281	WT	ksp1-KD	OK	53.6433	92.7608	0.790119	3.85612	5e-05	0.000294606	yes	1.72922	Yes
YOR225W_mRNA	YOR225W	YOR225W	.	.	XV:761391-762084	WT	ksp1-KD	OK	41.0193	70.8418	0.788297	1.57823	0.0122	0.0353332	yes	1.72703	Yes
YJL105W_mRNA	YJL105W	YJL105W	.	.	X:225054-226737	WT	ksp1-KD	OK	6.70825	11.5846	0.788195	3.35749	5e-05	0.000294606	yes	1.72691	Yes
YOR114W_mRNA	YOR114W	YOR114W	.	.	XV:537569-538454	WT	ksp1-KD	OK	14.0369	24.2385	0.788078	3.68217	5e-05	0.000294606	yes	1.72677	Yes
YHR087W_mRNA	YHR087W	YHR087W	.	.	VIII:280819-281155	WT	ksp1-KD	OK	183.725	317.202	0.787855	4.08834	5e-05	0.000294606	yes	1.72651	Yes
YGR018C_mRNA	YGR018C	YGR018C	.	.	VII:523786-524694	WT	ksp1-KD	OK	63.6117	109.762	0.787017	2.59968	0.00105	0.0044806	yes	1.7255	Yes
YBR056W_mRNA	YBR056W	YBR056W	.	.	II:347878-349384	WT	ksp1-KD	OK	92.7154	159.798	0.785372	3.51548	5e-05	0.000294606	yes	1.72354	Yes
YLL009C_mRNA	YLL009C	YLL009C	.	.	XII:131204-131414	WT	ksp1-KD	OK	469.292	808.745	0.785197	3.84392	5e-05	0.000294606	yes	1.72333	Yes
YIL163C_mRNA	YIL163C	YIL163C	.	.	IX:36898-37252	WT	ksp1-KD	OK	87.6199	150.762	0.782941	3.6155	5e-05	0.000294606	yes	1.72063	Yes
YMR240C_mRNA	YMR240C	YMR240C	.	.	XIII:749929-751240	WT	ksp1-KD	OK	33.4745	57.5097	0.780743	3.79842	5e-05	0.000294606	yes	1.71802	Yes
YIL074C_mRNA	YIL074C	YIL074C	.	.	IX:221080-222490	WT	ksp1-KD	OK	89.9295	154.424	0.780034	3.53288	5e-05	0.000294606	yes	1.71717	Yes
YLR312C_mRNA	YLR312C	YLR312C	.	.	XII:757636-758833	WT	ksp1-KD	OK	36.463	62.6066	0.779883	4.08814	5e-05	0.000294606	yes	1.71699	Yes
YDR461W_mRNA	YDR461W	YDR461W	.	.	IV:1385175-1385286	WT	ksp1-KD	OK	298.536	512.238	0.778909	3.51898	0.00375	0.0131808	yes	1.71583	Yes
YBL059C-A_mRNA	YBL059C-A	YBL059C-A	.	.	II:110124-110539	WT	ksp1-KD	OK	156.917	269.102	0.778154	4.50658	5e-05	0.000294606	yes	1.71494	Yes
RME3_ncRNA	RME3	RME3	.	.	VII:33097-35212	WT	ksp1-KD	OK	9.63163	16.5126	0.777717	3.3866	5e-05	0.000294606	yes	1.71442	Yes
YFR012W_mRNA	YFR012W	YFR012W	.	.	VI:167887-168496	WT	ksp1-KD	OK	4.14153	7.08963	0.775548	2.14223	0.0003	0.00149174	yes	1.71184	Yes
YNR072W_mRNA	YNR072W	YNR072W	.	.	XIV:772656-774351	WT	ksp1-KD	OK	0.4661	0.797664	0.775142	1.57355	0.00725	0.0230067	yes	1.71136	Yes
YKR049C_mRNA	YKR049C	YKR049C	.	.	XI:526829-527231	WT	ksp1-KD	OK	244.847	418.705	0.774053	3.68251	5e-05	0.000294606	yes	1.71007	Yes
YER015W_mRNA	YER015W	YER015W	.	.	V:182599-186775	WT	ksp1-KD	OK	25.9035	44.2937	0.773953	1.70144	0.005	0.016802	yes	1.70995	Yes
YIL060W_mRNA	YIL060W	YIL060W	.	.	IX:246391-247198	WT	ksp1-KD	OK	24.683	42.1767	0.772927	2.00305	0.00265	0.00978543	yes	1.70873	Yes
YDL133C-A_mRNA	YDL133C-A	YDL133C-A	.	.	IV:221723-221801	WT	ksp1-KD	OK	3264.88	5574.85	0.771904	2.94946	0.00075	0.00336852	yes	1.70752	Yes
YKL062W_mRNA	YKL062W	YKL062W	.	.	XI:323227-325120	WT	ksp1-KD	OK	42.8252	73.113	0.771666	3.59801	5e-05	0.000294606	yes	1.70724	Yes
YPR101W_mRNA	YPR101W	YPR101W	.	.	XVI:730491-731019	WT	ksp1-KD	OK	198.017	337.987	0.771341	6.83934	5e-05	0.000294606	yes	1.70686	Yes
YDL130W-A_mRNA	YDL130W-A	YDL130W-A	.	.	IV:229170-229431	WT	ksp1-KD	OK	773.368	1318.2	0.769348	3.89053	5e-05	0.000294606	yes	1.7045	Yes
YNL014W_mRNA	YNL014W	YNL014W	.	.	XIV:606318-609510	WT	ksp1-KD	OK	12.3506	21.0312	0.767946	3.39725	5e-05	0.000294606	yes	1.70284	Yes
YGL104C_mRNA	YGL104C	YGL104C	.	.	VII:308712-310173	WT	ksp1-KD	OK	17.0712	28.9924	0.764111	3.35782	5e-05	0.000294606	yes	1.69832	Yes
YNL200C_mRNA	YNL200C	YNL200C	.	.	XIV:263712-264453	WT	ksp1-KD	OK	122.818	208.465	0.763279	4.5732	5e-05	0.000294606	yes	1.69734	Yes
YAL060W_mRNA	YAL060W	YAL060W	.	.	I:35154-36303	WT	ksp1-KD	OK	573.221	972.606	0.762764	2.41492	5e-05	0.000294606	yes	1.69674	Yes
YOR062C_mRNA	YOR062C	YOR062C	.	.	XV:442724-443531	WT	ksp1-KD	OK	48.5762	82.4175	0.762701	3.92275	5e-05	0.000294606	yes	1.69666	Yes
YER058W_mRNA	YER058W	YER058W	.	.	V:271767-272091	WT	ksp1-KD	OK	186.27	316.012	0.762586	6.07673	5e-05	0.000294606	yes	1.69653	Yes
YEL058W_mRNA	YEL058W	YEL058W	.	.	V:43251-44925	WT	ksp1-KD	OK	128.461	217.926	0.762506	3.35785	5e-05	0.000294606	yes	1.69643	Yes
YBR155W_mRNA	YBR155W	YBR155W	.	.	II:549770-550928	WT	ksp1-KD	OK	41.7956	70.8558	0.761533	10.6044	5e-05	0.000294606	yes	1.69529	Yes
YDR354W_mRNA	YDR354W	YDR354W	.	.	IV:1184746-1185889	WT	ksp1-KD	OK	88.8456	150.571	0.761074	3.2218	5e-05	0.000294606	yes	1.69475	Yes
YDL171C_mRNA	YDL171C	YDL171C	.	.	IV:149202-155640	WT	ksp1-KD	OK	200.474	339.499	0.759995	2.36041	5e-05	0.000294606	yes	1.69348	Yes
YDR493W_mRNA	YDR493W	YDR493W	.	.	IV:1436216-1436588	WT	ksp1-KD	OK	99.7106	168.723	0.75884	2.95566	5e-05	0.000294606	yes	1.69213	Yes
YMR256C_mRNA	YMR256C	YMR256C	.	.	XIII:778944-779127	WT	ksp1-KD	OK	1080.87	1827.3	0.757515	3.88536	5e-05	0.000294606	yes	1.69058	Yes
YGR067C_mRNA	YGR067C	YGR067C	.	.	VII:622371-624786	WT	ksp1-KD	OK	5.20113	8.78934	0.75693	3.17261	5e-05	0.000294606	yes	1.68989	Yes
YDR041W_mRNA	YDR041W	YDR041W	.	.	IV:539802-540414	WT	ksp1-KD	OK	203.916	344.394	0.756086	3.68622	5e-05	0.000294606	yes	1.6889	Yes
YFL041W-A_mRNA	YFL041W-A	YFL041W-A	.	.	VI:48733-48925	WT	ksp1-KD	OK	111.076	187.144	0.752603	3.16456	5e-05	0.000294606	yes	1.68483	Yes
YKR097W_mRNA	YKR097W	YKR097W	.	.	XI:631151-632801	WT	ksp1-KD	OK	53.6848	90.3951	0.751729	4.3653	5e-05	0.000294606	yes	1.68381	Yes
YDR322C-A_mRNA	YDR322C-A	YDR322C-A	.	.	IV:1112002-1112293	WT	ksp1-KD	OK	1346.27	2265.66	0.750965	6.2237	5e-05	0.000294606	yes	1.68292	Yes
YHR137C-A_mRNA	YHR137C-A	YHR137C-A	.	.	VIII:375708-377250	WT	ksp1-KD	OK	12.7816	21.507	0.750739	2.18407	0.0015	0.00608141	yes	1.68265	Yes
YJL060W_mRNA	YJL060W	YJL060W	.	.	X:323385-324720	WT	ksp1-KD	OK	155.045	260.805	0.75028	2.88538	5e-05	0.000294606	yes	1.68212	Yes
YBL005W_mRNA	YBL005W	YBL005W	.	.	II:217469-220400	WT	ksp1-KD	OK	8.92145	15.0014	0.749743	3.82509	5e-05	0.000294606	yes	1.68149	Yes
YDR379C-A_mRNA	YDR379C-A	YDR379C-A	.	.	IV:1233277-1233517	WT	ksp1-KD	OK	649.943	1092.49	0.749239	3.48457	5e-05	0.000294606	yes	1.68091	Yes
YKL070W_mRNA	YKL070W	YKL070W	.	.	XI:306210-306720	WT	ksp1-KD	OK	49.9463	83.8739	0.747844	3.63456	5e-05	0.000294606	yes	1.67928	Yes
YBR105C_mRNA	YBR105C	YBR105C	.	.	II:450880-451969	WT	ksp1-KD	OK	216.187	362.848	0.747085	3.42446	5e-05	0.000294606	yes	1.6784	Yes
YGL066W_mRNA	YGL066W	YGL066W	.	.	VII:377608-379582	WT	ksp1-KD	OK	23.7719	39.8599	0.745683	3.53931	5e-05	0.000294606	yes	1.67677	Yes
YFL054C_mRNA	YFL054C	YFL054C	.	.	VI:20846-22787	WT	ksp1-KD	OK	18.0368	30.2223	0.744669	3.45602	5e-05	0.000294606	yes	1.67559	Yes
YLR290C_mRNA	YLR290C	YLR290C	.	.	XII:717144-717978	WT	ksp1-KD	OK	84.9951	142.417	0.744668	3.7008	5e-05	0.000294606	yes	1.67559	Yes
YKL107W_mRNA	YKL107W	YKL107W	.	.	XI:236140-237070	WT	ksp1-KD	OK	29.2229	48.9498	0.744205	3.79183	5e-05	0.000294606	yes	1.67505	Yes
YKL192C_mRNA	YKL192C	YKL192C	.	.	XI:80159-80537	WT	ksp1-KD	OK	228.67	382.566	0.742445	3.55796	5e-05	0.000294606	yes	1.67301	Yes
YKR068C_mRNA	YKR068C	YKR068C	.	.	XI:570327-570909	WT	ksp1-KD	OK	150.345	251.41	0.74177	4.26641	5e-05	0.000294606	yes	1.67223	Yes
YMR057C_mRNA	YMR057C	YMR057C	.	.	XIII:388358-388730	WT	ksp1-KD	OK	3.42271	5.71966	0.740791	1.54894	0.01235	0.035704	yes	1.67109	Yes
YDR223W_mRNA	YDR223W	YDR223W	.	.	IV:912098-913502	WT	ksp1-KD	OK	14.0515	23.4801	0.74071	3.46496	5e-05	0.000294606	yes	1.671	Yes
YHR180W_mRNA	YHR180W	YHR180W	.	.	VIII:465177-465669	WT	ksp1-KD	OK	36.0507	60.2045	0.739845	3.16819	5e-05	0.000294606	yes	1.67	Yes
YDR034W-B_mRNA	YDR034W-B	YDR034W-B	.	.	IV:521313-521469	WT	ksp1-KD	OK	63.6026	106.08	0.737993	5.03259	0.0036	0.0127154	yes	1.66785	Yes
YOL047C_mRNA	YOL047C	YOL047C	.	.	XV:241613-242747	WT	ksp1-KD	OK	4.66731	7.78258	0.737658	2.49554	5e-05	0.000294606	yes	1.66747	Yes
YBR184W_mRNA	YBR184W	YBR184W	.	.	II:597362-598934	WT	ksp1-KD	OK	3.4587	5.76008	0.735858	2.76723	0.0001	0.000557854	yes	1.66539	Yes
YMR059W_mRNA	YMR059W	YMR059W	.	.	XIII:391098-391485	WT	ksp1-KD	OK	59.7941	99.5219	0.735011	3.48905	5e-05	0.000294606	yes	1.66441	Yes
YER103W_mRNA	YER103W	YER103W	.	.	V:364588-366517	WT	ksp1-KD	OK	38.4338	63.9655	0.734919	4.06834	5e-05	0.000294606	yes	1.6643	Yes
YDR203W_mRNA	YDR203W	YDR203W	.	.	IV:856897-857999	WT	ksp1-KD	OK	118.908	197.735	0.733719	2.77514	0.0116	0.033852	yes	1.66292	Yes
YLL018C_mRNA	YLL018C	YLL018C	.	.	XII:109901-111575	WT	ksp1-KD	OK	213.762	355.41	0.733476	2.54714	5e-05	0.000294606	yes	1.66264	Yes
YCL004W_mRNA	YCL004W	YCL004W	.	.	III:109104-110670	WT	ksp1-KD	OK	9.10317	15.1293	0.732906	4.52669	5e-05	0.000294606	yes	1.66198	Yes
YHR209W_mRNA	YHR209W	YHR209W	.	.	VIII:519436-520312	WT	ksp1-KD	OK	85.6812	142.264	0.731525	4.43922	5e-05	0.000294606	yes	1.66039	Yes
YER106W_mRNA	YER106W	YER106W	.	.	V:372325-373234	WT	ksp1-KD	OK	1.56145	2.58914	0.729582	1.80342	0.0114	0.0333732	yes	1.65816	Yes
YDR374W-A_mRNA	YDR374W-A	YDR374W-A	.	.	IV:1224756-1225026	WT	ksp1-KD	OK	121.89	202.109	0.729549	3.62638	5e-05	0.000294606	yes	1.65812	Yes
YMR101C_mRNA	YMR101C	YMR101C	.	.	XIII:468444-469476	WT	ksp1-KD	OK	1.63769	2.71546	0.729538	1.66068	0.00575	0.0188924	yes	1.65811	Yes
YMR019W_mRNA	YMR019W	YMR019W	.	.	XIII:312155-315005	WT	ksp1-KD	OK	17.2868	28.6631	0.729523	4.76399	5e-05	0.000294606	yes	1.65809	Yes
YDL104C_mRNA	YDL104C	YDL104C	.	.	IV:273652-274876	WT	ksp1-KD	OK	24.4862	40.5908	0.729182	3.40787	5e-05	0.000294606	yes	1.6577	Yes
YCR053W_mRNA	YCR053W	YCR053W	.	.	III:216696-218241	WT	ksp1-KD	OK	286.891	475.33	0.728427	2.50766	5e-05	0.000294606	yes	1.65683	Yes
YDR312W_mRNA	YDR312W	YDR312W	.	.	IV:1087580-1088942	WT	ksp1-KD	OK	27.2287	45.1017	0.728055	6.1714	5e-05	0.000294606	yes	1.6564	Yes
YGR105W_mRNA	YGR105W	YGR105W	.	.	VII:698598-698832	WT	ksp1-KD	OK	169.765	281.163	0.727869	3.43056	5e-05	0.000294606	yes	1.65619	Yes
YKR091W_mRNA	YKR091W	YKR091W	.	.	XI:611524-612265	WT	ksp1-KD	OK	21.2353	35.1679	0.727796	7.79998	5e-05	0.000294606	yes	1.65611	Yes
YPR185W_mRNA	YPR185W	YPR185W	.	.	XVI:907217-909434	WT	ksp1-KD	OK	19.3703	32.0687	0.727318	3.67407	5e-05	0.000294606	yes	1.65556	Yes
YBR018C_mRNA	YBR018C	YBR018C	.	.	II:274426-275527	WT	ksp1-KD	OK	1.32446	2.19248	0.72716	1.69901	0.0044	0.0151219	yes	1.65538	Yes
YCR083W_mRNA	YCR083W	YCR083W	.	.	III:259577-259961	WT	ksp1-KD	OK	1184.48	1960.38	0.726883	4.6235	5e-05	0.000294606	yes	1.65506	Yes
YPL274W_mRNA	YPL274W	YPL274W	.	.	XVI:22937-24701	WT	ksp1-KD	OK	49.759	82.3404	0.726642	3.21731	5e-05	0.000294606	yes	1.65478	Yes
YHR214W_mRNA	YHR214W	YHR214W	.	.	VIII:541650-542262	WT	ksp1-KD	OK	0.874463	1.44588	0.725481	1.53095	0.0094	0.0282174	yes	1.65345	Yes
YOR065W_mRNA	YOR065W	YOR065W	.	.	XV:447438-448368	WT	ksp1-KD	OK	356.992	589.93	0.724652	2.94126	5e-05	0.000294606	yes	1.6525	Yes
YMR063W_mRNA	YMR063W	YMR063W	.	.	XIII:397076-397796	WT	ksp1-KD	OK	22.4765	37.1328	0.724278	3.57741	5e-05	0.000294606	yes	1.65207	Yes
YIL079C_mRNA	YIL079C	YIL079C	.	.	IX:210922-212005	WT	ksp1-KD	OK	46.2231	76.3548	0.724105	3.36112	5e-05	0.000294606	yes	1.65188	Yes
YKL217W_mRNA	YKL217W	YKL217W	.	.	XI:22233-24084	WT	ksp1-KD	OK	9.0862	15.0071	0.723892	2.97937	5e-05	0.000294606	yes	1.65163	Yes
YGL219C_mRNA	YGL219C	YGL219C	.	.	VII:82877-84300	WT	ksp1-KD	OK	41.18	68.0099	0.723801	2.82051	5e-05	0.000294606	yes	1.65153	Yes
YCR001W_mRNA	YCR001W	YCR001W	.	.	III:115684-115999	WT	ksp1-KD	OK	36.7236	60.6383	0.723521	2.3464	0.0001	0.000557854	yes	1.65121	Yes
YDR123C_mRNA	YDR123C	YDR123C	.	.	IV:698553-699468	WT	ksp1-KD	OK	20.8663	34.4032	0.721369	3.37379	5e-05	0.000294606	yes	1.64875	Yes
YJL024C_mRNA	YJL024C	YJL024C	.	.	X:395930-396592	WT	ksp1-KD	OK	67.8763	111.888	0.72107	4.13894	5e-05	0.000294606	yes	1.6484	Yes
YEL005C_mRNA	YEL005C	YEL005C	.	.	V:145906-146755	WT	ksp1-KD	OK	30.7031	50.6081	0.720986	3.8001	5e-05	0.000294606	yes	1.64831	Yes
YER044C-A_mRNA	YER044C-A	YER044C-A	.	.	V:238459-239774	WT	ksp1-KD	OK	2.37674	3.91416	0.719718	2.12122	0.0004	0.00194581	yes	1.64686	Yes
YER139C_mRNA	YER139C	YER139C	.	.	V:450562-451243	WT	ksp1-KD	OK	50.652	83.3865	0.719194	3.62477	5e-05	0.000294606	yes	1.64626	Yes
YMR287C_mRNA	YMR287C	YMR287C	.	.	XIII:842435-845345	WT	ksp1-KD	OK	9.08321	14.937	0.717614	3.52892	5e-05	0.000294606	yes	1.64446	Yes
YGR230W_mRNA	YGR230W	YGR230W	.	.	VII:951893-952307	WT	ksp1-KD	OK	66.2903	108.951	0.716812	3.65333	5e-05	0.000294606	yes	1.64355	Yes
YBR185C_mRNA	YBR185C	YBR185C	.	.	II:599122-599959	WT	ksp1-KD	OK	18.185	29.8602	0.715477	2.99766	5e-05	0.000294606	yes	1.64203	Yes
YIL009C-A_mRNA	YIL009C-A	YIL009C-A	.	.	IX:335665-336212	WT	ksp1-KD	OK	54.2418	89.0402	0.715051	3.47603	5e-05	0.000294606	yes	1.64154	Yes
YBL033C_mRNA	YBL033C	YBL033C	.	.	II:158655-159693	WT	ksp1-KD	OK	300.446	491.981	0.711495	3.45056	5e-05	0.000294606	yes	1.6375	Yes
YLL035W_mRNA	YLL035W	YLL035W	.	.	XII:68579-70478	WT	ksp1-KD	OK	13.9582	22.8438	0.710697	3.31983	5e-05	0.000294606	yes	1.63659	Yes
YJR062C_mRNA	YJR062C	YJR062C	.	.	X:553475-554849	WT	ksp1-KD	OK	35.4308	57.9763	0.710459	3.66619	5e-05	0.000294606	yes	1.63632	Yes
YBL043W_mRNA	YBL043W	YBL043W	.	.	II:136687-137461	WT	ksp1-KD	OK	53.242	87.0474	0.709236	4.91332	5e-05	0.000294606	yes	1.63494	Yes
YBL049W_mRNA	YBL049W	YBL049W	.	.	II:126827-127244	WT	ksp1-KD	OK	669.785	1094.61	0.708644	2.89841	5e-05	0.000294606	yes	1.63427	Yes
YMR158W_mRNA	YMR158W	YMR158W	.	.	XIII:572247-572715	WT	ksp1-KD	OK	69.1827	112.939	0.707062	4.05607	5e-05	0.000294606	yes	1.63248	Yes
YIL093C_mRNA	YIL093C	YIL093C	.	.	IX:187989-188784	WT	ksp1-KD	OK	34.2198	55.8596	0.706974	3.64026	5e-05	0.000294606	yes	1.63238	Yes
YMR245W_mRNA	YMR245W	YMR245W	.	.	XIII:758516-759183	WT	ksp1-KD	OK	17.0649	27.848	0.706546	2.6581	5e-05	0.000294606	yes	1.63189	Yes
YOR196C_mRNA	YOR196C	YOR196C	.	.	XV:715592-716837	WT	ksp1-KD	OK	112.307	183.144	0.705536	4.16654	5e-05	0.000294606	yes	1.63075	Yes
YNL035C_mRNA	YNL035C	YNL035C	.	.	XIV:568521-569691	WT	ksp1-KD	OK	23.8624	38.9078	0.705321	4.52584	5e-05	0.000294606	yes	1.63051	Yes
YCR106W_mRNA	YCR106W	YCR106W	.	.	III:310957-313456	WT	ksp1-KD	OK	7.30893	11.9157	0.705134	3.49187	5e-05	0.000294606	yes	1.6303	Yes
YNL259C_mRNA	YNL259C	YNL259C	.	.	XIV:157643-157865	WT	ksp1-KD	OK	343.811	559.984	0.703768	3.94674	5e-05	0.000294606	yes	1.62875	Yes
YJL130C_mRNA	YJL130C	YJL130C	.	.	X:165722-172367	WT	ksp1-KD	OK	66.7054	108.63	0.703549	2.36789	0.0002	0.00103818	yes	1.62851	Yes
YGR194C_mRNA	YGR194C	YGR194C	.	.	VII:886072-887875	WT	ksp1-KD	OK	19.3565	31.5054	0.702781	3.3209	5e-05	0.000294606	yes	1.62764	Yes
YNL160W_mRNA	YNL160W	YNL160W	.	.	XIV:336544-337609	WT	ksp1-KD	OK	436.412	709.504	0.701121	2.67519	0.00015	0.000804996	yes	1.62577	Yes
YKR071C_mRNA	YKR071C	YKR071C	.	.	XI:574933-575980	WT	ksp1-KD	OK	160.213	260.411	0.700804	3.08803	5e-05	0.000294606	yes	1.62541	Yes
YGR017W_mRNA	YGR017W	YGR017W	.	.	VII:523786-524694	WT	ksp1-KD	OK	125.153	203.423	0.700792	2.99619	5e-05	0.000294606	yes	1.6254	Yes
YGL218W_mRNA	YGL218W	YGL218W	.	.	VII:82877-84300	WT	ksp1-KD	OK	82.8623	134.55	0.699355	1.74811	0.0027	0.00994181	yes	1.62378	Yes
YJL131C_mRNA	YJL131C	YJL131C	.	.	X:164277-165348	WT	ksp1-KD	OK	45.9535	74.3559	0.694272	4.82633	5e-05	0.000294606	yes	1.61807	Yes
YJR156C_mRNA	YJR156C	YJR156C	.	.	X:728573-729596	WT	ksp1-KD	OK	4.40943	7.13366	0.694052	2.09043	0.00065	0.00297909	yes	1.61782	Yes
YER186C_mRNA	YER186C	YER186C	.	.	V:561704-562625	WT	ksp1-KD	OK	73.6053	119.066	0.693883	4.12404	5e-05	0.000294606	yes	1.61763	Yes
YBL019W_mRNA	YBL019W	YBL019W	.	.	II:184352-185915	WT	ksp1-KD	OK	16.8457	27.2323	0.692942	4.03534	5e-05	0.000294606	yes	1.61658	Yes
YMR300C_mRNA	YMR300C	YMR300C	.	.	XIII:865558-867091	WT	ksp1-KD	OK	87.3377	141.162	0.692677	2.82385	5e-05	0.000294606	yes	1.61628	Yes
YNL119W_mRNA	YNL119W	YNL119W	.	.	XIV:401032-402521	WT	ksp1-KD	OK	57.6638	93.1422	0.69177	3.69303	5e-05	0.000294606	yes	1.61526	Yes
YOL083W_mRNA	YOL083W	YOL083W	.	.	XV:165713-166952	WT	ksp1-KD	OK	39.0432	63.052	0.69147	3.35061	5e-05	0.000294606	yes	1.61493	Yes
YMR191W_mRNA	YMR191W	YMR191W	.	.	XIII:645655-646777	WT	ksp1-KD	OK	127.675	206.105	0.6909	2.90161	5e-05	0.000294606	yes	1.61429	Yes
YGL128C_mRNA	YGL128C	YGL128C	.	.	VII:269292-270144	WT	ksp1-KD	OK	30.9323	49.931	0.690819	3.25142	5e-05	0.000294606	yes	1.6142	Yes
YDL180W_mRNA	YDL180W	YDL180W	.	.	IV:135895-137539	WT	ksp1-KD	OK	31.1436	50.2569	0.690387	3.38838	5e-05	0.000294606	yes	1.61372	Yes
YMR105C_mRNA	YMR105C	YMR105C	.	.	XIII:475896-477606	WT	ksp1-KD	OK	45.4582	73.3378	0.690016	3.03715	5e-05	0.000294606	yes	1.6133	Yes
YBR194W_mRNA	YBR194W	YBR194W	.	.	II:610037-610409	WT	ksp1-KD	OK	59.8135	96.472	0.689639	2.3931	5e-05	0.000294606	yes	1.61288	Yes
YJR074W_mRNA	YJR074W	YJR074W	.	.	X:573094-573751	WT	ksp1-KD	OK	85.9617	138.615	0.689316	3.32251	5e-05	0.000294606	yes	1.61252	Yes
YMR009W_mRNA	YMR009W	YMR009W	.	.	XIII:284101-284641	WT	ksp1-KD	OK	670.785	1080.73	0.688078	3.2521	5e-05	0.000294606	yes	1.61114	Yes
YKR062W_mRNA	YKR062W	YKR062W	.	.	XI:559665-560652	WT	ksp1-KD	OK	62.889	101.306	0.687847	4.83794	5e-05	0.000294606	yes	1.61088	Yes
YDR253C_mRNA	YDR253C	YDR253C	.	.	IV:963989-964565	WT	ksp1-KD	OK	123.668	198.905	0.685614	3.68925	5e-05	0.000294606	yes	1.60839	Yes
YOL155C_mRNA	YOL155C	YOL155C	.	.	XV:28702-31606	WT	ksp1-KD	OK	470.844	757.289	0.685595	3.54719	0.00025	0.00126538	yes	1.60837	Yes
YKL222C_mRNA	YKL222C	YKL222C	.	.	XI:3502-5620	WT	ksp1-KD	OK	17.8135	28.65	0.685562	3.25356	5e-05	0.000294606	yes	1.60833	Yes
YBL071W-A_mRNA	YBL071W-A	YBL071W-A	.	.	II:89977-90531	WT	ksp1-KD	OK	264.047	424.597	0.685301	2.33775	0.0003	0.00149174	yes	1.60804	Yes
YOR328W_mRNA	YOR328W	YOR328W	.	.	XV:931802-936497	WT	ksp1-KD	OK	8.68017	13.9552	0.685005	3.32436	5e-05	0.000294606	yes	1.60771	Yes
YGR215W_mRNA	YGR215W	YGR215W	.	.	VII:922174-922507	WT	ksp1-KD	OK	165.518	265.997	0.684422	3.71996	5e-05	0.000294606	yes	1.60706	Yes
YBR188C_mRNA	YBR188C	YBR188C	.	.	II:603684-604107	WT	ksp1-KD	OK	67.6475	108.712	0.684401	3.1231	5e-05	0.000294606	yes	1.60703	Yes
YOR245C_mRNA	YOR245C	YOR245C	.	.	XV:794075-795332	WT	ksp1-KD	OK	41.3435	66.4315	0.684208	4.75685	5e-05	0.000294606	yes	1.60682	Yes
YKR099W_mRNA	YKR099W	YKR099W	.	.	XI:635850-638286	WT	ksp1-KD	OK	39.6739	63.7339	0.683873	3.06793	5e-05	0.000294606	yes	1.60645	Yes
YPR098C_mRNA	YPR098C	YPR098C	.	.	XVI:728946-729528	WT	ksp1-KD	OK	162.529	261.033	0.683541	3.36055	5e-05	0.000294606	yes	1.60608	Yes
YOL020W_mRNA	YOL020W	YOL020W	.	.	XV:286171-287950	WT	ksp1-KD	OK	6.20181	9.95599	0.682875	2.6359	5e-05	0.000294606	yes	1.60534	Yes
YIL024C_mRNA	YIL024C	YIL024C	.	.	IX:308601-309171	WT	ksp1-KD	OK	65.5508	104.928	0.678708	3.38071	5e-05	0.000294606	yes	1.60071	Yes
YLR173W_mRNA	YLR173W	YLR173W	.	.	XII:502420-504247	WT	ksp1-KD	OK	30.279	48.4672	0.678692	3.96088	5e-05	0.000294606	yes	1.60069	Yes
YGR292W_mRNA	YGR292W	YGR292W	.	.	VII:1076598-1078353	WT	ksp1-KD	OK	1.09922	1.75798	0.677438	1.68343	0.0047	0.0159589	yes	1.5993	Yes
snR51_snoRNA	snR51	snR51	.	.	XVI:718699-718806	WT	ksp1-KD	OK	331.696	529.975	0.676064	1.53249	0.0111	0.032642	yes	1.59777	Yes
YDL087C_mRNA	YDL087C	YDL087C	.	.	IV:300213-300999	WT	ksp1-KD	OK	16.88	26.97	0.676037	2.74038	5e-05	0.000294606	yes	1.59774	Yes
YGL162W_mRNA	YGL162W	YGL162W	.	.	VII:198137-199037	WT	ksp1-KD	OK	9.24941	14.7694	0.675179	6.05888	5e-05	0.000294606	yes	1.59679	Yes
YEL029C_mRNA	YEL029C	YEL029C	.	.	V:96857-97796	WT	ksp1-KD	OK	110.397	176.114	0.673808	3.27687	5e-05	0.000294606	yes	1.59528	Yes
YNR034W_mRNA	YNR034W	YNR034W	.	.	XIV:690320-691286	WT	ksp1-KD	OK	37.2723	59.4531	0.673646	3.32278	5e-05	0.000294606	yes	1.5951	Yes
YGL220W_mRNA	YGL220W	YGL220W	.	.	VII:82373-82736	WT	ksp1-KD	OK	194.704	310.313	0.672441	3.35483	5e-05	0.000294606	yes	1.59377	Yes
YOR193W_mRNA	YOR193W	YOR193W	.	.	XV:710445-711576	WT	ksp1-KD	OK	31.8217	50.7009	0.671999	3.29779	5e-05	0.000294606	yes	1.59328	Yes
YNL032W_mRNA	YNL032W	YNL032W	.	.	XIV:574505-575351	WT	ksp1-KD	OK	114.838	182.876	0.671259	4.15463	5e-05	0.000294606	yes	1.59246	Yes
YMR052W_mRNA	YMR052W	YMR052W	.	.	XIII:379585-382898	WT	ksp1-KD	OK	30.7299	48.9353	0.67123	1.73605	0.0045	0.0153843	yes	1.59243	Yes
YHR199C_mRNA	YHR199C	YHR199C	.	.	VIII:497489-498422	WT	ksp1-KD	OK	113.437	180.61	0.670985	3.42256	5e-05	0.000294606	yes	1.59216	Yes
YMR321C_mRNA	YMR321C	YMR321C	.	.	XIII:917578-917896	WT	ksp1-KD	OK	8.8655	14.1145	0.670908	1.66179	0.0072	0.0228816	yes	1.59207	Yes
YDL118W_mRNA	YDL118W	YDL118W	.	.	IV:246688-247682	WT	ksp1-KD	OK	16.2176	25.8051	0.670096	1.44591	0.0125	0.0360735	yes	1.59118	Yes
YOL165C_mRNA	YOL165C	YOL165C	.	.	XV:1646-2078	WT	ksp1-KD	OK	6.8208	10.8518	0.669924	1.89598	0.0094	0.0282174	yes	1.59099	Yes
YHR016C_mRNA	YHR016C	YHR016C	.	.	VIII:136880-138455	WT	ksp1-KD	OK	32.8207	52.0785	0.666082	3.21451	5e-05	0.000294606	yes	1.58676	Yes
YDR329C_mRNA	YDR329C	YDR329C	.	.	IV:1126269-1127595	WT	ksp1-KD	OK	56.3077	89.2859	0.665101	3.06206	5e-05	0.000294606	yes	1.58568	Yes
YIL066C_mRNA	YIL066C	YIL066C	.	.	IX:238098-240708	WT	ksp1-KD	OK	14.178	22.4736	0.664583	3.32259	5e-05	0.000294606	yes	1.58511	Yes
YMR137C_mRNA	YMR137C	YMR137C	.	.	XIII:542977-544963	WT	ksp1-KD	OK	15.9947	25.3461	0.664166	3.52978	5e-05	0.000294606	yes	1.58465	Yes
YDR214W_mRNA	YDR214W	YDR214W	.	.	IV:892874-893927	WT	ksp1-KD	OK	97.9829	155.224	0.663746	3.67282	5e-05	0.000294606	yes	1.58419	Yes
YOR378W_mRNA	YOR378W	YOR378W	.	.	XV:1049510-1051064	WT	ksp1-KD	OK	7.65449	12.1232	0.663397	2.91958	5e-05	0.000294606	yes	1.58381	Yes
YNL229C_mRNA	YNL229C	YNL229C	.	.	XIV:219136-220201	WT	ksp1-KD	OK	104.649	165.693	0.662951	3.11316	5e-05	0.000294606	yes	1.58332	Yes
YCL001W-A_mRNA	YCL001W-A	YCL001W-A	.	.	III:113079-113541	WT	ksp1-KD	OK	14.1617	22.4179	0.662655	2.34955	0.00065	0.00297909	yes	1.58299	Yes
YHL009C_mRNA	YHL009C	YHL009C	.	.	VIII:84067-85060	WT	ksp1-KD	OK	25.1671	39.8235	0.662083	2.92262	5e-05	0.000294606	yes	1.58237	Yes
YCR007C_mRNA	YCR007C	YCR007C	.	.	III:126010-126730	WT	ksp1-KD	OK	70.3794	111.336	0.6617	3.73958	5e-05	0.000294606	yes	1.58195	Yes
YGL215W_mRNA	YGL215W	YGL215W	.	.	VII:87980-89339	WT	ksp1-KD	OK	152.086	240.573	0.661585	3.22637	5e-05	0.000294606	yes	1.58182	Yes
YLR361C-A_mRNA	YLR361C-A	YLR361C-A	.	.	XII:849382-849679	WT	ksp1-KD	OK	551.385	871.898	0.6611	4.70684	5e-05	0.000294606	yes	1.58129	Yes
YGL114W_mRNA	YGL114W	YGL114W	.	.	VII:293459-295637	WT	ksp1-KD	OK	51.8435	81.9356	0.660327	2.8105	5e-05	0.000294606	yes	1.58044	Yes
YPL205C_mRNA	YPL205C	YPL205C	.	.	XVI:163921-164266	WT	ksp1-KD	OK	4.71663	7.45356	0.660174	1.95107	0.0064	0.0207243	yes	1.58027	Yes
YER084W_mRNA	YER084W	YER084W	.	.	V:327064-327451	WT	ksp1-KD	OK	4.09223	6.4651	0.659783	10.649	0.00355	0.012573	yes	1.57984	Yes
YAL044C_mRNA	YAL044C	YAL044C	.	.	I:57949-58462	WT	ksp1-KD	OK	504.991	797.335	0.658928	2.88397	5e-05	0.000294606	yes	1.57891	Yes
YHR195W_mRNA	YHR195W	YHR195W	.	.	VIII:490746-491712	WT	ksp1-KD	OK	96.8039	152.761	0.658144	3.4837	5e-05	0.000294606	yes	1.57805	Yes
YNL331C_mRNA	YNL331C	YNL331C	.	.	XIV:16117-17248	WT	ksp1-KD	OK	31.1234	49.0835	0.657239	3.2666	5e-05	0.000294606	yes	1.57706	Yes
YPR010C-A_mRNA	YPR010C-A	YPR010C-A	.	.	XVI:582372-582734	WT	ksp1-KD	OK	2313.39	3647.33	0.656829	3.44878	5e-05	0.000294606	yes	1.57661	Yes
YGR149W_mRNA	YGR149W	YGR149W	.	.	VII:789030-790329	WT	ksp1-KD	OK	40.3337	63.59	0.656815	3.5116	5e-05	0.000294606	yes	1.5766	Yes
YIL161W_mRNA	YIL161W	YIL161W	.	.	IX:39432-40140	WT	ksp1-KD	OK	85.4707	134.694	0.656181	3.59807	5e-05	0.000294606	yes	1.57591	Yes
YER101C_mRNA	YER101C	YER101C	.	.	V:360501-361794	WT	ksp1-KD	OK	30.7434	48.4379	0.655857	3.20584	5e-05	0.000294606	yes	1.57555	Yes
YLR201C_mRNA	YLR201C	YLR201C	.	.	XII:549510-550636	WT	ksp1-KD	OK	56.0458	88.2952	0.65573	4.63118	5e-05	0.000294606	yes	1.57541	Yes
YJL003W_mRNA	YJL003W	YJL003W	.	.	X:432643-433000	WT	ksp1-KD	OK	62.4914	98.3998	0.654998	2.99331	5e-05	0.000294606	yes	1.57461	Yes
YBR012C_mRNA	YBR012C	YBR012C	.	.	II:259146-259566	WT	ksp1-KD	OK	101.895	160.382	0.654437	3.11181	5e-05	0.000294606	yes	1.574	Yes
YDL090C_mRNA	YDL090C	YDL090C	.	.	IV:295033-296329	WT	ksp1-KD	OK	27.5954	43.4297	0.654252	3.98385	5e-05	0.000294606	yes	1.5738	Yes
YML043C_mRNA	YML043C	YML043C	.	.	XIII:190243-191767	WT	ksp1-KD	OK	21.607	33.9651	0.652558	3.43435	5e-05	0.000294606	yes	1.57195	Yes
YDR077W_mRNA	YDR077W	YDR077W	.	.	IV:600792-601809	WT	ksp1-KD	OK	2413.29	3789.45	0.650986	4.2933	0.00075	0.00336852	yes	1.57024	Yes
YHR214W-A_mRNA	YHR214W-A	YHR214W-A	.	.	VIII:543007-543493	WT	ksp1-KD	OK	2.14514	3.36714	0.650449	4.20487	0.0139	0.0394826	yes	1.56966	Yes
YEL052W_mRNA	YEL052W	YEL052W	.	.	V:56570-58100	WT	ksp1-KD	OK	33.8616	53.1246	0.649731	3.29719	5e-05	0.000294606	yes	1.56888	Yes
YKL110C_mRNA	YKL110C	YKL110C	.	.	XI:228938-229880	WT	ksp1-KD	OK	53.002	83.148	0.649635	3.11614	5e-05	0.000294606	yes	1.56877	Yes
YOR011W_mRNA	YOR011W	YOR011W	.	.	XV:349678-353863	WT	ksp1-KD	OK	5.04254	7.90999	0.649525	2.94814	5e-05	0.000294606	yes	1.56865	Yes
YLR294C_mRNA	YLR294C	YLR294C	.	.	XII:721700-722373	WT	ksp1-KD	OK	402.732	631.135	0.64813	1.87999	0.00175	0.00690543	yes	1.56714	Yes
YNR066C_mRNA	YNR066C	YNR066C	.	.	XIV:753724-755035	WT	ksp1-KD	OK	7.93982	12.4418	0.648015	2.40913	5e-05	0.000294606	yes	1.56701	Yes
YOL159C-A_mRNA	YOL159C-A	YOL159C-A	.	.	XV:15232-15505	WT	ksp1-KD	OK	52.7697	82.6856	0.647926	2.47391	0.00285	0.0104116	yes	1.56691	Yes
YPR064W_mRNA	YPR064W	YPR064W	.	.	XVI:678950-679370	WT	ksp1-KD	OK	10.369	16.2426	0.647499	2.44112	0.0006	0.0027833	yes	1.56645	Yes
YJR078W_mRNA	YJR078W	YJR078W	.	.	X:578859-581616	WT	ksp1-KD	OK	31.8319	49.821	0.646281	1.68046	0.01665	0.0457928	yes	1.56513	Yes
YLL059C_mRNA	YLL059C	YLL059C	.	.	XII:22473-22980	WT	ksp1-KD	OK	3.13253	4.90226	0.646121	1.66171	0.00835	0.0257066	yes	1.56495	Yes
YDR059C_mRNA	YDR059C	YDR059C	.	.	IV:569233-569770	WT	ksp1-KD	OK	381.569	596.976	0.645729	2.8079	5e-05	0.000294606	yes	1.56453	Yes
YLR109W_mRNA	YLR109W	YLR109W	.	.	XII:368780-369311	WT	ksp1-KD	OK	1427.94	2233.39	0.645301	2.65951	0.0006	0.0027833	yes	1.56407	Yes
YDL068W_mRNA	YDL068W	YDL068W	.	.	IV:333120-333829	WT	ksp1-KD	OK	28.3559	44.3281	0.644574	1.87375	0.003	0.010874	yes	1.56328	Yes
YDR511W_mRNA	YDR511W	YDR511W	.	.	IV:1470016-1470418	WT	ksp1-KD	OK	47.7648	74.5948	0.643127	3.5996	5e-05	0.000294606	yes	1.56171	Yes
YLR318W_mRNA	YLR318W	YLR318W	.	.	XII:766541-769196	WT	ksp1-KD	OK	6.28243	9.80681	0.642461	3.40308	5e-05	0.000294606	yes	1.56099	Yes
YDR079W_mRNA	YDR079W	YDR079W	.	.	IV:603063-603399	WT	ksp1-KD	OK	175.605	274.059	0.642151	3.09528	5e-05	0.000294606	yes	1.56065	Yes
YHR037W_mRNA	YHR037W	YHR037W	.	.	VIII:181976-183704	WT	ksp1-KD	OK	243.678	380.221	0.641864	2.52197	0.00015	0.000804996	yes	1.56034	Yes
YLL039C_mRNA	YLL039C	YLL039C	.	.	XII:64061-65207	WT	ksp1-KD	OK	1177.46	1836.41	0.641214	1.96403	0.001	0.00430113	yes	1.55964	Yes
YAL048C_mRNA	YAL048C	YAL048C	.	.	I:52800-54913	WT	ksp1-KD	OK	19.46	30.3425	0.640829	3.30473	5e-05	0.000294606	yes	1.55922	Yes
YOL077W-A_mRNA	YOL077W-A	YOL077W-A	.	.	XV:185437-185644	WT	ksp1-KD	OK	315.998	492.344	0.639752	2.90877	5e-05	0.000294606	yes	1.55806	Yes
YER127W_mRNA	YER127W	YER127W	.	.	V:414480-415554	WT	ksp1-KD	OK	51.0196	79.4651	0.639268	3.05	5e-05	0.000294606	yes	1.55754	Yes
YGR280C_mRNA	YGR280C	YGR280C	.	.	VII:1050909-1051725	WT	ksp1-KD	OK	202.756	315.758	0.639075	4.67676	5e-05	0.000294606	yes	1.55733	Yes
YIR014W_mRNA	YIR014W	YIR014W	.	.	IX:381085-381814	WT	ksp1-KD	OK	14.6669	22.841	0.639066	2.20457	0.0002	0.00103818	yes	1.55732	Yes
YCR020C_mRNA	YCR020C	YCR020C	.	.	III:154011-154659	WT	ksp1-KD	OK	60.8478	94.6602	0.637552	2.93503	5e-05	0.000294606	yes	1.55569	Yes
YBR230W-A_mRNA	YBR230W-A	YBR230W-A	.	.	II:680361-680562	WT	ksp1-KD	OK	573.678	891.621	0.63619	3.15338	0.0002	0.00103818	yes	1.55422	Yes
YBL001C_mRNA	YBL001C	YBL001C	.	.	II:237152-237467	WT	ksp1-KD	OK	1801.09	2796.85	0.634927	4.75105	5e-05	0.000294606	yes	1.55286	Yes
YMR066W_mRNA	YMR066W	YMR066W	.	.	XIII:401540-404237	WT	ksp1-KD	OK	12.1445	18.8471	0.634044	3.00464	5e-05	0.000294606	yes	1.55191	Yes
YGR052W_mRNA	YGR052W	YGR052W	.	.	VII:593595-594705	WT	ksp1-KD	OK	34.1537	52.9448	0.632445	3.14416	5e-05	0.000294606	yes	1.55019	Yes
YOL164W-A_mRNA	YOL164W-A	YOL164W-A	.	.	XV:4129-4312	WT	ksp1-KD	OK	77.6811	120.409	0.632305	2.88559	0.00325	0.0116373	yes	1.55004	Yes
YLR191W_mRNA	YLR191W	YLR191W	.	.	XII:537271-538432	WT	ksp1-KD	OK	34.3241	53.1753	0.631534	3.02983	5e-05	0.000294606	yes	1.54921	Yes
YFL018C_mRNA	YFL018C	YFL018C	.	.	VI:101627-103127	WT	ksp1-KD	OK	261.038	404.328	0.631266	2.38528	0.00015	0.000804996	yes	1.54892	Yes
YDR179C_mRNA	YDR179C	YDR179C	.	.	IV:818707-819196	WT	ksp1-KD	OK	203.874	315.706	0.630903	4.0476	5e-05	0.000294606	yes	1.54853	Yes
YLR288C_mRNA	YLR288C	YLR288C	.	.	XII:713479-714904	WT	ksp1-KD	OK	15.4364	23.9031	0.630861	3.3734	5e-05	0.000294606	yes	1.54849	Yes
YKL061W_mRNA	YKL061W	YKL061W	.	.	XI:325770-326112	WT	ksp1-KD	OK	247.14	382.241	0.629151	5.55007	5e-05	0.000294606	yes	1.54665	Yes
YLL062C_mRNA	YLL062C	YLL062C	.	.	XII:16638-17613	WT	ksp1-KD	OK	45.9893	71.0478	0.627493	3.13521	5e-05	0.000294606	yes	1.54488	Yes
YNL194C_mRNA	YNL194C	YNL194C	.	.	XIV:272709-273615	WT	ksp1-KD	OK	6.57284	10.1448	0.62615	3.66602	0.0005	0.00238233	yes	1.54344	Yes
YDR126W_mRNA	YDR126W	YDR126W	.	.	IV:703233-704244	WT	ksp1-KD	OK	22.831	35.2073	0.624882	2.93005	5e-05	0.000294606	yes	1.54208	Yes
YLR093C_mRNA	YLR093C	YLR093C	.	.	XII:326512-327415	WT	ksp1-KD	OK	211.034	325.409	0.624779	2.79582	5e-05	0.000294606	yes	1.54197	Yes
YPL027W_mRNA	YPL027W	YPL027W	.	.	XVI:499664-500402	WT	ksp1-KD	OK	2.98753	4.60502	0.624253	1.57357	0.01485	0.0416531	yes	1.54141	Yes
YKR078W_mRNA	YKR078W	YKR078W	.	.	XI:584951-586709	WT	ksp1-KD	OK	21.7246	33.4418	0.622322	3.2	5e-05	0.000294606	yes	1.53935	Yes
YKL114C_mRNA	YKL114C	YKL114C	.	.	XI:223351-224455	WT	ksp1-KD	OK	112.335	172.862	0.62181	3.89994	5e-05	0.000294606	yes	1.5388	Yes
YDR259C_mRNA	YDR259C	YDR259C	.	.	IV:974630-975782	WT	ksp1-KD	OK	26.18	40.28	0.621602	3.11702	5e-05	0.000294606	yes	1.53858	Yes
YLR343W_mRNA	YLR343W	YLR343W	.	.	XII:816093-817761	WT	ksp1-KD	OK	9.18564	14.1314	0.621451	2.5178	5e-05	0.000294606	yes	1.53842	Yes
YML123C_mRNA	YML123C	YML123C	.	.	XIII:24036-25800	WT	ksp1-KD	OK	19.9334	30.6524	0.620814	2.97575	5e-05	0.000294606	yes	1.53774	Yes
YML005W_mRNA	YML005W	YML005W	.	.	XIII:260220-261609	WT	ksp1-KD	OK	40.7485	62.6486	0.620534	3.61037	5e-05	0.000294606	yes	1.53744	Yes
YIL166C_mRNA	YIL166C	YIL166C	.	.	IX:30937-32566	WT	ksp1-KD	OK	8.6315	13.2587	0.619255	2.75548	5e-05	0.000294606	yes	1.53608	Yes
YFL046W_mRNA	YFL046W	YFL046W	.	.	VI:42814-43438	WT	ksp1-KD	OK	88.0963	135.299	0.618995	3.16681	5e-05	0.000294606	yes	1.5358	Yes
YCR023C_mRNA	YCR023C	YCR023C	.	.	III:158537-160373	WT	ksp1-KD	OK	57.3565	88.0786	0.618834	3.19563	5e-05	0.000294606	yes	1.53563	Yes
YDL123W_mRNA	YDL123W	YDL123W	.	.	IV:241417-241840	WT	ksp1-KD	OK	78.0795	119.835	0.618034	3.24973	5e-05	0.000294606	yes	1.53478	Yes
YBR269C_mRNA	YBR269C	YBR269C	.	.	II:742159-742576	WT	ksp1-KD	OK	211.136	323.895	0.617353	3.29021	5e-05	0.000294606	yes	1.53406	Yes
YHR067W_mRNA	YHR067W	YHR067W	.	.	VIII:230969-231812	WT	ksp1-KD	OK	47.9724	73.588	0.617266	2.99368	5e-05	0.000294606	yes	1.53397	Yes
YGL153W_mRNA	YGL153W	YGL153W	.	.	VII:216272-217369	WT	ksp1-KD	OK	19.2821	29.5743	0.617083	1.75922	0.00395	0.0137942	yes	1.53377	Yes
YBR037C_mRNA	YBR037C	YBR037C	.	.	II:310564-311452	WT	ksp1-KD	OK	47.8516	73.3856	0.616932	3.46273	5e-05	0.000294606	yes	1.53361	Yes
YDR531W_mRNA	YDR531W	YDR531W	.	.	IV:1498231-1499335	WT	ksp1-KD	OK	165.838	254.284	0.616672	2.673	5e-05	0.000294606	yes	1.53333	Yes
YDR414C_mRNA	YDR414C	YDR414C	.	.	IV:1295597-1296686	WT	ksp1-KD	OK	23.0998	35.4156	0.616502	3.03772	5e-05	0.000294606	yes	1.53315	Yes
YER074W-A_mRNA	YER074W-A	YER074W-A	.	.	V:307652-308123	WT	ksp1-KD	OK	702.065	1075.28	0.615041	6.6814	5e-05	0.000294606	yes	1.5316	Yes
YML083C_mRNA	YML083C	YML083C	.	.	XIII:99488-101050	WT	ksp1-KD	OK	1.63233	2.49691	0.61321	2.0304	0.0024	0.00903685	yes	1.52966	Yes
YNL245C_mRNA	YNL245C	YNL245C	.	.	XIV:185459-186885	WT	ksp1-KD	OK	150.062	229.242	0.611307	1.67499	0.0167	0.0458527	yes	1.52764	Yes
YGR070W_mRNA	YGR070W	YGR070W	.	.	VII:627805-631273	WT	ksp1-KD	OK	11.3535	17.3347	0.610519	3.04044	5e-05	0.000294606	yes	1.52681	Yes
YLR438W_mRNA	YLR438W	YLR438W	.	.	XII:1012458-1013775	WT	ksp1-KD	OK	7.27179	11.0997	0.610144	3.979	5e-05	0.000294606	yes	1.52641	Yes
YKL209C_mRNA	YKL209C	YKL209C	.	.	XI:42422-46295	WT	ksp1-KD	OK	9.03967	13.7945	0.609751	2.87241	5e-05	0.000294606	yes	1.526	Yes
YHL027W_mRNA	YHL027W	YHL027W	.	.	VIII:51110-52988	WT	ksp1-KD	OK	84.8152	129.329	0.60865	3.92432	5e-05	0.000294606	yes	1.52483	Yes
YER116C_mRNA	YER116C	YER116C	.	.	V:395347-396172	WT	ksp1-KD	OK	55.6269	84.797	0.60823	2.93618	5e-05	0.000294606	yes	1.52439	Yes
YMR114C_mRNA	YMR114C	YMR114C	.	.	XIII:496342-497449	WT	ksp1-KD	OK	34.007	51.8025	0.607191	3.82373	5e-05	0.000294606	yes	1.52329	Yes
YIR033W_mRNA	YIR033W	YIR033W	.	.	IX:416123-419465	WT	ksp1-KD	OK	17.9791	27.3819	0.606906	2.92531	5e-05	0.000294606	yes	1.52299	Yes
YML131W_mRNA	YML131W	YML131W	.	.	XIII:10197-11295	WT	ksp1-KD	OK	94.4773	143.712	0.605144	2.85406	5e-05	0.000294606	yes	1.52113	Yes
YKL161C_mRNA	YKL161C	YKL161C	.	.	XI:149385-150687	WT	ksp1-KD	OK	17.2558	26.2435	0.604876	2.55759	5e-05	0.000294606	yes	1.52085	Yes
YPL098C_mRNA	YPL098C	YPL098C	.	.	XVI:364385-364727	WT	ksp1-KD	OK	136.494	207.417	0.603697	2.8148	5e-05	0.000294606	yes	1.51961	Yes
YNL064C_mRNA	YNL064C	YNL064C	.	.	XIV:505867-507097	WT	ksp1-KD	OK	593.698	902.027	0.603442	2.16015	0.00025	0.00126538	yes	1.51934	Yes
YHR105W_mRNA	YHR105W	YHR105W	.	.	VIII:324765-325410	WT	ksp1-KD	OK	23.3166	35.3747	0.601358	2.20631	0.0002	0.00103818	yes	1.51714	Yes
YBL078C_mRNA	YBL078C	YBL078C	.	.	II:80377-80731	WT	ksp1-KD	OK	1073.67	1627.92	0.60049	6.4822	5e-05	0.000294606	yes	1.51623	Yes
YPL191C_mRNA	YPL191C	YPL191C	.	.	XVI:183596-184679	WT	ksp1-KD	OK	23.8059	36.0852	0.600087	2.58603	0.0001	0.000557854	yes	1.51581	Yes
snR43_snoRNA	snR43	snR43	.	.	III:107503-107712	WT	ksp1-KD	OK	31.2925	47.4232	0.599774	1.47677	0.01535	0.0428705	yes	1.51548	Yes
YNL093W_mRNA	YNL093W	YNL093W	.	.	XIV:449867-450530	WT	ksp1-KD	OK	22.6863	34.378	0.599664	2.10038	0.00025	0.00126538	yes	1.51536	Yes
YJL054W_mRNA	YJL054W	YJL054W	.	.	X:334264-335701	WT	ksp1-KD	OK	60.7961	92.088	0.599035	3.40806	5e-05	0.000294606	yes	1.5147	Yes
YMR148W_mRNA	YMR148W	YMR148W	.	.	XIII:560365-560812	WT	ksp1-KD	OK	59.575	90.2323	0.598937	3.03154	5e-05	0.000294606	yes	1.5146	Yes
YMR035W_mRNA	YMR035W	YMR035W	.	.	XIII:341141-341675	WT	ksp1-KD	OK	21.2397	32.1475	0.597944	2.05607	0.00055	0.00257711	yes	1.51356	Yes
YMR106C_mRNA	YMR106C	YMR106C	.	.	XIII:478300-480190	WT	ksp1-KD	OK	5.9199	8.95667	0.59739	2.82445	5e-05	0.000294606	yes	1.51298	Yes
YGR288W_mRNA	YGR288W	YGR288W	.	.	VII:1070292-1071714	WT	ksp1-KD	OK	24.1716	36.5394	0.596141	2.79993	5e-05	0.000294606	yes	1.51167	Yes
YFL029C_mRNA	YFL029C	YFL029C	.	.	VI:78054-79161	WT	ksp1-KD	OK	41.3827	62.5536	0.596066	3.05155	5e-05	0.000294606	yes	1.51159	Yes
YOR040W_mRNA	YOR040W	YOR040W	.	.	XV:407063-407921	WT	ksp1-KD	OK	66.7424	100.886	0.596051	2.89021	5e-05	0.000294606	yes	1.51157	Yes
YGL158W_mRNA	YGL158W	YGL158W	.	.	VII:207032-208571	WT	ksp1-KD	OK	1.72041	2.59987	0.595683	1.71906	0.00685	0.0219193	yes	1.51119	Yes
YMR073C_mRNA	YMR073C	YMR073C	.	.	XIII:412267-412873	WT	ksp1-KD	OK	54.3147	82.0757	0.595612	2.94235	5e-05	0.000294606	yes	1.51111	Yes
YDL139C_mRNA	YDL139C	YDL139C	.	.	IV:211374-212046	WT	ksp1-KD	OK	42.5524	64.2865	0.595276	2.87738	0.0001	0.000557854	yes	1.51076	Yes
YGR203W_mRNA	YGR203W	YGR203W	.	.	VII:905236-905683	WT	ksp1-KD	OK	137.79	208.143	0.595103	3.61709	5e-05	0.000294606	yes	1.51058	Yes
YNR022C_mRNA	YNR022C	YNR022C	.	.	XIV:669773-670193	WT	ksp1-KD	OK	129.007	194.774	0.594357	3.69146	5e-05	0.000294606	yes	1.5098	Yes
YFR046C_mRNA	YFR046C	YFR046C	.	.	VI:243073-244159	WT	ksp1-KD	OK	50.8912	76.7859	0.593425	3.85084	5e-05	0.000294606	yes	1.50882	Yes
YGL025C_mRNA	YGL025C	YGL025C	.	.	VII:448763-450123	WT	ksp1-KD	OK	26.7473	40.2943	0.59118	7.74785	5e-05	0.000294606	yes	1.50648	Yes
YNL026W_mRNA	YNL026W	YNL026W	.	.	XIV:581919-583374	WT	ksp1-KD	OK	26.4395	39.823	0.590907	3.46603	5e-05	0.000294606	yes	1.50619	Yes
YPL239W_mRNA	YPL239W	YPL239W	.	.	XVI:99483-100086	WT	ksp1-KD	OK	161.589	242.973	0.588466	3.05294	5e-05	0.000294606	yes	1.50365	Yes
YBL093C_mRNA	YBL093C	YBL093C	.	.	II:44255-44918	WT	ksp1-KD	OK	251.586	378.29	0.588444	2.50788	5e-05	0.000294606	yes	1.50362	Yes
YBR240C_mRNA	YBR240C	YBR240C	.	.	II:700489-701842	WT	ksp1-KD	OK	6.79302	10.2096	0.587796	2.47851	0.0001	0.000557854	yes	1.50295	Yes
YOR371C_mRNA	YOR371C	YOR371C	.	.	XV:1031488-1034182	WT	ksp1-KD	OK	14.8826	22.3145	0.584356	2.86403	5e-05	0.000294606	yes	1.49937	No
YJR104C_mRNA	YJR104C	YJR104C	.	.	X:622549-623014	WT	ksp1-KD	OK	2451.42	3674.29	0.583846	1.91392	0.00235	0.00887945	yes	1.49884	No
YKL078W_mRNA	YKL078W	YKL078W	.	.	XI:288844-291052	WT	ksp1-KD	OK	20.2464	30.3439	0.583742	3.16858	5e-05	0.000294606	yes	1.49873	No
YLR251W_mRNA	YLR251W	YLR251W	.	.	XII:641463-642262	WT	ksp1-KD	OK	67.6921	101.433	0.583464	2.32572	0.0002	0.00103818	yes	1.49844	No
YBR026C_mRNA	YBR026C	YBR026C	.	.	II:292876-294019	WT	ksp1-KD	OK	151.564	227.058	0.583137	2.38042	0.0002	0.00103818	yes	1.4981	No
YCR107W_mRNA	YCR107W	YCR107W	.	.	III:313889-314981	WT	ksp1-KD	OK	11.1368	16.6664	0.581605	3.43526	5e-05	0.000294606	yes	1.49651	No
YHR034C_mRNA	YHR034C	YHR034C	.	.	VIII:176964-177999	WT	ksp1-KD	OK	22.8033	34.1246	0.581571	2.58485	5e-05	0.000294606	yes	1.49648	No
YNL070W_mRNA	YNL070W	YNL070W	.	.	XIV:493365-493548	WT	ksp1-KD	OK	650.129	972.693	0.581258	2.50325	5e-05	0.000294606	yes	1.49615	No
YEL020W-A_mRNA	YEL020W-A	YEL020W-A	.	.	V:117182-117474	WT	ksp1-KD	OK	499.313	746.779	0.580737	2.81806	5e-05	0.000294606	yes	1.49561	No
YPR184W_mRNA	YPR184W	YPR184W	.	.	XVI:902043-906654	WT	ksp1-KD	OK	14.7589	22.0481	0.579066	2.59868	5e-05	0.000294606	yes	1.49388	No
YLR273C_mRNA	YLR273C	YLR273C	.	.	XII:689082-691029	WT	ksp1-KD	OK	9.2137	13.759	0.57852	2.52893	5e-05	0.000294606	yes	1.49332	No
YFL017C_mRNA	YFL017C	YFL017C	.	.	VI:103982-104462	WT	ksp1-KD	OK	60.2689	89.98	0.578191	3.08116	5e-05	0.000294606	yes	1.49298	No
YMR251W_mRNA	YMR251W	YMR251W	.	.	XIII:772914-774015	WT	ksp1-KD	OK	9.41407	14.0546	0.578148	2.15788	0.00045	0.00216794	yes	1.49293	No
YGL243W_mRNA	YGL243W	YGL243W	.	.	VII:43306-44509	WT	ksp1-KD	OK	46.7131	69.7338	0.578032	3.1469	5e-05	0.000294606	yes	1.49281	No
YMR181C_mRNA	YMR181C	YMR181C	.	.	XIII:623615-624080	WT	ksp1-KD	OK	424.438	633.262	0.57725	2.98478	0.00015	0.000804996	yes	1.492	No
YPR042C_mRNA	YPR042C	YPR042C	.	.	XVI:650434-653662	WT	ksp1-KD	OK	7.574	11.2971	0.576825	3.49331	5e-05	0.000294606	yes	1.49156	No
YNL268W_mRNA	YNL268W	YNL268W	.	.	XIV:138549-140385	WT	ksp1-KD	OK	122.439	182.618	0.576768	2.28998	0.0005	0.00238233	yes	1.4915	No
YMR306W_mRNA	YMR306W	YMR306W	.	.	XIII:881158-886572	WT	ksp1-KD	OK	2.64006	3.93621	0.576236	2.32619	0.00015	0.000804996	yes	1.49095	No
YMR139W_mRNA	YMR139W	YMR139W	.	.	XIII:546124-547237	WT	ksp1-KD	OK	52.3026	77.9788	0.5762	2.80485	5e-05	0.000294606	yes	1.49092	No
YKL122C_mRNA	YKL122C	YKL122C	.	.	XI:212494-212998	WT	ksp1-KD	OK	97.2587	144.986	0.576018	4.62662	5e-05	0.000294606	yes	1.49073	No
YDR286C_mRNA	YDR286C	YDR286C	.	.	IV:1035230-1035575	WT	ksp1-KD	OK	62.493	93.1437	0.575763	2.10953	0.00045	0.00216794	yes	1.49047	No
YOL002C_mRNA	YOL002C	YOL002C	.	.	XV:323410-324364	WT	ksp1-KD	OK	128.133	190.975	0.57574	2.53765	5e-05	0.000294606	yes	1.49044	No
YJL199C_mRNA	YJL199C	YJL199C	.	.	X:59855-60182	WT	ksp1-KD	OK	44.8124	66.7895	0.575724	3.50985	0.0006	0.0027833	yes	1.49043	No
YNL006W_mRNA	YNL006W	YNL006W	.	.	XIV:620066-620978	WT	ksp1-KD	OK	99.7573	148.642	0.575342	3.86299	5e-05	0.000294606	yes	1.49003	No
YDR421W_mRNA	YDR421W	YDR421W	.	.	IV:1312039-1314892	WT	ksp1-KD	OK	19.8125	29.5056	0.574578	4.03789	5e-05	0.000294606	yes	1.48924	No
YBR255W_mRNA	YBR255W	YBR255W	.	.	II:724455-726540	WT	ksp1-KD	OK	26.8384	39.9576	0.574171	2.88233	5e-05	0.000294606	yes	1.48882	No
YLR432W_mRNA	YLR432W	YLR432W	.	.	XII:1002556-1004128	WT	ksp1-KD	OK	192.088	285.641	0.572437	2.22125	0.00085	0.00373758	yes	1.48703	No
YOR161C_mRNA	YOR161C	YOR161C	.	.	XV:636938-638558	WT	ksp1-KD	OK	21.4082	31.8287	0.572165	2.4861	5e-05	0.000294606	yes	1.48675	No
YGL152C_mRNA	YGL152C	YGL152C	.	.	VII:216272-217369	WT	ksp1-KD	OK	35.2823	52.4525	0.572069	3.21743	5e-05	0.000294606	yes	1.48665	No
YAL046C_mRNA	YAL046C	YAL046C	.	.	I:57028-57385	WT	ksp1-KD	OK	181.376	269.601	0.571845	2.59051	5e-05	0.000294606	yes	1.48642	No
YGR112W_mRNA	YGR112W	YGR112W	.	.	VII:717357-718527	WT	ksp1-KD	OK	20.003	29.7265	0.571538	2.7443	5e-05	0.000294606	yes	1.48611	No
YLR081W_mRNA	YLR081W	YLR081W	.	.	XII:290211-291936	WT	ksp1-KD	OK	5.55894	8.24063	0.567944	2.04959	0.0004	0.00194581	yes	1.48241	No
YDR007W_mRNA	YDR007W	YDR007W	.	.	IV:461841-462602	WT	ksp1-KD	OK	119.397	176.98	0.567818	3.84854	0.00135	0.00555998	yes	1.48228	No
YPL107W_mRNA	YPL107W	YPL107W	.	.	XVI:349118-349865	WT	ksp1-KD	OK	184.971	273.994	0.566849	4.29588	5e-05	0.000294606	yes	1.48128	No
YNL099C_mRNA	YNL099C	YNL099C	.	.	XIV:438566-439283	WT	ksp1-KD	OK	80.7852	119.635	0.566472	2.871	5e-05	0.000294606	yes	1.4809	No
YBR141C_mRNA	YBR141C	YBR141C	.	.	II:527024-528038	WT	ksp1-KD	OK	40.4803	59.9183	0.565777	2.68806	5e-05	0.000294606	yes	1.48018	No
YBR069C_mRNA	YBR069C	YBR069C	.	.	II:376573-378433	WT	ksp1-KD	OK	3.11256	4.60489	0.565064	1.86307	0.0014	0.00574044	yes	1.47945	No
YLR258W_mRNA	YLR258W	YLR258W	.	.	XII:660715-662833	WT	ksp1-KD	OK	48.5555	71.7953	0.564254	3.05264	5e-05	0.000294606	yes	1.47862	No
YBR258C_mRNA	YBR258C	YBR258C	.	.	II:729733-730162	WT	ksp1-KD	OK	178.372	263.587	0.563394	4.6013	0.0008	0.00354894	yes	1.47774	No
YEL039C_mRNA	YEL039C	YEL039C	.	.	V:79635-79977	WT	ksp1-KD	OK	872.816	1288.63	0.562091	4.70894	5e-05	0.000294606	yes	1.47641	No
YFR043C_mRNA	YFR043C	YFR043C	.	.	VI:239113-239827	WT	ksp1-KD	OK	54.8449	80.8477	0.55985	3.05249	5e-05	0.000294606	yes	1.47412	No
YOR052C_mRNA	YOR052C	YOR052C	.	.	XV:426771-427224	WT	ksp1-KD	OK	2754.35	4059.23	0.559494	3.27258	0.0007	0.00317245	yes	1.47375	No
YFL042C_mRNA	YFL042C	YFL042C	.	.	VI:45719-47744	WT	ksp1-KD	OK	37.2499	54.89	0.559305	2.57634	5e-05	0.000294606	yes	1.47356	No
YLR316C_mRNA	YLR316C	YLR316C	.	.	XII:764807-766358	WT	ksp1-KD	OK	36.0034	53.0453	0.559094	2.21885	0.0018	0.00708123	yes	1.47334	No
YLR304C_mRNA	YLR304C	YLR304C	.	.	XII:735211-737548	WT	ksp1-KD	OK	339.859	500.699	0.559007	1.90504	0.00315	0.0113355	yes	1.47325	No
YBL076C_mRNA	YBL076C	YBL076C	.	.	II:80896-84261	WT	ksp1-KD	OK	229.625	338.215	0.558665	1.91735	0.00185	0.0072385	yes	1.47291	No
YKL137W_mRNA	YKL137W	YKL137W	.	.	XI:185956-186292	WT	ksp1-KD	OK	117.172	172.567	0.55853	2.27435	0.00015	0.000804996	yes	1.47277	No
YJR057W_mRNA	YJR057W	YJR057W	.	.	X:544061-544712	WT	ksp1-KD	OK	79.4896	116.968	0.557279	3.24361	5e-05	0.000294606	yes	1.47149	No
YDR085C_mRNA	YDR085C	YDR085C	.	.	IV:614287-616150	WT	ksp1-KD	OK	12.8447	18.8933	0.556701	2.57778	5e-05	0.000294606	yes	1.4709	No
YHR116W_mRNA	YHR116W	YHR116W	.	.	VIII:341664-342120	WT	ksp1-KD	OK	17.6156	25.8985	0.556011	1.86675	0.00145	0.0059156	yes	1.4702	No
YJL160C_mRNA	YJL160C	YJL160C	.	.	X:117961-118825	WT	ksp1-KD	OK	2.62749	3.86187	0.555615	1.51844	0.00725	0.0230067	yes	1.4698	No
YBR296C_mRNA	YBR296C	YBR296C	.	.	II:796797-798522	WT	ksp1-KD	OK	1.15348	1.69478	0.555098	1.44124	0.01355	0.0386234	yes	1.46927	No
YBL059W_mRNA	YBL059W	YBL059W	.	.	II:110593-111244	WT	ksp1-KD	OK	52.1466	76.6134	0.555023	2.32823	0.00015	0.000804996	yes	1.46919	No
YBR034C_mRNA	YBR034C	YBR034C	.	.	II:304929-305976	WT	ksp1-KD	OK	189.432	278.257	0.554738	2.5977	5e-05	0.000294606	yes	1.4689	No
YDR066C_mRNA	YDR066C	YDR066C	.	.	IV:581907-582498	WT	ksp1-KD	OK	82.9702	121.858	0.554532	3.13883	5e-05	0.000294606	yes	1.46869	No
YDL186W_mRNA	YDL186W	YDL186W	.	.	IV:125508-126449	WT	ksp1-KD	OK	16.7803	24.6318	0.553752	2.22593	0.0001	0.000557854	yes	1.4679	No
YBL101C_mRNA	YBL101C	YBL101C	.	.	II:24945-28299	WT	ksp1-KD	OK	21.6686	31.8019	0.553507	2.68288	5e-05	0.000294606	yes	1.46765	No
YBR193C_mRNA	YBR193C	YBR193C	.	.	II:609081-609753	WT	ksp1-KD	OK	41.4684	60.832	0.55282	2.81436	5e-05	0.000294606	yes	1.46695	No
YDR481C_mRNA	YDR481C	YDR481C	.	.	IV:1418549-1420250	WT	ksp1-KD	OK	231.005	338.839	0.552679	1.94775	0.00085	0.00373758	yes	1.46681	No
YNL305C_mRNA	YNL305C	YNL305C	.	.	XIV:58897-59791	WT	ksp1-KD	OK	65.5882	96.1875	0.552414	3.47087	5e-05	0.000294606	yes	1.46654	No
YHR020W_mRNA	YHR020W	YHR020W	.	.	VIII:143995-146062	WT	ksp1-KD	OK	134.123	196.395	0.550204	1.99778	0.00095	0.00409691	yes	1.46429	No
YIL022W_mRNA	YIL022W	YIL022W	.	.	IX:311164-312460	WT	ksp1-KD	OK	108.534	158.91	0.550062	2.66667	5e-05	0.000294606	yes	1.46415	No
YOR258W_mRNA	YOR258W	YOR258W	.	.	XV:811670-812324	WT	ksp1-KD	OK	38.6541	56.5625	0.549222	2.64755	0.0002	0.00103818	yes	1.4633	No
YHR078W_mRNA	YHR078W	YHR078W	.	.	VIII:256359-258018	WT	ksp1-KD	OK	33.6336	49.2121	0.549112	2.81151	5e-05	0.000294606	yes	1.46318	No
YGR281W_mRNA	YGR281W	YGR281W	.	.	VII:1052823-1057257	WT	ksp1-KD	OK	24.5083	35.8538	0.548853	2.48265	5e-05	0.000294606	yes	1.46292	No
YLR363C_mRNA	YLR363C	YLR363C	.	.	XII:852494-853151	WT	ksp1-KD	OK	79.2008	115.848	0.548644	4.67616	0.0001	0.000557854	yes	1.46271	No
YBR058C-A_mRNA	YBR058C-A	YBR058C-A	.	.	II:356323-356566	WT	ksp1-KD	OK	719.097	1050.87	0.54732	2.63574	5e-05	0.000294606	yes	1.46137	No
YGL047W_mRNA	YGL047W	YGL047W	.	.	VII:411551-412160	WT	ksp1-KD	OK	91.2576	133.33	0.54698	3.09292	5e-05	0.000294606	yes	1.46102	No
YDR538W_mRNA	YDR538W	YDR538W	.	.	IV:1510855-1511630	WT	ksp1-KD	OK	23.8633	34.8402	0.545959	2.75682	0.0001	0.000557854	yes	1.45999	No
YOR163W_mRNA	YOR163W	YOR163W	.	.	XV:642740-643307	WT	ksp1-KD	OK	180.357	263.312	0.545921	3.23953	5e-05	0.000294606	yes	1.45995	No
YLR356W_mRNA	YLR356W	YLR356W	.	.	XII:840320-840914	WT	ksp1-KD	OK	125.096	182.597	0.545625	3.25636	5e-05	0.000294606	yes	1.45965	No
YGL131C_mRNA	YGL131C	YGL131C	.	.	VII:261579-265859	WT	ksp1-KD	OK	10.6819	15.591	0.545537	2.6059	5e-05	0.000294606	yes	1.45956	No
YMR147W_mRNA	YMR147W	YMR147W	.	.	XIII:559198-559870	WT	ksp1-KD	OK	20.0841	29.3041	0.54505	4.58391	0.00025	0.00126538	yes	1.45907	No
YPR093C_mRNA	YPR093C	YPR093C	.	.	XVI:719557-720424	WT	ksp1-KD	OK	51.1129	74.5562	0.544639	3.12	5e-05	0.000294606	yes	1.45866	No
YDR031W_mRNA	YDR031W	YDR031W	.	.	IV:503497-503863	WT	ksp1-KD	OK	329.702	480.917	0.544626	4.1447	0.0002	0.00103818	yes	1.45864	No
YNL230C_mRNA	YNL230C	YNL230C	.	.	XIV:217522-218662	WT	ksp1-KD	OK	19.5391	28.4734	0.543251	2.65374	5e-05	0.000294606	yes	1.45725	No
YOR343C_mRNA	YOR343C	YOR343C	.	.	XV:968147-968474	WT	ksp1-KD	OK	24.5889	35.8296	0.543145	1.73414	0.008	0.0248409	yes	1.45715	No
YHR019C_mRNA	YHR019C	YHR019C	.	.	VIII:141893-143558	WT	ksp1-KD	OK	313.567	456.531	0.541938	1.81179	0.0026	0.00967778	yes	1.45593	No
YGR212W_mRNA	YGR212W	YGR212W	.	.	VII:917039-918446	WT	ksp1-KD	OK	20.858	30.3632	0.541725	2.52031	5e-05	0.000294606	yes	1.45571	No
YNR036C_mRNA	YNR036C	YNR036C	.	.	XIV:694360-694822	WT	ksp1-KD	OK	256.275	373.054	0.541691	3.06701	5e-05	0.000294606	yes	1.45568	No
YDL069C_mRNA	YDL069C	YDL069C	.	.	IV:333120-333829	WT	ksp1-KD	OK	60.3315	87.79	0.541146	2.20002	0.0008	0.00354894	yes	1.45513	No
YPL119C_mRNA	YPL119C	YPL119C	.	.	XVI:324410-326264	WT	ksp1-KD	OK	14.909	21.6832	0.540389	2.57748	5e-05	0.000294606	yes	1.45436	No
YCR024C_mRNA	YCR024C	YCR024C	.	.	III:160743-162222	WT	ksp1-KD	OK	21.2367	30.8853	0.540362	2.74776	5e-05	0.000294606	yes	1.45434	No
YLR011W_mRNA	YLR011W	YLR011W	.	.	XII:169102-169678	WT	ksp1-KD	OK	72.1044	104.846	0.540106	2.52937	0.0001	0.000557854	yes	1.45408	No
YBR229C_mRNA	YBR229C	YBR229C	.	.	II:676356-679221	WT	ksp1-KD	OK	14.9258	21.703	0.540089	2.79238	5e-05	0.000294606	yes	1.45406	No
YLR453C_mRNA	YLR453C	YLR453C	.	.	XII:1041798-1042986	WT	ksp1-KD	OK	13.0227	18.9336	0.539922	2.26614	0.00015	0.000804996	yes	1.45389	No
YBR065C_mRNA	YBR065C	YBR065C	.	.	II:368583-369678	WT	ksp1-KD	OK	28.2515	41.073	0.539864	2.49406	0.0002	0.00103818	yes	1.45384	No
YLR411W_mRNA	YLR411W	YLR411W	.	.	XII:947252-947978	WT	ksp1-KD	OK	21.146	30.7396	0.539714	2.27988	0.0001	0.000557854	yes	1.45368	No
YLL016W	YLL016W	YLL016W	.	.	XII:112846-115993	WT	ksp1-KD	OK	8.12168	11.8036	0.53938	2.49741	5e-05	0.000294606	yes	1.45335	No
YOR136W_mRNA	YOR136W	YOR136W	.	.	XV:580158-581359	WT	ksp1-KD	OK	540.367	785.283	0.539274	1.76281	0.0029	0.0105586	yes	1.45324	No
YOR294W_mRNA	YOR294W	YOR294W	.	.	XV:868339-868951	WT	ksp1-KD	OK	190.22	276.424	0.539211	2.50293	5e-05	0.000294606	yes	1.45318	No
YLR088W_mRNA	YLR088W	YLR088W	.	.	XII:316106-317951	WT	ksp1-KD	OK	20.6059	29.9392	0.538978	2.94304	5e-05	0.000294606	yes	1.45294	No
YHR005C_mRNA	YHR005C	YHR005C	.	.	VIII:113498-114917	WT	ksp1-KD	OK	19.4747	28.2894	0.538657	3.45089	0.00055	0.00257711	yes	1.45262	No
YPL078C_mRNA	YPL078C	YPL078C	.	.	XVI:408009-408744	WT	ksp1-KD	OK	347.598	504.915	0.53862	2.13616	0.00045	0.00216794	yes	1.45258	No
YGL262W_mRNA	YGL262W	YGL262W	.	.	VII:5311-5839	WT	ksp1-KD	OK	25.7515	37.4025	0.538476	2.43413	0.0085	0.0261189	yes	1.45244	No
YIL155C_mRNA	YIL155C	YIL155C	.	.	IX:51758-53708	WT	ksp1-KD	OK	64.849	94.178	0.538305	2.59326	0.00035	0.00171801	yes	1.45227	No
YPR005C_mRNA	YPR005C	YPR005C	.	.	XVI:565786-566671	WT	ksp1-KD	OK	21.4781	31.1786	0.53769	2.27168	0.0001	0.000557854	yes	1.45165	No
YIL059C_mRNA	YIL059C	YIL059C	.	.	IX:246391-247198	WT	ksp1-KD	OK	153.712	223.114	0.537556	2.01577	0.0008	0.00354894	yes	1.45151	No
YPL047W_mRNA	YPL047W	YPL047W	.	.	XVI:465961-466261	WT	ksp1-KD	OK	240.222	348.626	0.53731	2.40095	0.0001	0.000557854	yes	1.45126	No
YKL012W_mRNA	YKL012W	YKL012W	.	.	XI:418309-420061	WT	ksp1-KD	OK	43.9484	63.7558	0.536747	3.23291	5e-05	0.000294606	yes	1.4507	No
YPR133W-A_mRNA	YPR133W-A	YPR133W-A	.	.	XVI:797556-797709	WT	ksp1-KD	OK	1024.16	1485.11	0.536134	2.54837	0.0027	0.00994181	yes	1.45008	No
YER071C_mRNA	YER071C	YER071C	.	.	V:301946-302327	WT	ksp1-KD	OK	84.3744	122.294	0.53548	2.52543	0.0001	0.000557854	yes	1.44942	No
YNL046W_mRNA	YNL046W	YNL046W	.	.	XIV:542303-542822	WT	ksp1-KD	OK	92.1834	133.479	0.534034	2.48419	5e-05	0.000294606	yes	1.44797	No
YPL046C_mRNA	YPL046C	YPL046C	.	.	XVI:466643-466943	WT	ksp1-KD	OK	126.356	182.882	0.533422	3.40932	0.00175	0.00690543	yes	1.44736	No
YBR008C_mRNA	YBR008C	YBR008C	.	.	II:252562-254209	WT	ksp1-KD	OK	47.7529	69.0862	0.532809	2.52036	5e-05	0.000294606	yes	1.44674	No
YGR166W_mRNA	YGR166W	YGR166W	.	.	VII:830514-832197	WT	ksp1-KD	OK	15.7793	22.8276	0.532742	2.46347	5e-05	0.000294606	yes	1.44668	No
YER121W_mRNA	YER121W	YER121W	.	.	V:402374-402719	WT	ksp1-KD	OK	64.7365	93.5786	0.531599	1.96436	0.0015	0.00608141	yes	1.44553	No
YPR067W_mRNA	YPR067W	YPR067W	.	.	XVI:682219-682777	WT	ksp1-KD	OK	31.7944	45.9462	0.531172	2.71394	5e-05	0.000294606	yes	1.4451	No
YKL049C_mRNA	YKL049C	YKL049C	.	.	XI:346074-346764	WT	ksp1-KD	OK	201.405	290.527	0.52857	4.98664	5e-05	0.000294606	yes	1.4425	No
YOR007C_mRNA	YOR007C	YOR007C	.	.	XV:338937-339978	WT	ksp1-KD	OK	1042.54	1503.85	0.528555	2.36948	0.00275	0.0100859	yes	1.44248	No
YJR082C_mRNA	YJR082C	YJR082C	.	.	X:581913-582255	WT	ksp1-KD	OK	337.452	486.721	0.528415	2.5279	5e-05	0.000294606	yes	1.44234	No
YEL062W_mRNA	YEL062W	YEL062W	.	.	V:34406-36254	WT	ksp1-KD	OK	25.8945	37.3481	0.52839	2.99383	5e-05	0.000294606	yes	1.44232	No
YER137C_mRNA	YER137C	YER137C	.	.	V:441372-441880	WT	ksp1-KD	OK	51.6677	74.4871	0.527726	1.90045	0.0118	0.0343431	yes	1.44166	No
YFR034C_mRNA	YFR034C	YFR034C	.	.	VI:225019-225958	WT	ksp1-KD	OK	33.6083	48.4436	0.527489	2.72876	5e-05	0.000294606	yes	1.44142	No
YJL062W-A_mRNA	YJL062W-A	YJL062W-A	.	.	X:316722-316980	WT	ksp1-KD	OK	142.365	205.179	0.527294	1.95354	0.00095	0.00409691	yes	1.44122	No
YFL034C-A_mRNA	YFL034C-A	YFL034C-A	.	.	VI:64242-64932	WT	ksp1-KD	OK	554.752	799.392	0.52706	2.26481	0.0001	0.000557854	yes	1.44099	No
YBR153W_mRNA	YBR153W	YBR153W	.	.	II:547459-548194	WT	ksp1-KD	OK	95.4683	137.543	0.526787	2.94023	5e-05	0.000294606	yes	1.44072	No
YCR028C_mRNA	YCR028C	YCR028C	.	.	III:170885-172424	WT	ksp1-KD	OK	53.5337	77.107	0.526413	3.02918	5e-05	0.000294606	yes	1.44034	No
YDR068W_mRNA	YDR068W	YDR068W	.	.	IV:583712-584645	WT	ksp1-KD	OK	287.791	414.335	0.525777	5.20994	5e-05	0.000294606	yes	1.43971	No
YLR298C_mRNA	YLR298C	YLR298C	.	.	XII:724720-725416	WT	ksp1-KD	OK	95.4507	137.383	0.52538	2.83695	5e-05	0.000294606	yes	1.43931	No
YOL049W_mRNA	YOL049W	YOL049W	.	.	XV:238618-240094	WT	ksp1-KD	OK	85.3328	122.796	0.525097	2.38733	0.00025	0.00126538	yes	1.43903	No
YKL082C_mRNA	YKL082C	YKL082C	.	.	XI:280920-282329	WT	ksp1-KD	OK	226.385	325.733	0.524913	4.83076	0.0001	0.000557854	yes	1.43885	No
YML098W_mRNA	YML098W	YML098W	.	.	XIII:77266-77770	WT	ksp1-KD	OK	258.723	372.145	0.524455	2.58685	5e-05	0.000294606	yes	1.43839	No
YGR061C_mRNA	YGR061C	YGR061C	.	.	VII:611888-615965	WT	ksp1-KD	OK	104.473	150.269	0.524423	1.86526	0.00225	0.00854632	yes	1.43836	No
YDR231C_mRNA	YDR231C	YDR231C	.	.	IV:926222-926910	WT	ksp1-KD	OK	59.1145	84.9804	0.523618	2.45537	0.0002	0.00103818	yes	1.43756	No
YAL008W_mRNA	YAL008W	YAL008W	.	.	I:136913-137510	WT	ksp1-KD	OK	127.41	183.086	0.52304	3.49642	5e-05	0.000294606	yes	1.43698	No
YDL181W_mRNA	YDL181W	YDL181W	.	.	IV:135178-135436	WT	ksp1-KD	OK	634.36	911.486	0.522918	3.14417	5e-05	0.000294606	yes	1.43686	No
YLR245C_mRNA	YLR245C	YLR245C	.	.	XII:626501-626930	WT	ksp1-KD	OK	63.5665	91.3235	0.522721	2.37222	0.00035	0.00171801	yes	1.43666	No
YLR147C_mRNA	YLR147C	YLR147C	.	.	XII:434157-434463	WT	ksp1-KD	OK	256.935	368.866	0.521697	3.41919	5e-05	0.000294606	yes	1.43564	No
YCL049C_mRNA	YCL049C	YCL049C	.	.	III:39785-40724	WT	ksp1-KD	OK	31.2109	44.8037	0.521569	2.60197	5e-05	0.000294606	yes	1.43552	No
YOL154W_mRNA	YOL154W	YOL154W	.	.	XV:34657-35407	WT	ksp1-KD	OK	18.5043	26.5489	0.520788	2.47875	0.00055	0.00257711	yes	1.43474	No
YGL036W_mRNA	YGL036W	YGL036W	.	.	VII:428600-431330	WT	ksp1-KD	OK	11.6453	16.7076	0.52075	2.56458	5e-05	0.000294606	yes	1.4347	No
YDR080W_mRNA	YDR080W	YDR080W	.	.	IV:604007-606986	WT	ksp1-KD	OK	31.6761	45.4099	0.519612	2.41203	0.00015	0.000804996	yes	1.43357	No
YOL133W_mRNA	YOL133W	YOL133W	.	.	XV:70155-70690	WT	ksp1-KD	OK	234.42	335.632	0.517785	2.59395	5e-05	0.000294606	yes	1.43176	No
YJR035W_mRNA	YJR035W	YJR035W	.	.	X:497354-500612	WT	ksp1-KD	OK	19.7436	28.2645	0.517604	2.81303	5e-05	0.000294606	yes	1.43158	No
YDR349C_mRNA	YDR349C	YDR349C	.	.	IV:1172385-1174176	WT	ksp1-KD	OK	62.5667	89.5643	0.517529	2.2882	5e-05	0.000294606	yes	1.4315	No
YCR020C-A_mRNA	YCR020C-A	YCR020C-A	.	.	III:154829-155096	WT	ksp1-KD	OK	679.939	973.07	0.517137	4.63455	5e-05	0.000294606	yes	1.43111	No
YDR371W_mRNA	YDR371W	YDR371W	.	.	IV:1219412-1220948	WT	ksp1-KD	OK	26.0487	37.2703	0.516817	2.41809	0.0001	0.000557854	yes	1.4308	No
YDL111C_mRNA	YDL111C	YDL111C	.	.	IV:263312-264110	WT	ksp1-KD	OK	115.245	164.845	0.5164	2.39569	5e-05	0.000294606	yes	1.43038	No
YDR043C_mRNA	YDR043C	YDR043C	.	.	IV:542673-543369	WT	ksp1-KD	OK	43.6889	62.4706	0.515911	2.44654	5e-05	0.000294606	yes	1.4299	No
YOR308C_mRNA	YOR308C	YOR308C	.	.	XV:894623-896387	WT	ksp1-KD	OK	13.4442	19.2207	0.515684	4.19578	5e-05	0.000294606	yes	1.42967	No
YML028W_mRNA	YML028W	YML028W	.	.	XIII:220137-220728	WT	ksp1-KD	OK	1165.33	1665.55	0.515259	1.83237	0.00495	0.0166857	yes	1.42925	No
YDR363W-A_mRNA	YDR363W-A	YDR363W-A	.	.	IV:1202127-1202397	WT	ksp1-KD	OK	2072.16	2960.18	0.514549	2.98917	5e-05	0.000294606	yes	1.42855	No
YHR206W_mRNA	YHR206W	YHR206W	.	.	VIII:512731-514600	WT	ksp1-KD	OK	38.8276	55.451	0.514131	3.38731	0.0001	0.000557854	yes	1.42813	No
YOR319W_mRNA	YOR319W	YOR319W	.	.	XV:912821-913463	WT	ksp1-KD	OK	152.715	218.075	0.513981	3.14816	5e-05	0.000294606	yes	1.42799	No
YMR286W_mRNA	YMR286W	YMR286W	.	.	XIII:841941-842202	WT	ksp1-KD	OK	260.628	371.979	0.513226	2.44984	0.0001	0.000557854	yes	1.42724	No
YER047C_mRNA	YER047C	YER047C	.	.	V:243699-246503	WT	ksp1-KD	OK	17.9524	25.6166	0.512905	2.63105	5e-05	0.000294606	yes	1.42692	No
YOR236W_mRNA	YOR236W	YOR236W	.	.	XV:780905-781541	WT	ksp1-KD	OK	70.9227	101.176	0.512553	5.40111	0.0001	0.000557854	yes	1.42657	No
YKL206C_mRNA	YKL206C	YKL206C	.	.	XI:49005-49809	WT	ksp1-KD	OK	86.6544	123.609	0.512433	2.66954	0.0001	0.000557854	yes	1.42645	No
YDR530C_mRNA	YDR530C	YDR530C	.	.	IV:1496790-1497768	WT	ksp1-KD	OK	32.6165	46.5083	0.511884	2.44879	5e-05	0.000294606	yes	1.42591	No
YLR073C_mRNA	YLR073C	YLR073C	.	.	XII:281018-281621	WT	ksp1-KD	OK	56.3712	80.3774	0.511832	2.30788	0.0001	0.000557854	yes	1.42586	No
YKR085C_mRNA	YKR085C	YKR085C	.	.	XI:599093-599681	WT	ksp1-KD	OK	52.0991	74.2025	0.510211	2.73087	0.00015	0.000804996	yes	1.42426	No
YHR194W_mRNA	YHR194W	YHR194W	.	.	VIII:488652-490396	WT	ksp1-KD	OK	14.6756	20.9007	0.510136	3.38055	5e-05	0.000294606	yes	1.42418	No
YGL229C_mRNA	YGL229C	YGL229C	.	.	VII:64502-66959	WT	ksp1-KD	OK	4.10781	5.84676	0.509268	1.85419	0.00165	0.00659493	yes	1.42333	No
YOR228C_mRNA	YOR228C	YOR228C	.	.	XV:766868-767777	WT	ksp1-KD	OK	53.3949	75.9334	0.508031	2.61186	5e-05	0.000294606	yes	1.42211	No
YNL306W_mRNA	YNL306W	YNL306W	.	.	XIV:58154-58808	WT	ksp1-KD	OK	165.309	235.019	0.507608	3.32147	5e-05	0.000294606	yes	1.42169	No
YNL277W_mRNA	YNL277W	YNL277W	.	.	XIV:117348-118826	WT	ksp1-KD	OK	60.508	86.0202	0.50755	1.82668	0.00205	0.00790211	yes	1.42163	No
YKL063C_mRNA	YKL063C	YKL063C	.	.	XI:321014-321518	WT	ksp1-KD	OK	309.412	439.347	0.505834	3.99491	5e-05	0.000294606	yes	1.41994	No
YMR251W-A_mRNA	YMR251W-A	YMR251W-A	.	.	XIII:774751-774931	WT	ksp1-KD	OK	4755.57	6749.11	0.50508	2.17994	0.0011	0.0046603	yes	1.4192	No
YOR179C_mRNA	YOR179C	YOR179C	.	.	XV:671844-672411	WT	ksp1-KD	OK	151.154	214.507	0.505002	3.87648	5e-05	0.000294606	yes	1.41913	No
YGR161C_mRNA	YGR161C	YGR161C	.	.	VII:808628-809420	WT	ksp1-KD	OK	274.939	390.016	0.504421	2.0253	0.00135	0.00555998	yes	1.41855	No
YMR020W_mRNA	YMR020W	YMR020W	.	.	XIII:315376-316903	WT	ksp1-KD	OK	54.3639	77.0964	0.504015	2.38916	5e-05	0.000294606	yes	1.41815	No
YLR163C_mRNA	YLR163C	YLR163C	.	.	XII:491865-493254	WT	ksp1-KD	OK	48.726	69.0936	0.503859	4.78698	0.0001	0.000557854	yes	1.418	No
YDR145W_mRNA	YDR145W	YDR145W	.	.	IV:746737-748357	WT	ksp1-KD	OK	60.659	86.0032	0.503669	2.50677	0.0001	0.000557854	yes	1.41781	No
YGR263C_mRNA	YGR263C	YGR263C	.	.	VII:1017966-1019241	WT	ksp1-KD	OK	13.1352	18.6172	0.5032	3.44977	0.0002	0.00103818	yes	1.41735	No
YIL042C_mRNA	YIL042C	YIL042C	.	.	IX:275107-276292	WT	ksp1-KD	OK	53.4332	75.7251	0.503034	2.70423	0.00015	0.000804996	yes	1.41719	No
YDR523C_mRNA	YDR523C	YDR523C	.	.	IV:1485565-1487038	WT	ksp1-KD	OK	2.95833	4.18945	0.501979	1.56612	0.00815	0.0252343	yes	1.41615	No
YDR079C-A_mRNA	YDR079C-A	YDR079C-A	.	.	IV:603592-603811	WT	ksp1-KD	OK	299.168	423.531	0.501511	2.02369	0.0031	0.0111927	yes	1.4157	No
YER179W_mRNA	YER179W	YER179W	.	.	V:548420-549517	WT	ksp1-KD	OK	16.5044	23.3642	0.501443	1.91009	0.00195	0.00759775	yes	1.41563	No
YPR083W_mRNA	YPR083W	YPR083W	.	.	XVI:704853-706593	WT	ksp1-KD	OK	20.3642	28.8208	0.501073	3.46928	5e-05	0.000294606	yes	1.41527	No
YHR038W_mRNA	YHR038W	YHR038W	.	.	VIII:184065-184758	WT	ksp1-KD	OK	18.6322	26.3685	0.501019	2.00115	0.0017	0.00674088	yes	1.41521	No
YKL138C_mRNA	YKL138C	YKL138C	.	.	XI:185285-185681	WT	ksp1-KD	OK	115.913	164.041	0.501012	2.92992	5e-05	0.000294606	yes	1.41521	No
YDR262W_mRNA	YDR262W	YDR262W	.	.	IV:993133-993952	WT	ksp1-KD	OK	368.28	520.916	0.500248	2.70387	0.00045	0.00216794	yes	1.41446	No
YOR071C_mRNA	YOR071C	YOR071C	.	.	XV:459479-461276	WT	ksp1-KD	OK	7.85059	11.1036	0.500152	2.18517	0.00035	0.00171801	yes	1.41436	No
YPR002C-A_mRNA	YPR002C-A	YPR002C-A	.	.	XVI:560568-560766	WT	ksp1-KD	OK	656.408	928.191	0.499829	1.97818	0.00075	0.00336852	yes	1.41405	No
YOR128C_mRNA	YOR128C	YOR128C	.	.	XV:564475-566191	WT	ksp1-KD	OK	77.9174	110.004	0.497536	2.14409	0.00015	0.000804996	yes	1.4118	No
YOR338W_mRNA	YOR338W	YOR338W	.	.	XV:956897-957989	WT	ksp1-KD	OK	255.713	360.997	0.49746	1.837	0.00155	0.00624516	yes	1.41173	No
YGL108C_mRNA	YGL108C	YGL108C	.	.	VII:303512-304071	WT	ksp1-KD	OK	98.7377	139.289	0.496405	2.03033	0.0008	0.00354894	yes	1.41069	No
YNL165W_mRNA	YNL165W	YNL165W	.	.	XIV:323831-325052	WT	ksp1-KD	OK	24.6066	34.7049	0.49609	2.41483	0.0001	0.000557854	yes	1.41039	No
YBL029C-A_mRNA	YBL029C-A	YBL029C-A	.	.	II:164487-164772	WT	ksp1-KD	OK	479.913	676.845	0.496054	2.6857	5e-05	0.000294606	yes	1.41035	No
YOL010W_mRNA	YOL010W	YOL010W	.	.	XV:307937-309041	WT	ksp1-KD	OK	58.4733	82.4517	0.495772	2.36424	0.00025	0.00126538	yes	1.41008	No
YJL139C_mRNA	YJL139C	YJL139C	.	.	X:151712-152999	WT	ksp1-KD	OK	32.1303	45.2908	0.495281	2.64117	5e-05	0.000294606	yes	1.4096	No
YPL147W_mRNA	YPL147W	YPL147W	.	.	XVI:273254-275867	WT	ksp1-KD	OK	4.4854	6.31911	0.494484	1.83661	0.00185	0.0072385	yes	1.40882	No
YBR230C_mRNA	YBR230C	YBR230C	.	.	II:679548-680050	WT	ksp1-KD	OK	327.918	461.85	0.494089	2.29878	5e-05	0.000294606	yes	1.40843	No
YGR079W_mRNA	YGR079W	YGR079W	.	.	VII:640719-641832	WT	ksp1-KD	OK	90.4999	127.451	0.493949	2.2467	0.0003	0.00149174	yes	1.40829	No
YKL025C_mRNA	YKL025C	YKL025C	.	.	XI:390239-392279	WT	ksp1-KD	OK	27.0108	38.0385	0.493922	3.48321	5e-05	0.000294606	yes	1.40827	No
YOL025W_mRNA	YOL025W	YOL025W	.	.	XV:274956-276939	WT	ksp1-KD	OK	24.1187	33.9621	0.493775	2.38216	5e-05	0.000294606	yes	1.40812	No
YGL191W_mRNA	YGL191W	YGL191W	.	.	VII:144807-145197	WT	ksp1-KD	OK	935.683	1316.3	0.492393	2.0618	0.00105	0.0044806	yes	1.40678	No
YGR251W_mRNA	YGR251W	YGR251W	.	.	VII:995638-996229	WT	ksp1-KD	OK	70.4986	99.1615	0.492186	2.60031	0.0002	0.00103818	yes	1.40657	No
YPL270W_mRNA	YPL270W	YPL270W	.	.	XVI:30481-32803	WT	ksp1-KD	OK	33.5292	47.1317	0.49128	2.42501	5e-05	0.000294606	yes	1.40569	No
YNL129W_mRNA	YNL129W	YNL129W	.	.	XIV:381479-382202	WT	ksp1-KD	OK	487.29	684.813	0.49093	2.0092	0.00115	0.00485315	yes	1.40535	No
YJL210W_mRNA	YJL210W	YJL210W	.	.	X:36756-37734	WT	ksp1-KD	OK	62.2293	87.4449	0.49078	2.31856	5e-05	0.000294606	yes	1.4052	No
YGL234W_mRNA	YGL234W	YGL234W	.	.	VII:56481-58890	WT	ksp1-KD	OK	111.893	157.171	0.490217	1.76226	0.0024	0.00903685	yes	1.40466	No
YLR019W_mRNA	YLR019W	YLR019W	.	.	XII:180287-181481	WT	ksp1-KD	OK	62.6787	87.9479	0.488675	2.24808	0.00025	0.00126538	yes	1.40316	No
YPL168W_mRNA	YPL168W	YPL168W	.	.	XVI:231216-232509	WT	ksp1-KD	OK	47.8594	67.1369	0.488303	2.43427	5e-05	0.000294606	yes	1.40279	No
YDL178W_mRNA	YDL178W	YDL178W	.	.	IV:139521-141114	WT	ksp1-KD	OK	126.37	177.23	0.487974	4.18147	5e-05	0.000294606	yes	1.40247	No
YKR101W_mRNA	YKR101W	YKR101W	.	.	XI:640539-642504	WT	ksp1-KD	OK	20.4331	28.6556	0.487908	2.44965	0.0001	0.000557854	yes	1.40241	No
YIR011C_mRNA	YIR011C	YIR011C	.	.	IX:377286-378246	WT	ksp1-KD	OK	128.102	179.644	0.487851	2.73393	0.00015	0.000804996	yes	1.40235	No
YDL177C_mRNA	YDL177C	YDL177C	.	.	IV:141208-141721	WT	ksp1-KD	OK	52.3977	73.4783	0.487813	1.91223	0.00125	0.00521757	yes	1.40232	No
YOR192C_mRNA	YOR192C	YOR192C	.	.	XV:698767-700567	WT	ksp1-KD	OK	5.92018	8.30182	0.487785	2.32043	0.00105	0.0044806	yes	1.40229	No
YBR005W_mRNA	YBR005W	YBR005W	.	.	II:245905-246547	WT	ksp1-KD	OK	216.17	303.121	0.487726	3.03885	0.0001	0.000557854	yes	1.40223	No
YJR101W_mRNA	YJR101W	YJR101W	.	.	X:618233-619034	WT	ksp1-KD	OK	62.3017	87.3594	0.487692	2.64426	5e-05	0.000294606	yes	1.4022	No
YDR323C_mRNA	YDR323C	YDR323C	.	.	IV:1112479-1114027	WT	ksp1-KD	OK	24.3736	34.1647	0.48719	2.37402	0.00015	0.000804996	yes	1.40171	No
YOL158C_mRNA	YOL158C	YOL158C	.	.	XV:19490-21311	WT	ksp1-KD	OK	43.1795	60.4921	0.486401	2.33506	5e-05	0.000294606	yes	1.40095	No
YMR150C_mRNA	YMR150C	YMR150C	.	.	XIII:561955-562943	WT	ksp1-KD	OK	119.79	167.809	0.486311	2.47013	0.0001	0.000557854	yes	1.40086	No
YJL206C_mRNA	YJL206C	YJL206C	.	.	X:47658-49935	WT	ksp1-KD	OK	13.0205	18.2397	0.486299	2.56596	5e-05	0.000294606	yes	1.40085	No
YPL052W_mRNA	YPL052W	YPL052W	.	.	XVI:458798-459678	WT	ksp1-KD	OK	99.3349	139.145	0.486214	2.32976	5e-05	0.000294606	yes	1.40076	No
YBR103W_mRNA	YBR103W	YBR103W	.	.	II:447708-449316	WT	ksp1-KD	OK	98.4983	137.95	0.485975	4.55559	5e-05	0.000294606	yes	1.40053	No
YLR104W_mRNA	YLR104W	YLR104W	.	.	XII:346584-346980	WT	ksp1-KD	OK	49.6619	69.5396	0.485694	2.44826	0.00015	0.000804996	yes	1.40026	No
YHR124W_mRNA	YHR124W	YHR124W	.	.	VIII:356560-358444	WT	ksp1-KD	OK	8.80133	12.3139	0.484497	2.2867	0.0008	0.00354894	yes	1.3991	No
YBR137W_mRNA	YBR137W	YBR137W	.	.	II:513043-513583	WT	ksp1-KD	OK	299.254	418.626	0.48429	3.09025	0.0001	0.000557854	yes	1.3989	No
YCR105W_mRNA	YCR105W	YCR105W	.	.	III:309069-310155	WT	ksp1-KD	OK	9.70176	13.5651	0.483582	2.34754	0.00195	0.00759775	yes	1.39821	No
YOL055C_mRNA	YOL055C	YOL055C	.	.	XV:224419-226075	WT	ksp1-KD	OK	47.7185	66.7024	0.483189	2.39245	5e-05	0.000294606	yes	1.39783	No
YLL061W_mRNA	YLL061W	YLL061W	.	.	XII:17955-19707	WT	ksp1-KD	OK	36.5354	51.0352	0.482197	2.97061	5e-05	0.000294606	yes	1.39687	No
YDL045W-A_mRNA	YDL045W-A	YDL045W-A	.	.	IV:372247-372535	WT	ksp1-KD	OK	113.04	157.859	0.4818	2.13352	0.0015	0.00608141	yes	1.39648	No
YBR152W_mRNA	YBR152W	YBR152W	.	.	II:546375-547251	WT	ksp1-KD	OK	27.6729	38.6444	0.481785	2.47022	0.0006	0.0027833	yes	1.39647	No
YOR148C_mRNA	YOR148C	YOR148C	.	.	XV:608639-609197	WT	ksp1-KD	OK	133.02	185.746	0.481689	2.89762	0.0001	0.000557854	yes	1.39638	No
YIL113W_mRNA	YIL113W	YIL113W	.	.	IX:150558-151188	WT	ksp1-KD	OK	51.3004	71.6252	0.481498	2.26659	0.0001	0.000557854	yes	1.39619	No
YGR120C_mRNA	YGR120C	YGR120C	.	.	VII:730032-730821	WT	ksp1-KD	OK	40.5049	56.5486	0.481397	2.24468	0.0002	0.00103818	yes	1.39609	No
YLR276C_mRNA	YLR276C	YLR276C	.	.	XII:695045-696830	WT	ksp1-KD	OK	97.6457	136.303	0.481188	1.9556	0.00085	0.00373758	yes	1.39589	No
YPL108W_mRNA	YPL108W	YPL108W	.	.	XVI:348445-348952	WT	ksp1-KD	OK	41.7377	58.2049	0.47979	1.92907	0.00275	0.0100859	yes	1.39454	No
YML081C-A_mRNA	YML081C-A	YML081C-A	.	.	XIII:103982-104162	WT	ksp1-KD	OK	2098.07	2925.72	0.479725	3.07547	0.0001	0.000557854	yes	1.39448	No
YLR038C_mRNA	YLR038C	YLR038C	.	.	XII:224920-225172	WT	ksp1-KD	OK	1132.71	1579.5	0.479686	2.72161	0.00025	0.00126538	yes	1.39444	No
YHR147C_mRNA	YHR147C	YHR147C	.	.	VIII:392638-393283	WT	ksp1-KD	OK	44.6081	62.1965	0.479526	2.59434	0.00025	0.00126538	yes	1.39429	No
YNL286W_mRNA	YNL286W	YNL286W	.	.	XIV:95222-96080	WT	ksp1-KD	OK	86.4762	120.564	0.479428	3.39245	5e-05	0.000294606	yes	1.39419	No
YDR432W_mRNA	YDR432W	YDR432W	.	.	IV:1328782-1330040	WT	ksp1-KD	OK	311.161	433.807	0.479394	1.82501	0.00445	0.0152374	yes	1.39416	No
YBL039W-B_mRNA	YBL039W-B	YBL039W-B	.	.	II:143392-143572	WT	ksp1-KD	OK	412.172	574.464	0.47897	1.76551	0.00825	0.0254832	yes	1.39375	No
YER054C_mRNA	YER054C	YER054C	.	.	V:262051-263698	WT	ksp1-KD	OK	10.275	14.3095	0.477838	3.02182	0.00085	0.00373758	yes	1.39266	No
YBL064C_mRNA	YBL064C	YBL064C	.	.	II:100370-101156	WT	ksp1-KD	OK	352.105	490.298	0.477655	1.75757	0.00225	0.00854632	yes	1.39248	No
YCL058W-A_mRNA	YCL058W-A	YCL058W-A	.	.	III:23522-23981	WT	ksp1-KD	OK	544.931	758.676	0.477411	3.54673	0.00155	0.00624516	yes	1.39224	No
YER026C_mRNA	YER026C	YER026C	.	.	V:207643-208474	WT	ksp1-KD	OK	531.154	739.464	0.47735	2.31812	0.00265	0.00978543	yes	1.39218	No
YDL065C_mRNA	YDL065C	YDL065C	.	.	IV:336248-337277	WT	ksp1-KD	OK	391.056	544.409	0.477317	7.51958	5e-05	0.000294606	yes	1.39215	No
YDR162C_mRNA	YDR162C	YDR162C	.	.	IV:780389-781100	WT	ksp1-KD	OK	99.9123	139.036	0.476723	2.37009	5e-05	0.000294606	yes	1.39158	No
YBR126W-B_mRNA	YBR126W-B	YBR126W-B	.	.	II:490849-491070	WT	ksp1-KD	OK	1863.33	2592.78	0.476611	2.13387	0.0065	0.0209645	yes	1.39147	No
YPL096C-A_mRNA	YPL096C-A	YPL096C-A	.	.	XVI:366528-366735	WT	ksp1-KD	OK	207.167	288.257	0.47656	2.26562	0.00505	0.016935	yes	1.39142	No
YBR253W_mRNA	YBR253W	YBR253W	.	.	II:723269-723635	WT	ksp1-KD	OK	419.532	583.601	0.476201	4.082	0.0002	0.00103818	yes	1.39108	No
YDR482C_mRNA	YDR482C	YDR482C	.	.	IV:1420430-1420838	WT	ksp1-KD	OK	390.247	542.491	0.47521	4.88036	0.0001	0.000557854	yes	1.39012	No
YPR151C_mRNA	YPR151C	YPR151C	.	.	XVI:830998-831675	WT	ksp1-KD	OK	83.29	115.778	0.475151	2.6156	0.0004	0.00194581	yes	1.39006	No
YCR026C_mRNA	YCR026C	YCR026C	.	.	III:164110-166339	WT	ksp1-KD	OK	69.5488	96.6726	0.475082	2.0424	0.00015	0.000804996	yes	1.39	No
YDR065W_mRNA	YDR065W	YDR065W	.	.	IV:580686-581784	WT	ksp1-KD	OK	39.8971	55.4476	0.474839	2.26232	0.00015	0.000804996	yes	1.38976	No
YNL189W_mRNA	YNL189W	YNL189W	.	.	XIV:284259-285888	WT	ksp1-KD	OK	238.359	331.182	0.474488	1.8468	0.00345	0.0122522	yes	1.38943	No
YHR006W_mRNA	YHR006W	YHR006W	.	.	VIII:117813-119439	WT	ksp1-KD	OK	62.9869	87.3626	0.471964	2.83869	0.00035	0.00171801	yes	1.387	No
YER092W_mRNA	YER092W	YER092W	.	.	V:342854-343232	WT	ksp1-KD	OK	730.549	1013	0.471588	3.87353	0.0002	0.00103818	yes	1.38663	No
YCR027C_mRNA	YCR027C	YCR027C	.	.	III:167369-167999	WT	ksp1-KD	OK	69.8799	96.8206	0.470436	2.26595	5e-05	0.000294606	yes	1.38553	No
YJR152W_mRNA	YJR152W	YJR152W	.	.	X:719665-721297	WT	ksp1-KD	OK	3255.91	4510.39	0.470194	1.41052	0.01705	0.0466953	yes	1.3853	No
YJR096W_mRNA	YJR096W	YJR096W	.	.	X:611194-612043	WT	ksp1-KD	OK	204.922	283.875	0.470186	2.0214	0.00055	0.00257711	yes	1.38529	No
YLR291C_mRNA	YLR291C	YLR291C	.	.	XII:718316-719462	WT	ksp1-KD	OK	87.9208	121.759	0.469756	2.31672	0.00015	0.000804996	yes	1.38488	No
YOR205C_mRNA	YOR205C	YOR205C	.	.	XV:725563-727234	WT	ksp1-KD	OK	21.1213	29.2453	0.469507	2.22538	5e-05	0.000294606	yes	1.38464	No
YPR131C_mRNA	YPR131C	YPR131C	.	.	XVI:793910-794498	WT	ksp1-KD	OK	61.8382	85.5834	0.468833	2.20039	0.0002	0.00103818	yes	1.38399	No
YGR044C_mRNA	YGR044C	YGR044C	.	.	VII:582989-583892	WT	ksp1-KD	OK	23.1499	32.0345	0.468621	2.4569	0.0003	0.00149174	yes	1.38379	No
YDL072C_mRNA	YDL072C	YDL072C	.	.	IV:329835-330447	WT	ksp1-KD	OK	288.928	399.813	0.468615	1.98197	0.00125	0.00521757	yes	1.38378	No
YPL104W_mRNA	YPL104W	YPL104W	.	.	XVI:355699-357676	WT	ksp1-KD	OK	16.5358	22.8792	0.468441	2.30137	0.00065	0.00297909	yes	1.38361	No
YPR037C_mRNA	YPR037C	YPR037C	.	.	XVI:646447-648375	WT	ksp1-KD	OK	238.218	329.581	0.468348	2.34213	0.01325	0.0379514	yes	1.38352	No
YOR113W_mRNA	YOR113W	YOR113W	.	.	XV:534074-536819	WT	ksp1-KD	OK	14.4091	19.9321	0.468111	2.33709	5e-05	0.000294606	yes	1.3833	No
YGR057C_mRNA	YGR057C	YGR057C	.	.	VII:604772-605501	WT	ksp1-KD	OK	85.4152	118.153	0.468088	2.2662	5e-05	0.000294606	yes	1.38328	No
YGR240C-A_mRNA	YGR240C-A	YGR240C-A	.	.	VII:974576-974777	WT	ksp1-KD	OK	306.546	423.473	0.466167	1.6239	0.006	0.0196344	yes	1.38143	No
YMR178W_mRNA	YMR178W	YMR178W	.	.	XIII:618478-619303	WT	ksp1-KD	OK	116.614	161.077	0.466009	2.64268	0.0003	0.00149174	yes	1.38128	No
YHR176W_mRNA	YHR176W	YHR176W	.	.	VIII:454228-455527	WT	ksp1-KD	OK	27.4896	37.9605	0.465611	2.22211	5e-05	0.000294606	yes	1.3809	No
YFL021W_mRNA	YFL021W	YFL021W	.	.	VI:95760-97498	WT	ksp1-KD	OK	79.9207	110.339	0.465307	1.81495	0.0013	0.0053882	yes	1.38061	No
YBR126W-A_mRNA	YBR126W-A	YBR126W-A	.	.	II:490849-491070	WT	ksp1-KD	OK	380.196	524.783	0.464978	1.56181	0.0169	0.0463431	yes	1.3803	No
YOL143C_mRNA	YOL143C	YOL143C	.	.	XV:54594-55104	WT	ksp1-KD	OK	456.436	629.953	0.464829	2.72274	0.0003	0.00149174	yes	1.38015	No
YJL212C_mRNA	YJL212C	YJL212C	.	.	X:33849-36249	WT	ksp1-KD	OK	84.6382	116.81	0.464779	2.01245	0.00345	0.0122522	yes	1.38011	No
YFR017C_mRNA	YFR017C	YFR017C	.	.	VI:182273-182861	WT	ksp1-KD	OK	32.9598	45.4547	0.463723	2.00501	0.00125	0.00521757	yes	1.3791	No
YBR295W_mRNA	YBR295W	YBR295W	.	.	II:792848-796499	WT	ksp1-KD	OK	24.4275	33.6758	0.463203	2.0464	0.00045	0.00216794	yes	1.3786	No
YOR076C_mRNA	YOR076C	YOR076C	.	.	XV:469376-471620	WT	ksp1-KD	OK	20.7602	28.6103	0.462713	2.27785	0.00015	0.000804996	yes	1.37813	No
YKL023C-A_mRNA	YKL023C-A	YKL023C-A	.	.	XI:393145-393373	WT	ksp1-KD	OK	143.37	197.546	0.462446	2.08728	0.0041	0.014196	yes	1.37788	No
YLR407W_mRNA	YLR407W	YLR407W	.	.	XII:932966-933653	WT	ksp1-KD	OK	99.6688	137.308	0.462197	2.7958	0.00015	0.000804996	yes	1.37764	No
YLR223C_mRNA	YLR223C	YLR223C	.	.	XII:582005-585490	WT	ksp1-KD	OK	40.8138	56.2222	0.462082	1.95118	0.00055	0.00257711	yes	1.37753	No
YDL168W_mRNA	YDL168W	YDL168W	.	.	IV:159603-160764	WT	ksp1-KD	OK	98.5175	135.683	0.461793	2.13067	0.0003	0.00149174	yes	1.37725	No
YLR007W_mRNA	YLR007W	YLR007W	.	.	XII:164391-165402	WT	ksp1-KD	OK	77.0091	105.99	0.460834	2.35791	0.0003	0.00149174	yes	1.37634	No
YJL046W_mRNA	YJL046W	YJL046W	.	.	X:352385-353615	WT	ksp1-KD	OK	42.2121	58.0894	0.460617	2.19772	0.00015	0.000804996	yes	1.37613	No
YNL095C_mRNA	YNL095C	YNL095C	.	.	XIV:444911-446840	WT	ksp1-KD	OK	20.3059	27.9236	0.45959	2.26638	0.0001	0.000557854	yes	1.37515	No
YGR183C_mRNA	YGR183C	YGR183C	.	.	VII:859062-859476	WT	ksp1-KD	OK	1440.51	1980.62	0.459374	2.28422	0.00015	0.000804996	yes	1.37495	No
YAR015W_mRNA	YAR015W	YAR015W	.	.	I:169374-170295	WT	ksp1-KD	OK	253.584	348.521	0.45878	1.78962	0.0023	0.00871078	yes	1.37438	No
YOR269W_mRNA	YOR269W	YOR269W	.	.	XV:826384-827869	WT	ksp1-KD	OK	15.5335	21.3487	0.458766	2.02256	0.00065	0.00297909	yes	1.37437	No
YNL122C_mRNA	YNL122C	YNL122C	.	.	XIV:398022-398370	WT	ksp1-KD	OK	44.2839	60.8498	0.458472	2.89542	0.0065	0.0209645	yes	1.37409	No
YLR079W_mRNA	YLR079W	YLR079W	.	.	XII:286819-287674	WT	ksp1-KD	OK	96.1837	132.163	0.458457	2.15127	0.0005	0.00238233	yes	1.37407	No
YNL024C-A_mRNA	YNL024C-A	YNL024C-A	.	.	XIV:586601-586820	WT	ksp1-KD	OK	417.99	574.047	0.4577	2.72026	0.0007	0.00317245	yes	1.37335	No
YPL213W_mRNA	YPL213W	YPL213W	.	.	XVI:150613-151330	WT	ksp1-KD	OK	108.232	148.639	0.457684	3.218	0.00035	0.00171801	yes	1.37334	No
YLR107W_mRNA	YLR107W	YLR107W	.	.	XII:364115-365330	WT	ksp1-KD	OK	58.287	80.0464	0.457663	2.56663	0.00015	0.000804996	yes	1.37332	No
YGR129W_mRNA	YGR129W	YGR129W	.	.	VII:750399-751047	WT	ksp1-KD	OK	40.8236	56.0608	0.45759	1.87292	0.0021	0.00808046	yes	1.37325	No
[truncated: 5,931 more rows]

## Sheet: glossary
Column name	Example	Description
[truncated: 18 more rows]

[truncated: 1 more sheets: info]
