# Supplementary material
Source: publisher figshare collection journal article supplement (https://gsajournals.figshare.com/articles/dataset/_/8956511)

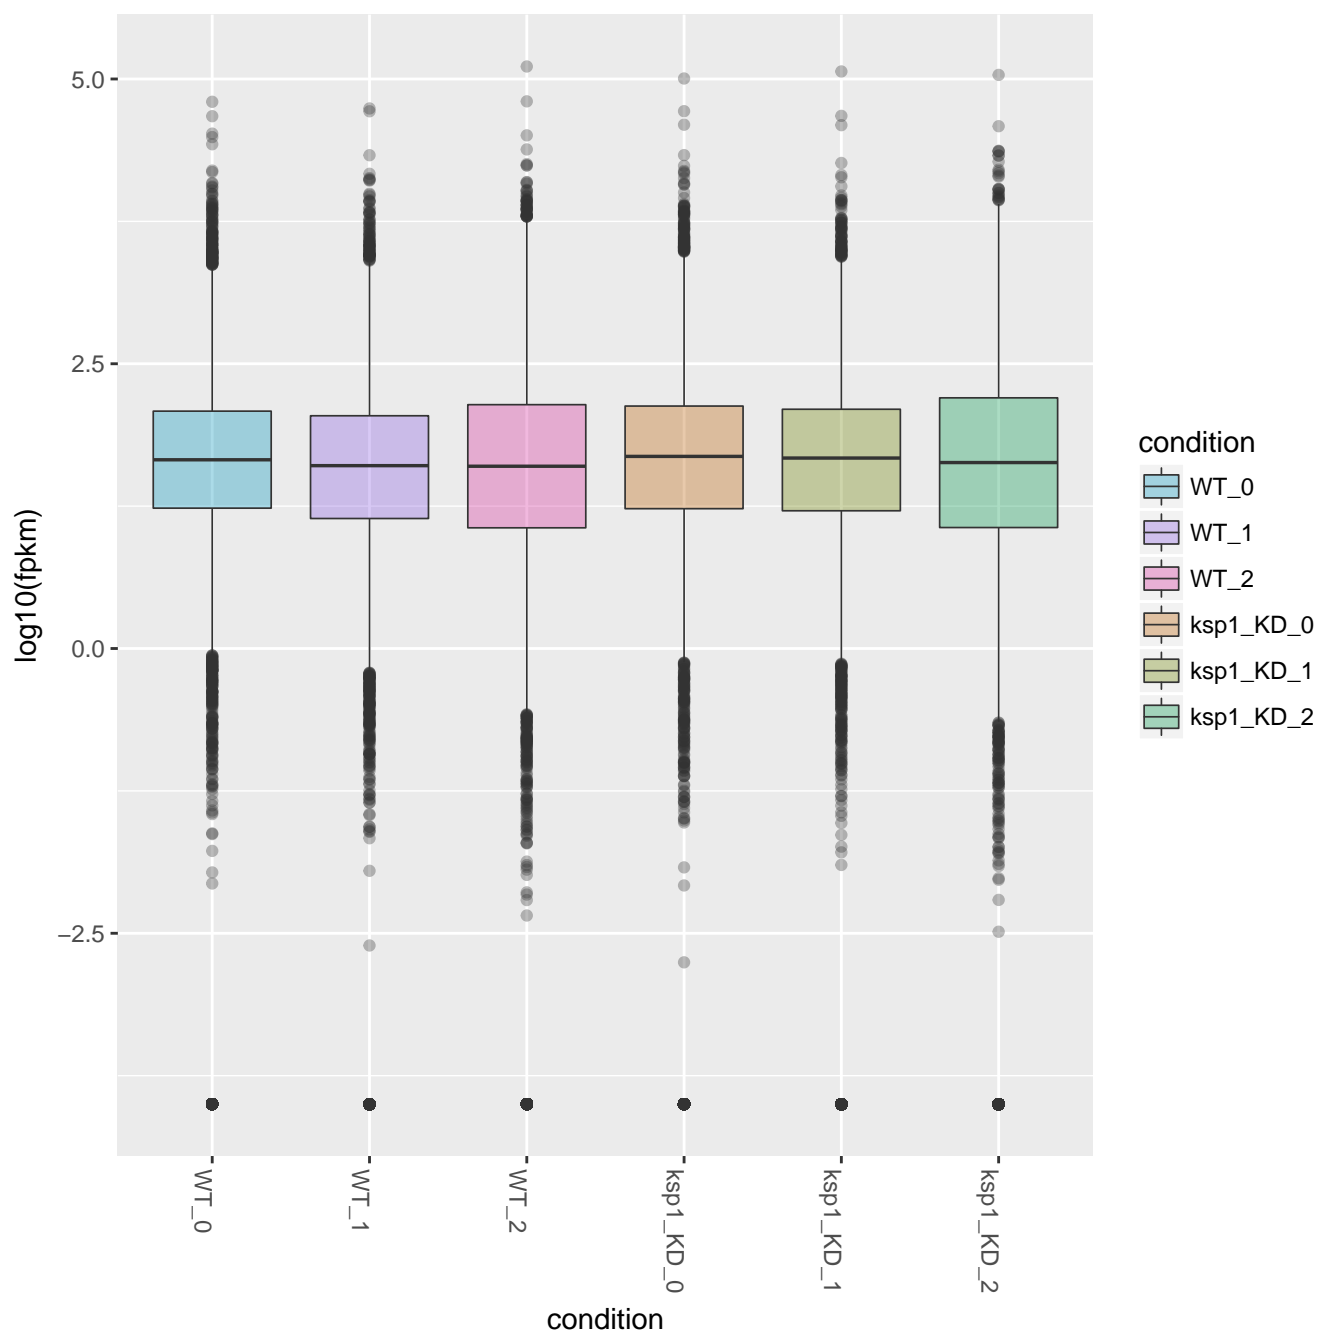

Supplement: Supplementary file 2 [file 1]

# Non-normalized Counts

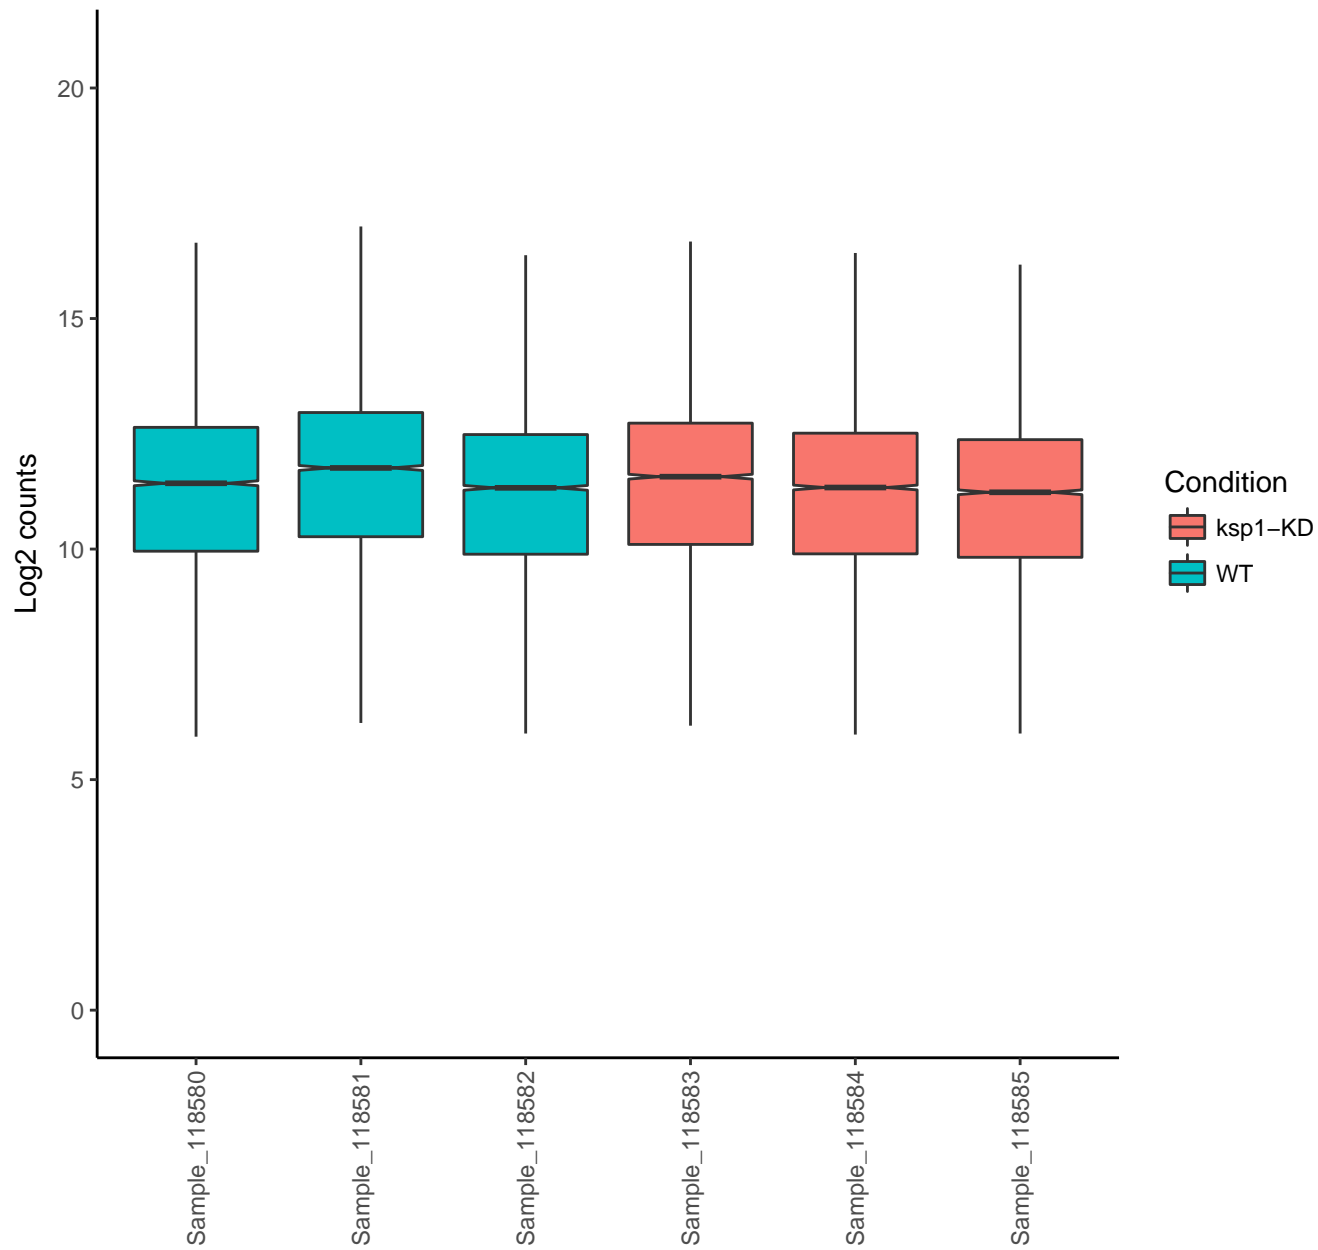

Depth-normalized Counts

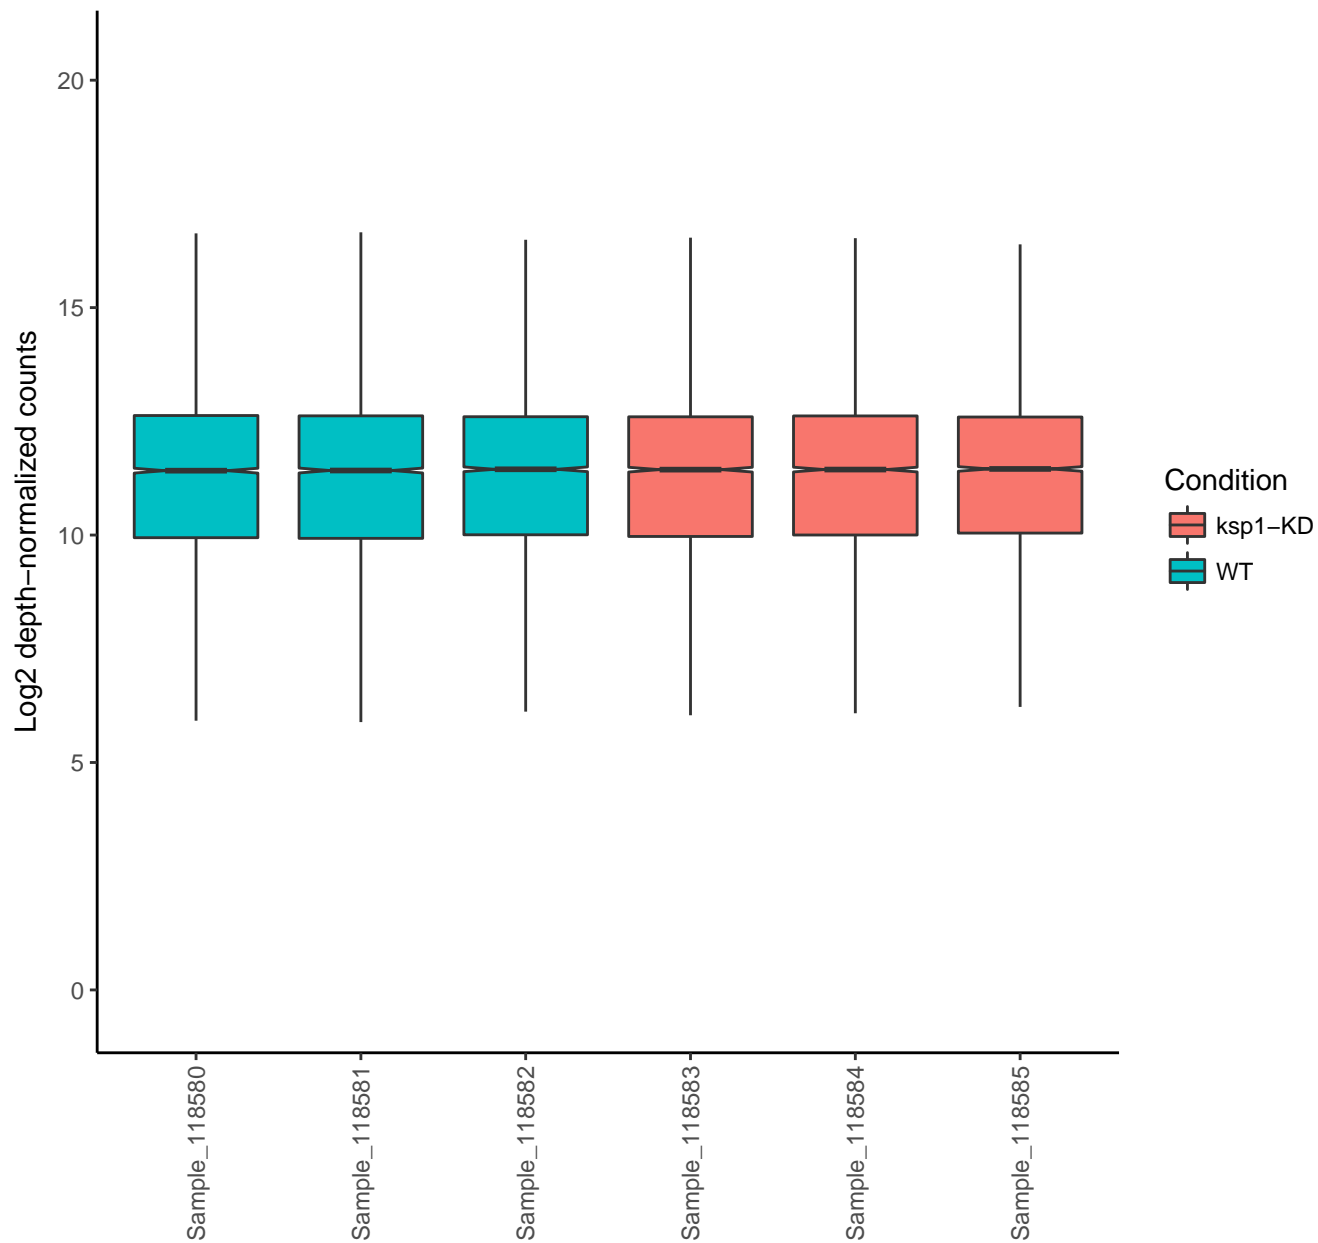

Rlog-normalized Counts

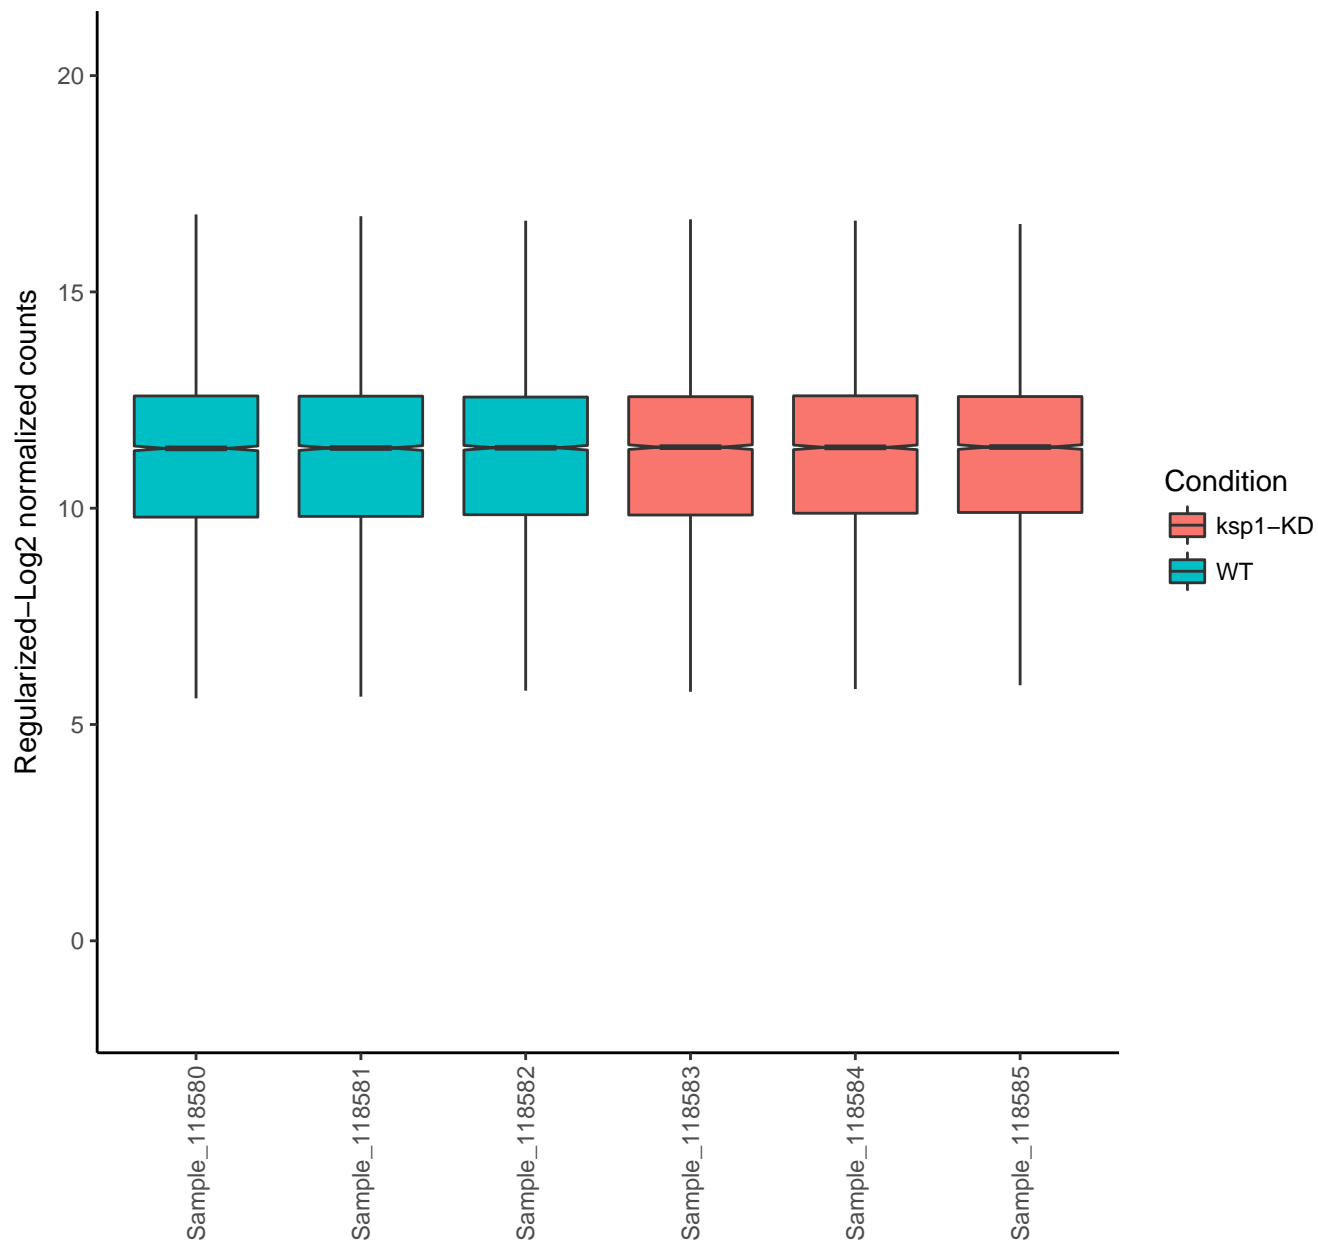

Supplement: Supplementary file 3 [file 1]
